# Supplementary material
Source: Royal Society of Chemistry journal article supplement (doi:10.1039/d6ob00398b)
Supplement: d6ob00398b1.pdf [file d6ob00398b1.pdf]

## Enantioselective [3 + 2] Cycloaddition of Spirocyclopropyloxindoles with 2-(Phthalimido)acrylates: Access to Spirocyclopentaneoxindoles

Jing Shan,<sup>a,b</sup> Zhen-Fu Ke,<sup>a,b</sup> Lei Qin,<sup>b,c</sup> Bao-Dong Cui,<sup>b,c,\*</sup> Jiang-Yu Zhao,<sup>a,\*</sup> Yongzheng Chen<sup>a,b,c,\*</sup>

<sup>a</sup>*Xinjiang Technical Institute of Physics and Chemistry, University of Chinese Academy of Sciences, Xinjiang 830011, China.*

<sup>b</sup>*Guizhou Provincial Key Laboratory of Innovation and Manufacturing for Pharmaceuticals, School of Pharmacy, Green Pharmaceuticals Engineering Research Center of Guizhou Province, Zunyi Medical University, Zunyi 563003, China.*

<sup>c</sup>*Key Laboratory of Basic Pharmacology of Ministry of Education and Joint International Research Laboratory of Ethno-medicine of Ministry of Education, School of Pharmacy, Zunyi Medical University, Zunyi 563003, China.*

### Supporting information

#### Table of contents

|                                                                               |            |
|-------------------------------------------------------------------------------|------------|
| <b>1. General information .....</b>                                           | <b>1</b>   |
| <b>2. General procedure for the synthesis of compounds 1 .....</b>            | <b>1</b>   |
| <b>3. General procedure for the synthesis of compounds 2 .....</b>            | <b>3</b>   |
| <b>4. General procedure for the synthesis of compounds 3 .....</b>            | <b>4</b>   |
| <b>5. Procedure for the synthesis of compound 4.....</b>                      | <b>28</b>  |
| <b>6. Procedure for the synthesis of compound 5.....</b>                      | <b>29</b>  |
| <b>7. Procedure for the synthesis of compound 6.....</b>                      | <b>30</b>  |
| <b>8. Crystallographic information for compounds of 3n, 3n'and 3n'' .....</b> | <b>31</b>  |
| <b>8.1 Crystallographic information for compound 3n .....</b>                 | <b>32</b>  |
| <b>8.2 Crystallographic information for compound 3n'.....</b>                 | <b>33</b>  |
| <b>8.3 Crystallographic information for compound 3n'' .....</b>               | <b>34</b>  |
| <b>9. NMR and HPLC spectra for compounds .....</b>                            | <b>35</b>  |
| <b>9.1 NMR spectra for compounds.....</b>                                     | <b>35</b>  |
| <b>9.2 HPLC spectra for compounds .....</b>                                   | <b>122</b> |

## 1. General information

Reagents were purchased from commercial sources and were directly used unless otherwise noted.  $^1\text{H}$  NMR and  $^{13}\text{C}$  NMR (400 MHz and 101 MHz, respectively) spectra were recorded in  $\text{CDCl}_3$ .  $^1\text{H}$  NMR chemical shifts are reported in ppm relative to tetramethylsilane (TMS) with the solvent resonance employed as the internal standard ( $\text{CDCl}_3$  at 7.26 ppm). Data are reported as follows: chemical shift, multiplicity (s = singlet, d = doublet, t = triplet, q = quartet and m = multiplet), coupling constants (Hz) and integration.  $^{13}\text{C}$  NMR chemical shifts are reported in ppm relative to tetramethylsilane (TMS) with the solvent resonance as the internal standard ( $\text{CDCl}_3$  at 77.16 ppm). High performance liquid chromatography (HPLC) analysis was performed on an Agilent 1220 Infinity LC instrument equipped with a quaternary pump, using a Chiralpak AD-H, OD-H, IF, IH, AS-H Column ( $250 \times 4.6\text{mm}$ ). UV absorption was monitored at 254 nm. High Resolution Mass spectra were recorded by Waters G2-xs ToF (ESI<sup>+</sup>).

## 2. General procedure for the synthesis of compounds 1

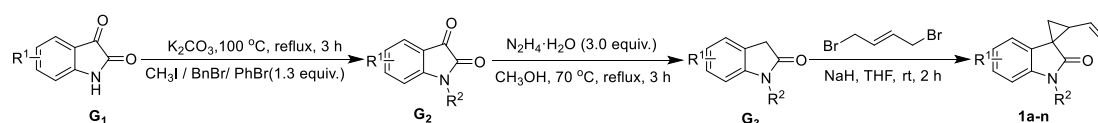

In a dry 250 mL round-bottom flask, compound **G1** (20 mmol) and  $\text{K}_2\text{CO}_3$  (22 mmol) were accurately weighed, followed by the addition of *N,N*-dimethylformamide (40 mL). The mixture was magnetically stirred to disperse the solids sufficiently. The reaction system was placed in an oil bath at  $100\text{ }^\circ\text{C}$  and refluxed for 5 min, after which methyl iodide, benzyl bromide, or phenyl bromide (26 mmol, MeI/BnBr/PhBr) was added dropwise slowly. Upon completion of the dropwise addition, the reaction was continued to reflux in the  $100\text{ }^\circ\text{C}$  oil bath for 3 h, during which the reaction progress was monitored by TLC. After the reaction was completed, heating was stopped and the system was cooled to room temperature. Then, 50 mL of distilled water was added to quench the reaction, and the organic phase was extracted with ethyl acetate ( $3 \times 50\text{ mL}$ ). The combined organic phases were washed with saturated brine three times. After each washing, the mixture was allowed to settle to achieve complete phase separation, and the organic layer was retained. The organic phase was dried over anhydrous  $\text{Na}_2\text{SO}_4$  overnight (or until no obvious moisture was observed). After filtering off the desiccant, the solvent was removed by vacuum concentration to obtain the crude compounds **G2**.

In a 250 mL round-bottom flask, the crude compounds **G2** (20 mmol) were accurately weighed, followed by the addition of methanol (100 mL). Then, hydrazine hydrate (60 mmol) was added. The reaction mixture was placed in an oil bath at  $70\text{ }^\circ\text{C}$  and refluxed for 3 h. After the reaction, methanol was removed by vacuum concentration. The residue was dissolved in water and then extracted with ethyl acetate ( $3 \times 50\text{ mL}$ ), and the combined organic phases were washed with saturated brine three times, dried over anhydrous  $\text{Na}_2\text{SO}_4$ , filtered, and concentrated under reduced pressure to obtain the crude compounds **G3**.

In a 250 mL round-bottom flask, the crude compounds **G3** (20 mmol) were accurately weighed, and tetrahydrofuran (100 mL) was added to dissolve the compound completely. The reaction mixture was cooled to  $0\text{ }^\circ\text{C}$ , and sodium hydride (NaH, 60 mmol, 60% dispersion in mineral oil) was added portionwise under stirring. After stirring for 10 min, (*E*)-1,4-dibromobut-2-ene (20 mmol) was added to the mixture. The reaction system was then allowed to warm up to room temperature and stirred for 2 h, which was monitored by TLC. Upon completion, water was added to quench the reaction. The mixture was extracted with ethyl acetate ( $3 \times 50\text{ mL}$ ), washed with saturated brine

three times, and dried over anhydrous  $\text{MgSO}_4$ . After filtration, the solvent was removed by vacuum concentration, and the crude compound was purified by flash column chromatography (hexane/ethyl acetate = 40:1 to 20:1) to obtain compounds **1**.

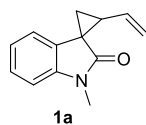

**1'-Methyl-2-vinylspiro[cyclopropane-1,3'-indolin]-2'-one 1a:** White solid; 1.4 g, 35% yield.  $^1\text{H}$  NMR (400 MHz,  $\text{CDCl}_3$ )  $\delta$  7.27 - 7.23 (m, 1H), 7.06 - 7.02 (m, 1H), 6.89 - 6.84 (m, 2H), 6.30 - 6.21 (m, 1H), 5.24 (dd,  $J = 17.2, 1.7$  Hz, 1H), 5.12 (dd,  $J = 10.3, 1.7$  Hz, 1H), 3.27 (s, 3H), 2.53 - 2.46 (m, 1H), 1.98-1.91 (m, 2H).  $^{13}\text{C}$  NMR (101 MHz,  $\text{CDCl}_3$ )  $\delta$  174.8, 143.3, 134.1, 130.4, 126.9, 122.1, 117.9, 116.8, 107.9, 37.2, 33.7, 26.5, 24.7.

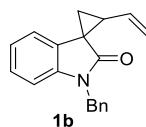

**1'-Benzyl-2-vinylspiro[cyclopropane-1,3'-indolin]-2'-one 1b:** White solid; 1.7 g, 33% yield.  $^1\text{H}$  NMR (400 MHz,  $\text{CDCl}_3$ )  $\delta$  7.30 (d,  $J = 4.4$  Hz, 4H), 7.26 - 7.22 (m, 1H), 7.15 - 7.11 (m, 1H), 7.00 (t,  $J = 7.4$  Hz, 1H), 6.85 (d,  $J = 7.4$  Hz, 1H), 6.76 (d,  $J = 7.8$  Hz, 1H), 6.36 - 6.26 (m, 1H), 5.27 (dd,  $J = 17.3, 1.8$  Hz, 1H), 5.16 (dd,  $J = 10.4, 1.8$  Hz, 1H), 4.97 (s, 2H), 2.54 (q,  $J = 8.6$  Hz, 1H), 2.05 (dd,  $J = 7.8, 4.7$  Hz, 1H), 1.97 (dd,  $J = 8.7, 4.6$  Hz, 1H).  $^{13}\text{C}$  NMR (101 MHz,  $\text{CDCl}_3$ )  $\delta$  174.8, 142.4, 136.2, 134.1, 130.4, 128.8, 127.5, 127.4, 126.7, 122.1, 118.0, 116.9, 108.9, 44.1, 37.5, 33.7, 24.9.

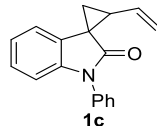

**1'-Phenyl-2-vinylspiro[cyclopropane-1,3'-indolin]-2'-one 1c:** White solid; 1.2 g, 23% yield.  $^1\text{H}$  NMR (400 MHz,  $\text{CDCl}_3$ )  $\delta$  7.57 - 7.53 (m, 2H), 7.50 - 7.47 (m, 2H), 7.44 - 7.40 (m, 1H), 7.23-7.19 (m, 1H), 7.12 - 7.08 (m, 1H), 6.96 - 6.93 (m, 2H), 6.37 - 6.30 (m, 1H), 5.33 (dd,  $J = 17.2, 1.8$  Hz, 1H), 5.19 (dd,  $J = 10.4, 1.8$  Hz, 1H), 2.64 - 2.60 (m, 1H), 2.12 - 2.04 (m, 2H).  $^{13}\text{C}$  NMR (101 MHz,  $\text{CDCl}_3$ )  $\delta$  174.0, 143.1, 134.9, 133.9, 130.2, 129.5, 127.8, 126.7, 126.6, 122.6, 118.2, 117.0, 109.2, 38.0, 33.8, 25.3.

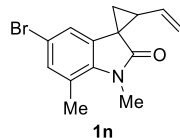

**5'-Bromo-1',7'-dimethyl-2-vinylspiro[cyclopropane-1,3'-indolin]-2'-one 1n:** White solid; 1.2 g, 21% yield.  $^1\text{H}$  NMR (400 MHz,  $\text{CDCl}_3$ )  $\delta$  7.08 (d,  $J = 2.0$  Hz, 1H), 6.74 (d,  $J = 2.1$  Hz, 1H), 6.24 - 6.14 (m, 1H), 5.23 (dd,  $J = 17.2, 1.7$  Hz, 1H), 5.11 (dd,  $J = 10.3, 1.7$  Hz, 1H), 3.50 (s, 3H), 2.54 (s, 3H), 2.43 (q,  $J = 8.7$  Hz, 1H), 1.95 (dd,  $J = 7.9, 4.8$  Hz, 1H), 1.87 (dd,  $J = 8.8, 4.7$  Hz, 1H).  $^{13}\text{C}$  NMR (101 MHz,  $\text{CDCl}_3$ )  $\delta$  174.8, 140.2, 133.7, 133.0, 132.7, 121.5, 119.0, 117.2, 114.4, 38.1, 33.3, 29.7, 25.3, 18.7.

### 3. General procedure for the synthesis of compounds 2

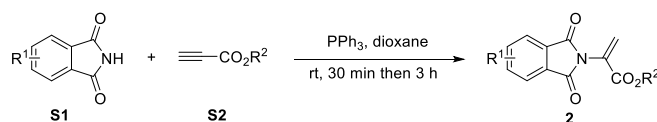

To a magnetically stirred mixture of **S1** (10 mmol) and triphenylphosphine (4 mmol) in 1,4-dioxane (4 mL) was added dropwise a solution of ethyl propiolate/methyl propiolate **S2** (10 mmol) in 1,4-dioxane (6 mL) over 30 min. The reaction mixture was maintained in a room-temperature water bath, and obvious heat evolution was observed. After stirring at room temperature for a further 3 h, the reaction was monitored by TLC until completion. The solvent was removed under reduced pressure, and the crude compound was purified by column chromatography (hexane/ethyl acetate = 3:1) to afford compounds **2**.

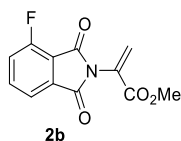

**Methyl 2-(4-fluoro-1,3-dioxoisindolin-2-yl)acrylate 2b**: White solid; 1.6 g, 64% yield.  $^1\text{H}$  NMR (400 MHz,  $\text{CDCl}_3$ )  $\delta$  7.84 - 7.65 (m, 2H), 7.43 (t,  $J = 8.5$  Hz, 1H), 6.69 (s, 1H), 5.99 (s, 1H), 3.80 (s, 3H).  $^{13}\text{C}$  NMR (101 MHz,  $\text{CDCl}_3$ )  $\delta$  165.3 (d,  $J = 3.0$  Hz, 1C), 163.1, 162.6, 158.0 (d,  $J = 265.0$  Hz, 1C), 137.3 (d,  $J = 7.0$  Hz, 1C), 133.9, 128.8, 123.0 (d,  $J = 20.0$  Hz, 1C), 120.2 (d,  $J = 4.0$  Hz, 1C), 117.7 (d,  $J = 12.4$  Hz, 1C), 53.0.

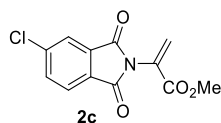

**Methyl 2-(5-chloro-1,3-dioxoisindolin-2-yl)acrylate 2c**: Light yellow solid; 1.1 g, 42% yield.  $^1\text{H}$  NMR (400 MHz,  $\text{CDCl}_3$ )  $\delta$  7.87 - 7.78 (m, 2H), 7.75 - 7.64 (m, 1H), 6.66 (s, 1H), 5.97 (s, 1H), 3.78 (s, 3H).  $^{13}\text{C}$  NMR (101 MHz,  $\text{CDCl}_3$ )  $\delta$  165.4, 165.1, 162.5, 141.2, 134.6, 133.4, 129.8, 128.9, 128.5, 125.2, 124.3, 52.9.

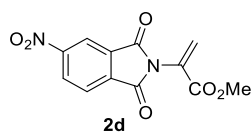

**Methyl 2-(5-nitro-1,3-dioxoisindolin-2-yl)acrylate 2d**: Yellow solid; 1.1 g, 40% yield.  $^1\text{H}$  NMR (400 MHz,  $\text{CDCl}_3$ )  $\delta$  8.71 (s, 1H), 8.65 (d,  $J = 8.2$  Hz, 1H), 8.12 (d,  $J = 8.1$  Hz, 1H), 6.74 (s, 1H), 6.05 (s, 1H), 3.82 (s, 3H).  $^{13}\text{C}$  NMR (101 MHz,  $\text{CDCl}_3$ )  $\delta$  164.4, 164.1, 162.3, 152.1, 136.2, 133.3, 129.8, 129.2, 128.7, 125.3, 119.5, 53.2.

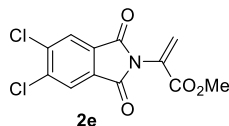

**Methyl 2-(5,6-dichloro-1,3-dioxoisindolin-2-yl)acrylate 2e**: Light yellow solid; 0.95 g, 32% yield.  $^1\text{H}$  NMR (400 MHz,  $\text{CDCl}_3$ )  $\delta$  7.98 (s, 2H), 6.70 (s, 1H), 6.00 (s, 1H), 3.81 (s, 3H).  $^{13}\text{C}$  NMR (101 MHz,  $\text{CDCl}_3$ )  $\delta$  164.5, 162.4, 139.7, 130.9, 128.9, 128.8, 126.1, 53.1.

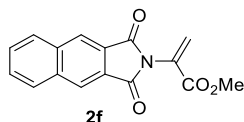

**Methyl 2-(1,3-dioxo-1,3-dihydro-2H-benzo[f]isoindol-2-yl)acrylate 2f:** White solid; 1.0 g, 36% yield. <sup>1</sup>H NMR (400 MHz, CDCl<sub>3</sub>) δ 8.38 (s, 2H), 8.10 - 8.04 (m, 2H), 7.72 -7.70 (m, 2H), 6.72 (s, 1H), 6.05 (s, 1H), 3.82 (s, 3H). <sup>13</sup>C NMR (101 MHz, CDCl<sub>3</sub>) δ 166.3, 162.8, 135.7, 130.4, 129.6, 129.4, 128.3, 127.4, 125.6, 53.0.

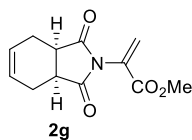

**Methyl 2-(1,3-dioxo-1,3,4,5,6,7-hexahydro-2H-isoindol-2-yl)acrylate 2g:** White solid; 2.1 g, 89% yield. <sup>1</sup>H NMR (400 MHz, CDCl<sub>3</sub>) δ 6.54 (s, 1H), 5.90 - 5.88 (m, 2H), 5.79 (s, 1H), 3.72 (s, 3H), 3.17 - 3.15 (m, 2H), 2.57 (d, *J* = 15.7 Hz, 2H), 2.24 (d, *J* = 12.2 Hz, 2H). <sup>13</sup>C NMR (101 MHz, CDCl<sub>3</sub>) δ 178.3, 162.1, 129.6, 128.2, 127.5, 52.7, 39.4, 23.4.

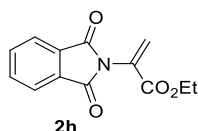

**Ethyl 2-(1,3-dioxoisindolin-2-yl)acrylate 2h:** White solid; 2.1 g, 86% yield. <sup>1</sup>H NMR (400 MHz, CDCl<sub>3</sub>) δ 7.91 -7.87 (m, 2H), 7.78 -7.74 (m, 2H), 6.66 (s, 1H), 5.97 (s, 1H), 4.26 (q, *J* = 7.6 Hz, 2H), 1.27 (t, *J* = 7.3 Hz, 3H). <sup>13</sup>C NMR (101 MHz, CDCl<sub>3</sub>) δ 166.5, 162.3, 134.6, 131.9, 129.5, 127.9, 124.0, 62.1, 14.1.

#### 4. General procedure for the synthesis of compounds 3

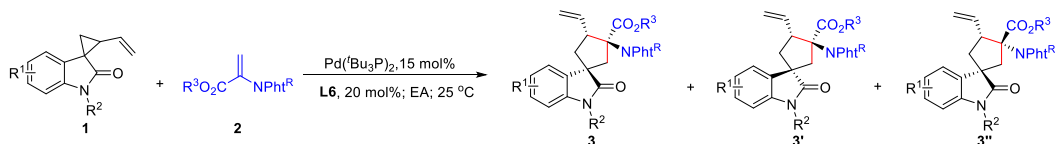

To a mixture of compounds **1** (0.20 mmol) and compounds **2** (0.24 mmol) in 2.0 mL anhydrous ethyl acetate (EA) in a 4 mL flame-dried vial, Pd(*t*-Bu<sub>3</sub>P)<sub>2</sub> (0.03 mmol, 15 mol%) and **L6** (0.04 mmol, 20 mol%) were added sequentially. The mixture was stirred at room temperature under an Ar atmosphere for 24 h. After completion of the reaction indicated by TLC analysis, the reaction mixture was purified by preparative TLC (silica gel, hexane/ethyl acetate (5:1, v/v)) with 4-6 repeated developments, and visualized under UV light (254 nm). The desired band was scraped and eluted with dichloromethane. Filtration and concentration in vacuo afforded the title compounds **3**.

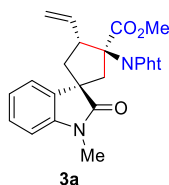

**Methyl (1*S*,3*S*,4*R*)-3-(1,3-dioxoisindolin-2-yl)-1'-methyl-2'-oxo-4-vinylspiro[cyclopentane-1,3'-indoline]-3-carboxylate 3a:** White solid, 29.3 mg, 34% yield, 93% ee; [ $\alpha$ ]<sub>D</sub><sup>25</sup> = - 14.50 (*c* = 1.00, CH<sub>2</sub>Cl<sub>2</sub>), m.p. 98.3 - 99.4 °C. The ee was determined by chiral HPLC (Chiralcel AD-H,

Hexane/*i*-PrOH = 85/15, flow rate 1.5 mL/min,  $\lambda = 254$  nm,  $t_{(1S,2R,4R)-3a} = 12.9$  min (major),  $t_{(1R,2S,4S)-3a} = 19.2$  min (minor).  $^1\text{H NMR}$  (400 MHz,  $\text{CDCl}_3$ )  $\delta$  7.87 - 7.80 (m, 2H), 7.80 - 7.75 (m, 1H), 7.75 - 7.68 (m, 2H), 7.31 - 7.26 (m, 1H), 7.14 (td,  $J = 7.5, 1.0$  Hz, 1H), 6.81 (d,  $J = 7.7$  Hz, 1H), 6.23 - 6.05 (m, 1H), 5.50 - 5.39 (m, 1H), 5.16 (dt,  $J = 8.3, 1.6$  Hz, 1H), 5.12 (d,  $J = 1.7$  Hz, 1H), 3.71 (s, 3H), 3.53 (s, 1H), 3.17 (s, 3H), 2.58 - 2.43 (m, 2H), 2.16 (dd,  $J = 12.8, 6.2$  Hz, 1H).  $^{13}\text{C NMR}$  (101 MHz,  $\text{CDCl}_3$ )  $\delta$  181.7, 172.0, 168.4, 143.3, 136.0, 134.2, 133.4, 131.8, 128.2, 123.7, 123.4, 123.2, 116.3, 107.8, 72.5, 52.5, 51.0, 48.0, 44.5, 40.4, 26.2. HRMS (ESI)  $m/z$ : calculated for  $\text{C}_{25}\text{H}_{22}\text{N}_2\text{O}_5\text{Na}$   $[\text{M}+\text{Na}]^+$ : 453.1426, found: 453.1429.

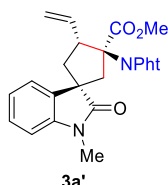

**Methyl (1R,3S,4R)-3-(1,3-dioxoisindolin-2-yl)-1'-methyl-2'-oxo-4-vinylspiro[cyclopentane-1,3'-indoline]-3-carboxylate 3a'**: White solid, 19.5 mg, 23% yield, 80% ee;  $[\alpha]_{\text{D}}^{25} = -16.97$  ( $c = 1.00$ ,  $\text{CH}_2\text{Cl}_2$ ), m.p. 76.8 - 77.4 °C. The ee was determined by chiral HPLC (Chiralcel AD-H, Hexane/*i*-PrOH = 85/15, flow rate 1.5 mL/min,  $\lambda = 254$  nm,  $t_{(1R,2R,4S)-3a'} = 10.6$  min (minor),  $t_{(1S,2S,4R)-3a'} = 14.2$  min (major)).  $^1\text{H NMR}$  (400 MHz,  $\text{CDCl}_3$ )  $\delta$  7.92 - 7.82 (m, 2H), 7.77 (dd,  $J = 5.5, 3.1$  Hz, 2H), 7.30 - 7.22 (m, 2H), 7.01 - 6.96 (m, 1H), 6.84 (d,  $J = 7.8$  Hz, 1H), 6.26 - 6.15 (m, 1H), 5.23 - 5.13 (m, 2H), 5.10 - 5.03 (m, 1H), 3.77 (s, 3H), 3.72 (d,  $J = 15.2$  Hz, 1H), 3.25 (s, 3H), 2.71 (t,  $J = 12.8$  Hz, 1H), 2.58 (d,  $J = 15.2$  Hz, 1H), 2.00 (ddd,  $J = 12.5, 6.3, 1.8$  Hz, 1H).  $^{13}\text{C NMR}$  (101 MHz,  $\text{CDCl}_3$ )  $\delta$  179.2, 170.7, 168.9, 142.8, 135.8, 135.5, 134.4, 131.7, 128.1, 123.5, 122.8, 122.6, 117.2, 108.1, 73.3, 52.8, 52.3, 47.4, 46.8, 41.3, 26.6. HRMS (ESI)  $m/z$ : calculated for  $\text{C}_{25}\text{H}_{22}\text{N}_2\text{O}_5\text{Na}$   $[\text{M}+\text{Na}]^+$ : 453.1426, found: 453.1429.

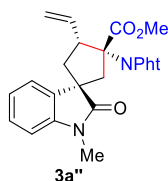

**Methyl (1S,3R,4R)-3-(1,3-dioxoisindolin-2-yl)-1'-methyl-2'-oxo-4-vinylspiro[cyclopentane-1,3'-indoline]-3-carboxylate 3a''**: White solid, 19.5 mg, 23% yield, 88% ee;  $[\alpha]_{\text{D}}^{25} = +81.27$  ( $c = 1.00$ ,  $\text{CH}_2\text{Cl}_2$ ), m.p. 78.2 - 78.4 °C. The ee was determined by chiral HPLC (Chiralcel AD-H, Hexane/*i*-PrOH = 85/15, flow rate 1.5 mL/min,  $\lambda = 254$  nm,  $t_{(1S,2R,4S)-3a''} = 7.9$  min (minor),  $t_{(1R,2S,4R)-3a''} = 10.7$  min (major)).  $^1\text{H NMR}$  (400 MHz,  $\text{CDCl}_3$ )  $\delta$  7.95 (d,  $J = 7.0$  Hz, 1H), 7.83 (dd,  $J = 5.5, 3.0$  Hz, 2H), 7.73 (dd,  $J = 5.5, 3.0$  Hz, 2H), 7.32 - 7.26 (m, 1H), 7.18 - 7.11 (m, 1H), 6.83 - 6.77 (m, 1H), 5.94 - 5.81 (m, 1H), 5.15 - 5.08 (m, 1H), 5.00 - 4.92 (m, 1H), 4.74 - 4.56 (m, 1H), 3.87 (s, 3H), 3.74 (d,  $J = 15.4$  Hz, 1H), 3.18 (s, 3H), 2.77 (d,  $J = 15.4$  Hz, 1H), 2.71 - 2.60 (m, 1H), 2.26 (dd,  $J = 12.8, 6.8$  Hz, 1H).  $^{13}\text{C NMR}$  (101 MHz,  $\text{CDCl}_3$ )  $\delta$  181.2, 171.3, 168.8, 143.6, 135.2, 134.4, 132.8, 131.4, 128.2, 124.0, 123.4, 123.1, 117.7, 107.8, 71.9, 53.1, 52.1, 48.3, 43.1, 41.9, 26.3. HRMS (ESI)  $m/z$ : calculated for  $\text{C}_{25}\text{H}_{22}\text{N}_2\text{O}_5\text{Na}$   $[\text{M}+\text{Na}]^+$ : 453.1426, found: 453.1429.

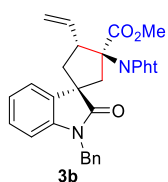

**Methyl (1S,3S,4R)-1'-benzyl-3-(1,3-dioxoisindolin-2-yl)-2'-oxo-4-vinylspiro[cyclopentane-1,3'-indoline]-3-carboxylate 3b**: Yellow solid, 35 mg, 35% yield, 93% ee;  $[\alpha]_{\text{D}}^{25} = +4.31$  ( $c = 0.50$ ,  $\text{CH}_2\text{Cl}_2$ ), m.p. 98.2 - 98.7 °C. The ee was determined by chiral HPLC (Chiralcel AD-H, Hexane/*i*-PrOH = 90/10, flow rate 1.0 mL/min,  $\lambda = 254$  nm,  $t_{(1S,2R,4R)-3b} = 24.8$  min (major),  $t_{(1R,2S,4S)-3b} = 32.7$  min (minor)).  $^1\text{H}$  NMR (400 MHz,  $\text{CDCl}_3$ )  $\delta$  7.88 - 7.79 (m, 3H), 7.72 (dd,  $J = 5.6, 3.0$  Hz, 2H), 7.32 - 7.22 (m, 5H), 7.20 - 7.07 (m, 2H), 6.70 (d,  $J = 7.6$  Hz, 1H), 6.27 - 6.09 (m, 1H), 5.57 - 5.43 (m, 1H), 5.25 - 5.10 (m, 2H), 4.96 - 4.77 (m, 2H), 3.71 (s, 3H), 3.61 (d,  $J = 14.9$  Hz, 1H), 2.61 - 2.50 (m, 2H), 2.22 (dd,  $J = 12.9, 6.2$  Hz, 1H).  $^{13}\text{C}$  NMR (101 MHz,  $\text{CDCl}_3$ )  $\delta$  181.9, 172.1, 168.5, 142.4, 136.0, 134.2, 133.4, 131.9, 128.9, 128.1, 127.7, 127.3, 123.9, 123.4, 123.3, 116.3, 108.8, 72.5, 52.5, 51.0, 48.3, 44.6, 43.7, 40.6. HRMS (ESI)  $m/z$ : calculated for  $\text{C}_{31}\text{H}_{26}\text{N}_2\text{O}_5\text{Na}$   $[\text{M}+\text{Na}]^+$ : 529.1739, found: 529.1741.

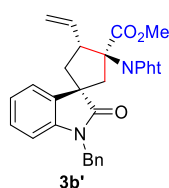

**Methyl (1R,3S,4R)-1'-benzyl-3-(1,3-dioxoisindolin-2-yl)-2'-oxo-4-vinylspiro[cyclopentane-1,3'-indoline]-3-carboxylate 3b'**: White solid, 17.5 mg, 17% yield, 83% ee;  $[\alpha]_{\text{D}}^{25} = -3.66$  ( $c = 0.50$ ,  $\text{CH}_2\text{Cl}_2$ ), m.p. 87.1 - 87.3 °C. The ee was determined by chiral HPLC (Chiralcel AD-H, Hexane/*i*-PrOH = 90/10, flow rate 1.0 mL/min,  $\lambda = 254$  nm,  $t_{(1R,2R,4S)-3b'} = 41.0$  min (major),  $t_{(1S,2S,4R)-3b'} = 43.7$  min (minor)).  $^1\text{H}$  NMR (400 MHz,  $\text{CDCl}_3$ )  $\delta$  7.90 - 7.84 (m, 2H), 7.79 - 7.73 (m, 2H), 7.33 - 7.24 (m, 6H), 7.11 (t,  $J = 7.7$  Hz, 1H), 6.94 (t,  $J = 7.5$  Hz, 1H), 6.71 (d,  $J = 7.8$  Hz, 1H), 6.27 - 6.14 (m, 1H), 5.26 - 5.14 (m, 2H), 5.14 - 5.07 (m, 1H), 5.01 - 4.88 (m, 2H), 3.87 - 3.76 (m, 4H), 2.79 (t,  $J = 12.5$  Hz, 1H), 2.56 (dd,  $J = 15.1, 1.7$  Hz, 1H), 2.11 - 2.03 (m, 1H).  $^{13}\text{C}$  NMR (101 MHz,  $\text{CDCl}_3$ )  $\delta$  179.4, 170.8, 169.0, 141.9, 135.9, 135.8, 135.5, 134.5, 131.7, 128.9, 128.0, 127.7, 127.3, 123.6, 122.9, 122.8, 117.3, 109.2, 73.5, 52.9, 52.5, 47.8, 46.8, 44.1, 41.5. HRMS (ESI)  $m/z$ : calculated for  $\text{C}_{31}\text{H}_{26}\text{N}_2\text{O}_5\text{Na}$   $[\text{M}+\text{Na}]^+$ : 529.1739, found: 529.1741.

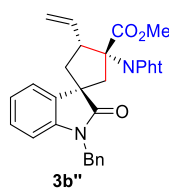

**Methyl (1S,3R,4R)-1'-benzyl-3-(1,3-dioxoisindolin-2-yl)-2'-oxo-4-vinylspiro[cyclopentane-1,3'-indoline]-3-carboxylate 3b''**: White solid, 17.5 mg, 17% yield, 60% ee;  $[\alpha]_{\text{D}}^{25} = +27.95$  ( $c = 0.50$ ,  $\text{CH}_2\text{Cl}_2$ ), m.p. 85.9 - 86.2 °C. The ee was determined by chiral HPLC (Chiralcel AD-H, Hexane/*i*-PrOH = 90/10, flow rate 1.0 mL/min,  $\lambda = 254$  nm,  $t_{(1S,2R,4S)-3b''} = 21.3$  min (minor),  $t_{(1R,2S,4R)-3b''} = 29.6$  min (major)).  $^1\text{H}$  NMR (400 MHz,  $\text{CDCl}_3$ )  $\delta$  7.98 (d,  $J = 6.6$  Hz, 1H), 7.88 - 7.80 (m, 2H), 7.77 - 7.71 (m, 2H), 7.33 - 7.24 (m, 5H), 7.19 - 7.08 (m, 2H), 6.69 (d,  $J = 7.5$  Hz, 1H), 5.96 - 5.82 (m, 1H), 5.17 - 5.09 (m, 1H), 5.02 - 4.93 (m, 2H), 4.78 (d,  $J = 15.8$  Hz, 1H), 4.75 - 4.66 (m, 1H), 3.89 (s, 3H), 3.78 (d,  $J = 15.4$  Hz, 1H), 2.84 (d,  $J = 15.4$  Hz, 1H), 2.71 (t,  $J = 12.3$  Hz, 1H), 2.31 (dd,  $J = 12.8, 6.8$  Hz, 1H).  $^{13}\text{C}$  NMR (101 MHz,  $\text{CDCl}_3$ )  $\delta$  181.4, 171.4, 168.9, 142.7, 136.1, 135.1, 134.4, 132.7, 131.5, 128.9, 128.2, 127.7, 127.4, 124.2, 123.4, 123.2, 117.8, 108.9, 72.0, 53.3, 52.2, 48.3, 43.7, 43.3, 42.3. HRMS (ESI)  $m/z$ : calculated for  $\text{C}_{31}\text{H}_{26}\text{N}_2\text{O}_5\text{Na}$   $[\text{M}+\text{Na}]^+$ : 529.1739, found: 529.1741.

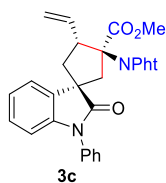

**Methyl (1S,3S,4R)-3-(1,3-dioxoisindolin-2-yl)-2'-oxo-1'-phenyl-4-vinylspiro[cyclopentane-1,3'-indoline]-3-carboxylate 3c:** Yellow solid, 31.2 mg, 32% yield, 92% ee;  $[\alpha]_{\text{D}}^{25} = +12.95$  ( $c = 0.50$ ,  $\text{CH}_2\text{Cl}_2$ ), m.p. 98.2 - 98.7 °C. The ee was determined by chiral HPLC (Chiralcel OD-H, Hexane/*i*-PrOH = 90/10, flow rate 1.0 mL/min,  $\lambda = 254$  nm,  $t_{(1S,2R,4R)-3c} = 17.2$  min (major),  $t_{(1R,2S,4S)-3c} = 31.0$  min (minor)).  $^1\text{H NMR}$  (400 MHz,  $\text{CDCl}_3$ )  $\delta$  7.87 - 7.80 (m, 3H), 7.71 (dd,  $J = 5.5, 3.0$  Hz, 2H), 7.52 - 7.44 (m, 2H), 7.41 - 7.34 (m, 3H), 7.24 - 7.17 (m, 2H), 6.83 - 6.79 (m, 1H), 6.25 - 6.09 (m, 1H), 5.56 - 5.40 (m, 1H), 5.24 - 5.11 (m, 2H), 3.73 (s, 3H), 3.66 (d,  $J = 15.1$  Hz, 1H), 2.69 - 2.56 (m, 2H), 2.33 (dd,  $J = 13.0, 6.2$  Hz, 1H).  $^{13}\text{C NMR}$  (101 MHz,  $\text{CDCl}_3$ )  $\delta$  181.3, 172.2, 168.4, 143.2, 135.9, 134.4, 134.2, 133.2, 131.9, 129.6, 128.1, 128.0, 126.5, 124.1, 123.8, 123.4, 116.4, 109.2, 72.5, 52.6, 51.3, 48.7, 44.6, 40.9. HRMS (ESI)  $m/z$ : calculated for  $\text{C}_{30}\text{H}_{24}\text{N}_2\text{O}_5\text{Na}$   $[\text{M}+\text{Na}]^+$ : 515.1583, found: 515.1587.

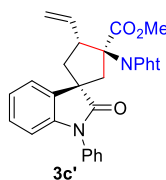

**Methyl (1R,3S,4R)-3-(1,3-dioxoisindolin-2-yl)-2'-oxo-1'-phenyl-4-vinylspiro[cyclopentane-1,3'-indoline]-3-carboxylate 3c':** White solid, 31.2 mg, 32% yield, 84% ee;  $[\alpha]_{\text{D}}^{25} = -14.42$  ( $c = 0.50$ ,  $\text{CH}_2\text{Cl}_2$ ), m.p. 95.9 - 96.3 °C. The ee was determined by chiral HPLC (Chiralcel OD-H, Hexane/*i*-PrOH = 90/10, flow rate 1.0 mL/min,  $\lambda = 254$  nm,  $t_{(1R,2R,4S)-3c'} = 10.6$  min (minor),  $t_{(1S,2S,4R)-3c'} = 14.2$  min (major)).  $^1\text{H NMR}$  (400 MHz,  $\text{CDCl}_3$ )  $\delta$  7.91 - 7.85 (m, 2H), 7.80 - 7.74 (m, 2H), 7.55 - 7.49 (m, 2H), 7.46 - 7.38 (m, 3H), 7.36 (d,  $J = 7.6$  Hz, 1H), 7.20 - 7.14 (m, 1H), 7.06 - 6.99 (m, 1H), 6.86 - 6.81 (m, 1H), 6.29 - 6.18 (m, 1H), 5.24 - 5.14 (m, 2H), 5.12 - 5.03 (m, 1H), 3.80 (d,  $J = 15.2$  Hz, 1H), 3.76 (s, 3H), 2.82 (t,  $J = 12.5$  Hz, 1H), 2.69 (d,  $J = 15.1$  Hz, 1H), 2.16 (dd,  $J = 12.9, 6.8$  Hz, 1H).  $^{13}\text{C NMR}$  (101 MHz,  $\text{CDCl}_3$ )  $\delta$  178.9, 170.7, 169.0, 142.7, 135.8, 135.6, 134.6, 134.5, 131.7, 129.7, 128.1, 128.0, 126.6, 123.6, 123.4, 123.1, 117.4, 109.5, 73.5, 52.9, 52.6, 47.9, 47.1, 42.0. HRMS (ESI)  $m/z$ : calculated for  $\text{C}_{30}\text{H}_{24}\text{N}_2\text{O}_5\text{Na}$   $[\text{M}+\text{Na}]^+$ : 515.1583, found: 515.1587.

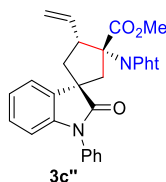

**Methyl (1S,3R,4R)-3-(1,3-dioxoisindolin-2-yl)-2'-oxo-1'-phenyl-4-vinylspiro[cyclopentane-1,3'-indoline]-3-carboxylate 3c'':** White solid, 15.7 mg, 16% yield, 85% ee;  $[\alpha]_{\text{D}}^{25} = +33.35$  ( $c = 0.50$ ,  $\text{CH}_2\text{Cl}_2$ ), m.p. 97.8 - 98.6 °C. The ee was determined by chiral HPLC (Chiralcel OD-H, Hexane/*i*-PrOH = 90/10, flow rate 1.0 mL/min,  $\lambda = 254$  nm,  $t_{(1S,2R,4S)-3c''} = 15.8$  min (major),  $t_{(1R,2S,4R)-3c''} = 18.8$  min (minor)).  $^1\text{H NMR}$  (400 MHz,  $\text{CDCl}_3$ )  $\delta$  8.21 - 7.98 (m, 1H), 7.93 - 7.81 (m, 2H), 7.80 - 7.71 (m, 2H), 7.55 - 7.48 (m, 2H), 7.45 - 7.36 (m, 3H), 7.25 - 7.17 (m, 2H), 6.89 - 6.78 (m, 1H), 6.00 - 5.78 (m, 1H), 5.15 (d,  $J = 17.4$  Hz, 1H), 4.99 (d,  $J = 10.4$  Hz, 1H), 4.82 - 4.61 (m, 1H),

4.08 - 3.78 (m, 4H), 2.93 (d,  $J = 15.5$  Hz, 1H), 2.83 - 2.72 (m, 1H), 2.44 (dd,  $J = 12.8, 6.7$  Hz, 1H).  $^{13}\text{C}$  NMR (101 MHz,  $\text{CDCl}_3$ )  $\delta$  180.7, 171.2, 168.9, 143.4, 135.1, 134.5, 134.4, 132.6, 131.4, 129.6, 128.2, 128.0, 126.7, 124.5, 123.7, 123.4, 117.9, 109.2, 72.0, 53.2, 52.4, 48.2, 43.4, 42.6. HRMS (ESI)  $m/z$ : calculated for  $\text{C}_{30}\text{H}_{24}\text{N}_2\text{O}_5\text{Na}$   $[\text{M}+\text{Na}]^+$ : 515.1583, found: 515.1587.

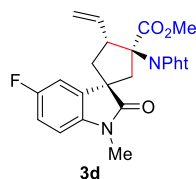

**Methyl (1S,3S,4R)-3-(1,3-dioxoisindolin-2-yl)-5'-fluoro-1'-methyl-2'-oxo-4-vinylspiro[cyclopentane-1,3'-indoline]-3-carboxylate 3d:** Yellow solid, 26 mg, 29% yield, 91% ee;  $[\alpha]_{\text{D}}^{25} = -3.40$  ( $c = 0.50$ ,  $\text{CH}_2\text{Cl}_2$ ), m.p. 93.6 - 94.6 °C. The ee was determined by chiral HPLC (Chiralcel AD-H, Hexane/*i*-PrOH = 85/15, flow rate 1.5 mL/min,  $\lambda = 254$  nm,  $t_{(1S,2R,4R)-3d} = 14.5$  min (major),  $t_{(1R,2S,4S)-3d} = 17.9$  min (minor)).  $^1\text{H}$  NMR (400 MHz,  $\text{CDCl}_3$ )  $\delta$  7.88 - 7.63 (m, 4H), 7.63 - 7.51 (m, 1H), 7.01 - 6.89 (m, 1H), 6.78 - 6.66 (m, 1H), 6.26 - 5.94 (m, 1H), 5.47 - 5.32 (m, 1H), 5.13 (d,  $J = 4.3$  Hz, 1H), 5.10 (s, 1H), 3.69 (s, 3H), 3.47 (d,  $J = 15.0$  Hz, 1H), 3.13 (s, 3H), 2.54 - 2.33 (m, 2H), 2.18 - 2.07 (m, 1H).  $^{13}\text{C}$  NMR (101 MHz,  $\text{CDCl}_3$ )  $\delta$  181.5, 171.9, 168.4, 159.8 (d,  $J = 240.6$  Hz, 1C) 139.2, 135.8, 135.2 (d,  $J = 8.3$  Hz, 1C), 134.2, 131.8, 123.4, 116.4, 114.3 (d,  $J = 23.6$  Hz, 1C), 112.0 (d,  $J = 25.1$  Hz, 1C), 108.2 (d,  $J = 8.2.0$  Hz, 1C), 72.4, 52.5, 51.3, 48.0, 44.6, 40.4, 26.4. HRMS (ESI)  $m/z$ : calculated for  $\text{C}_{25}\text{H}_{21}\text{N}_2\text{O}_5\text{NaF}$   $[\text{M}+\text{Na}]^+$ : 471.1332, found: 471.1335.

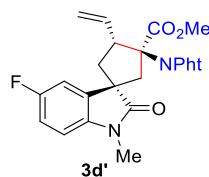

**Methyl (1R,3S,4R)-3-(1,3-dioxoisindolin-2-yl)-5'-fluoro-1'-methyl-2'-oxo-4-vinylspiro[cyclopentane-1,3'-indoline]-3-carboxylate 3d':** White solid, 32.5 mg, 36% yield, 84% ee;  $[\alpha]_{\text{D}}^{25} = -10.88$  ( $c = 0.50$ ,  $\text{CH}_2\text{Cl}_2$ ), m.p. 82.6 - 83.3 °C. The ee was determined by chiral HPLC (Chiralcel AD-H, Hexane/*i*-PrOH = 85/15, flow rate 1.5 mL/min,  $\lambda = 254$  nm,  $t_{(1R,2R,4S)-3d'} = 10.2$  min (minor),  $t_{(1S,2S,4R)-3d'} = 14.1$  min (major)).  $^1\text{H}$  NMR (400 MHz,  $\text{CDCl}_3$ )  $\delta$  7.89 - 7.80 (m, 2H), 7.77 - 7.71 (m, 2H), 7.06 - 6.98 (m, 1H), 6.96 - 6.86 (m, 1H), 6.76 - 6.68 (m, 1H), 6.25 - 6.08 (m, 1H), 5.20 - 5.08 (m, 2H), 4.99 - 4.88 (m, 1H), 3.74 (s, 3H), 3.66 (d,  $J = 15.2$  Hz, 1H), 3.17 (s, 3H), 2.74 - 2.63 (m, 1H), 2.53 (d,  $J = 15.1$  Hz, 1H), 2.00 - 1.94 (m, 1H).  $^{13}\text{C}$  NMR (101 MHz,  $\text{CDCl}_3$ )  $\delta$  178.9, 170.5, 168.9, 159.3 (d,  $J = 240.7$  Hz, 1C), 138.8, 137.3 (d,  $J = 7.8$  Hz, 1C), 135.3, 134.5, 131.6, 123.6, 117.4, 114.1 (d,  $J = 23.3$  Hz, 1C), 111.1 (d,  $J = 25.2$  Hz, 1C), 108.5 (d,  $J = 9.0$  Hz, 1C), 73.2, 52.8, 52.7, 47.2, 46.9, 41.3, 26.7. HRMS (ESI)  $m/z$ : calculated for  $\text{C}_{25}\text{H}_{21}\text{N}_2\text{O}_5\text{NaF}$   $[\text{M}+\text{Na}]^+$ : 471.1332, found: 471.1335.

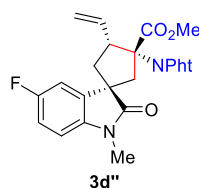

**Methyl (1S,3R,4R)-3-(1,3-dioxoisindolin-2-yl)-5'-fluoro-1'-methyl-2'-oxo-4-vinylspiro[cyclopentane-1,3'-indoline]-3-carboxylate 3d'':** White solid, 13 mg, 15% yield, 77%

ee;  $[\alpha]_D^{25} = +69.64$  ( $c = 0.50$ ,  $\text{CH}_2\text{Cl}_2$ ), m.p. 93.6 - 94.1 °C. The ee was determined by chiral HPLC (Chiralcel AD-H, Hexane/*i*-PrOH = 85/15, flow rate 1.5 mL/min,  $\lambda = 254$  nm,  $t_{(1S,2R,4S)-3d''} = 7.0$  min (minor),  $t_{(1R,2S,4R)-3d''} = 11.4$  min (major)).  $^1\text{H NMR}$  (400 MHz,  $\text{CDCl}_3$ )  $\delta$  7.85 - 7.80 (m, 3H), 7.76 - 7.71 (m, 2H), 7.00 - 6.95 (m, 1H), 6.74 - 6.69 (m, 1H), 5.93 - 5.77 (m, 1H), 5.09 (d,  $J = 16.3$  Hz, 1H), 4.96 (d,  $J = 10.6$  Hz, 1H), 4.77 - 4.59 (m, 1H), 3.86 (s, 3H), 3.71 - 3.67 (m, 1H), 3.17 (s, 3H), 2.74 (d,  $J = 15.6$  Hz, 1H), 2.69 - 2.59 (m, 1H), 2.26 - 2.17 (m, 1H).  $^{13}\text{C NMR}$  (101 MHz,  $\text{CDCl}_3$ )  $\delta$  181.0, 171.2, 168.8, 159.8 (d,  $J = 240.0$  Hz, 1C), 139.6, 134.9, 134.4, 134.3 (d,  $J = 7.6$  Hz, 1C), 131.4, 123.4, 117.8, 114.4 (d,  $J = 23.6$  Hz, 1C), 112.5 (d,  $J = 25.4$  Hz, 1C), 108.2 (d,  $J = 8.3$  Hz, 1C), 71.8, 53.2, 52.6, 48.2, 43.1, 41.9, 26.4. HRMS (ESI)  $m/z$ : calculated for  $\text{C}_{25}\text{H}_{21}\text{N}_2\text{O}_5\text{NaF}$   $[\text{M}+\text{Na}]^+$ : 471.1332, found: 471.1335.

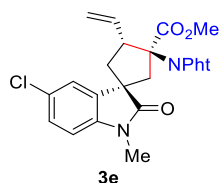

**Methyl (1S,3S,4R)-5'-chloro-3-(1,3-dioxisoindolin-2-yl)-1'-methyl-2'-oxo-4-vinylspiro[cyclopentane-1,3'-indoline]-3-carboxylate 3e:** White solid, 30 mg, 33% yield, 99% ee;  $[\alpha]_D^{25} = -36.80$  ( $c = 0.50$ ,  $\text{CH}_2\text{Cl}_2$ ), m.p. 92.6 - 93.9 °C. The ee was determined by chiral HPLC (Chiralcel AD-H, Hexane/*i*-PrOH = 85/15, flow rate 1.5 mL/min,  $\lambda = 254$  nm,  $t_{(1S,2R,4R)-3e} = 12.6$  min (major),  $t_{(1R,2S,4S)-3e} = 19.7$  min (minor)).  $^1\text{H NMR}$  (400 MHz,  $\text{CDCl}_3$ )  $\delta$  7.88 - 7.76 (m, 3H), 7.74 - 7.67 (m, 2H), 7.23 (dd,  $J = 8.2, 2.3$  Hz, 1H), 6.71 (d,  $J = 8.2$  Hz, 1H), 6.19 - 6.03 (m, 1H), 5.43 - 5.33 (m, 1H), 5.17 - 5.06 (m, 2H), 3.69 (s, 3H), 3.49 (d,  $J = 15.0$  Hz, 1H), 3.13 (s, 3H), 2.49 - 2.36 (m, 2H), 2.18 - 2.09 (m, 1H).  $^{13}\text{C NMR}$  (101 MHz,  $\text{CDCl}_3$ )  $\delta$  181.3, 171.9, 168.4, 141.9, 135.7, 135.1, 134.2, 131.8, 128.6, 128.1, 124.4, 123.4, 116.5, 108.8, 72.4, 52.6, 51.1, 48.0, 44.5, 40.3, 26.4. HRMS (ESI)  $m/z$ : calculated for  $\text{C}_{25}\text{H}_{20}\text{N}_2\text{O}_5\text{Cl}$   $[\text{M}-\text{H}]^-$ : 463.1061, found: 463.1059.

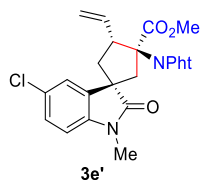

**Methyl (1R,3S,4R)-5'-chloro-3-(1,3-dioxisoindolin-2-yl)-1'-methyl-2'-oxo-4-vinylspiro[cyclopentane-1,3'-indoline]-3-carboxylate 3e':** White solid, 30 mg, 33% yield, 83% ee;  $[\alpha]_D^{25} = -10.37$  ( $c = 0.50$ ,  $\text{CH}_2\text{Cl}_2$ ), m.p. 84.8 - 85.5 °C. The ee was determined by chiral HPLC (Chiralcel AD-H, Hexane/*i*-PrOH = 85/15, flow rate 1.5 mL/min,  $\lambda = 254$  nm,  $t_{(1R,2R,4S)-3e'} = 10.6$  min (minor),  $t_{(1S,2S,4R)-3e'} = 14.2$  min (major)).  $^1\text{H NMR}$  (400 MHz,  $\text{CDCl}_3$ )  $\delta$  7.93 - 7.81 (m, 2H), 7.79 - 7.69 (m, 2H), 7.24 - 7.14 (m, 2H), 6.73 (d,  $J = 8.0$  Hz, 1H), 6.25 - 6.10 (m, 1H), 5.25 - 5.10 (m, 2H), 5.00 - 4.88 (m, 1H), 3.74 (s, 3H), 3.64 (d,  $J = 15.0$  Hz, 1H), 3.20 (s, 3H), 2.67 (t,  $J = 12.3$  Hz, 1H), 2.60 - 2.50 (m, 1H), 2.00 (dd,  $J = 12.8, 6.4$  Hz, 1H).  $^{13}\text{C NMR}$  (101 MHz,  $\text{CDCl}_3$ )  $\delta$  178.9, 170.4, 168.9, 141.4, 137.5, 135.3, 134.5, 131.6, 128.0, 127.9, 123.6, 123.3, 117.5, 109.1, 73.3, 52.8, 52.5, 47.1, 47.0, 41.3, 26.7. HRMS (ESI)  $m/z$ : calculated for  $\text{C}_{25}\text{H}_{20}\text{N}_2\text{O}_5\text{Cl}$   $[\text{M}-\text{H}]^-$ : 463.1061, found: 463.1059.

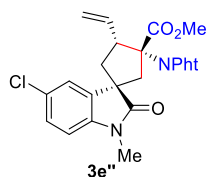

**Methyl (1*S*,3*R*,4*R*)-5'-chloro-3-(1,3-dioxoisindolin-2-yl)-1'-methyl-2'-oxo-4-vinylspiro[cyclopentane-1,3'-indoline]-3-carboxylate **3e'**:** White solid, 18 mg, 20% yield, 79% ee;  $[\alpha]_D^{25} = +84.9$  ( $c = 0.50$ , CH<sub>2</sub>Cl<sub>2</sub>), m.p. 90.2 - 91.3 °C. The ee was determined by chiral HPLC (Chiralcel AD-H, Hexane/*i*-PrOH = 85/15, flow rate 1.5 mL/min,  $\lambda = 254$  nm,  $t_{(1*S*,2*R*,4*S*)-3e''} = 8.5$  min (minor),  $t_{(1*R*,2*S*,4*R*)-3e''} = 16.3$  min (major)). <sup>1</sup>H NMR (400 MHz, CDCl<sub>3</sub>)  $\delta$  8.00 (d,  $J = 2.4$  Hz, 1H), 7.89 - 7.82 (m, 2H), 7.79 - 7.72 (m, 2H), 7.29 - 7.25 (m, 1H), 6.74 (d,  $J = 8.4$  Hz, 1H), 5.96 - 5.75 (m, 1H), 5.11 (d,  $J = 17.3$  Hz, 1H), 4.98 (d,  $J = 10.6$  Hz, 1H), 4.75 - 4.58 (m, 1H), 3.88 (s, 3H), 3.70 (d,  $J = 15.6$  Hz, 1H), 3.18 (s, 3H), 2.76 (d,  $J = 15.5$  Hz, 1H), 2.66 (t,  $J = 12.3$  Hz, 1H), 2.23 (dd,  $J = 12.7, 6.7$  Hz, 1H). <sup>13</sup>C NMR (101 MHz, CDCl<sub>3</sub>)  $\delta$  180.8, 171.2, 168.8, 142.2, 134.9, 134.4, 134.3, 131.4, 128.5, 128.2, 124.8, 123.5, 117.9, 108.7, 71.7, 53.2, 52.4, 48.2, 43.1, 41.9, 26.4. HRMS (ESI)  $m/z$ : calculated for C<sub>25</sub>H<sub>20</sub>N<sub>2</sub>O<sub>5</sub>Cl [M-H]<sup>-</sup>: 463.1061, found: 463.1059.

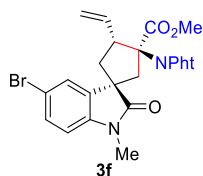

**Methyl (1*S*,3*S*,4*R*)-5'-bromo-3-(1,3-dioxoisindolin-2-yl)-1'-methyl-2'-oxo-4-vinylspiro[cyclopentane-1,3'-indoline]-3-carboxylate **3f**:** White solid, 39.8 mg, 39% yield, 90% ee;  $[\alpha]_D^{25} = -36.84$  ( $c = 0.50$ , CH<sub>2</sub>Cl<sub>2</sub>), m.p. 102.8 - 103.5 °C. The ee was determined by chiral HPLC (Chiralcel AD-H, Hexane/*i*-PrOH = 85/15, flow rate 1.5 mL/min,  $\lambda = 254$  nm,  $t_{(1*S*,2*R*,4*R*)-3f} = 12.9$  min (major),  $t_{(1*R*,2*S*,4*S*)-3f} = 21.3$  min (minor)). <sup>1</sup>H NMR (400 MHz, CDCl<sub>3</sub>)  $\delta$  7.91 (s, 1H), 7.87 - 7.78 (m, 2H), 7.75 - 7.67 (m, 2H), 7.39 (d,  $J = 7.9$  Hz, 1H), 6.67 (d,  $J = 8.2$  Hz, 1H), 6.18 - 6.02 (m, 1H), 5.45 - 5.32 (m, 1H), 5.20 - 5.04 (m, 2H), 3.70 (s, 3H), 3.49 (d,  $J = 15.0$  Hz, 1H), 3.13 (s, 3H), 2.51 - 2.38 (m, 2H), 2.14 (dd,  $J = 12.9, 6.2$  Hz, 1H). <sup>13</sup>C NMR (101 MHz, CDCl<sub>3</sub>)  $\delta$  181.2, 171.9, 168.4, 142.4, 135.7, 135.5, 134.2, 131.8, 131.1, 127.1, 123.4, 116.5, 115.9, 109.3, 72.4, 52.6, 51.1, 48.0, 44.5, 40.3, 26.4. HRMS (ESI)  $m/z$ : calculated for C<sub>25</sub>H<sub>21</sub>N<sub>2</sub>O<sub>5</sub>NaBr [M+Na]<sup>+</sup>: 531.0532, found: 531.0534.

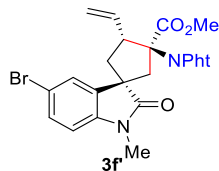

**Methyl (1*R*,3*S*,4*R*)-5'-bromo-3-(1,3-dioxoisindolin-2-yl)-1'-methyl-2'-oxo-4-vinylspiro[cyclopentane-1,3'-indoline]-3-carboxylate **3f'**:** White solid, 39.8 mg, 39% yield, 83% ee;  $[\alpha]_D^{25} = -4.82$  ( $c = 0.50$ , CH<sub>2</sub>Cl<sub>2</sub>), m.p. 85.6 - 86.5 °C. The ee was determined by chiral HPLC (Chiralcel AD-H, Hexane/*i*-PrOH = 85/15, flow rate 1.5 mL/min,  $\lambda = 254$  nm,  $t_{(1*R*,2*R*,4*S*)-3f'} = 15.6$  min (minor),  $t_{(1*S*,2*S*,4*R*)-3f'} = 19.5$  min (major)). <sup>1</sup>H NMR (400 MHz, CDCl<sub>3</sub>)  $\delta$  7.94 - 7.83 (m, 2H), 7.80 - 7.71 (m, 2H), 7.42 - 7.29 (m, 2H), 6.69 (d,  $J = 8.8$  Hz, 1H), 6.28 - 6.10 (m, 1H), 5.24 - 5.10 (m, 2H), 4.97 - 4.88 (m, 1H), 3.74 (s, 3H), 3.63 (d,  $J = 15.2$  Hz, 1H), 3.20 (s, 3H), 2.66 (t,  $J = 12.4$

Hz, 1H), 2.56 (d,  $J = 15.2$  Hz, 1H), 2.06 - 1.98 (m, 1H).  $^{13}\text{C}$  NMR (101 MHz,  $\text{CDCl}_3$ )  $\delta$  178.9, 170.4, 168.9, 141.9, 137.9, 135.4, 134.5, 131.6, 130.9, 126.1, 123.6, 117.5, 115.4, 109.6, 73.4, 52.8, 52.4, 47.2, 47.0, 41.4, 26.7. HRMS (ESI)  $m/z$ : calculated for  $\text{C}_{25}\text{H}_{21}\text{N}_2\text{O}_5\text{NaBr}$   $[\text{M}+\text{Na}]^+$ : 531.0532, found: 531.0534.

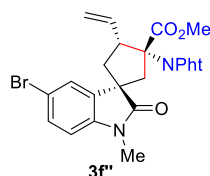

**Methyl (1*S*,3*R*,4*R*)-5'-bromo-3-(1,3-dioxisoindolin-2-yl)-1'-methyl-2'-oxo-4-vinylspiro[cyclopentane-1,3'-indoline]-3-carboxylate 3f'':** White solid, 10.8 mg, 11% yield, 81% ee;  $[\alpha]_{\text{D}}^{25} = +72.69$  ( $c = 0.50$ ,  $\text{CH}_2\text{Cl}_2$ ), m.p. 102.2 - 103.3 °C. The ee was determined by chiral HPLC (Chiralcel AD-H, Hexane/*i*-PrOH = 85/15, flow rate 1.5 mL/min,  $\lambda = 254$  nm,  $t_{(1*S*,2*R*,4*S*)-3f''} = 9.0$  min (minor),  $t_{(1*R*,2*S*,4*R*)-3f''} = 17.4$  min (major)).  $^1\text{H}$  NMR (400 MHz,  $\text{CDCl}_3$ )  $\delta$  8.11 (s, 1H), 7.87 - 7.82 (m, 2H), 7.77 - 7.72 (m, 2H), 7.45 - 7.39 (m, 1H), 6.68 (d,  $J = 8.3$  Hz, 1H), 5.94 - 5.75 (m, 1H), 5.10 (d,  $J = 17.2$  Hz, 1H), 4.97 (d,  $J = 10.6$  Hz, 1H), 4.70 - 4.57 (m, 1H), 3.87 (s, 3H), 3.68 (d,  $J = 15.6$  Hz, 1H), 3.16 (s, 3H), 2.75 (d,  $J = 15.4$  Hz, 1H), 2.65 (t,  $J = 12.3$  Hz, 1H), 2.22 (dd,  $J = 12.7, 6.7$  Hz, 1H).  $^{13}\text{C}$  NMR (101 MHz,  $\text{CDCl}_3$ )  $\delta$  180.7, 171.2, 168.8, 142.7, 134.9, 134.8, 134.4, 131.4, 131.1, 127.5, 123.5, 117.9, 115.8, 109.3, 71.7, 53.2, 52.3, 48.2, 43.1, 41.9, 26.4. HRMS (ESI)  $m/z$ : calculated for  $\text{C}_{25}\text{H}_{21}\text{N}_2\text{O}_5\text{NaBr}$   $[\text{M}+\text{Na}]^+$ : 531.0532, found: 531.0534.

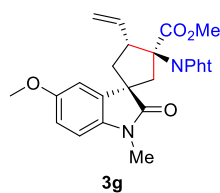

**Methyl (1*S*,3*S*,4*R*)-3-(1,3-dioxisoindolin-2-yl)-5'-methoxy-1'-methyl-2'-oxo-4-vinylspiro[cyclopentane-1,3'-indoline]-3-carboxylate 3g:** Yellow solid, 18 mg, 20% yield, 90% ee;  $[\alpha]_{\text{D}}^{25} = -24.44$  ( $c = 0.50$ ,  $\text{CH}_2\text{Cl}_2$ ), m.p. 89.6 - 91.7 °C. The ee was determined by chiral HPLC (Chiralcel AD-H, Hexane/*i*-PrOH = 85/15, flow rate 1.5 mL/min,  $\lambda = 254$  nm,  $t_{(1*S*,2*R*,4*R*)-3g} = 13.8$  min (major),  $t_{(1*R*,2*S*,4*S*)-3g} = 20.4$  min (minor)).  $^1\text{H}$  NMR (400 MHz,  $\text{CDCl}_3$ )  $\delta$  7.93 - 7.75 (m, 2H), 7.75 - 7.67 (m, 2H), 7.43 (d,  $J = 2.8$  Hz, 1H), 6.88 - 6.74 (m, 1H), 6.69 (d,  $J = 8.5$  Hz, 1H), 6.26 - 5.95 (m, 1H), 5.51 - 5.32 (m, 1H), 5.22 - 5.00 (m, 2H), 3.85 (s, 3H), 3.69 (s, 3H), 3.50 (d,  $J = 15.0$  Hz, 1H), 3.13 (s, 3H), 2.57 - 2.34 (m, 2H), 2.15 (dd,  $J = 12.9, 6.2$  Hz, 1H).  $^{13}\text{C}$  NMR (101 MHz,  $\text{CDCl}_3$ )  $\delta$  181.5, 171.9, 168.5, 156.7, 136.8, 136.0, 134.8, 134.2, 131.9, 123.4, 116.3, 112.8, 110.9, 108.2, 72.5, 56.0, 52.5, 51.5, 48.1, 44.7, 40.6, 26.3. HRMS (ESI)  $m/z$ : calculated for  $\text{C}_{26}\text{H}_{23}\text{N}_2\text{O}_6$   $[\text{M}-\text{H}]^-$ : 459.1556, found: 459.1561.

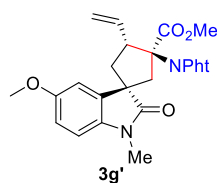

**Methyl (1*R*,3*S*,4*R*)-3-(1,3-dioxisoindolin-2-yl)-5'-methoxy-1'-methyl-2'-oxo-4-vinylspiro[cyclopentane-1,3'-indoline]-3-carboxylate 3g':** Yellow solid, 30 mg, 33% yield, 78% ee;  $[\alpha]_{\text{D}}^{25} = -22.62$  ( $c = 0.50$ ,  $\text{CH}_2\text{Cl}_2$ ), m.p. 75.6 - 76.4 °C. The ee was determined by chiral HPLC

(Chiralcel AD-H, Hexane/*i*-PrOH = 85/15, flow rate 1.5 mL/min,  $\lambda = 254$  nm,  $t_{(1R,2R,4S)\text{-}3g'}$  = 15.9 min (major),  $t_{(1S,2S,4R)\text{-}3g'}$  = 17.8 min (minor)).  $^1\text{H}$  NMR (400 MHz,  $\text{CDCl}_3$ )  $\delta$  7.87 - 7.81 (m, 2H), 7.77 - 7.71 (m, 2H), 6.90 (s, 1H), 6.79 - 6.67 (m, 2H), 6.26 - 6.10 (m, 1H), 5.24 - 5.11 (m, 2H), 5.10 - 5.03 (m, 1H), 3.74 (s, 3H), 3.68 (d,  $J = 15.2$  Hz, 1H), 3.61 (s, 3H), 3.19 (s, 3H), 2.71 - 2.61 (m, 1H), 2.48 (s, 1H), 2.05 - 1.98 (m, 1H).  $^{13}\text{C}$  NMR (101 MHz,  $\text{CDCl}_3$ )  $\delta$  179.0, 170.6, 168.9, 156.1, 137.0, 136.3, 135.6, 134.5, 131.7, 123.5, 117.3, 112.5, 110.0, 108.5, 73.6, 55.6, 52.9, 52.8, 47.3, 46.8, 41.4, 26.7. HRMS (ESI)  $m/z$ : calculated for  $\text{C}_{26}\text{H}_{23}\text{N}_2\text{O}_6$  [M-H] $^-$ : 459.1556, found: 459.1561.

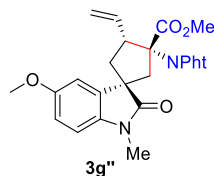

**Methyl (1*S*,3*R*,4*R*)-3-(1,3-dioxisoindolin-2-yl)-5'-methoxy-1'-methyl-2'-oxo-4-vinylspiro[cyclopentane-1,3'-indoline]-3-carboxylate 3g''**: Yellow solid, 18 mg, 20% yield, 83% ee;  $[\alpha]_D^{25} = +36.26$  ( $c = 0.50$ ,  $\text{CH}_2\text{Cl}_2$ ), m.p. 86.4 - 87.7 °C. The ee was determined by chiral HPLC (Chiralcel AD-H, Hexane/*i*-PrOH = 85/15, flow rate 1.5 mL/min,  $\lambda = 254$  nm,  $t_{(1S,2R,4S)\text{-}3g''}$  = 9.2 min (minor),  $t_{(1R,2S,4R)\text{-}3g''}$  = 14.1 min (major)).  $^1\text{H}$  NMR (400 MHz,  $\text{CDCl}_3$ )  $\delta$  7.85 - 7.79 (m, 2H), 7.76 - 7.71 (m, 2H), 7.66 (d,  $J = 2.8$  Hz, 1H), 6.85 - 6.77 (m, 1H), 6.72 - 6.67 (m, 1H), 5.94 - 5.80 (m, 1H), 5.10 (d,  $J = 17.4$  Hz, 1H), 4.96 (d,  $J = 10.5$  Hz, 1H), 4.73 - 4.59 (m, 1H), 3.86 (d,  $J = 4.4$  Hz, 6H), 3.76 - 3.66 (m, 1H), 3.15 (s, 3H), 2.77 (d,  $J = 15.5$  Hz, 1H), 2.67 - 2.59 (m, 1H), 2.29 - 2.21 (m, 1H).  $^{13}\text{C}$  NMR (101 MHz,  $\text{CDCl}_3$ )  $\delta$  181.0, 171.3, 168.8, 156.6, 137.2, 135.2, 134.3, 134.2, 131.5, 123.4, 117.7, 112.3, 111.8, 108.0, 71.9, 56.0, 53.1, 52.5, 48.4, 43.3, 42.1, 26.4. HRMS (ESI)  $m/z$ : calculated for  $\text{C}_{26}\text{H}_{23}\text{N}_2\text{O}_6$  [M-H] $^-$ : 459.1556, found: 459.1561.

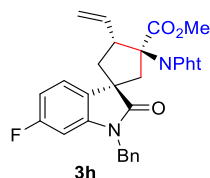

**Methyl (1*S*,3*S*,4*R*)-1'-benzyl-3-(1,3-dioxisoindolin-2-yl)-6'-fluoro-2'-oxo-4-vinylspiro[cyclopentane-1,3'-indoline]-3-carboxylate 3h**: White solid, 43.6 mg, 42% yield, 93% ee;  $[\alpha]_D^{25} = +1.35$  ( $c = 1.00$ ,  $\text{CH}_2\text{Cl}_2$ ), m.p. 149.7 - 150.6 °C. The ee was determined by chiral HPLC (Chiralcel AD-H, Hexane/*i*-PrOH = 85/15, flow rate 1.5 mL/min,  $\lambda = 254$  nm,  $t_{(1S,2R,4R)\text{-}3h}$  = 10.5 min (major),  $t_{(1R,2S,4S)\text{-}3h}$  = 15.1 min (minor)).  $^1\text{H}$  NMR (400 MHz,  $\text{CDCl}_3$ )  $\delta$  7.92 - 7.58 (m, 5H), 7.34 - 7.17 (m, 5H), 6.84 - 6.68 (m, 1H), 6.44 (d,  $J = 8.4$  Hz, 1H), 6.25 - 6.04 (m, 1H), 5.54 - 5.33 (m, 1H), 5.24 - 5.02 (m, 2H), 4.93 - 4.69 (m, 2H), 3.70 (s, 3H), 3.57 (d,  $J = 14.9$  Hz, 1H), 2.66 - 2.38 (m, 2H), 2.29 - 2.09 (m, 1H).  $^{13}\text{C}$  NMR (101 MHz,  $\text{CDCl}_3$ )  $\delta$  182.2, 172.0, 168.4, 162.9 (d,  $J = 244.7$  Hz, 1C), 143.7 (d,  $J = 11.5$  Hz, 1C), 135.8, 135.5, 134.2, 131.8, 128.9, 128.7 (d,  $J = 3.0$  Hz, 1C), 127.8, 127.2, 125.0 (d,  $J = 9.6$  Hz, 1C), 123.4, 116.4, 109.3 (d,  $J = 22.1$  Hz, 1C), 97.6 (d,  $J = 27.7$  Hz, 1C), 72.4, 52.5, 50.6, 48.2, 44.5, 43.8, 40.5. HRMS (ESI)  $m/z$ : calculated for  $\text{C}_{31}\text{H}_{26}\text{N}_2\text{O}_5\text{F}$  [M+H] $^+$ : 471.1332, found: 471.1335.

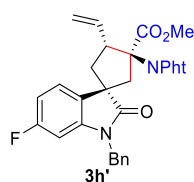

**Methyl (1R,3S,4R)-1'-benzyl-3-(1,3-dioxoisindolin-2-yl)-6'-fluoro-2'-oxo-4-vinylspiro[cyclopentane-1,3'-indoline]-3-carboxylate 3h'**: White solid, 28.4 mg, 27% yield, 83% ee;  $[\alpha]_D^{25} = -6.84$  ( $c = 1.00$ ,  $\text{CH}_2\text{Cl}_2$ ), m.p. 95.2 - 95.8 °C. The ee was determined by chiral HPLC (Chiralcel AD-H, Hexane/*i*-PrOH = 85/15, flow rate 1.5 mL/min,  $\lambda = 254$  nm,  $t_{(1R,2R,4S)-3h'} = 14.1$  min (minor),  $t_{(1S,2S,4R)-3h'} = 19.1$  min (major)).  $^1\text{H}$  NMR (400 MHz,  $\text{CDCl}_3$ )  $\delta$  7.97 - 7.82 (m, 2H), 7.80 - 7.70 (m, 2H), 7.39 - 7.15 (m, 6H), 6.69 - 6.57 (m, 1H), 6.50 - 6.41 (m, 1H), 6.28 - 6.08 (m, 1H), 5.28 - 5.14 (m, 2H), 5.13 - 5.01 (m, 1H), 4.98 - 4.85 (m, 2H), 3.89 - 3.67 (m, 4H), 2.85 - 2.71 (m, 1H), 2.63 - 2.46 (m, 1H), 2.11 - 1.97 (m, 1H).  $^{13}\text{C}$  NMR (101 MHz,  $\text{CDCl}_3$ )  $\delta$  179.7, 170.6, 169.0, 162.7 (d,  $J = 245.0$  Hz, 1C), 143.4 (d,  $J = 11.4$  Hz, 1C), 135.4, 135.3, 134.5, 131.6, 131.3 (d,  $J = 3.0$  Hz, 1C), 129.0, 127.9, 127.3, 123.8 (d,  $J = 9.6$  Hz, 1C), 123.6, 117.4, 108.8 (d,  $J = 22.0$  Hz, 1C), 98.0 (d,  $J = 27.0$  Hz, 1C), 73.3, 52.9, 52.0, 47.7, 46.8, 44.2, 41.6. HRMS (ESI)  $m/z$ : calculated for  $\text{C}_{31}\text{H}_{26}\text{N}_2\text{O}_5\text{F}$   $[\text{M}+\text{H}]^+$ : 471.1332, found: 471.1335.

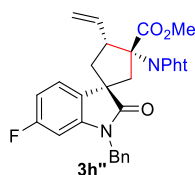

**Methyl (1S,3R,4R)-1'-benzyl-3-(1,3-dioxoisindolin-2-yl)-6'-fluoro-2'-oxo-4-vinylspiro[cyclopentane-1,3'-indoline]-3-carboxylate 3h''**: White solid, 17.6 mg, 17% yield, 78% ee;  $[\alpha]_D^{25} = +60.13$  ( $c = 1.00$ ,  $\text{CH}_2\text{Cl}_2$ ), m.p. 109.0 - 109.7 °C. The ee was determined by chiral HPLC (Chiralcel AD-H, Hexane/*i*-PrOH = 85/15, flow rate 1.5 mL/min,  $\lambda = 254$  nm,  $t_{(1S,2R,4S)-3h''} = 9.7$  min (minor),  $t_{(1R,2S,4R)-3h''} = 12.5$  min (major)).  $^1\text{H}$  NMR (400 MHz,  $\text{CDCl}_3$ )  $\delta$  7.97 - 7.55 (m, 4H), 7.42 - 7.15 (m, 6H), 6.78 - 6.57 (m, 1H), 6.51 - 6.23 (m, 2H), 5.08 (d,  $J = 16.9$  Hz, 1H), 5.02 - 4.74 (m, 3H), 4.31 (d,  $J = 15.1$  Hz, 1H), 4.20 - 4.04 (m, 1H), 3.79 (s, 3H), 2.83 - 2.60 (m, 2H), 2.55 - 2.42 (m, 1H).  $^{13}\text{C}$  NMR (101 MHz,  $\text{CDCl}_3$ )  $\delta$  181.6, 172.8, 168.6, 162.7 (d,  $J = 244.8$  Hz, 1C), 143.7 (d,  $J = 11.4$  Hz, 1C), 136.2, 135.5, 134.3, 131.7, 131.0 (d,  $J = 2.9$  Hz, 1C), 129.0, 127.9, 127.4, 124.6 (d,  $J = 9.8$  Hz, 1C), 123.4, 117.9, 109.1 (d,  $J = 22.1$  Hz, 1C), 97.7 (d,  $J = 27.5$  Hz, 1C), 72.5, 53.2, 51.9, 51.8, 44.3, 44.0, 43.0. HRMS (ESI)  $m/z$ : calculated for  $\text{C}_{31}\text{H}_{26}\text{N}_2\text{O}_5\text{F}$   $[\text{M}+\text{H}]^+$ : 471.1332, found: 471.1335.

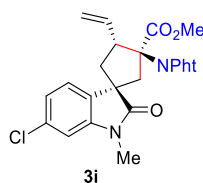

**Methyl (1S,3S,4R)-6'-chloro-3-(1,3-dioxoisindolin-2-yl)-1'-methyl-2'-oxo-4-vinylspiro[cyclopentane-1,3'-indoline]-3-carboxylate 3i**: White solid, 6.9 mg, 40% yield, 90% ee;  $[\alpha]_D^{25} = -14.8$  ( $c = 0.50$ ,  $\text{CH}_2\text{Cl}_2$ ), m.p. 231.8 - 232.6 °C. The ee was determined by chiral HPLC (Chiralcel AD-H, Hexane/*i*-PrOH = 85/15, flow rate 1.5 mL/min,  $\lambda = 254$  nm,  $t_{(1S,2R,4R)-3i} = 12.2$  min (major),  $t_{(1R,2S,4S)-3i} = 16.3$  min (minor)).  $^1\text{H}$  NMR (400 MHz,  $\text{CDCl}_3$ )  $\delta$  7.89 - 7.77 (m, 2H), 7.76 - 7.65 (m, 3H), 7.14 - 7.02 (m, 1H), 6.78 (d,  $J = 2.0$  Hz, 1H), 6.20 - 6.01 (m, 1H), 5.44 - 5.33 (m, 1H), 5.17 - 5.05 (m, 2H), 3.68 (s, 3H), 3.48 (d,  $J = 15.0$  Hz, 1H), 3.13 (s, 3H), 2.48 - 2.35 (m, 2H), 2.18 - 2.08 (m, 1H).  $^{13}\text{C}$  NMR (101 MHz,  $\text{CDCl}_3$ )  $\delta$  181.7, 172.0, 168.4, 144.5, 135.8, 134.2, 133.9, 131.8, 124.8, 123.4, 123.0, 116.5, 108.6, 72.4, 52.6, 50.7, 48.0, 44.5, 40.3, 26.4. HRMS (ESI)  $m/z$ : calculated for  $\text{C}_{25}\text{H}_{21}\text{N}_2\text{O}_5\text{NaCl}$   $[\text{M}+\text{Na}]^+$ : 487.1037, found: 487.1040.

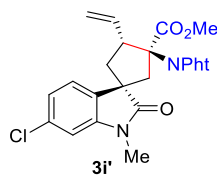

**Methyl (1R,3S,4R)-6'-chloro-3-(1,3-dioxoisindolin-2-yl)-1'-methyl-2'-oxo-4-vinylspiro[cyclopentane-1,3'-indoline]-3-carboxylate 3i'**: White solid, 24.6 mg, 27% yield, 82% ee;  $[\alpha]_D^{25} = -7.26$  ( $c = 0.50$ ,  $\text{CH}_2\text{Cl}_2$ ), m.p. 95.4 - 96.7 °C. The ee was determined by chiral HPLC (Chiralcel AD-H, Hexane/*i*-PrOH = 85/15, flow rate 1.5 mL/min,  $\lambda = 254$  nm,  $t_{(1R,2R,4S)-3i'} = 14.9$  min (minor),  $t_{(1S,2S,4R)-3i'} = 17.4$  min (major)).  $^1\text{H NMR}$  (400 MHz,  $\text{CDCl}_3$ )  $\delta$  7.90 - 7.70 (m, 4H), 7.18 (d,  $J = 7.9$  Hz, 1H), 7.03 - 6.89 (m, 1H), 6.81 (d,  $J = 2.1$  Hz, 1H), 6.30 - 6.03 (m, 1H), 5.24 - 5.08 (m, 2H), 5.03 - 4.94 (m, 1H), 3.75 (s, 3H), 3.67 (d,  $J = 15.2$  Hz, 1H), 3.21 (s, 3H), 2.74 - 2.63 (m, 1H), 2.55 - 2.43 (m, 1H), 1.99 - 1.92 (m, 1H).  $^{13}\text{C NMR}$  (101 MHz,  $\text{CDCl}_3$ )  $\delta$  179.2, 170.6, 169.0, 144.1, 135.3, 134.5, 134.2, 133.9, 131.7, 123.7, 123.6, 122.5, 117.4, 108.9, 73.2, 52.9, 52.1, 47.4, 46.9, 41.3, 26.7. HRMS (ESI)  $m/z$ : calculated for  $\text{C}_{25}\text{H}_{21}\text{N}_2\text{O}_5\text{NaCl}$   $[\text{M}+\text{Na}]^+$ : 487.1037, found: 487.1040.

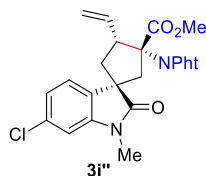

**Methyl (1S,3R,4R)-6'-chloro-3-(1,3-dioxoisindolin-2-yl)-1'-methyl-2'-oxo-4-vinylspiro[cyclopentane-1,3'-indoline]-3-carboxylate 3i''**: White solid, 12.3mg, 13% yield, 81% ee;  $[\alpha]_D^{25} = +40.37$  ( $c = 0.50$ ,  $\text{CH}_2\text{Cl}_2$ ), m.p. 89.5 - 90.0 °C. The ee was determined by chiral HPLC (Chiralcel AD-H, Hexane/*i*-PrOH = 85/15, flow rate 1.5 mL/min,  $\lambda = 254$  nm,  $t_{(1S,2R,4S)-3i''} = 8.4$  min (minor),  $t_{(1R,2S,4R)-3i''} = 11.7$  min (major)).  $^1\text{H NMR}$  (400 MHz,  $\text{CDCl}_3$ )  $\delta$  7.91 (d,  $J = 8.0$  Hz, 1H), 7.87 - 7.80 (m, 2H), 7.78 - 7.70 (m, 2H), 7.13 - 7.08 (m, 1H), 6.80 (d,  $J = 2.1$  Hz, 1H), 5.91 - 5.79 (m, 1H), 5.13 - 5.06 (m, 1H), 5.00 - 4.93 (m, 1H), 4.71 - 4.60 (m, 1H), 3.87 (s, 3H), 3.70 (d,  $J = 15.4$  Hz, 1H), 3.16 (s, 3H), 2.73 (d,  $J = 15.5$  Hz, 1H), 2.68 - 2.59 (m, 1H), 2.25 - 2.17 (m, 1H).  $^{13}\text{C NMR}$  (101 MHz,  $\text{CDCl}_3$ )  $\delta$  181.2, 171.2, 168.9, 144.8, 134.9, 134.5, 134.0, 131.4, 131.0, 125.2, 123.4, 122.9, 117.8, 108.5, 71.8, 53.2, 51.9, 48.2, 43.1, 41.9, 26.4. HRMS (ESI)  $m/z$ : calculated for  $\text{C}_{25}\text{H}_{21}\text{N}_2\text{O}_5\text{NaCl}$   $[\text{M}+\text{Na}]^+$ : 487.1037, found: 487.1040.

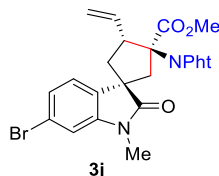

**Methyl (1S,3S,4R)-6'-bromo-3-(1,3-dioxoisindolin-2-yl)-1'-methyl-2'-oxo-4-vinylspiro[cyclopentane-1,3'-indoline]-3-carboxylate 3j**: White solid, 38.6 mg, 38% yield, 90% ee;  $[\alpha]_D^{25} = -9.59$  ( $c = 0.50$ ,  $\text{CH}_2\text{Cl}_2$ ), m.p. 159.2 - 160.4 °C. The ee was determined by chiral HPLC (Chiralcel AD-H, Hexane/*i*-PrOH = 85/15, flow rate 1.5 mL/min,  $\lambda = 254$  nm,  $t_{(1S,2R,4R)-3j} = 11.8$  min (major),  $t_{(1R,2S,4S)-3j} = 16.5$  min (minor)).  $^1\text{H NMR}$  (400 MHz,  $\text{CDCl}_3$ )  $\delta$  7.86 - 7.77 (m, 2H), 7.74 - 7.67 (m, 2H), 7.64 (d,  $J = 7.9$  Hz, 1H), 7.23 (d,  $J = 7.9$  Hz, 1H), 6.93 (s, 1H), 6.17 - 5.99 (m, 1H), 5.43 - 5.33 (m, 1H), 5.17 - 5.06 (m, 2H), 3.67 (s, 3H), 3.47 (d,  $J = 14.9$  Hz, 1H), 3.12 (s, 3H), 2.49

- 2.36 (m, 2H), 2.11 (dd,  $J = 13.0, 6.3$  Hz, 1H).  $^{13}\text{C}$  NMR (101 MHz,  $\text{CDCl}_3$ )  $\delta$  181.5, 172.0, 168.3, 144.6, 135.7, 134.2, 132.3, 131.7, 125.9, 125.2, 123.4, 121.6, 116.4, 111.3, 72.3, 52.5, 50.7, 47.9, 44.5, 40.2, 26.4. HRMS (ESI)  $m/z$ : calculated for  $\text{C}_{25}\text{H}_{21}\text{N}_2\text{O}_5\text{NaBr}$   $[\text{M}+\text{Na}]^+$ : 531.0532, found: 531.0535.

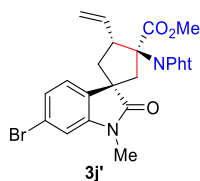

**Methyl (1R,3S,4R)-6'-bromo-3-(1,3-dioxoisindolin-2-yl)-1'-methyl-2'-oxo-4-vinylspiro[cyclopentane-1,3'-indoline]-3-carboxylate 3j'**: White solid, 25.7 mg, 25% yield, 82% ee;  $[\alpha]_{\text{D}}^{25} = -5.37$  ( $c = 0.50$ ,  $\text{CH}_2\text{Cl}_2$ ), m.p. 85.5 - 86.7 °C. The ee was determined by chiral HPLC (Chiralcel AD-H, Hexane/*i*-PrOH = 85/15, flow rate 1.5 mL/min,  $\lambda = 254$  nm,  $t_{(1R,2R,4S)-3j'} = 15.9$  min (minor),  $t_{(1S,2S,4R)-3j'} = 17.8$  min (major)).  $^1\text{H}$  NMR (400 MHz,  $\text{CDCl}_3$ )  $\delta$  7.87 - 7.81 (m, 2H), 7.78 - 7.73 (m, 2H), 7.15 - 7.06 (m, 2H), 6.95 (s, 1H), 6.22 - 6.08 (m, 1H), 5.22 - 5.11 (m, 2H), 5.02 - 4.94 (m, 1H), 3.74 (s, 3H), 3.66 (d,  $J = 15.3$  Hz, 1H), 3.20 (s, 3H), 2.73 - 2.63 (m, 1H), 2.48 (d,  $J = 15.1$  Hz, 1H), 1.98 - 1.92 (m, 1H).  $^{13}\text{C}$  NMR (101 MHz,  $\text{CDCl}_3$ )  $\delta$  179.1, 170.5, 168.9, 144.2, 135.3, 134.7, 134.5, 131.6, 125.5, 124.0, 123.6, 121.6, 117.4, 111.6, 73.2, 52.9, 52.1, 47.3, 46.9, 41.2, 26.7. HRMS (ESI)  $m/z$ : calculated for  $\text{C}_{25}\text{H}_{21}\text{N}_2\text{O}_5\text{NaBr}$   $[\text{M}+\text{Na}]^+$ : 531.0532, found: 531.0535.

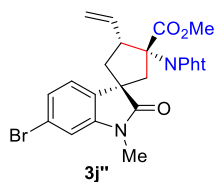

**Methyl (1S,3R,4R)-6'-bromo-3-(1,3-dioxoisindolin-2-yl)-1'-methyl-2'-oxo-4-vinylspiro[cyclopentane-1,3'-indoline]-3-carboxylate 3j''**: White solid, 12.9 mg, 13% yield, 79% ee;  $[\alpha]_{\text{D}}^{25} = +67.62$  ( $c = 0.50$ ,  $\text{CH}_2\text{Cl}_2$ ), m.p. 105.9 - 106.8 °C. The ee was determined by chiral HPLC (Chiralcel AD-H, Hexane/*i*-PrOH = 85/15, flow rate 1.5 mL/min,  $\lambda = 254$  nm,  $t_{(1S,2R,4S)-3j''} = 8.7$  min (minor),  $t_{(1R,2S,4R)-3j''} = 11.7$  min (major)).  $^1\text{H}$  NMR (400 MHz,  $\text{CDCl}_3$ )  $\delta$  7.90 - 7.82 (m, 3H), 7.79 - 7.73 (m, 2H), 7.27 (d,  $J = 7.9$  Hz, 1H), 6.96 (s, 1H), 5.96 - 5.79 (m, 1H), 5.11 (d,  $J = 17.3$  Hz, 1H), 4.97 (d,  $J = 10.5$  Hz, 1H), 4.73 - 4.60 (m, 1H), 3.88 (s, 3H), 3.71 (d,  $J = 15.2$  Hz, 1H), 3.17 (s, 3H), 2.74 (d,  $J = 15.5$  Hz, 1H), 2.69 - 2.60 (m, 1H), 2.26 - 2.18 (m, 1H).  $^{13}\text{C}$  NMR (101 MHz,  $\text{CDCl}_3$ )  $\delta$  181.1, 171.1, 168.9, 144.9, 134.9, 134.4, 131.5, 131.3, 125.9, 125.5, 123.4, 121.8, 117.8, 111.3, 71.7, 53.2, 51.9, 48.2, 43.0, 41.8, 26.4. HRMS (ESI)  $m/z$ : calculated for  $\text{C}_{25}\text{H}_{21}\text{N}_2\text{O}_5\text{NaBr}$   $[\text{M}+\text{Na}]^+$ : 531.0532, found: 531.0535.

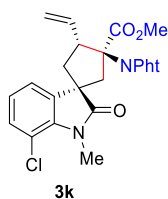

**Methyl (1S,3S,4R)-7'-chloro-3-(1,3-dioxoisindolin-2-yl)-1'-methyl-2'-oxo-4-vinylspiro[cyclopentane-1,3'-indoline]-3-carboxylate 3k**: White solid, 38.6 mg, 42% yield, 92% ee;  $[\alpha]_{\text{D}}^{25} = -1.79$  ( $c = 0.50$ ,  $\text{CH}_2\text{Cl}_2$ ), m.p. 89.0 - 89.7 °C. The ee was determined by chiral HPLC (Chiralcel AD-H, Hexane/*i*-PrOH = 90/10, flow rate 1.0 mL/min,  $\lambda = 254$  nm,  $t_{(1S,2R,4R)-3k} = 17.2$

min (major),  $t_{(1R,2S,4S)-3k} = 31.5$  min (minor)).  $^1\text{H NMR}$  (400 MHz,  $\text{CDCl}_3$ )  $\delta$  7.87 - 7.76 (m, 2H), 7.76 - 7.56 (m, 3H), 7.17 (d,  $J = 8.2$  Hz, 1H), 7.02 (t,  $J = 7.7$  Hz, 1H), 6.19 - 6.04 (m, 1H), 5.50 - 5.36 (m, 1H), 5.23 - 5.02 (m, 2H), 3.68 (s, 3H), 3.60 - 3.40 (m, 4H), 2.58 - 2.29 (m, 2H), 2.20 - 2.05 (m, 1H).  $^{13}\text{C NMR}$  (101 MHz,  $\text{CDCl}_3$ )  $\delta$  181.9, 172.1, 168.4, 139.1, 136.2, 135.7, 134.2, 131.8, 130.4, 124.0, 123.4, 122.4, 116.4, 115.1, 72.3, 52.6, 50.8, 48.5, 44.5, 40.8, 29.6. HRMS (ESI)  $m/z$ : calculated for  $\text{C}_{25}\text{H}_{21}\text{N}_2\text{O}_5\text{NaCl}$   $[\text{M}+\text{Na}]^+$ : 487.1037, found: 487.1039.

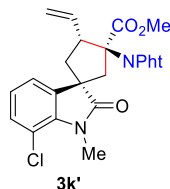

**Methyl (1R,3S,4R)-7'-chloro-3-(1,3-dioxoisindolin-2-yl)-1'-methyl-2'-oxo-4-vinylspiro[cyclopentane-1,3'-indoline]-3-carboxylate 3k'**: White solid, 25.7 mg, 28% yield, 81% ee;  $[\alpha]_{\text{D}}^{25} = -17.26$  ( $c = 0.50$ ,  $\text{CH}_2\text{Cl}_2$ ), m.p. 77.8 - 78.4 °C. The ee was determined by chiral HPLC (Chiralcel IF, Hexane/*i*-PrOH = 85/15, flow rate 1.5 mL/min,  $\lambda = 254$  nm,  $t_{(1R,2R,4S)-3k'} = 18.7$  min (minor),  $t_{(1S,2S,4R)-3k'} = 52.4$  min (major)).  $^1\text{H NMR}$  (400 MHz,  $\text{CDCl}_3$ )  $\delta$  7.89 - 7.80 (m, 2H), 7.80 - 7.71 (m, 2H), 7.22 - 7.08 (m, 2H), 6.88 (t,  $J = 7.8$  Hz, 1H), 6.27 - 6.07 (m, 1H), 5.21 - 5.05 (m, 2H), 5.01 - 4.87 (m, 1H), 3.76 (s, 3H), 3.69 - 3.51 (m, 4H), 2.69 (t,  $J = 12.6$  Hz, 1H), 2.56 (d,  $J = 15.3$  Hz, 1H), 1.97 (dd,  $J = 12.6, 6.3$  Hz, 1H).  $^{13}\text{C NMR}$  (101 MHz,  $\text{CDCl}_3$ )  $\delta$  179.7, 170.5, 168.9, 138.8, 138.7, 135.3, 134.5, 131.7, 130.4, 123.7, 123.6, 121.2, 117.4, 115.6, 73.3, 52.9, 52.1, 47.5, 47.0, 41.9, 30.1. HRMS (ESI)  $m/z$ : calculated for  $\text{C}_{25}\text{H}_{21}\text{N}_2\text{O}_5\text{NaCl}$   $[\text{M}+\text{Na}]^+$ : 487.1037, found: 487.1039.

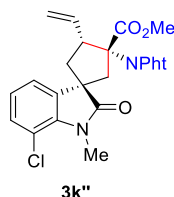

**Methyl (1S,3R,4R)-7'-chloro-3-(1,3-dioxoisindolin-2-yl)-1'-methyl-2'-oxo-4-vinylspiro[cyclopentane-1,3'-indoline]-3-carboxylate 3k''**: White solid, 12.9 mg, 14% yield, 73% ee;  $[\alpha]_{\text{D}}^{25} = +52.00$  ( $c = 0.50$ ,  $\text{CH}_2\text{Cl}_2$ ), m.p. 75.2 - 76.1 °C. The ee was determined by chiral HPLC (Chiralcel IF, Hexane/*i*-PrOH = 90/10, flow rate 1.0 mL/min,  $\lambda = 254$  nm,  $t_{(1S,2R,4S)-3k''} = 28.8$  min (major),  $t_{(1R,2S,4R)-3k''} = 30.3$  min (minor)).  $^1\text{H NMR}$  (400 MHz,  $\text{CDCl}_3$ )  $\delta$  7.88 (d,  $J = 7.2$  Hz, 1H), 7.85 - 7.79 (m, 2H), 7.77 - 7.71 (m, 2H), 7.20 (d,  $J = 8.0$  Hz, 1H), 7.05 (t,  $J = 7.7$  Hz, 1H), 5.92 - 5.76 (m, 1H), 5.11 (d,  $J = 17.4$  Hz, 1H), 4.97 (d,  $J = 10.5$  Hz, 1H), 4.72 - 4.58 (m, 1H), 3.88 (s, 3H), 3.68 (d,  $J = 15.4$  Hz, 1H), 3.55 (s, 3H), 2.77 (d,  $J = 15.4$  Hz, 1H), 2.69 - 2.60 (m, 1H), 2.28 - 2.19 (m, 1H).  $^{13}\text{C NMR}$  (101 MHz,  $\text{CDCl}_3$ )  $\delta$  181.4, 171.2, 168.9, 139.4, 135.5, 134.9, 134.4, 131.4, 130.5, 123.9, 123.4, 122.6, 118.0, 115.2, 71.8, 53.2, 52.0, 48.1, 43.4, 42.4, 29.7. HRMS (ESI)  $m/z$ : calculated for  $\text{C}_{25}\text{H}_{21}\text{N}_2\text{O}_5\text{NaCl}$   $[\text{M}+\text{Na}]^+$ : 487.1037, found: 487.1039.

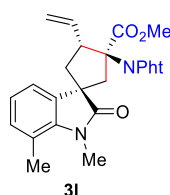

**Methyl (1S,3S,4R)-3-(1,3-dioxoisindolin-2-yl)-1',7'-dimethyl-2'-oxo-4-vinylspiro[cyclopentane-1,3'-indoline]-3-carboxylate 3l**: Yellow solid, 32 mg, 36% yield, 92%

ee;  $[\alpha]_D^{25} = -5.02$  ( $c = 0.50$ ,  $\text{CH}_2\text{Cl}_2$ ), m.p. 92.8 - 93.2 °C. The ee was determined by chiral HPLC (Chiralcel AD-H, Hexane/*i*-PrOH = 85/15, flow rate 1.5 mL/min,  $\lambda = 254$  nm,  $t_{(1S,2R,4R)-3I} = 12.5$  min (major),  $t_{(1R,2S,4S)-3I} = 19.1$  min (minor)).  $^1\text{H NMR}$  (400 MHz,  $\text{CDCl}_3$ )  $\delta$  7.85 - 7.79 (m, 2H), 7.76 - 7.65 (m, 2H), 7.63 (dd,  $J = 6.7, 2.2$  Hz, 1H), 7.05 - 6.96 (m, 2H), 6.20 - 6.06 (m, 1H), 5.51 - 5.41 (m, 1H), 5.17 - 5.08 (m, 2H), 3.70 (s, 3H), 3.51 (d,  $J = 15.1$  Hz, 1H), 3.44 (s, 3H), 2.56 (s, 3H), 2.51 - 2.39 (m, 2H), 2.12 (dd,  $J = 12.9, 6.1$  Hz, 1H).  $^{13}\text{C NMR}$  (101 MHz,  $\text{CDCl}_3$ )  $\delta$  182.5, 172.1, 168.5, 141.0, 136.0, 134.1, 134.0, 131.9, 123.4, 123.2, 121.7, 119.4, 116.3, 72.5, 52.5, 50.6, 48.6, 44.5, 40.9, 29.6, 19.0. HRMS (ESI)  $m/z$ : calculated for  $\text{C}_{26}\text{H}_{24}\text{N}_2\text{O}_5\text{Na}$   $[\text{M}+\text{Na}]^+$ : 467.1583, found: 467.1588.

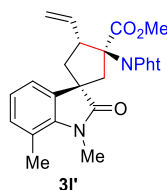

**Methyl (1R,3S,4R)-3-(1,3-dioxoisindolin-2-yl)-1',7'-dimethyl-2'-oxo-4-vinylspiro[cyclopentane-1,3'-indoline]-3-carboxylate 3I'**: Yellow solid, 24 mg, 27% yield, 80% ee;  $[\alpha]_D^{25} = -8.91$  ( $c = 0.50$ ,  $\text{CH}_2\text{Cl}_2$ ), m.p. 80.3 - 81.0 °C. The ee was determined by chiral HPLC (Chiralcel AD-H, Hexane/*i*-PrOH = 85/15, flow rate 1.5 mL/min,  $\lambda = 254$  nm,  $t_{(1R,2R,4S)-3I'} = 13.0$  min (major),  $t_{(1S,2S,4R)-3I'} = 14.9$  min (minor)).  $^1\text{H NMR}$  (400 MHz,  $\text{CDCl}_3$ )  $\delta$  7.90 - 7.80 (m, 2H), 7.78 - 7.71 (m, 2H), 7.12 (d,  $J = 7.3$  Hz, 1H), 6.95 (d,  $J = 7.7$  Hz, 1H), 6.90 - 6.79 (m, 1H), 6.28 - 6.10 (m, 1H), 5.21 - 5.08 (m, 2H), 5.01 - 4.92 (m, 1H), 3.76 (s, 3H), 3.66 (d,  $J = 15.2$  Hz, 1H), 3.52 (s, 3H), 2.69 (t,  $J = 12.5$  Hz, 1H), 2.56 (s, 4H), 1.97 (dd,  $J = 12.2, 6.0$  Hz, 1H).  $^{13}\text{C NMR}$  (101 MHz,  $\text{CDCl}_3$ )  $\delta$  180.2, 170.7, 169.0, 140.5, 136.8, 135.7, 134.4, 131.8, 131.7, 123.5, 122.8, 120.6, 119.8, 117.2, 73.5, 52.8, 51.7, 47.6, 47.0, 41.9, 30.0, 19.3. HRMS (ESI)  $m/z$ : calculated for  $\text{C}_{26}\text{H}_{24}\text{N}_2\text{O}_5\text{Na}$   $[\text{M}+\text{Na}]^+$ : 467.1583, found: 467.1588.

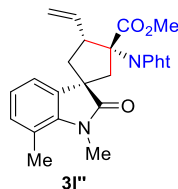

**Methyl (1S,3R,4R)-3-(1,3-dioxoisindolin-2-yl)-1',7'-dimethyl-2'-oxo-4-vinylspiro[cyclopentane-1,3'-indoline]-3-carboxylate 3I''**: Yellow solid, 24 mg, 27% yield, 86% ee;  $[\alpha]_D^{25} = +78.42$  ( $c = 0.50$ ,  $\text{CH}_2\text{Cl}_2$ ), m.p. 90.1 - 90.7 °C. The ee was determined by chiral HPLC (Chiralcel AD-H, Hexane/*i*-PrOH = 85/15, flow rate 1.5 mL/min,  $\lambda = 254$  nm,  $t_{(1S,2R,4S)-3I''} = 9.4$  min (minor),  $t_{(1R,2S,4R)-3I''} = 11.4$  min (major)).  $^1\text{H NMR}$  (400 MHz,  $\text{CDCl}_3$ )  $\delta$  7.85 - 7.71 (m, 5H), 7.06 - 6.98 (m, 2H), 5.96 - 5.79 (m, 1H), 5.12 (d,  $J = 17.8$  Hz, 1H), 4.96 (d,  $J = 10.5$  Hz, 1H), 4.73 - 4.55 (m, 1H), 3.88 (s, 3H), 3.68 (d,  $J = 15.4$  Hz, 1H), 3.46 (s, 3H), 2.77 (d,  $J = 15.3$  Hz, 1H), 2.63 (t,  $J = 12.3$  Hz, 1H), 2.57 (s, 3H), 2.30 - 2.18 (m, 1H).  $^{13}\text{C NMR}$  (101 MHz,  $\text{CDCl}_3$ )  $\delta$  181.9, 171.4, 168.8, 141.3, 135.3, 134.4, 133.4, 132.0, 131.4, 123.4, 123.1, 121.9, 119.4, 117.8, 72.0, 53.2, 51.7, 48.2, 43.5, 42.5, 29.7, 19.1. HRMS (ESI)  $m/z$ : calculated for  $\text{C}_{26}\text{H}_{24}\text{N}_2\text{O}_5\text{Na}$   $[\text{M}+\text{Na}]^+$ : 467.1583, found: 467.1588.

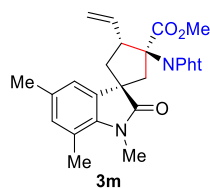

**Methyl (1S,3S,4R)-3-(1,3-dioxoisindolin-2-yl)-1',5',7'-trimethyl-2'-oxo-4-vinylspiro[cyclopentane-1,3'-indoline]-3-carboxylate 3m:** Yellow solid, 30 mg, 33% yield, 94% ee;  $[\alpha]_D^{25} = -21.69$  ( $c = 0.50$ ,  $\text{CH}_2\text{Cl}_2$ ), m.p. 98.0 - 98.9 °C. The ee was determined by chiral HPLC (Chiralcel AD-H, Hexane/*i*-PrOH = 85/15, flow rate 1.5 mL/min,  $\lambda = 254$  nm,  $t_{(1S,2R,4R)-3m} = 6.7$  min (major),  $t_{(1R,2S,4S)-3m} = 8.4$  min (minor)).  $^1\text{H NMR}$  (400 MHz,  $\text{CDCl}_3$ )  $\delta$  7.89 - 7.78 (m, 2H), 7.76 - 7.66 (m, 2H), 7.42 (s, 1H), 6.81 (s, 1H), 6.22 - 6.03 (m, 1H), 5.57 - 5.40 (m, 1H), 5.21 - 5.04 (m, 2H), 3.69 (s, 3H), 3.50 (d,  $J = 15.0$  Hz, 1H), 3.41 (s, 3H), 2.51 (s, 3H), 2.50 - 2.38 (m, 2H), 2.34 (s, 3H), 2.10 (dd,  $J = 12.8, 6.1$  Hz, 1H).  $^{13}\text{C NMR}$  (101 MHz,  $\text{CDCl}_3$ )  $\delta$  182.4, 172.2, 168.5, 138.6, 136.1, 134.1, 134.0, 132.7, 132.3, 131.9, 123.4, 122.2, 119.1, 116.2, 72.5, 52.5, 50.7, 48.6, 44.4, 40.9, 29.5, 21.0, 18.8. HRMS (ESI)  $m/z$ : calculated for  $\text{C}_{27}\text{H}_{26}\text{N}_2\text{O}_5\text{Na}$   $[\text{M}+\text{Na}]^+$ : 481.1739, found: 481.1740.

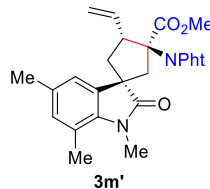

**Methyl (1R,3S,4R)-3-(1,3-dioxoisindolin-2-yl)-1',5',7'-trimethyl-2'-oxo-4-vinylspiro[cyclopentane-1,3'-indoline]-3-carboxylate 3m':** White solid, 26.7 mg, 29% yield, 90% ee;  $[\alpha]_D^{25} = -18.31$  ( $c = 0.50$ ,  $\text{CH}_2\text{Cl}_2$ ), m.p. 73.2 - 74.4 °C. The ee was determined by chiral HPLC (Chiralcel IF, Hexane/*i*-PrOH = 85/15, flow rate 1.5 mL/min,  $\lambda = 254$  nm,  $t_{(1R,2R,4S)-3m'} = 17.8$  min (minor),  $t_{(1S,2S,4R)-3m'} = 18.9$  min (major)).  $^1\text{H NMR}$  (400 MHz,  $\text{CDCl}_3$ )  $\delta$  7.90 - 7.82 (m, 2H), 7.78 - 7.72 (m, 2H), 6.87 (s, 1H), 6.75 (s, 1H), 6.29 - 6.15 (m, 1H), 5.20 - 5.09 (m, 2H), 4.99 - 4.92 (m, 1H), 3.76 (s, 3H), 3.62 (d,  $J = 15.1$  Hz, 1H), 3.48 (s, 3H), 2.65 (t,  $J = 12.2$  Hz, 1H), 2.56 (d,  $J = 15.0$  Hz, 1H), 2.51 (s, 3H), 2.13 (s, 3H), 2.00 (dd,  $J = 12.6, 6.4$  Hz, 1H).  $^{13}\text{C NMR}$  (101 MHz,  $\text{CDCl}_3$ )  $\delta$  180.3, 170.7, 168.9, 138.1, 136.9, 135.8, 134.4, 132.2, 132.1, 131.7, 123.5, 121.4, 119.4, 117.2, 73.8, 52.8, 51.8, 47.4, 47.2, 42.0, 30.0, 20.9, 19.1. HRMS (ESI)  $m/z$ : calculated for  $\text{C}_{27}\text{H}_{26}\text{N}_2\text{O}_5\text{Na}$   $[\text{M}+\text{Na}]^+$ : 481.1739, found: 481.1740.

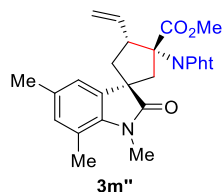

**Methyl (1S,3R,4R)-3-(1,3-dioxoisindolin-2-yl)-1',5',7'-trimethyl-2'-oxo-4-vinylspiro[cyclopentane-1,3'-indoline]-3-carboxylate 3m'':** White solid, 20 mg, 22% yield, 76% ee;  $[\alpha]_D^{25} = +64.75$  ( $c = 0.50$ ,  $\text{CH}_2\text{Cl}_2$ ), m.p. 75.8 - 76.4 °C. The ee was determined by chiral HPLC (Chiralcel IF, Hexane/*i*-PrOH = 85/15, flow rate 1.5 mL/min,  $\lambda = 254$  nm,  $t_{(1S,2R,4S)-3m''} = 22.8$  min (minor),  $t_{(1R,2S,4R)-3m''} = 56.6$  min (major)).  $^1\text{H NMR}$  (400 MHz,  $\text{CDCl}_3$ )  $\delta$  7.87 - 7.81 (m, 2H), 7.76 - 7.70 (m, 2H), 7.55 (s, 1H), 6.82 (s, 1H), 5.94 - 5.79 (m, 1H), 5.12 (d,  $J = 17.2$  Hz, 1H), 4.96 (d,  $J = 10.5$  Hz, 1H), 4.67 - 4.56 (m, 1H), 3.89 (s, 3H), 3.68 - 3.60 (m, 1H), 3.43 (s, 3H), 2.78 (d,  $J = 15.3$

Hz, 1H), 2.61 (t,  $J = 12.2$  Hz, 1H), 2.52 (s, 3H), 2.35 (s, 3H), 2.24 (dd,  $J = 12.7, 6.9$  Hz, 1H).  $^{13}\text{C}$  NMR (101 MHz,  $\text{CDCl}_3$ )  $\delta$  181.8, 171.4, 168.8, 138.8, 135.4, 134.3, 133.5, 132.5, 132.4, 131.4, 123.4, 122.4, 119.1, 117.8, 72.0, 53.1, 51.7, 48.2, 43.4, 42.5, 29.6, 21.1, 18.9. HRMS (ESI)  $m/z$ : calculated for  $\text{C}_{27}\text{H}_{26}\text{N}_2\text{O}_5\text{Na}$   $[\text{M}+\text{Na}]^+$ : 481.1739, found: 481.1740.

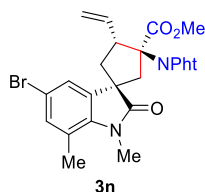

**Methyl (1S,3S,4R)-5'-bromo-3-(1,3-dioxoisindolin-2-yl)-1',7'-dimethyl-2'-oxo-4-vinylspiro[cyclopentane-1,3'-indoline]-3-carboxylate 3n:** White solid, 34.3mg, 33% yield, 99% ee;  $[\alpha]_{\text{D}}^{25} = -37.75$  ( $c = 0.50$ ,  $\text{CH}_2\text{Cl}_2$ ), m.p. 110.1 - 112.2 °C. The ee was determined by chiral HPLC (Chiralcel AD-H, Hexane/*i*-PrOH = 85/15, flow rate 1.5 mL/min,  $\lambda = 254$  nm,  $t_{(1S,2R,4R)-3n} = 12.7$  min (major),  $t_{(1R,2S,4S)-3n} = 22.5$  min (minor)).  $^1\text{H}$  NMR (400 MHz,  $\text{CDCl}_3$ )  $\delta$  7.82 (dd,  $J = 5.5, 3.0$  Hz, 2H), 7.75 (d,  $J = 2.1$  Hz, 1H), 7.71 (dd,  $J = 5.5, 3.0$  Hz, 2H), 7.20 - 7.10 (m, 1H), 6.16 - 6.03 (m, 1H), 5.47 - 5.34 (m, 1H), 5.15 - 5.12 (m, 1H), 5.12 - 5.06 (m, 1H), 3.69 (s, 3H), 3.46 (d,  $J = 15.0$  Hz, 1H), 3.41 (s, 3H), 2.52 (s, 3H), 2.47 - 2.36 (m, 2H), 2.09 (dd,  $J = 12.9, 6.2$  Hz, 1H).  $^{13}\text{C}$  NMR (101 MHz,  $\text{CDCl}_3$ )  $\delta$  181.9, 171.9, 168.4, 140.1, 136.0, 135.7, 134.3, 134.2, 131.8, 124.8, 123.4, 121.4, 116.4, 115.6, 72.3, 52.6, 50.6, 48.4, 44.4, 40.7, 29.6, 18.7. HRMS (ESI)  $m/z$ : calculated for  $\text{C}_{26}\text{H}_{23}\text{N}_2\text{O}_5\text{NaBr}$   $[\text{M}+\text{Na}]^+$ : 545.0688, found: 545.0692.

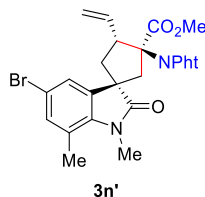

**Methyl (1R,3S,4R)-5'-bromo-3-(1,3-dioxoisindolin-2-yl)-1',7'-dimethyl-2'-oxo-4-vinylspiro[cyclopentane-1,3'-indoline]-3-carboxylate 3n':** White solid, 26.7 mg, 26% yield, 83% ee;  $[\alpha]_{\text{D}}^{25} = -4.93$  ( $c = 0.50$ ,  $\text{CH}_2\text{Cl}_2$ ), m.p. 105.4 - 106.5 °C. The ee was determined by chiral HPLC (Chiralcel AD-H, Hexane/*i*-PrOH = 85/15, flow rate 1.5 mL/min,  $\lambda = 254$  nm,  $t_{(1R,2R,4S)-3n'} = 15.7$  min (major),  $t_{(1S,2S,4R)-3n'} = 17.1$  min (minor)).  $^1\text{H}$  NMR (400 MHz,  $\text{CDCl}_3$ )  $\delta$  7.89 - 7.82 (m, 2H), 7.78 - 7.72 (m, 2H), 7.17 (s, 1H), 7.09 (s, 1H), 6.27 - 6.10 (m, 1H), 5.19 - 5.09 (m, 2H), 4.92 - 4.79 (m, 1H), 3.75 (s, 3H), 3.58 (d,  $J = 15.1$  Hz, 1H), 3.48 (s, 3H), 2.68 - 2.56 (m, 2H), 2.52 (s, 3H), 2.00 (dd,  $J = 12.6, 6.4$  Hz, 1H).  $^{13}\text{C}$  NMR (101 MHz,  $\text{CDCl}_3$ )  $\delta$  179.7, 170.3, 168.8, 139.6, 138.5, 135.4, 134.4, 134.0, 131.5, 123.7, 123.5, 121.6, 117.4, 114.9, 73.4, 52.7, 51.7, 47.2, 46.9, 41.8, 29.9, 18.9. HRMS (ESI)  $m/z$ : calculated for  $\text{C}_{26}\text{H}_{23}\text{N}_2\text{O}_5\text{NaBr}$   $[\text{M}+\text{Na}]^+$ : 545.0688, found: 545.0692.

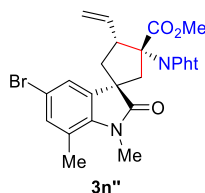

**Methyl (1S,3R,4R)-5'-bromo-3-(1,3-dioxoisindolin-2-yl)-1',7'-dimethyl-2'-oxo-4-vinylspiro[cyclopentane-1,3'-indoline]-3-carboxylate 3n'':** White solid, 15.2 mg, 15% yield, 80% ee;  $[\alpha]_{\text{D}}^{25} = +128.86$  ( $c = 0.50$ ,  $\text{CH}_2\text{Cl}_2$ ), m.p. 108.6 - 109.2 °C. The ee was determined by chiral HPLC (Chiralcel AD-H, Hexane/*i*-PrOH = 85/15, flow rate 1.5 mL/min,  $\lambda = 254$  nm,  $t_{(1S,2R,4S)-3n''} =$

11.1 min (minor),  $t_{(1R,2S,4R)-3n''} = 18.6$  min (major)).  $^1\text{H NMR}$  (400 MHz,  $\text{CDCl}_3$ )  $\delta$  7.94 (d,  $J = 2.3$  Hz, 1H), 7.89 - 7.80 (m, 2H), 7.78 - 7.70 (m, 2H), 7.18 - 7.14 (m, 1H), 5.93 - 5.74 (m, 1H), 5.18 - 5.07 (m, 1H), 4.96 (d,  $J = 10.6$  Hz, 1H), 4.72 - 4.57 (m, 1H), 3.87 (s, 3H), 3.67 - 3.55 (m, 1H), 3.43 (s, 3H), 2.74 (d,  $J = 15.4$  Hz, 1H), 2.67 - 2.58 (m, 1H), 2.53 (s, 3H), 2.19 (dd,  $J = 12.7, 6.8$  Hz, 1H).  $^{13}\text{C NMR}$  (101 MHz,  $\text{CDCl}_3$ )  $\delta$  181.3, 171.1, 168.7, 140.4, 135.2, 134.8, 134.4, 134.3, 131.3, 125.0, 123.4, 121.3, 117.9, 115.4, 71.6, 53.1, 51.7, 48.0, 43.3, 42.2, 29.6, 18.8. HRMS (ESI)  $m/z$ : calculated for  $\text{C}_{26}\text{H}_{23}\text{N}_2\text{O}_5\text{NaBr}$   $[\text{M}+\text{Na}]^+$ : 545.0688, found: 545.0692.

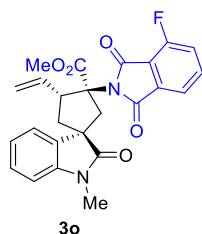

**Methyl (1S,3S,4R)-3-(4-fluoro-1,3-dioxoisindolin-2-yl)-1'-methyl-2'-oxo-4-vinylspiro[cyclopentane-1,3'-indoline]-3-carboxylate 3o:** White solid, 35.6 mg, 40% yield, 94% ee;  $[\alpha]_{\text{D}}^{25} = -12.13$  ( $c = 0.50$ ,  $\text{CH}_2\text{Cl}_2$ ), m.p. 92.9 - 93.7 °C. The ee was determined by chiral HPLC (Chiralcel IF, Hexane/*i*-PrOH = 85/15, flow rate 1.5 mL/min,  $\lambda = 254$  nm,  $t_{(1S,2R,4R)-3o} = 15.2$  min (minor),  $t_{(1R,2S,4S)-3o} = 28.6$  min (major)).  $^1\text{H NMR}$  (400 MHz,  $\text{CDCl}_3$ )  $\delta$  7.85 - 7.70 (m, 2H), 7.69 - 7.63 (m, 1H), 7.43 - 7.33 (m, 1H), 7.32 - 7.25 (m, 1H), 7.19 - 7.11 (m, 1H), 6.81 (d,  $J = 7.6$  Hz, 1H), 6.21 - 6.05 (m, 1H), 5.48 - 5.35 (m, 1H), 5.21 - 5.09 (m, 2H), 3.72 (s, 3H), 3.53 (d,  $J = 15.1$  Hz, 1H), 3.17 (s, 3H), 2.55 - 2.43 (m, 2H), 2.20 - 2.12 (m, 1H).  $^{13}\text{C NMR}$  (101 MHz,  $\text{CDCl}_3$ )  $\delta$  181.7, 171.7, 167.0 (d,  $J = 2.8$  Hz, 1C), 165.4, 157.6 (d,  $J = 266.3$  Hz, 1C), 143.3, 136.8 (d,  $J = 7.4$  Hz, 1C), 135.8, 134.2, 133.2, 128.2, 123.6, 123.3, 122.5 (d,  $J = 19.8$  Hz, 1C), 119.7 (d,  $J = 3.8$  Hz, 1C), 117.5 (d,  $J = 12.1$  Hz, 1C), 116.5, 107.9, 72.7, 52.6, 51.1, 48.0, 44.6, 40.5, 26.3. HRMS (ESI)  $m/z$ : calculated for  $\text{C}_{25}\text{H}_{22}\text{N}_2\text{O}_5\text{F}$   $[\text{M}+\text{H}]^+$ : 449.1513, found: 449.1516.

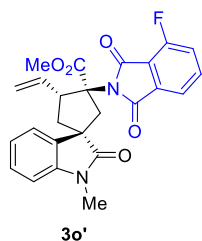

**Methyl (1R,3S,4R)-3-(4-fluoro-1,3-dioxoisindolin-2-yl)-1'-methyl-2'-oxo-4-vinylspiro[cyclopentane-1,3'-indoline]-3-carboxylate 3o':** White solid, 17.8 mg, 20% yield, 88% ee;  $[\alpha]_{\text{D}}^{25} = -16.26$  ( $c = 0.50$ ,  $\text{CH}_2\text{Cl}_2$ ), m.p. 106.1 - 106.9 °C. The ee was determined by chiral HPLC (Chiralcel AD-H, Hexane/*i*-PrOH = 85/15, flow rate 1.5 mL/min,  $\lambda = 254$  nm,  $t_{(1R,2R,4S)-3o'} = 20.7$  min (minor),  $t_{(1S,2S,4R)-3o'} = 24.9$  min (major)).  $^1\text{H NMR}$  (400 MHz,  $\text{CDCl}_3$ )  $\delta$  7.80 - 7.73 (m, 1H), 7.72 - 7.67 (m, 1H), 7.46 - 7.38 (m, 1H), 7.31 - 7.23 (m, 2H), 7.06 - 6.96 (m, 1H), 6.84 (d,  $J = 7.6$  Hz, 1H), 6.23 - 6.10 (m, 1H), 5.27 - 5.09 (m, 2H), 5.08 - 4.94 (m, 1H), 3.78 (s, 3H), 3.70 (d,  $J = 15.2$  Hz, 1H), 3.24 (s, 3H), 2.71 (t,  $J = 12.6$  Hz, 1H), 2.51 (d,  $J = 15.2$  Hz, 1H), 2.02 - 1.94 (m, 1H).  $^{13}\text{C NMR}$  (101 MHz,  $\text{CDCl}_3$ )  $\delta$  179.2, 170.6, 167.8 (d,  $J = 2.9$  Hz, 1C), 165.7, 157.8 (d,  $J = 266.7$  Hz, 1C), 142.8, 137.0 (d,  $J = 7.6$  Hz, 1C), 135.8, 135.4, 133.9, 128.2, 122.9, 122.7 (d,  $J = 5.1$  Hz, 1C), 122.6, 119.8 (d,  $J = 3.8$  Hz, 1C), 117.6 (d,  $J = 11.9$  Hz, 1C), 117.4, 108.2, 73.6, 53.0, 52.4, 47.5, 46.8, 41.3, 26.6. HRMS (ESI)  $m/z$ : calculated for  $\text{C}_{25}\text{H}_{22}\text{N}_2\text{O}_5\text{F}$   $[\text{M}+\text{H}]^+$ : 449.1513, found: 449.1516.

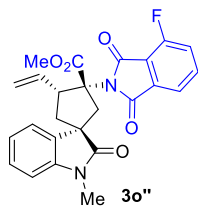

**Methyl (1*S*,3*R*,4*R*)-3-(4-fluoro-1,3-dioxoisindolin-2-yl)-1'-methyl-2'-oxo-4-vinylspiro[cyclopentane-1,3'-indoline]-3-carboxylate 3o'**: White solid, 17.8 mg, 20% yield, 88% ee;  $[\alpha]_D^{25} = +54.46$  ( $c = 0.50$ , CH<sub>2</sub>Cl<sub>2</sub>), m.p. 85.4 - 86.7 °C. The ee was determined by chiral HPLC (Chiralcel AD-H, Hexane/*i*-PrOH = 85/15, flow rate 1.5 mL/min,  $\lambda = 254$  nm,  $t_{(1*S*,2*R*,4*S*)-3o'} = 15.3$  min (minor),  $t_{(1*R*,2*S*,4*R*)-3o'} = 28.9$  min (major)). <sup>1</sup>H NMR (400 MHz, CDCl<sub>3</sub>)  $\delta$  7.86 (d,  $J = 7.7$  Hz, 1H), 7.70 - 7.63 (m, 1H), 7.59 (d,  $J = 7.2$  Hz, 1H), 7.33 (t,  $J = 8.4$  Hz, 1H), 7.24 - 7.17 (m, 1H), 7.08 (t,  $J = 7.6$  Hz, 1H), 6.74 (d,  $J = 7.7$  Hz, 1H), 5.87 - 5.76 (m, 1H), 5.09 - 5.01 (m, 1H), 4.95-4.89 (m, 1H), 4.63-4.54 (m, 1H), 3.81 (s, 3H), 3.65 (d,  $J = 15.4$  Hz, 1H), 3.11 (s, 3H), 2.70 (d,  $J = 15.5$  Hz, 1H), 2.65 (t,  $J = 12.0$ , 1H), 2.20 (dd,  $J = 12.0, 6.8$  Hz, 1H). <sup>13</sup>C NMR (101 MHz, CDCl<sub>3</sub>)  $\delta$  181.2, 171.0, 167.6 (d,  $J = 2.8$  Hz, 1C), 165.6, 157.7 (d,  $J = 266.4$  Hz, 1C), 143.6, 136.9 (d,  $J = 7.5$  Hz, 1C), 135.1, 133.6, 132.7, 128.3, 124.1, 123.2, 122.7 (d,  $J = 19.8$  Hz, 1C), 119.7 (d,  $J = 3.7$  Hz, 1C), 117.9, 117.3 (d,  $J = 12.0$  Hz, 1C), 107.8, 72.2, 53.3, 52.1, 48.2, 43.0, 41.9, 26.3. HRMS (ESI)  $m/z$ : calculated for C<sub>25</sub>H<sub>22</sub>N<sub>2</sub>O<sub>5</sub>F [M+H]<sup>+</sup>: 449.1513, found: 449.1516.

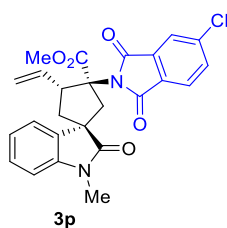

**Methyl (1*S*,3*S*,4*R*)-3-(5-chloro-1,3-dioxoisindolin-2-yl)-1'-methyl-2'-oxo-4-vinylspiro[cyclopentane-1,3'-indoline]-3-carboxylate 3p**: Yellow solid, 33.6 mg, 36% yield, 93% ee;  $[\alpha]_D^{25} = -9.40$  ( $c = 0.50$ , CH<sub>2</sub>Cl<sub>2</sub>), m.p. 93.2 - 94.0 °C. The ee was determined by chiral HPLC (Chiralcel IF, Hexane/*i*-PrOH = 85/15, flow rate 1.5 mL/min,  $\lambda = 254$  nm,  $t_{(1*S*,2*R*,4*R*)-3p} = 15.9$  min (minor),  $t_{(1*R*,2*S*,4*S*)-3p} = 20.7$  min (major)). <sup>1</sup>H NMR (400 MHz, CDCl<sub>3</sub>)  $\delta$  7.88 - 7.71 (m, 3H), 7.71 - 7.64 (m, 1H), 7.31 - 7.24 (m, 1H), 7.20 - 7.08 (m, 1H), 6.81 (d,  $J = 7.6$  Hz, 1H), 6.21 - 6.01 (m, 1H), 5.48 - 5.33 (m, 1H), 5.25 - 5.09 (m, 2H), 3.71 (s, 3H), 3.52 (d,  $J = 15.0$  Hz, 1H), 3.16 (s, 3H), 2.58 - 2.38 (m, 2H), 2.16 (dd,  $J = 12.9, 6.2$  Hz, 1H). <sup>13</sup>C NMR (101 MHz, CDCl<sub>3</sub>)  $\delta$  181.7, 171.7, 167.4, 167.1, 143.3, 140.8, 135.8, 134.2, 133.5, 133.2, 129.9, 128.2, 124.7, 123.8, 123.6, 123.2, 116.5, 107.8, 72.7, 52.6, 51.1, 47.9, 44.6, 40.5, 26.2. HRMS (ESI)  $m/z$ : calculated for C<sub>25</sub>H<sub>21</sub>N<sub>2</sub>O<sub>5</sub>NaCl [M+Na]<sup>+</sup>: 487.1037, found: 487.1037.

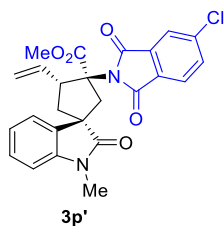

**Methyl (1*R*,3*S*,4*R*)-3-(5-chloro-1,3-dioxoisindolin-2-yl)-1'-methyl-2'-oxo-4-vinylspiro[cyclopentane-1,3'-indoline]-3-carboxylate 3p'**: Yellow solid, 20.2 mg, 22% yield, 81%

ee;  $[\alpha]_D^{25} = -8.93$  ( $c = 0.50$ ,  $\text{CH}_2\text{Cl}_2$ ), m.p. 83.0 - 83.9 °C. The ee was determined by chiral HPLC (Chiralcel IF, Hexane/*i*-PrOH = 85/15, flow rate 1.5 mL/min,  $\lambda = 254$  nm,  $t_{(1R,2R,4S)\text{-}3p'} = 24.9$  min (minor),  $t_{(1S,2S,4R)\text{-}3p'} = 61.0$  min (major)).  $^1\text{H}$  NMR (400 MHz,  $\text{CDCl}_3$ )  $\delta$  7.89 - 7.76 (m, 2H), 7.74 - 7.68 (m, 1H), 7.28 - 7.22 (m, 2H), 6.99 (t,  $J = 7.5$  Hz, 1H), 6.83 (d,  $J = 7.8$  Hz, 1H), 6.25 - 6.05 (m, 1H), 5.24 - 5.12 (m, 2H), 5.06 - 4.96 (m, 1H), 3.77 (s, 3H), 3.70 (d,  $J = 15.2$  Hz, 1H), 3.24 (s, 3H), 2.71 (d,  $J = 12.5$  Hz, 1H), 2.50 (d,  $J = 15.2$  Hz, 1H), 2.03 - 1.94 (m, 1H).  $^{13}\text{C}$  NMR (101 MHz,  $\text{CDCl}_3$ )  $\delta$  179.2, 170.6, 168.1, 167.7, 142.8, 141.2, 135.8, 135.4, 134.5, 133.4, 129.7, 128.2, 124.8, 124.0, 122.9, 122.6, 117.4, 108.2, 73.6, 52.9, 52.4, 47.5, 46.9, 41.4, 26.6. HRMS (ESI)  $m/z$ : calculated for  $\text{C}_{25}\text{H}_{21}\text{N}_2\text{O}_5\text{NaCl}$   $[\text{M}+\text{Na}]^+$ : 487.1037, found: 487.1037.

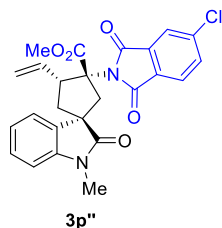

**Methyl (1S,3R,4R)-3-(5-chloro-1,3-dioxoisindolin-2-yl)-1'-methyl-2'-oxo-4-vinylspiro[cyclopentane-1,3'-indoline]-3-carboxylate 3p'**: Yellow solid, 13.5 mg, 15% yield, 83% ee;  $[\alpha]_D^{25} = +91.66$  ( $c = 0.50$ ,  $\text{CH}_2\text{Cl}_2$ ), m.p. 83.7 - 84.4 °C. The ee was determined by chiral HPLC (Chiralcel IF, Hexane/*i*-PrOH = 85/15, flow rate 1.5 mL/min,  $\lambda = 254$  nm,  $t_{(1S,2R,4S)\text{-}3p''} = 15.6$  min (minor),  $t_{(1R,2S,4R)\text{-}3p''} = 18.9$  min (major)).  $^1\text{H}$  NMR (400 MHz,  $\text{CDCl}_3$ )  $\delta$  7.91 (d,  $J = 7.4$  Hz, 1H), 7.86 - 7.59 (m, 3H), 7.32 - 7.25 (m, 1H), 7.14 (t,  $J = 7.5$  Hz, 1H), 6.81 (d,  $J = 7.6$  Hz, 1H), 5.97 - 5.76 (m, 1H), 5.10 (d,  $J = 17.4$  Hz, 1H), 4.97 (d,  $J = 10.6$  Hz, 1H), 4.76 - 4.53 (m, 1H), 3.87 (s, 3H), 3.71 (d,  $J = 15.4$  Hz, 1H), 3.18 (s, 3H), 2.77 (d,  $J = 15.5$  Hz, 1H), 2.68 - 2.55 (m, 1H), 2.27 (dd,  $J = 12.8, 6.7$  Hz, 1H).  $^{13}\text{C}$  NMR (101 MHz,  $\text{CDCl}_3$ )  $\delta$  181.2, 171.0, 167.9, 167.6, 143.6, 141.1, 135.1, 134.5, 133.1, 132.8, 129.5, 128.3, 124.7, 124.0, 123.8, 123.2, 117.9, 107.9, 72.2, 53.2, 52.1, 48.3, 43.1, 41.9, 26.3. HRMS (ESI)  $m/z$ : calculated for  $\text{C}_{25}\text{H}_{21}\text{N}_2\text{O}_5\text{NaCl}$   $[\text{M}+\text{Na}]^+$ : 487.1037, found: 487.1037.

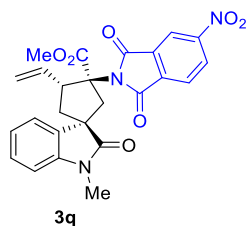

**Methyl (1S,3S,4R)-1'-methyl-3-(5-nitro-1,3-dioxoisindolin-2-yl)-2'-oxo-4-vinylspiro[cyclopentane-1,3'-indoline]-3-carboxylate 3q**: Yellow solid, 47.8 mg, 50% yield, 91% ee;  $[\alpha]_D^{25} = -15.69$  ( $c = 0.50$ ,  $\text{CH}_2\text{Cl}_2$ ), m.p. 112.5 - 113.4 °C. The ee was determined by chiral HPLC (Chiralcel IH, Hexane/*i*-PrOH = 85/15, flow rate 1.5 mL/min,  $\lambda = 254$  nm,  $t_{(1S,2R,4R)\text{-}3q} = 11.0$  min (minor),  $t_{(1R,2S,4S)\text{-}3q} = 13.8$  min (major)).  $^1\text{H}$  NMR (400 MHz,  $\text{CDCl}_3$ )  $\delta$  8.75 - 8.51 (m, 2H), 8.04 (d,  $J = 8.1$  Hz, 1H), 7.71 (d,  $J = 7.4$  Hz, 1H), 7.35 - 7.24 (m, 1H), 7.19 - 7.11 (m, 1H), 6.82 (d,  $J = 7.7$  Hz, 1H), 6.15 - 6.01 (m, 1H), 5.45 - 5.33 (m, 1H), 5.23 - 5.11 (m, 2H), 3.73 (s, 3H), 3.53 (d,  $J = 15.1$  Hz, 1H), 3.16 (s, 3H), 2.55 - 2.42 (m, 2H), 2.26 - 2.14 (m, 1H).  $^{13}\text{C}$  NMR (101 MHz,  $\text{CDCl}_3$ )  $\delta$  181.7, 171.4, 166.3, 166.2, 151.9, 143.3, 136.3, 135.5, 133.1, 133.0, 129.4, 128.4, 124.7, 123.6, 123.4, 118.9, 117.0, 108.0, 73.3, 52.8, 51.2, 47.8, 44.8, 40.6, 26.3. HRMS (ESI)  $m/z$ : calculated for  $\text{C}_{25}\text{H}_{22}\text{N}_3\text{O}_7$   $[\text{M}+\text{H}]^+$ : 476.1458, found: 476.1462.

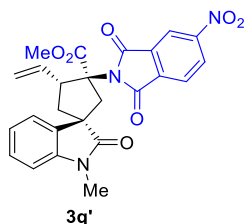

**Methyl (1R,3S,4R)-1'-methyl-3-(5-nitro-1,3-dioxoisindolin-2-yl)-2'-oxo-4-vinylspiro[cyclopentane-1,3'-indoline]-3-carboxylate 3q'**: Yellow solid, 13.7 mg, 14% yield, 72% ee;  $[\alpha]_{\text{D}}^{25} = -21.15$  ( $c = 0.50$ , CH<sub>2</sub>Cl<sub>2</sub>), m.p. 96.3 - 97.1 °C. The ee was determined by chiral HPLC (Chiralcel IH, Hexane/*i*-PrOH = 85/15, flow rate 1.5 mL/min,  $\lambda = 254$  nm,  $t_{(1R,2R,4S)-3q'} = 16.9$  min (minor),  $t_{(1S,2S,4R)-3q'} = 20.2$  min (major)). <sup>1</sup>H NMR (400 MHz, CDCl<sub>3</sub>)  $\delta$  8.78 - 8.50 (m, 2H), 8.07 (d,  $J = 8.2$  Hz, 1H), 7.34 - 7.18 (m, 2H), 7.07 - 6.95 (m, 1H), 6.85 (d,  $J = 7.8$  Hz, 1H), 6.23 - 6.03 (m, 1H), 5.28 - 5.11 (m, 2H), 5.07 - 4.95 (m, 1H), 3.88 - 3.63 (m, 4H), 3.25 (s, 3H), 2.81 - 2.66 (m, 1H), 2.57 - 2.42 (m, 1H), 2.07 - 1.94 (m, 1H). <sup>13</sup>C NMR (101 MHz, CDCl<sub>3</sub>)  $\delta$  179.0, 170.4, 167.0, 166.6, 152.1, 142.9, 136.0, 135.7, 135.1, 133.1, 129.7, 128.3, 124.9, 122.9, 122.5, 119.1, 117.8, 108.4, 74.0, 53.1, 52.4, 47.5, 47.0, 41.4, 26.7. HRMS (ESI)  $m/z$ : calculated for C<sub>25</sub>H<sub>22</sub>N<sub>3</sub>O<sub>7</sub> [M+H]<sup>+</sup>: 476.1458, found: 476.1462.

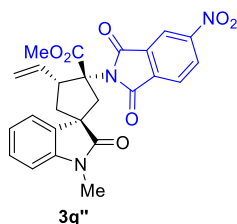

**Methyl (1S,3R,4R)-1'-methyl-3-(5-nitro-1,3-dioxoisindolin-2-yl)-2'-oxo-4-vinylspiro[cyclopentane-1,3'-indoline]-3-carboxylate 3q''**: Yellow solid, 13.7 mg, 14% yield, 71% ee;  $[\alpha]_{\text{D}}^{25} = +63.22$  ( $c = 0.50$ , CH<sub>2</sub>Cl<sub>2</sub>), m.p. 111.8 - 113.0 °C. The ee was determined by chiral HPLC (Chiralcel IH, Hexane/*i*-PrOH = 85/15, flow rate 1.5 mL/min,  $\lambda = 254$  nm,  $t_{(1S,2R,4S)-3q''} = 15.8$  min (major),  $t_{(1R,2S,4R)-3q''} = 28.8$  min (minor)). <sup>1</sup>H NMR (400 MHz, CDCl<sub>3</sub>)  $\delta$  8.79 - 8.53 (m, 2H), 8.04 (d,  $J = 8.2$  Hz, 1H), 7.91 (d,  $J = 7.5$  Hz, 1H), 7.39 - 7.23 (m, 1H), 7.17 (t,  $J = 7.6$  Hz, 1H), 6.83 (d,  $J = 7.8$  Hz, 1H), 5.99 - 5.80 (m, 1H), 5.12 (d,  $J = 17.2$  Hz, 1H), 4.99 (d,  $J = 10.5$  Hz, 1H), 4.75 - 4.61 (m, 1H), 3.89 (s, 3H), 3.72 (d,  $J = 15.4$  Hz, 1H), 3.20 (s, 3H), 2.81 (d,  $J = 15.5$  Hz, 1H), 2.68 - 2.56 (m, 1H), 2.38 - 2.25 (m, 1H). <sup>13</sup>C NMR (101 MHz, CDCl<sub>3</sub>)  $\delta$  181.1, 170.7, 166.8, 166.5, 152.1, 143.6, 135.7, 135.0, 132.8, 132.6, 129.6, 128.4, 124.8, 123.9, 123.2, 118.9, 118.1, 108.0, 72.7, 53.4, 52.0, 48.3, 43.0, 41.8, 26.3. HRMS (ESI)  $m/z$ : calculated for C<sub>25</sub>H<sub>22</sub>N<sub>3</sub>O<sub>7</sub> [M+H]<sup>+</sup>: 476.1458, found: 476.1462.

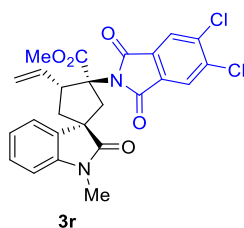

**Methyl (1S,3S,4R)-3-(5,6-dichloro-1,3-dioxoisindolin-2-yl)-1'-methyl-2'-oxo-4-vinylspiro[cyclopentane-1,3'-indoline]-3-carboxylate 3r**: White solid, 43 mg, 43% yield, 95% ee;  $[\alpha]_{\text{D}}^{25} = +5.91$  ( $c = 0.50$ , CH<sub>2</sub>Cl<sub>2</sub>), m.p. 83.7 - 84.5 °C. The ee was determined by chiral HPLC

(Chiralcel AD-H, Hexane/*i*-PrOH = 85/15, flow rate 1.5 mL/min,  $\lambda = 254$  nm,  $t_{(1S,2R,4R)-3r} = 11.9$  min (minor),  $t_{(1R,2S,4S)-3r} = 13.3$  min (major)).  $^1\text{H NMR}$  (400 MHz,  $\text{CDCl}_3$ )  $\delta$  7.94 (s, 2H), 7.27 - 7.24 (m, 1H), 7.24 - 7.20 (m, 1H), 7.04 - 6.93 (m, 1H), 6.83 (d,  $J = 7.7$  Hz, 1H), 6.24 - 6.00 (m, 1H), 5.28 - 5.10 (m, 2H), 5.06 - 4.92 (m, 1H), 3.76 (s, 3H), 3.68 (d,  $J = 15.2$  Hz, 1H), 3.23 (s, 3H), 2.70 (d,  $J = 15.3$  Hz, 1H), 2.47 (dd,  $J = 13.8, 11.1$  Hz, 1H), 2.01 - 1.95 (m, 1H).  $^{13}\text{C NMR}$  (101 MHz,  $\text{CDCl}_3$ )  $\delta$  179.1, 170.5, 167.1, 142.9, 139.5, 135.7, 135.2, 130.8, 128.2, 125.7, 122.9, 122.5, 117.6, 108.3, 73.8, 53.0, 52.4, 47.5, 46.9, 41.3, 26.7. HRMS (ESI)  $m/z$ : calculated for  $\text{C}_{25}\text{H}_{21}\text{N}_2\text{O}_5\text{Cl}_2$   $[\text{M}+\text{H}]^+$ : 499.0828, found: 499.0832.

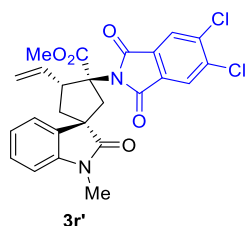

**Methyl (1R,3S,4R)-3-(5,6-dichloro-1,3-dioxoisindolin-2-yl)-1'-methyl-2'-oxo-4-vinylspiro[cyclopentane-1,3'-indoline]-3-carboxylate 3r'**: White solid, 17.2 mg, 17% yield, 77% ee;  $[\alpha]_{\text{D}}^{25} = +57.8$  ( $c = 0.50$ ,  $\text{CH}_2\text{Cl}_2$ ), m.p. 149.3 - 151.0 °C. The ee was determined by chiral HPLC (Chiralcel AD-H, Hexane/*i*-PrOH = 85/15, flow rate 1.5 mL/min,  $\lambda = 254$  nm,  $t_{(1R,2R,4S)-3r'} = 8.4$  min (minor),  $t_{(1S,2S,4R)-3r'} = 14.5$  min (major)).  $^1\text{H NMR}$  (400 MHz,  $\text{CDCl}_3$ )  $\delta$  7.98 - 7.83 (m, 3H), 7.32 - 7.27 (m, 1H), 7.15 (t,  $J = 7.4$  Hz, 1H), 6.81 (d,  $J = 7.7$  Hz, 1H), 5.90 - 5.79 (m, 1H), 5.10 (d,  $J = 17.3$  Hz, 1H), 4.98 (d,  $J = 10.5$  Hz, 1H), 4.70 - 4.60 (m, 1H), 3.86 (s, 3H), 3.69 (d,  $J = 15.5$  Hz, 1H), 3.18 (s, 3H), 2.76 (d,  $J = 15.4$  Hz, 1H), 2.60 (t,  $J = 12.8$  Hz, 1H), 2.27 (dd,  $J = 15.2, 1.0$  Hz, 1H).  $^{13}\text{C NMR}$  (101 MHz,  $\text{CDCl}_3$ )  $\delta$  181.2, 170.9, 166.9, 143.6, 139.4, 135.0, 132.7, 130.5, 128.4, 125.6, 123.9, 123.2, 118.0, 107.9, 72.4, 53.3, 52.0, 48.2, 43.0, 41.8, 26.3. HRMS (ESI)  $m/z$ : calculated for  $\text{C}_{25}\text{H}_{21}\text{N}_2\text{O}_5\text{Cl}_2$   $[\text{M}+\text{H}]^+$ : 499.0828, found: 499.0832.

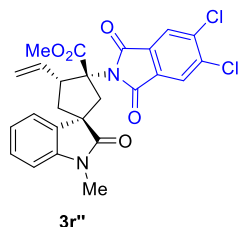

**Methyl (1S,3R,4R)-3-(5,6-dichloro-1,3-dioxoisindolin-2-yl)-1'-methyl-2'-oxo-4-vinylspiro[cyclopentane-1,3'-indoline]-3-carboxylate 3r''**: White solid, 17.2 mg, 17% yield, 86% ee;  $[\alpha]_{\text{D}}^{25} = -16.64$  ( $c = 0.50$ ,  $\text{CH}_2\text{Cl}_2$ ), m.p. 103.6 - 104.6 °C. The ee was determined by chiral HPLC (Chiralcel AD-H, Hexane/*i*-PrOH = 85/15, flow rate 1.5 mL/min,  $\lambda = 254$  nm,  $t_{(1S,2R,4S)-3r''} = 6.5$  min (minor),  $t_{(1R,2S,4R)-3r''} = 10.1$  min (major)).  $^1\text{H NMR}$  (400 MHz,  $\text{CDCl}_3$ )  $\delta$  7.86 (s, 2H), 7.68 (d,  $J = 7.3$  Hz, 1H), 7.24 - 7.22 (m, 1H), 7.09 (t,  $J = 7.3$  Hz, 1H), 6.77 (d,  $J = 7.7$  Hz, 1H), 6.07-5.99 (m, 1H), 5.36-5.29 (m, 1H), 5.13 - 5.09 (m, 2H), 3.66 (s, 3H), 3.46 (d,  $J = 15.0$  Hz, 1H), 3.12 (s, 3H), 2.38-2.47 (m, 2H), 2.13 (dd,  $J = 13.1, 6.2$  Hz, 1H).  $^{13}\text{C NMR}$  (101 MHz,  $\text{CDCl}_3$ )  $\delta$  181.6, 171.6, 166.5, 143.3, 139.1, 135.6, 133.1, 130.9, 128.3, 125.5, 123.6, 123.3, 116.7, 107.9, 72.9, 52.7, 51.1, 47.8, 44.6, 40.5, 26.3. HRMS (ESI)  $m/z$ : calculated for  $\text{C}_{25}\text{H}_{21}\text{N}_2\text{O}_5\text{Cl}_2$   $[\text{M}+\text{H}]^+$ : 499.0828, found: 499.0832.

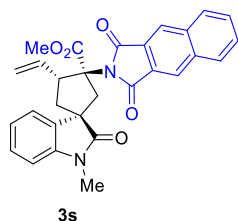

**Methyl (1S,3S,4R)-3-(1,3-dioxo-1,3-dihydro-2H-benzo[f]isoindol-2-yl)-1'-methyl-2'-oxo-4-vinylspiro[cyclopentane-1,3'-indoline]-3-carboxylate 3s:** White solid, 28 mg, 29% yield, 94% ee;  $[\alpha]_D^{25} = -27.98$  ( $c = 0.50$ ,  $\text{CH}_2\text{Cl}_2$ ), m.p. 116.9 - 117.4 °C. The ee was determined by chiral HPLC (Chiralcel AD-H, Hexane/*i*-PrOH = 70/30, flow rate 2.0 mL/min,  $\lambda = 254$  nm,  $t_{(1S,2R,4R)-3s} = 10.8$  min (major),  $t_{(1R,2S,4S)-3s} = 20.4$  min (minor)).  $^1\text{H NMR}$  (400 MHz,  $\text{CDCl}_3$ )  $\delta$  8.30 (s, 2H), 8.08 - 7.97 (m, 2H), 7.81 (d,  $J = 7.4$  Hz, 1H), 7.74 - 7.62 (m, 2H), 7.35 - 7.23 (m, 1H), 7.20 - 7.06 (m, 1H), 6.81 (d,  $J = 7.7$  Hz, 1H), 6.28 - 6.10 (m, 1H), 5.59 - 5.46 (m, 1H), 5.24 - 5.06 (m, 2H), 3.71 (s, 3H), 3.60 (d,  $J = 15.0$  Hz, 1H), 3.17 (s, 3H), 2.61 - 2.43 (m, 2H), 2.25 - 2.13 (m, 1H).  $^{13}\text{C NMR}$  (101 MHz,  $\text{CDCl}_3$ )  $\delta$  181.8, 172.0, 168.2, 143.3, 136.1, 135.6, 133.5, 130.3, 129.2, 128.2, 127.6, 124.8, 123.8, 123.3, 116.2, 107.8, 72.9, 52.5, 51.0, 48.1, 44.6, 40.4, 26.3. HRMS (ESI)  $m/z$ : calculated for  $\text{C}_{29}\text{H}_{24}\text{N}_2\text{O}_5\text{Na}$   $[\text{M}+\text{Na}]^+$ : 503.1583, found: 503.1584.

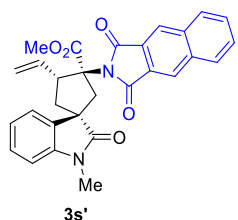

**Methyl (1R,3S,4R)-3-(1,3-dioxo-1,3-dihydro-2H-benzo[f]isoindol-2-yl)-1'-methyl-2'-oxo-4-vinylspiro[cyclopentane-1,3'-indoline]-3-carboxylate 3s':** White solid, 28 mg, 29% yield, 81% ee;  $[\alpha]_D^{25} = -27.04$  ( $c = 0.50$ ,  $\text{CH}_2\text{Cl}_2$ ), m.p. 95.0 - 95.9 °C. The ee was determined by chiral HPLC (Chiralcel AD-H, Hexane/*i*-PrOH = 70/30, flow rate 2.0 mL/min,  $\lambda = 254$  nm,  $t_{(1R,2R,4S)-3s'} = 7.7$  min (minor),  $t_{(1S,2S,4R)-3s'} = 23.0$  min (major)).  $^1\text{H NMR}$  (400 MHz,  $\text{CDCl}_3$ )  $\delta$  8.35 (s, 2H), 8.11 - 7.99 (m, 2H), 7.77 - 7.62 (m, 2H), 7.33 (d,  $J = 7.6$  Hz, 1H), 7.29 - 7.15 (m, 1H), 6.97 (t,  $J = 7.6$  Hz, 1H), 6.82 (d,  $J = 7.8$  Hz, 1H), 6.33 - 6.17 (m, 1H), 5.26 - 5.08 (m, 3H), 3.87 - 3.69 (m, 4H), 3.24 (s, 3H), 2.73 (t,  $J = 12.4$  Hz, 1H), 2.58 (d,  $J = 15.1$  Hz, 1H), 2.09 - 1.97 (m, 1H).  $^{13}\text{C NMR}$  (101 MHz,  $\text{CDCl}_3$ )  $\delta$  179.3, 170.7, 168.7, 142.8, 136.0, 135.8, 135.7, 130.4, 129.4, 128.1, 127.3, 125.1, 122.9, 122.7, 117.2, 108.1, 73.7, 52.8, 52.4, 47.5, 46.9, 41.4, 26.6. HRMS (ESI)  $m/z$ : calculated for  $\text{C}_{29}\text{H}_{24}\text{N}_2\text{O}_5\text{Na}$   $[\text{M}+\text{Na}]^+$ : 503.1583, found: 503.1584.

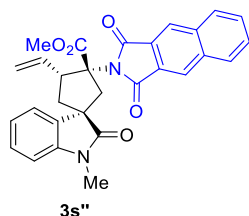

**Methyl (1S,3R,4R)-3-(1,3-dioxo-1,3-dihydro-2H-benzo[f]isoindol-2-yl)-1'-methyl-2'-oxo-4-vinylspiro[cyclopentane-1,3'-indoline]-3-carboxylate 3s'':** White solid, 18.7 mg, 20% yield, 87% ee;  $[\alpha]_D^{25} = +108.48$  ( $c = 0.50$ ,  $\text{CH}_2\text{Cl}_2$ ), m.p. 216.9 - 217.5 °C. The ee was determined by chiral HPLC (Chiralcel AD-H, Hexane/*i*-PrOH = 85/15, flow rate 1.5 mL/min,  $\lambda = 254$  nm,  $t_{(1S,2R,4S)-3s''} =$

16.6 min (major),  $t_{(1R,2S,4R)-3t} = 19.3$  min (minor)).  $^1\text{H NMR}$  (400 MHz,  $\text{CDCl}_3$ )  $\delta$  8.33 (s, 2H), 8.11 - 7.91 (m, 3H), 7.77 - 7.60 (m, 2H), 7.35 - 7.23 (m, 1H), 7.22 - 7.12 (m, 1H), 6.82 (d,  $J = 7.8$  Hz, 1H), 6.01 - 5.80 (m, 1H), 5.13 (d,  $J = 17.3$  Hz, 1H), 4.96 (d,  $J = 10.5$  Hz, 1H), 4.81 - 4.63 (m, 1H), 4.07 - 3.73 (m, 4H), 3.20 (s, 3H), 2.88 - 2.59 (m, 2H), 2.37 - 2.21 (m, 1H).  $^{13}\text{C NMR}$  (101 MHz,  $\text{CDCl}_3$ )  $\delta$  181.3, 171.3, 168.6, 143.6, 135.7, 135.3, 132.9, 130.4, 129.4, 128.2, 127.1, 124.9, 124.1, 123.2, 117.7, 107.8, 72.3, 53.2, 52.2, 48.4, 43.1, 42.0, 26.3. HRMS (ESI)  $m/z$ : calculated for  $\text{C}_{29}\text{H}_{24}\text{N}_2\text{O}_5\text{Na}$   $[\text{M}+\text{Na}]^+$ : 503.1583, found: 503.1584.

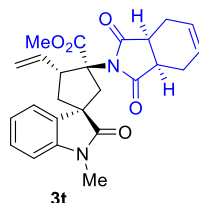

**Methyl (1S,3S,4R)-3-(1,3-dioxo-1,3,4,7-tetrahydro-2H-isoindol-2-yl)-1'-methyl-2'-oxo-4-vinylspiro[cyclopentane-1,3'-indoline]-3-carboxylate 3t**: Yellow solid, 41 mg, 47% yield, 93% ee;  $[\alpha]_{\text{D}}^{25} = +45.53$  ( $c = 0.50$ ,  $\text{CH}_2\text{Cl}_2$ ), m.p. 62.1 - 62.9 °C. The ee was determined by chiral HPLC (Chiralcel IF, Hexane/*i*-PrOH = 85/15, flow rate 1.5 mL/min,  $\lambda = 254$  nm,  $t_{(1S,2R,4R)-3t} = 10.4$  min (minor),  $t_{(1R,2S,4S)-3t} = 14.0$  min (major)).  $^1\text{H NMR}$  (400 MHz,  $\text{CDCl}_3$ )  $\delta$  7.72 (dd,  $J = 7.4, 1.2$  Hz, 1H), 7.29 - 7.23 (m, 1H), 7.16 - 7.06 (m, 1H), 6.80 (d,  $J = 7.6$  Hz, 1H), 6.12 - 6.01 (m, 1H), 6.00 - 5.86 (m, 2H), 5.31 - 5.18 (m, 1H), 5.13 - 4.96 (m, 2H), 3.67 (s, 3H), 3.41 (d,  $J = 15.0$  Hz, 1H), 3.17 (s, 3H), 3.15 - 3.09 (m, 1H), 3.09 - 3.00 (m, 1H), 2.65 - 2.54 (m, 2H), 2.38 (t,  $J = 12.8$  Hz, 1H), 2.30 - 2.19 (m, 3H), 2.10 (dd,  $J = 12.8, 6.3$  Hz, 1H).  $^{13}\text{C NMR}$  (101 MHz,  $\text{CDCl}_3$ )  $\delta$  181.6, 180.5, 179.8, 171.3, 143.2, 136.1, 133.4, 128.1, 127.5, 127.4, 123.6, 123.1, 115.9, 107.7, 73.1, 52.2, 50.7, 47.2, 44.0, 40.2, 39.2, 38.6, 26.2, 23.6, 23.4. HRMS (ESI)  $m/z$ : calculated for  $\text{C}_{25}\text{H}_{26}\text{N}_2\text{O}_5\text{Na}$   $[\text{M}+\text{Na}]^+$ : 457.1739, found: 457.1739.

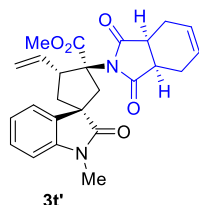

**Methyl (1R,3S,4R)-3-(1,3-dioxo-1,3,4,7-tetrahydro-2H-isoindol-2-yl)-1'-methyl-2'-oxo-4-vinylspiro[cyclopentane-1,3'-indoline]-3-carboxylate 3t'**: Yellow solid, 16.4 mg, 19% yield, 77% ee;  $[\alpha]_{\text{D}}^{25} = +48.73$  ( $c = 0.50$ ,  $\text{CH}_2\text{Cl}_2$ ), m.p. 58.9 - 60.7 °C. The ee was determined by chiral HPLC (Chiralcel IF, Hexane/*i*-PrOH = 85/15, flow rate 1.5 mL/min,  $\lambda = 254$  nm,  $t_{(1R,2R,4S)-3t'} = 18.1$  min (minor),  $t_{(1S,2S,4R)-3t'} = 19.9$  min (major)).  $^1\text{H NMR}$  (400 MHz,  $\text{CDCl}_3$ )  $\delta$  7.30 - 7.24 (m, 2H), 7.08 - 7.00 (m, 1H), 6.91 - 6.81 (m, 1H), 6.16 - 6.04 (m, 1H), 5.95 - 5.90 (m, 1H), 5.89 - 5.81 (m, 1H), 5.16 - 5.06 (m, 2H), 4.94 - 4.81 (m, 1H), 3.74 (s, 3H), 3.53 (d,  $J = 15.1$  Hz, 1H), 3.22 (s, 3H), 3.16 - 3.09 (m, 2H), 2.70 - 2.55 (m, 3H), 2.39 - 2.31 (m, 1H), 2.30 - 2.20 (m, 2H), 1.95 - 1.83 (m, 1H).  $^{13}\text{C NMR}$  (101 MHz,  $\text{CDCl}_3$ )  $\delta$  180.8, 180.5, 179.2, 170.1, 142.7, 135.8, 135.3, 128.1, 127.7, 127.7, 122.7, 122.6, 117.1, 108.1, 73.6, 52.7, 51.9, 46.6, 46.2, 41.0, 39.2, 38.8, 26.5, 23.7, 23.6. HRMS (ESI)  $m/z$ : calculated for  $\text{C}_{25}\text{H}_{26}\text{N}_2\text{O}_5\text{Na}$   $[\text{M}+\text{Na}]^+$ : 457.1739, found: 457.1739.

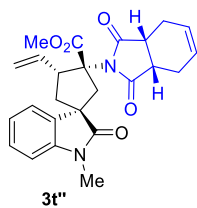

**Methyl (1*S*,3*R*,4*R*)-3-(1,3-dioxo-1,3,4,7-tetrahydro-2H-isoindol-2-yl)-1'-methyl-2'-oxo-4-vinylspiro[cyclopentane-1,3'-indoline]-3-carboxylate 3t''**: Yellow solid, 16.4 mg, 19% yield, 83% ee;  $[\alpha]_{\text{D}}^{25} = +32.53$  ( $c = 0.50$ , CH<sub>2</sub>Cl<sub>2</sub>), m.p. 60.2 - 60.9 °C. The ee was determined by chiral HPLC (Chiralcel IF, Hexane/*i*-PrOH = 85/15, flow rate 1.5 mL/min,  $\lambda = 254$  nm,  $t_{(1*S*,2*R*,4*S*)-3t''} = 15.1$  min (minor),  $t_{(1*R*,2*S*,4*R*)-3t''} = 18.1$  min (major)). <sup>1</sup>H NMR (400 MHz, CDCl<sub>3</sub>)  $\delta$  7.85 (d,  $J = 7.4$  Hz, 1H), 7.28 (s, 1H), 7.16 - 7.09 (m, 1H), 6.79 (d,  $J = 7.7$  Hz, 1H), 5.96 - 5.89 (m, 2H), 5.81 - 5.67 (m, 1H), 5.11 (d,  $J = 17.2$  Hz, 1H), 5.03 (d,  $J = 10.5$  Hz, 1H), 4.64 - 4.48 (m, 1H), 3.82 (s, 3H), 3.54 (d,  $J = 15.4$  Hz, 1H), 3.17 (s, 3H), 3.14 - 3.03 (m, 2H), 2.65 - 2.53 (m, 4H), 2.30 - 2.23 (m, 2H), 2.17 (dd,  $J = 12.7, 6.8$  Hz, 1H). <sup>13</sup>C NMR (101 MHz, CDCl<sub>3</sub>)  $\delta$  181.3, 180.7, 180.3, 171.1, 143.5, 135.3, 132.7, 128.2, 127.9, 127.8, 124.0, 123.1, 117.8, 107.7, 72.3, 53.0, 52.2, 47.8, 42.4, 42.2, 39.2, 38.6, 26.2, 23.6, 23.5. HRMS (ESI)  $m/z$ : calculated for C<sub>25</sub>H<sub>26</sub>N<sub>2</sub>O<sub>5</sub>Na [M+Na]<sup>+</sup>: 457.1739, found: 457.1739.

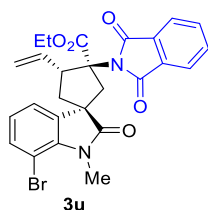

**Ethyl (1*S*,3*S*,4*R*)-7'-bromo-3-(1,3-dioxoisindolin-2-yl)-1'-methyl-2'-oxo-4-vinylspiro[cyclopentane-1,3'-indoline]-3-carboxylate 3u**: White solid, 33.8 mg, 33% yield, 84% ee;  $[\alpha]_{\text{D}}^{25} = -6.11$  ( $c = 0.50$ , CH<sub>2</sub>Cl<sub>2</sub>), m.p. 88.9 - 90.6 °C. The ee was determined by chiral HPLC (Chiralcel AD-H, Hexane/*i*-PrOH = 85/15, flow rate 1.5 mL/min,  $\lambda = 254$  nm,  $t_{(1*S*,2*R*,4*R*)-3u} = 7.9$  min (major),  $t_{(1*R*,2*S*,4*S*)-3u} = 13.5$  min (minor)). <sup>1</sup>H NMR (400 MHz, CDCl<sub>3</sub>)  $\delta$  7.91 - 7.77 (m, 2H), 7.77 - 7.62 (m, 3H), 7.35 (d,  $J = 8.0$  Hz, 1H), 7.00 - 6.88 (m, 1H), 6.24 - 5.99 (m, 1H), 5.52 - 5.33 (m, 1H), 5.13 (d,  $J = 5.7$  Hz, 1H), 5.10 (s, 1H), 4.26 - 4.10 (m, 2H), 3.62 - 3.39 (m, 4H), 2.54 - 2.34 (m, 2H), 2.19 - 2.08 (m, 1H), 1.22 - 1.16 (m, 3H). <sup>13</sup>C NMR (101 MHz, CDCl<sub>3</sub>)  $\delta$  182.1, 171.5, 168.4, 140.5, 136.6, 135.8, 134.2, 133.7, 131.8, 124.4, 123.4, 122.9, 116.4, 102.0, 72.0, 61.9, 50.8, 48.5, 44.5, 40.9, 29.8, 14.3. HRMS (ESI)  $m/z$ : calculated for C<sub>26</sub>H<sub>23</sub>N<sub>2</sub>O<sub>5</sub>NaBr [M+Na]<sup>+</sup>: 545.0688, found: 545.0692.

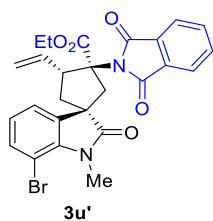

**Ethyl (1*R*,3*S*,4*R*)-7'-bromo-3-(1,3-dioxoisindolin-2-yl)-1'-methyl-2'-oxo-4-vinylspiro[cyclopentane-1,3'-indoline]-3-carboxylate 3u'**: White solid, 33.8 mg, 33% yield, 77% ee;  $[\alpha]_{\text{D}}^{25} = -23.93$  ( $c = 0.50$ , CH<sub>2</sub>Cl<sub>2</sub>), m.p. 75.2 - 76.2 °C. The ee was determined by chiral HPLC

(Chiralcel AD-H, Hexane/*i*-PrOH = 85/15, flow rate 1.5 mL/min,  $\lambda = 254$  nm,  $t_{(1R,2R,4S)-3u'} = 10.1$  min (major),  $t_{(1S,2S,4R)-3u'} = 11.8$  min (minor)).  $^1\text{H NMR}$  (400 MHz,  $\text{CDCl}_3$ )  $\delta$  7.88 - 7.81 (m, 2H), 7.77 - 7.72 (m, 2H), 7.32 (d,  $J = 8.1$  Hz, 1H), 7.20 (d,  $J = 7.3$  Hz, 1H), 6.87 - 6.75 (m, 1H), 6.24 - 6.11 (m, 1H), 5.20 - 5.08 (m, 2H), 5.01 - 4.92 (m, 1H), 4.28 - 4.17 (m, 2H), 3.69 (d,  $J = 15.3$  Hz, 1H), 3.61 (s, 3H), 2.71 (t,  $J = 12.6$  Hz, 1H), 2.51 (d,  $J = 15.3$  Hz, 1H), 2.01 - 1.94 (m, 1H), 1.32 - 1.26 (m, 3H).  $^{13}\text{C NMR}$  (101 MHz,  $\text{CDCl}_3$ )  $\delta$  179.9, 170.0, 169.0, 140.1, 139.2, 135.4, 134.5, 133.7, 131.7, 124.0, 123.5, 121.7, 117.4, 102.5, 73.1, 62.2, 52.0, 47.8, 46.8, 42.0, 30.3, 14.3. HRMS (ESI)  $m/z$ : calculated for  $\text{C}_{26}\text{H}_{23}\text{N}_2\text{O}_5\text{NaBr}$   $[\text{M}+\text{Na}]^+$ : 545.0688, found: 545.0692.

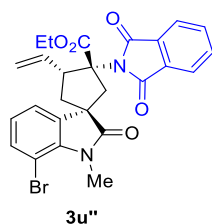

**Ethyl (1*S*,3*R*,4*R*)-7'-bromo-3-(1,3-dioxoisindolin-2-yl)-1'-methyl-2'-oxo-4-vinylspiro[cyclopentane-1,3'-indoline]-3-carboxylate 2-(((1*S*,3*R*,4*R*)-7'-bromo-3-(ethoxycarbonyl)-1'-methyl-2'-oxo-4-vinylspiro[cyclopentane-1,3'-indolin]-3-yl)-12-azaneyl)carbonyl)benzoic acid **3u''**:** White solid, 11.3 mg, 11% yield, 87% ee;  $[\alpha]_{\text{D}}^{25} = +62.93$  ( $c = 0.50$ ,  $\text{CH}_2\text{Cl}_2$ ), m.p. 76.6 - 77.5 °C. The ee was determined by chiral HPLC (Chiralcel AD-H, Hexane/*i*-PrOH = 85/15, flow rate 1.5 mL/min,  $\lambda = 254$  nm,  $t_{(1S,2R,4S)-3u''} = 8.7$  min (major),  $t_{(1R,2S,4R)-3u''} = 9.4$  min (minor)).  $^1\text{H NMR}$  (400 MHz,  $\text{CDCl}_3$ )  $\delta$  7.94 (d,  $J = 7.2$  Hz, 1H), 7.87 - 7.78 (m, 2H), 7.77 - 7.70 (m, 2H), 7.37 (d,  $J = 8.0$  Hz, 1H), 7.02 - 6.95 (m, 1H), 5.94 - 5.77 (m, 1H), 5.11 (d,  $J = 17.4$  Hz, 1H), 4.96 (d,  $J = 10.5$  Hz, 1H), 4.71 - 4.58 (m, 1H), 4.46 - 4.26 (m, 2H), 3.68 (d,  $J = 15.5$  Hz, 1H), 3.56 (s, 3H), 2.76 (d,  $J = 15.4$  Hz, 1H), 2.70 - 2.59 (m, 1H), 2.26 - 2.17 (m, 1H), 1.33 - 1.28 (m, 3H).  $^{13}\text{C NMR}$  (101 MHz,  $\text{CDCl}_3$ )  $\delta$  181.5, 170.6, 168.8, 140.8, 135.9, 135.0, 134.4, 133.8, 131.4, 124.3, 123.4, 123.1, 117.8, 102.0, 71.9, 62.2, 52.0, 48.1, 43.5, 42.5, 29.9, 14.1. HRMS (ESI)  $m/z$ : calculated for  $\text{C}_{26}\text{H}_{23}\text{N}_2\text{O}_5\text{NaBr}$   $[\text{M}+\text{Na}]^+$ : 545.0688, found: 545.0692.

## 5. Procedure for the synthesis of compound 4

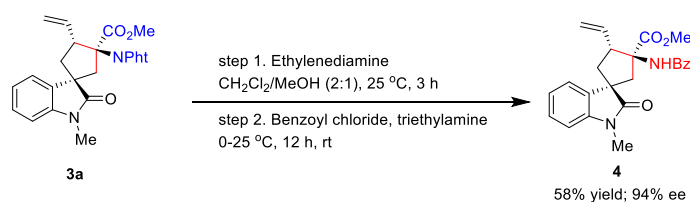

**Step1.** Ethylenediamine (0.5 mmol) was added dropwise to a solution of compound **3a** (0.25 mmol) in  $\text{CH}_2\text{Cl}_2/\text{MeOH}$  (2:1, v/v, 3 mL) at room temperature. The mixture was stirred for 6 h, and then purified by flash column chromatography (petroleum hexane /ethyl acetate = 2:1) to afford the deprotected intermediate.

**Step2.** To a solution of intermediate (0.15 mmol) and triethylamine (0.20 mmol) in anhydrous THF (4 mL) at 0 °C, benzoyl chloride (0.18 mmol) was added dropwise. The reaction mixture was warmed to room temperature and stirred for 12 h. The reaction was quenched by adding saturated aqueous  $\text{NH}_4\text{Cl}$  (10 mL), and the mixture was extracted with  $\text{CH}_2\text{Cl}_2$  ( $3 \times 10$  mL). The combined organic phases were washed with saturated brine, dried over anhydrous  $\text{Na}_2\text{SO}_4$ , filtered and concentrated in vacuo. Purification by flash column chromatography (petroleum hexane /ethyl acetate = 5:1) afforded the compound **4**.

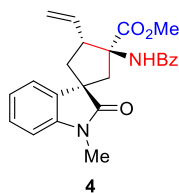

**Methyl (1*S*,3*S*,4*R*)-3-benzamido-1'-methyl-2'-oxo-4-vinylspiro[cyclopentane-1,3'-indoline]-3-carboxylate 4** : White solid, 58.0 mg, 58% yield, 94% ee;  $[\alpha]_{\text{D}}^{25} = -11.73$  ( $c = 0.50$ ,  $\text{CH}_2\text{Cl}_2$ ), m.p. 80.2 - 80.9 °C. The ee was determined by chiral HPLC (Chiralcel AD-H, Hexane/*i*-PrOH = 93/7, flow rate 0.8 mL/min,  $\lambda = 254$  nm,  $t_{(1*S*,2*R*,4*R*)-4} = 31.9$  min (major),  $t_{(1*R*,2*S*,4*S*)-4} = 41.6$  min (minor)).  $^1\text{H}$  NMR (400 MHz,  $\text{CDCl}_3$ )  $\delta$  7.87 - 7.73 (m, 3H), 7.48 - 7.43 (m, 1H), 7.43 - 7.36 (m, 2H), 7.31 - 7.23 (m, 1H), 7.22 - 7.08 (m, 2H), 6.81 (d,  $J = 7.7$  Hz, 1H), 5.81 - 5.65 (m, 1H), 5.28 (d,  $J = 17.0$  Hz, 1H), 5.17 (d,  $J = 10.4$  Hz, 1H), 3.92 - 3.79 (m, 1H), 3.76 (s, 3H), 3.43 (d,  $J = 14.9$  Hz, 1H), 3.18 (s, 3H), 2.43 - 2.27 (m, 2H), 2.11 - 2.01 (m, 1H).  $^{13}\text{C}$  NMR (101 MHz,  $\text{CDCl}_3$ )  $\delta$  182.3, 173.1, 168.0, 143.1, 134.8, 133.9, 133.5, 131.8, 128.5, 128.1, 127.3, 123.9, 123.4, 118.4, 107.8, 68.7, 52.6, 52.4, 52.0, 47.3, 41.3, 26.4. HRMS (ESI)  $m/z$ : calculated for  $\text{C}_{24}\text{H}_{24}\text{N}_2\text{O}_4\text{Na}$   $[\text{M}+\text{Na}]^+$ : 427.1634, found: 427.1638.

## 6. Procedure for the synthesis of compound 5

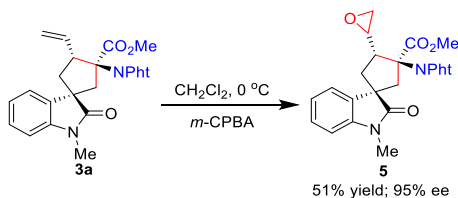

A solution of compound **3a** (0.2 mmol) in dichloromethane (5 mL) was cooled to 0 °C in an ice bath. To this stirring solution was added a solution of *m*-chloroperbenzoic acid (0.52 mmol) in dichloromethane (5 mL) dropwise. The reaction mixture was stirred at 0 °C for 24 h. Upon completion, the reaction mixture was washed with a saturated aqueous sodium  $\text{NaHCO}_3$  solution ( $2 \times 20$  mL). The organic layer was separated, washed with water ( $2 \times 10$  mL), and dried over anhydrous  $\text{NaSO}_4$ . After filtration, the solution was concentrated under reduced pressure. Purification by flash column chromatography (petroleum hexane /ethyl acetate = 10:1) afforded the compound **5**.

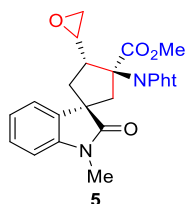

**Methyl (1*S*,3*S*,4*S*)-3-(1,3-dioxoisindolin-2-yl)-1',4-dimethyl-2'-oxospiro[cyclopentane-1,3'-indoline]-3-carboxylate 5** : Colorless oil, 27.0 mg, 51% yield, 95% ee;  $[\alpha]_{\text{D}}^{25} = -49.82$  ( $c = 0.50$ ,  $\text{CH}_2\text{Cl}_2$ ). The ee was determined by chiral HPLC (Chiralcel AD-H, Hexane/*i*-PrOH = 93/7, flow rate 0.8 mL/min,  $\lambda = 254$  nm,  $t_{(1*S*,2*R*,4*R*)-5} = 99.4$  min (minor),  $t_{(1*R*,2*S*,4*S*)-5} = 118.1$  min (major)).  $^1\text{H}$  NMR (400 MHz,  $\text{CDCl}_3$ )  $\delta$  7.91 - 7.84 (m, 2H), 7.80 - 7.75 (m, 2H), 7.25 - 7.19 (m, 1H), 7.09 (d,  $J = 7.3$  Hz, 1H), 6.98 - 6.86 (m, 1H), 6.80 (d,  $J = 7.7$  Hz, 1H), 3.93 - 3.83 (m, 4H), 3.76 - 3.71 (m, 1H), 3.51 (d,  $J = 15.2$  Hz, 1H), 3.21 (s, 3H), 3.01 (d,  $J = 15.2$  Hz, 1H), 2.82 - 2.75 (m, 1H), 2.60 - 2.55 (m, 1H), 2.48 (dd,  $J = 13.3, 8.7$  Hz, 1H), 2.21 (dd,  $J = 13.3, 7.0$  Hz, 1H).  $^{13}\text{C}$  NMR (101 MHz,

CDCl<sub>3</sub>)  $\delta$  180.2, 170.3, 168.9, 142.9, 135.9, 134.6, 131.7, 128.2, 123.7, 123.1, 122.5, 108.2, 72.6, 53.3, 51.7, 51.1, 48.2, 46.0, 45.7, 39.7, 26.6. HRMS (ESI)  $m/z$ : calculated for C<sub>25</sub>H<sub>22</sub>N<sub>2</sub>O<sub>6</sub>Na [M+Na]<sup>+</sup>: 469.1376, found: 469.1380.

## 7. Procedure for the synthesis of compound 6

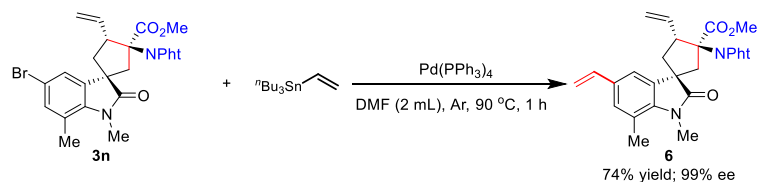

In a 4 mL flame-dried vial with a stir bar, a mixture of compound **3n** (0.10 mmol), tetrakis (triphenylphosphine) palladium(0) (5 mol%) and allyltributylstannane (0.2 mmol) in 2.0 mL anhydrous DMF was heated at 90 °C for 1 h under an inert atmosphere, which was monitored by TLC. After completion of the reaction, the mixture was cooled to room temperature and then purified by column chromatography on silica gel (petroleum hexane /ethyl acetate = 10:1 to 5:1) to afford the target compound **6**.

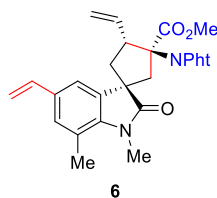

**Methyl (1*S*,3*S*,4*R*)-3-(1,3-dioxoisindolin-2-yl)-1',7'-dimethyl-2'-oxo-4,5'-divinylspiro[cyclopentane-1,3'-indoline]-3-carboxylate 6** : White solid , 30.0 mg, 74% yield, 99% ee;  $[\alpha]_D^{25} = -56.26$  ( $c = 0.50$ , CH<sub>2</sub>Cl<sub>2</sub>), m.p. 97.6 - 98.0 °C. The ee was determined by chiral HPLC (Chiralcel AD-H, Hexane/*i*-PrOH = 90/10, flow rate 1.0 mL/min,  $\lambda = 254$  nm,  $t_{(1*S*,2*R*,4*R*)-6} = 20.7$  min (major),  $t_{(1*R*,2*S*,4*S*)-6} = 38.5$  min (minor)). <sup>1</sup>H NMR (400 MHz, CDCl<sub>3</sub>)  $\delta$  7.88 - 7.79 (m, 2H), 7.76 - 7.68 (m, 3H), 7.09 - 6.98 (m, 1H), 6.77 - 6.61 (m, 1H), 6.18 - 6.08 (m, 1H), 5.74 (d,  $J = 17.6$  Hz, 1H), 5.51 - 5.41 (m, 1H), 5.22 - 5.09 (m, 3H), 3.70 (s, 3H), 3.52 (d,  $J = 15.0$  Hz, 1H), 3.43 (s, 3H), 2.55 (s, 3H), 2.51 - 2.41 (m, 2H), 2.16 - 2.08 (m, 1H). <sup>13</sup>C NMR (101 MHz, CDCl<sub>3</sub>)  $\delta$  182.5, 172.1, 168.5, 140.7, 136.4, 136.0, 134.4, 134.2, 133.0, 131.9, 130.3, 123.4, 119.3, 119.2, 116.3, 112.5, 72.5, 52.6, 50.6, 48.5, 44.5, 40.9, 29.6, 19.0. HRMS (ESI)  $m/z$ : calculated for C<sub>28</sub>H<sub>27</sub>N<sub>2</sub>O<sub>5</sub> [M+H]<sup>+</sup>: 471.1920, found: 471.1922.

### **8. Crystallographic information for compounds of 3n, 3n'and 3n''**

Sample preparation: A solution of each compound **3n, 3n'and 3n''** in a mixed solvent of EA (1 mL), DCM (1 mL) and petroleum ether (3 mL) was placed in a vial (15 mL). The single crystal was obtained by slowly evaporating the solvent at room temperature under the air condition.

## 8.1 Crystallographic information for compound 3n

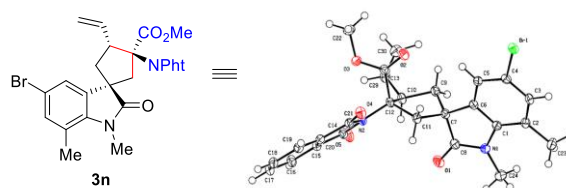

**Table 1 Crystal data and structure refinement for 3n.**

|                                             |                                                                 |
|---------------------------------------------|-----------------------------------------------------------------|
| Identification code                         | CCDC 2528101                                                    |
| Empirical formula                           | C <sub>26</sub> H <sub>23</sub> BrN <sub>2</sub> O <sub>5</sub> |
| Formula weight                              | 523.37                                                          |
| Temperature/K                               | 100.00(10)                                                      |
| Crystal system                              | orthorhombic                                                    |
| Space group                                 | P2 <sub>1</sub> 2 <sub>1</sub> 2 <sub>1</sub>                   |
| a/Å                                         | 12.13710(10)                                                    |
| b/Å                                         | 12.75540(10)                                                    |
| c/Å                                         | 14.93530(10)                                                    |
| α/°                                         | 90                                                              |
| β/°                                         | 90                                                              |
| γ/°                                         | 90                                                              |
| Volume/Å <sup>3</sup>                       | 2312.19(3)                                                      |
| Z                                           | 4                                                               |
| ρ <sub>calc</sub> /cm <sup>3</sup>          | 1.503                                                           |
| μ/mm <sup>-1</sup>                          | 2.771                                                           |
| F(000)                                      | 1072.0                                                          |
| Crystal size/mm <sup>3</sup>                | 0.14 × 0.13 × 0.11                                              |
| Radiation                                   | Cu Kα (λ = 1.54184)                                             |
| 2θ range for data collection/°              | 9.118 to 149.38                                                 |
| Index ranges                                | -15 ≤ h ≤ 14, -11 ≤ k ≤ 15, -18 ≤ l ≤ 18                        |
| Reflections collected                       | 21994                                                           |
| Independent reflections                     | 4616 [R <sub>int</sub> = 0.0163, R <sub>sigma</sub> = 0.0108]   |
| Data/restraints/parameters                  | 4616/0/318                                                      |
| Goodness-of-fit on F <sup>2</sup>           | 1.030                                                           |
| Final R indexes [I ≥ 2σ (I)]                | R <sub>1</sub> = 0.0170, wR <sub>2</sub> = 0.0454               |
| Final R indexes [all data]                  | R <sub>1</sub> = 0.0171, wR <sub>2</sub> = 0.0455               |
| Largest diff. peak/hole / e Å <sup>-3</sup> | 0.24/-0.20                                                      |
| Flack/Hooft parameter                       | -0.025(3)/-0.006(2)                                             |

## 8.2 Crystallographic information for compound 3n'

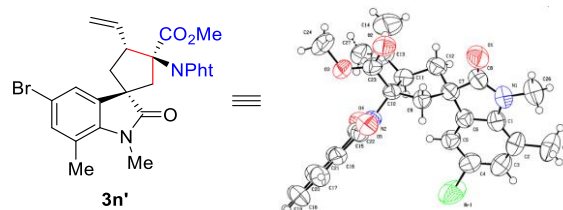

**Table 2 Crystal data and structure refinement for 3n'.**

|                                             |                                                                 |
|---------------------------------------------|-----------------------------------------------------------------|
| Identification code                         | CCDC 2528102                                                    |
| Empirical formula                           | C <sub>26</sub> H <sub>23</sub> BrN <sub>2</sub> O <sub>5</sub> |
| Formula weight                              | 523.37                                                          |
| Temperature/K                               | 293.01(10)                                                      |
| Crystal system                              | orthorhombic                                                    |
| Space group                                 | P2 <sub>1</sub> 2 <sub>1</sub> 2 <sub>1</sub>                   |
| a/Å                                         | 10.6564(2)                                                      |
| b/Å                                         | 10.6915(3)                                                      |
| c/Å                                         | 21.0319(4)                                                      |
| α/°                                         | 90                                                              |
| β/°                                         | 90                                                              |
| γ/°                                         | 90                                                              |
| Volume/Å <sup>3</sup>                       | 2396.23(9)                                                      |
| Z                                           | 4                                                               |
| ρ <sub>calc</sub> /cm <sup>3</sup>          | 1.451                                                           |
| μ/mm <sup>-1</sup>                          | 2.674                                                           |
| F(000)                                      | 1072.0                                                          |
| Crystal size/mm <sup>3</sup>                | 0.14 × 0.12 × 0.1                                               |
| Radiation                                   | Cu Kα (λ = 1.54184)                                             |
| 2θ range for data collection/°              | 8.408 to 145.916                                                |
| Index ranges                                | -13 ≤ h ≤ 13, -13 ≤ k ≤ 12, -25 ≤ l ≤ 25                        |
| Reflections collected                       | 25238                                                           |
| Independent reflections                     | 4569 [R <sub>int</sub> = 0.0406, R <sub>sigma</sub> = 0.0184]   |
| Data/restraints/parameters                  | 4569/1/320                                                      |
| Goodness-of-fit on F <sup>2</sup>           | 1.072                                                           |
| Final R indexes [I ≥ 2σ (I)]                | R <sub>1</sub> = 0.0435, wR <sub>2</sub> = 0.1233               |
| Final R indexes [all data]                  | R <sub>1</sub> = 0.0479, wR <sub>2</sub> = 0.1276               |
| Largest diff. peak/hole / e Å <sup>-3</sup> | 0.32/-0.68                                                      |
| Flack/Hooft parameter                       | -0.039(7)/-0.012(5)                                             |

### 8.3 Crystallographic information for compound 3n''

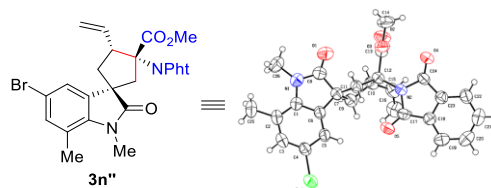

**Table 3 Crystal data and structure refinement for 3n''.**

|                                             |                                                                 |
|---------------------------------------------|-----------------------------------------------------------------|
| Identification code                         | CCDC 2528103                                                    |
| Empirical formula                           | C <sub>26</sub> H <sub>23</sub> BrN <sub>2</sub> O <sub>5</sub> |
| Formula weight                              | 523.37                                                          |
| Temperature/K                               | 293.00(10)                                                      |
| Crystal system                              | tetragonal                                                      |
| Space group                                 | P4 <sub>3</sub> 2 <sub>1</sub> 2                                |
| a/Å                                         | 11.22494(5)                                                     |
| b/Å                                         | 11.22494(5)                                                     |
| c/Å                                         | 40.1510(4)                                                      |
| α/°                                         | 90                                                              |
| β/°                                         | 90                                                              |
| γ/°                                         | 90                                                              |
| Volume/Å <sup>3</sup>                       | 5059.00(7)                                                      |
| Z                                           | 8                                                               |
| ρ <sub>calc</sub> /cm <sup>3</sup>          | 1.374                                                           |
| μ/mm <sup>-1</sup>                          | 2.533                                                           |
| F(000)                                      | 2144.0                                                          |
| Crystal size/mm <sup>3</sup>                | 0.14 × 0.13 × 0.12                                              |
| Radiation                                   | Cu Kα (λ = 1.54184)                                             |
| 2θ range for data collection/°              | 8.178 to 146.426                                                |
| Index ranges                                | -13 ≤ h ≤ 13, -13 ≤ k ≤ 13, -46 ≤ l ≤ 38                        |
| Reflections collected                       | 54525                                                           |
| Independent reflections                     | 4812 [R <sub>int</sub> = 0.0328, R <sub>sigma</sub> = 0.0133]   |
| Data/restraints/parameters                  | 4812/0/318                                                      |
| Goodness-of-fit on F <sup>2</sup>           | 1.021                                                           |
| Final R indexes [I >= 2σ (I)]               | R <sub>1</sub> = 0.0275, wR <sub>2</sub> = 0.0787               |
| Final R indexes [all data]                  | R <sub>1</sub> = 0.0287, wR <sub>2</sub> = 0.0794               |
| Largest diff. peak/hole / e Å <sup>-3</sup> | 0.18/-0.33                                                      |
| Flack/Hooft parameter                       | -0.017(4)/-0.021(3)                                             |

## 9. NMR and HPLC spectra for compounds

### 9.1 NMR spectra for compounds

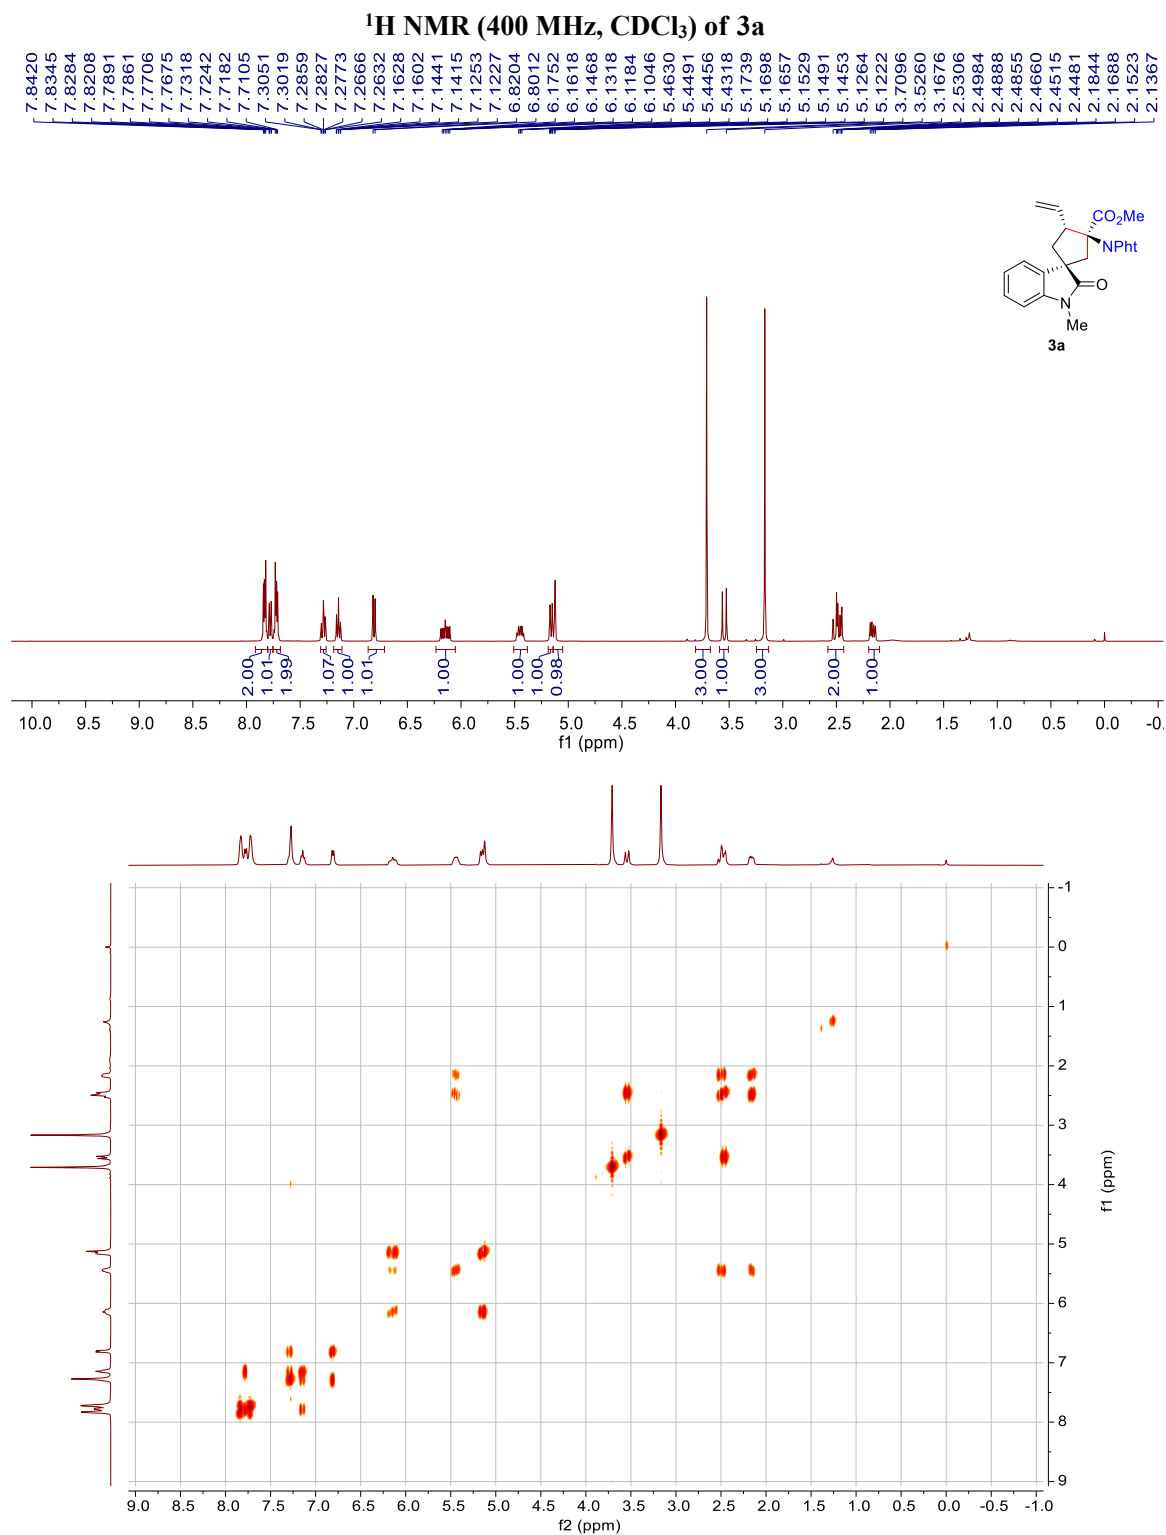

**<sup>13</sup>C NMR (101 MHz, CDCl<sub>3</sub>) of 3a**

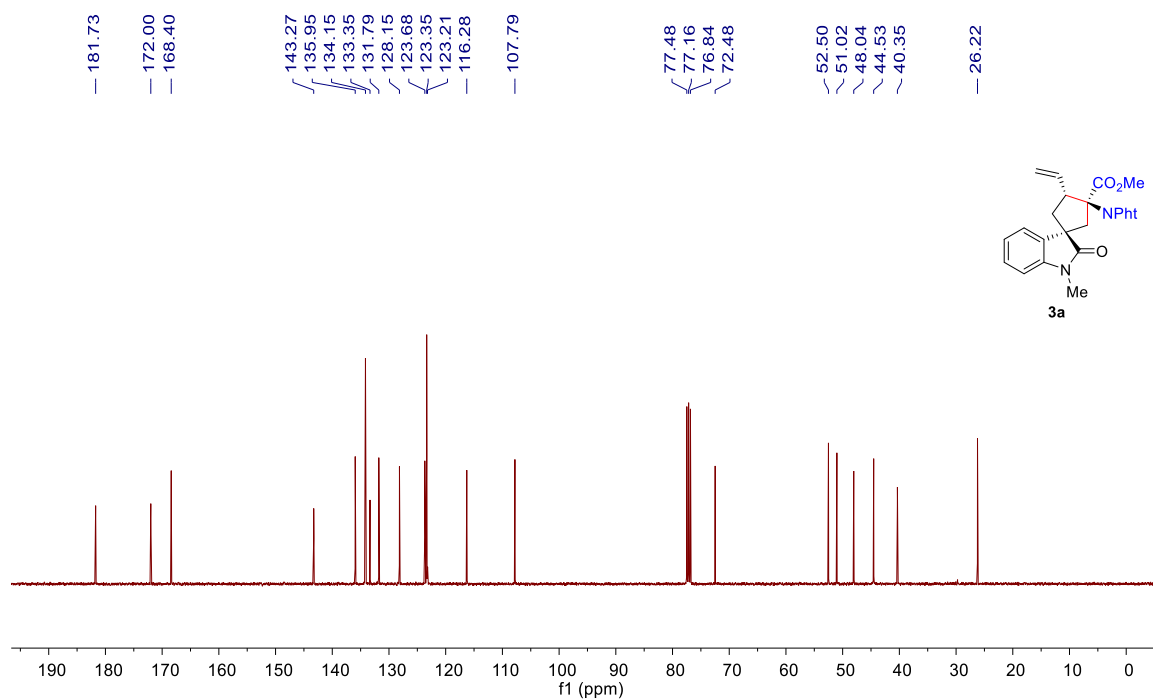

<sup>1</sup>H NMR (400 MHz, CDCl<sub>3</sub>) of 3a'

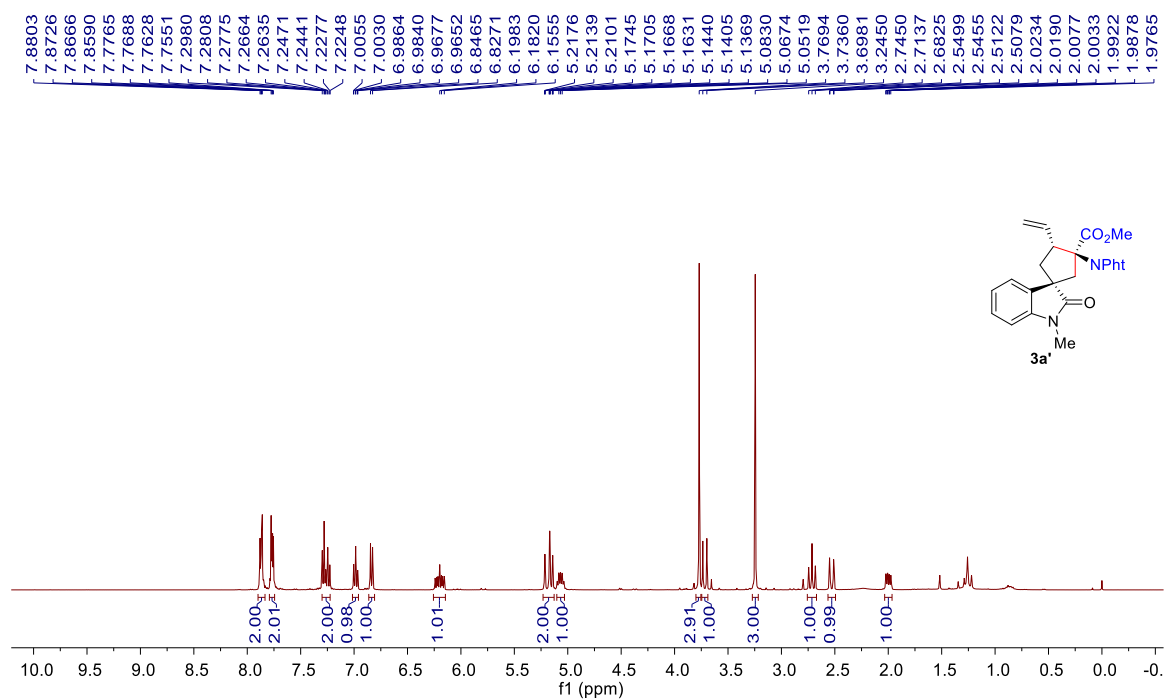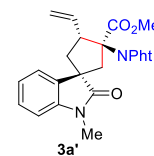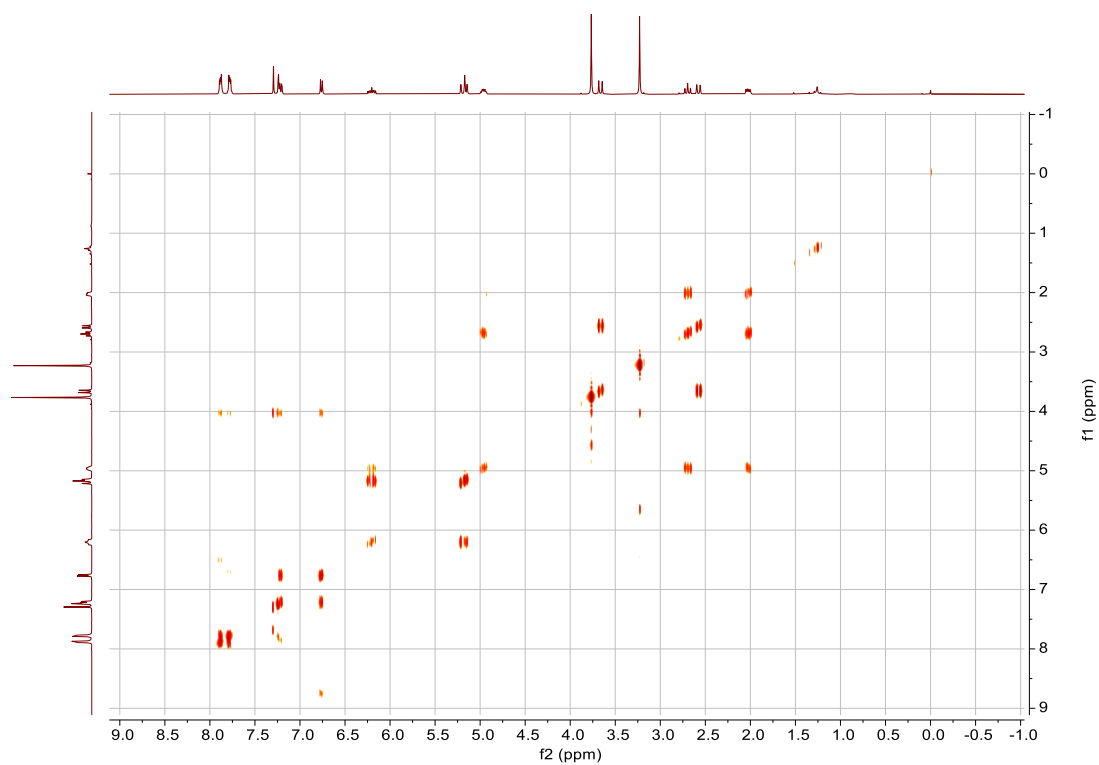

**<sup>13</sup>C NMR (101 MHz, CDCl<sub>3</sub>) of 3a'**

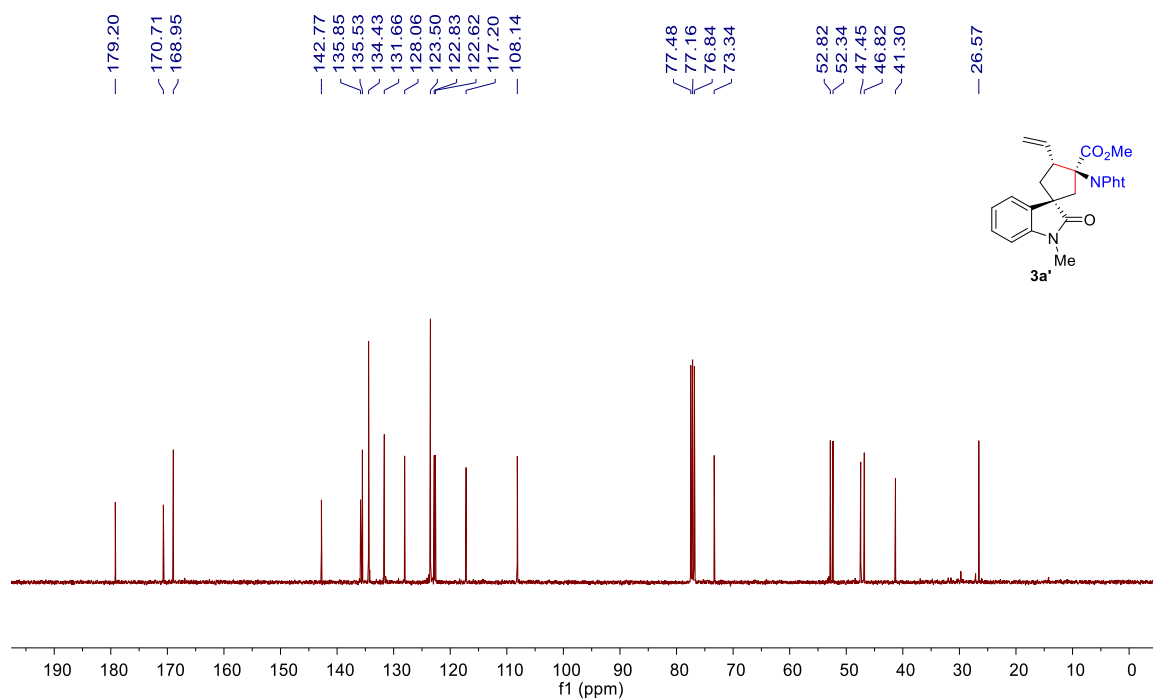



<sup>13</sup>C NMR (101 MHz, CDCl<sub>3</sub>) of 3a''

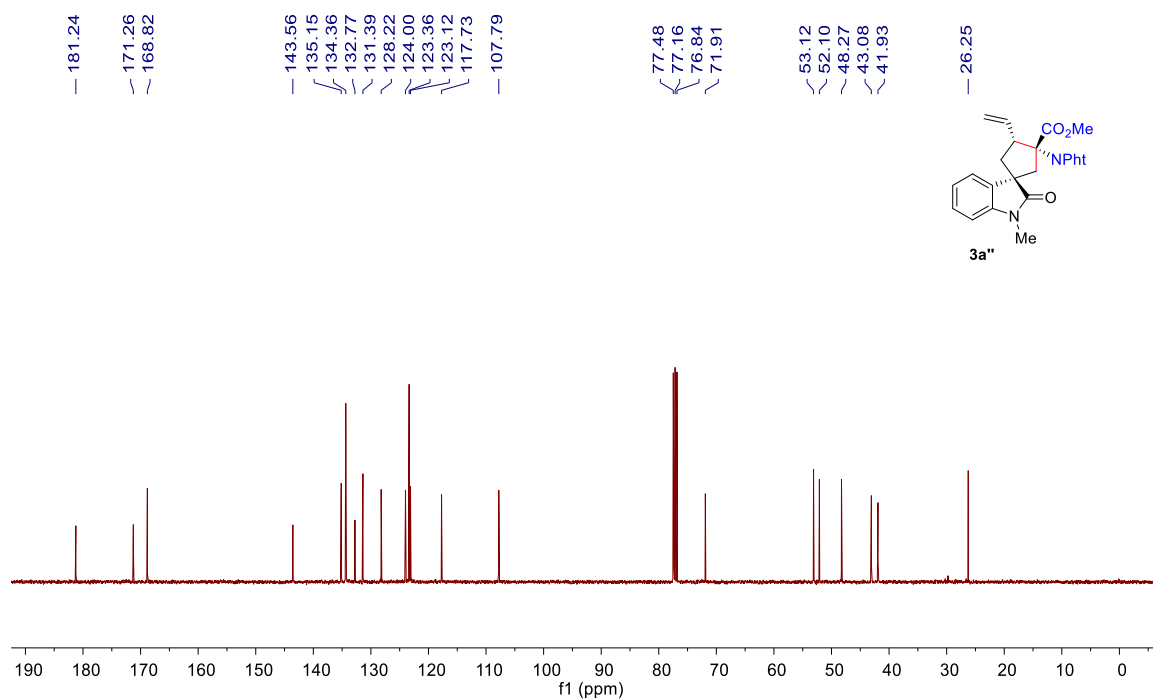

**<sup>1</sup>H NMR (400 MHz, CDCl<sub>3</sub>) of 3b**

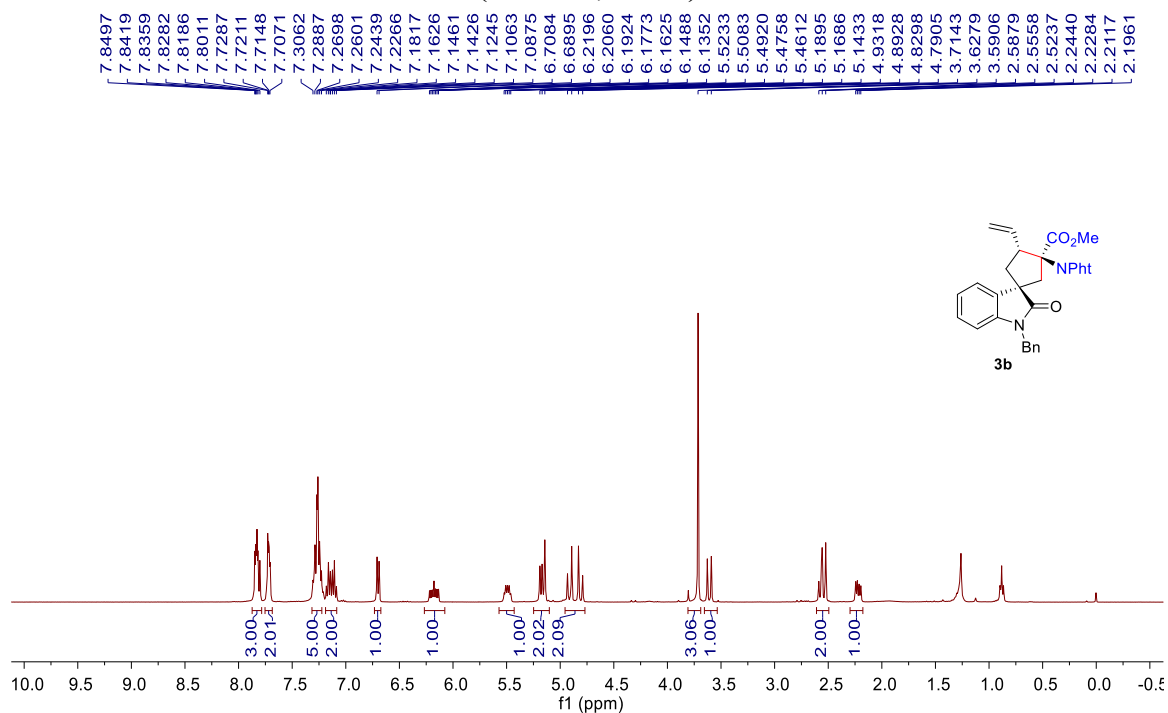

**<sup>13</sup>C NMR (101 MHz, CDCl<sub>3</sub>) of 3b**

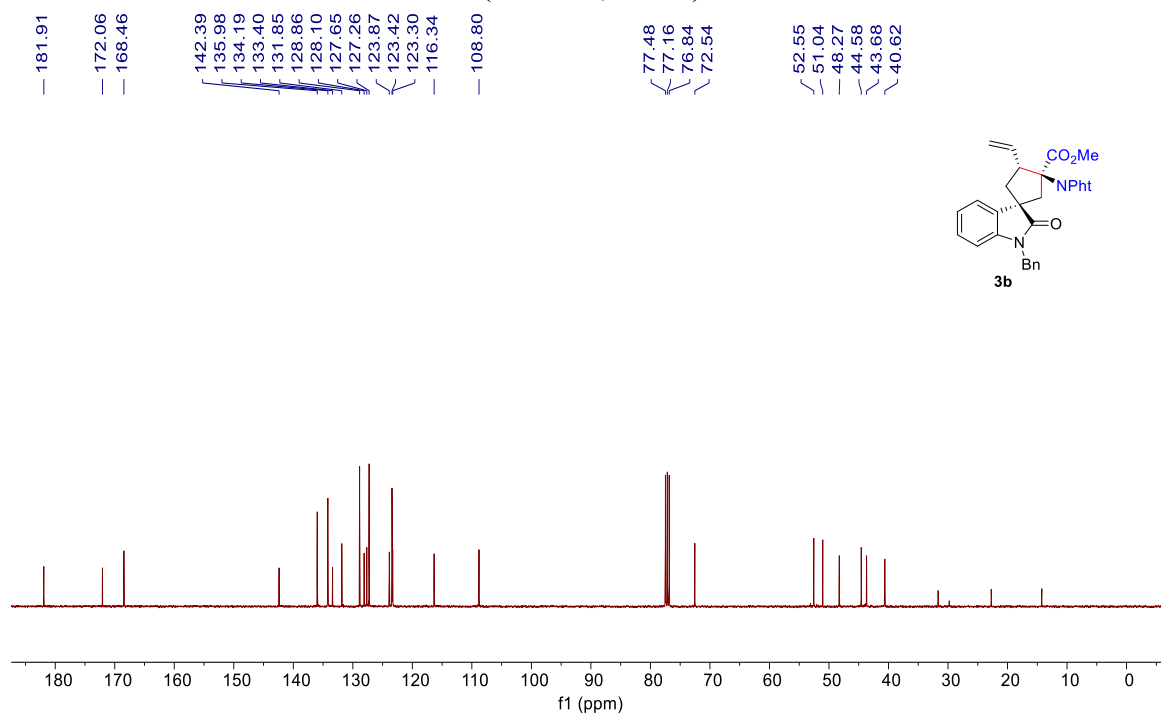

**<sup>1</sup>H NMR (400 MHz, CDCl<sub>3</sub>) of 3b'**

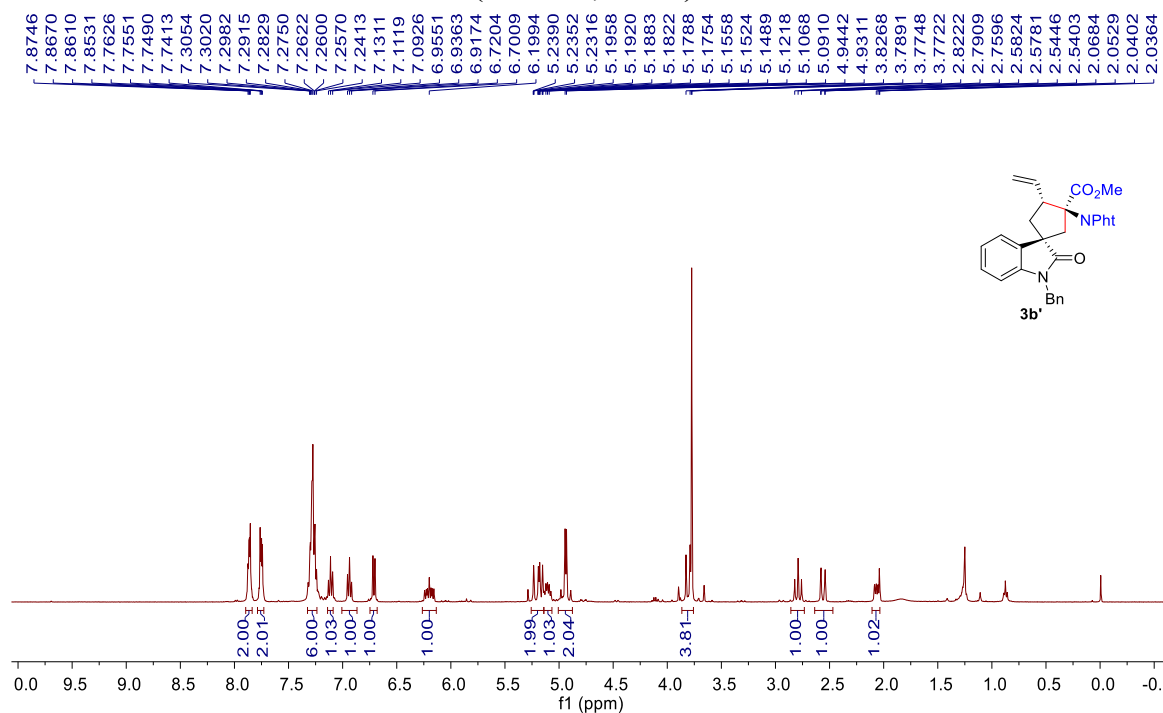

**<sup>13</sup>C NMR (101 MHz, CDCl<sub>3</sub>) of 3b'**

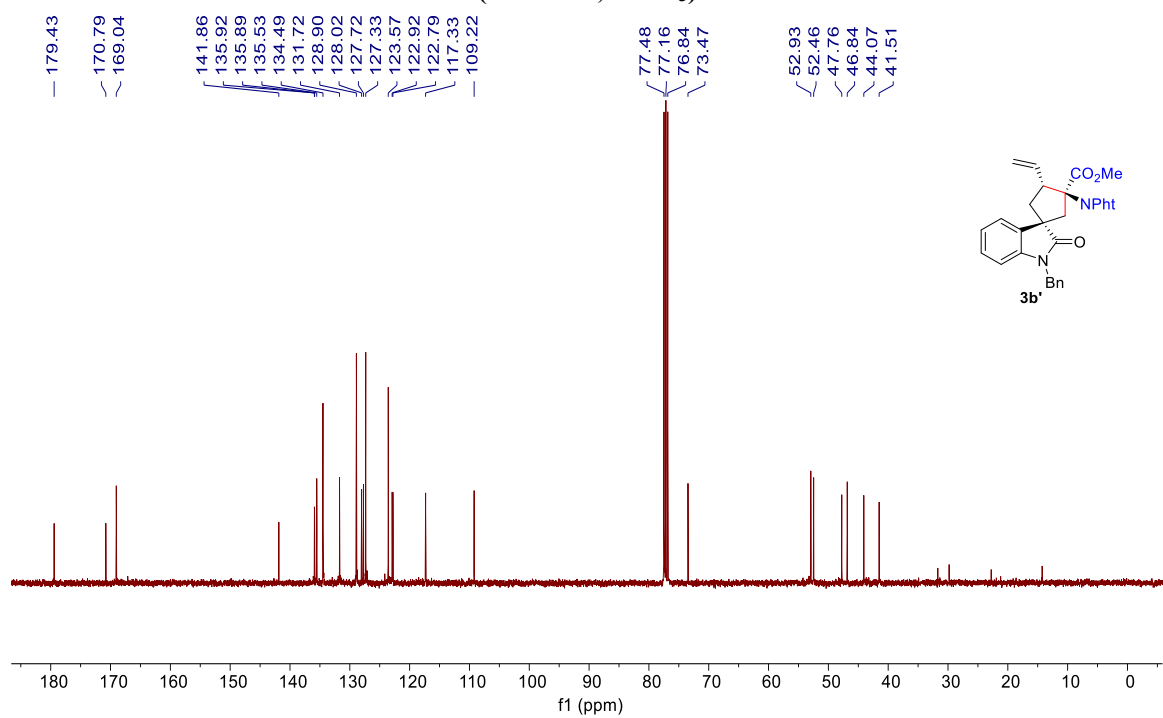

### <sup>1</sup>H NMR (400 MHz, CDCl<sub>3</sub>) of 3b''

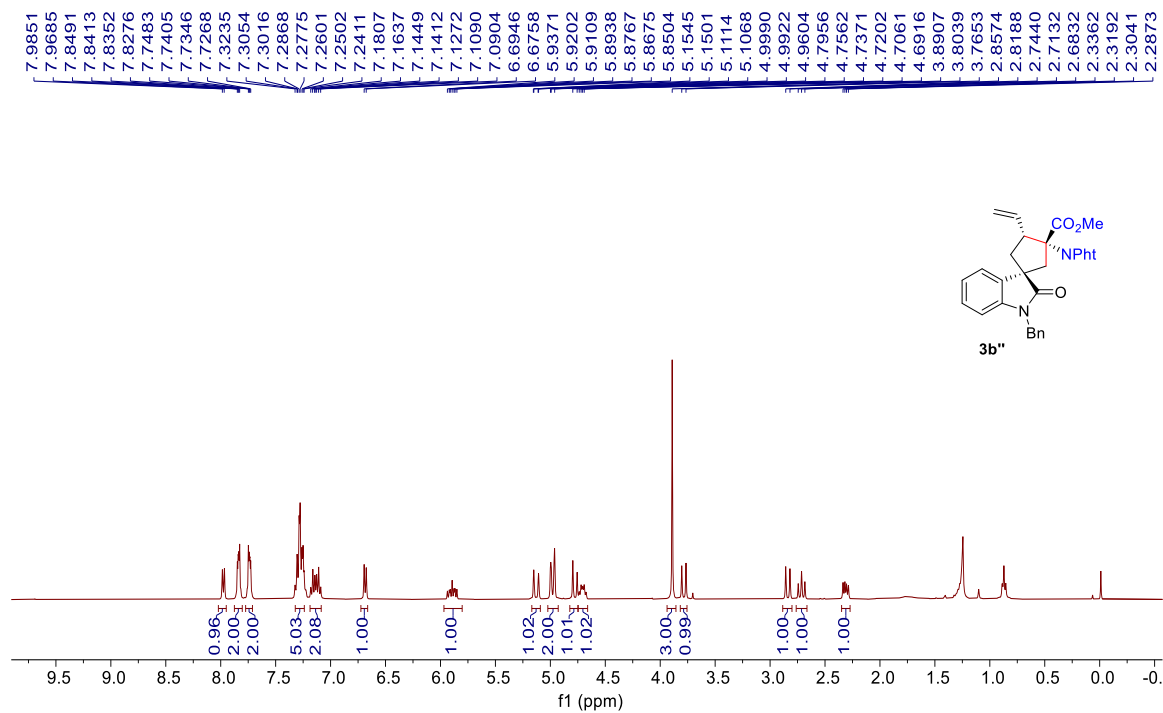

### <sup>13</sup>C NMR (101 MHz, CDCl<sub>3</sub>) of 3b''

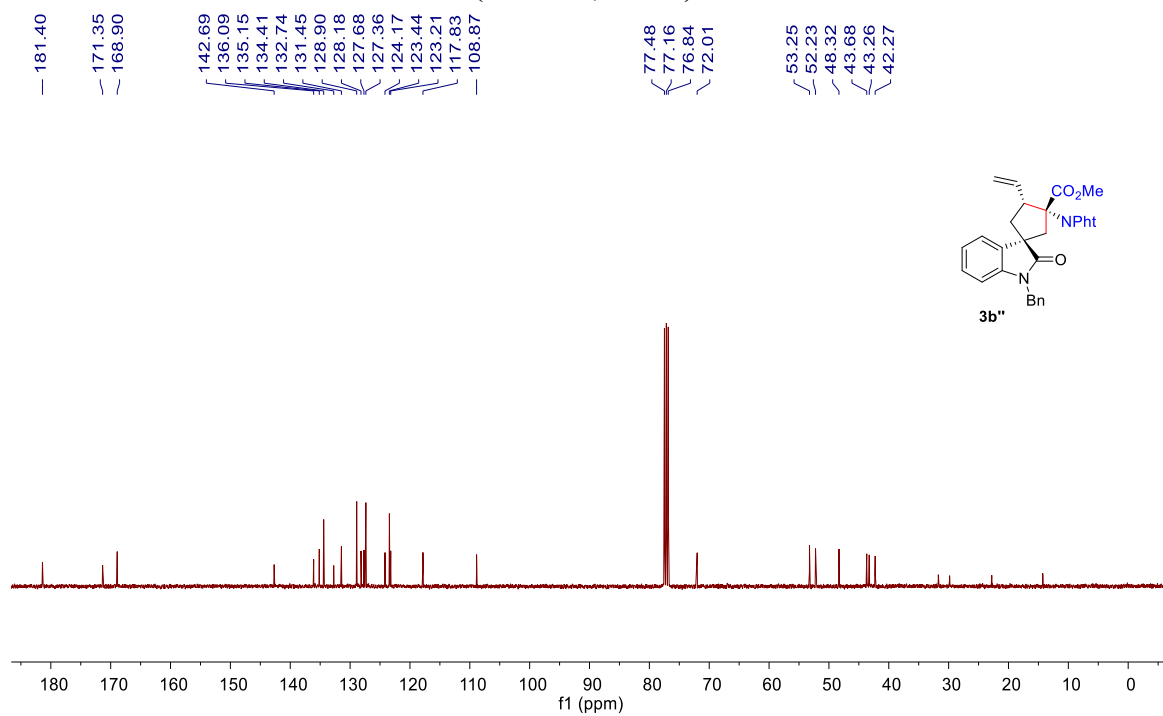

### <sup>1</sup>H NMR (400 MHz, CDCl<sub>3</sub>) of 3c

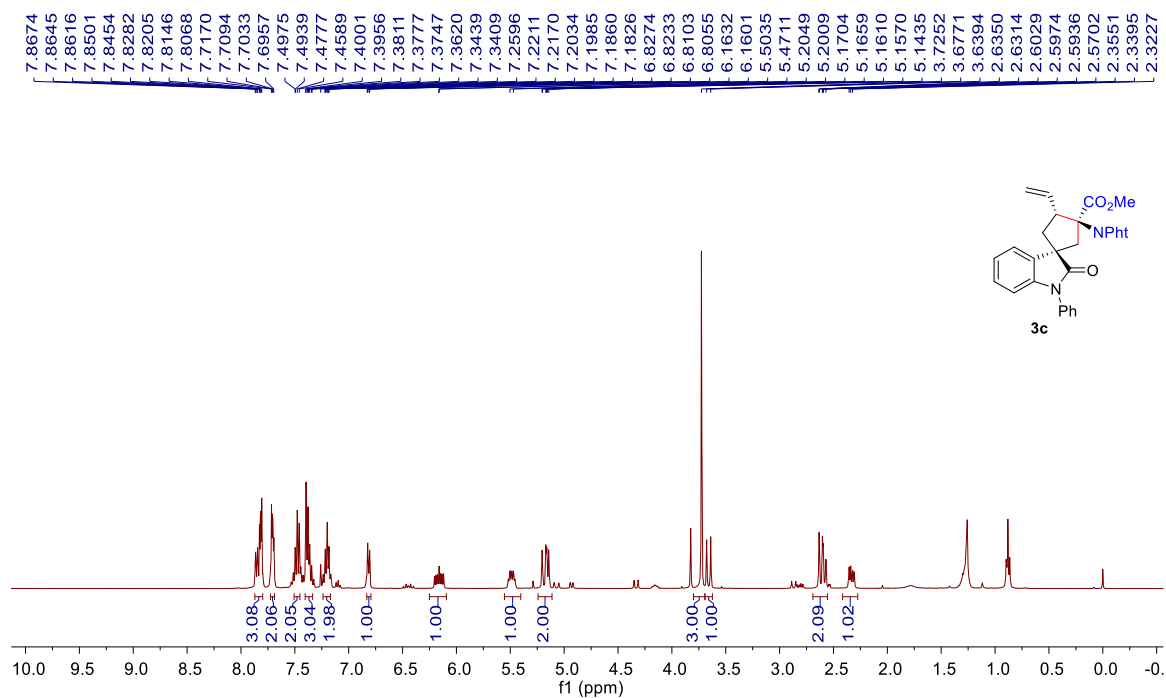

### <sup>13</sup>C NMR (101 MHz, CDCl<sub>3</sub>) of 3c

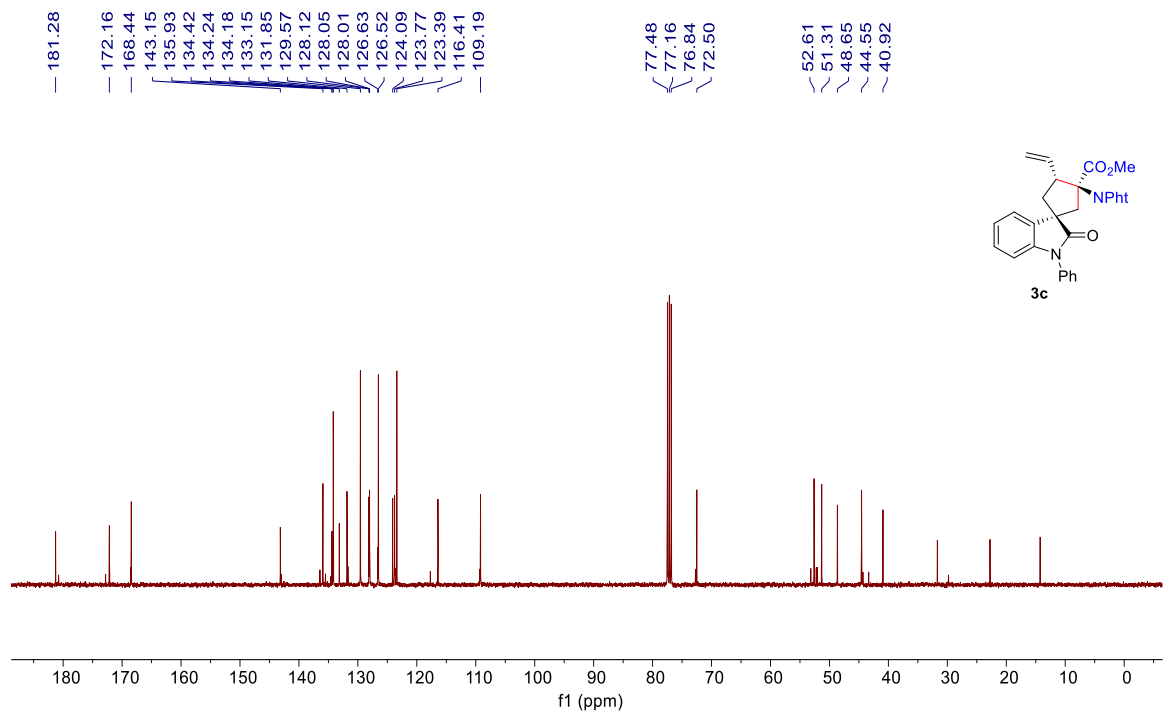

<sup>1</sup>H NMR (400 MHz, CDCl<sub>3</sub>) of 3c'

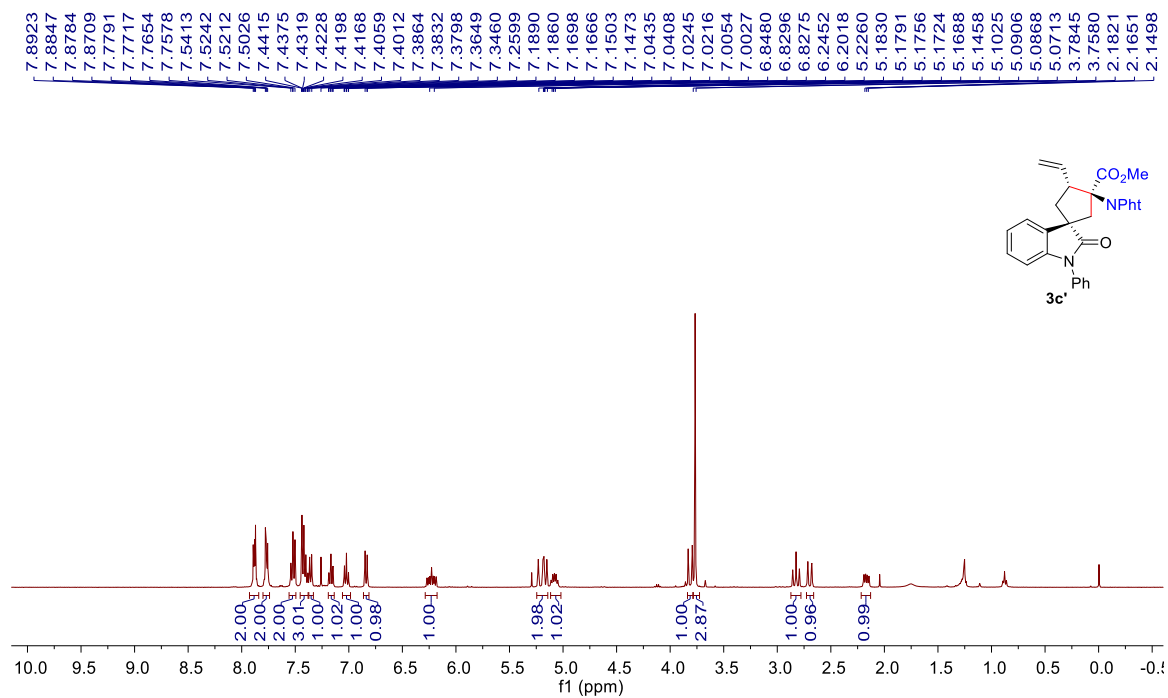

<sup>13</sup>C NMR (101 MHz, CDCl<sub>3</sub>) of 3c'

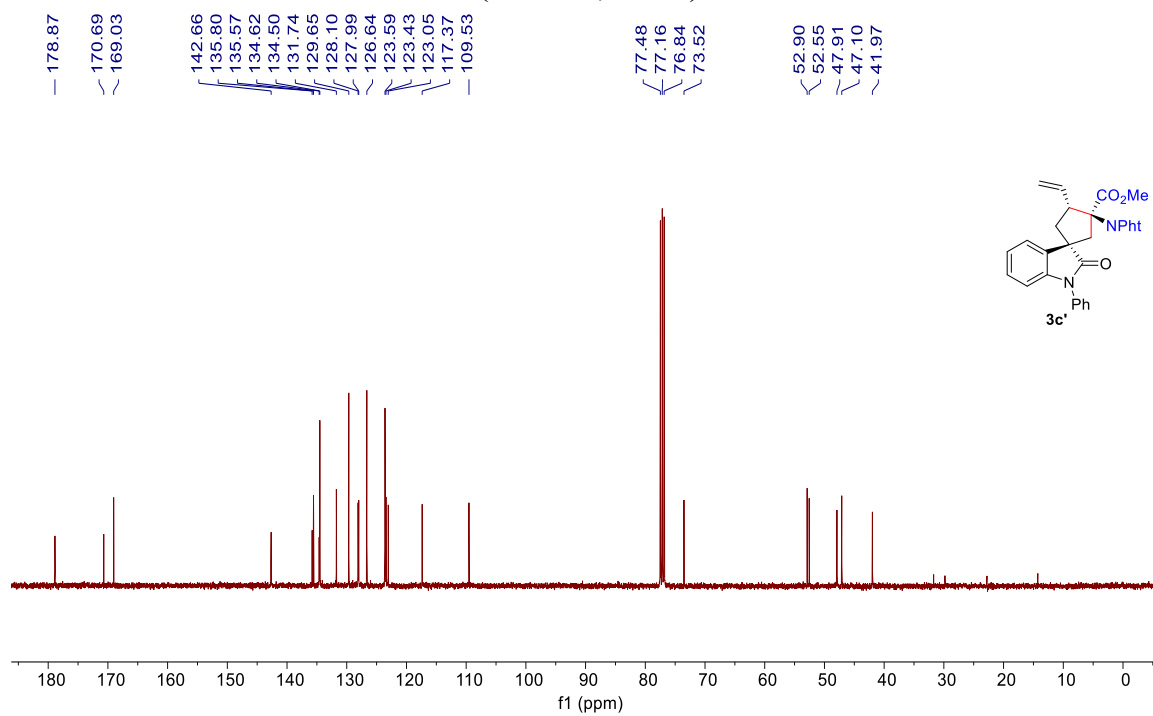

**<sup>1</sup>H NMR (400 MHz, CDCl<sub>3</sub>) of 3c''**

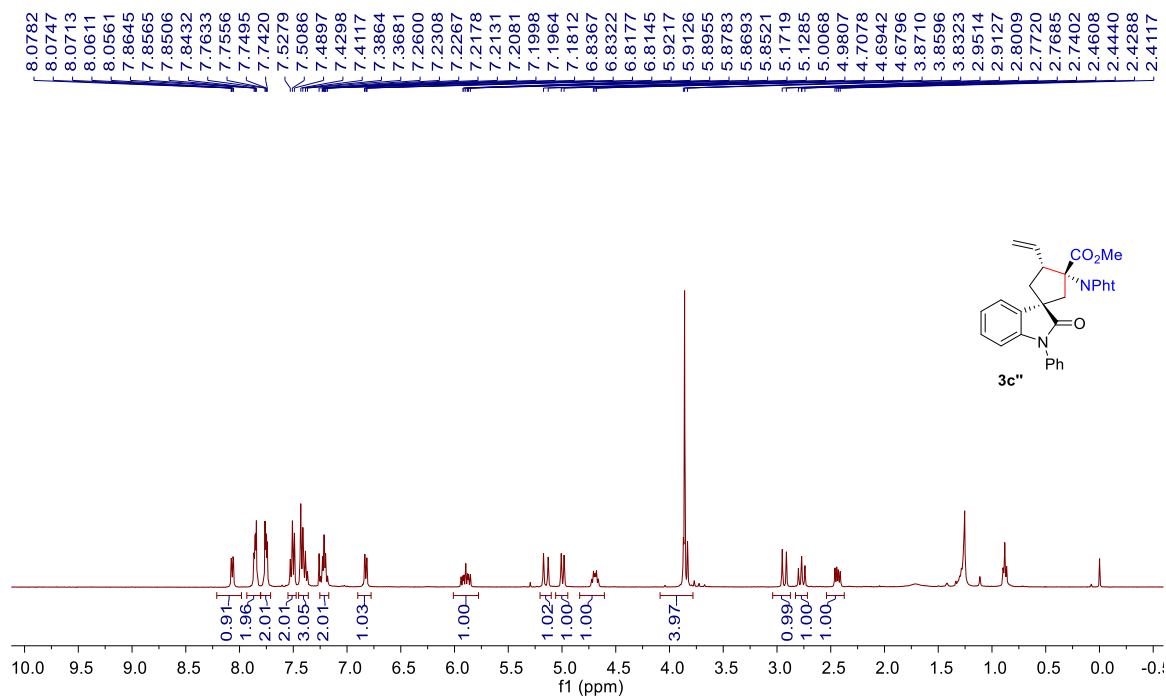

**<sup>13</sup>C NMR (101 MHz, CDCl<sub>3</sub>) of 3c''**

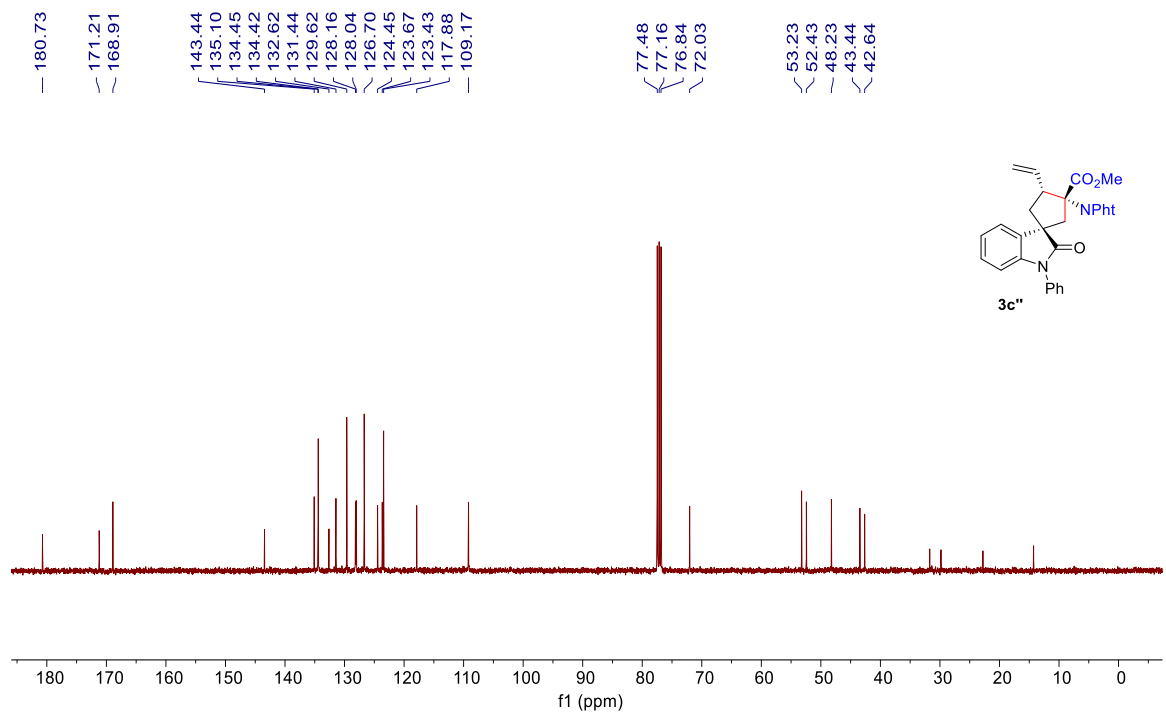

<sup>1</sup>H NMR (400 MHz, CDCl<sub>3</sub>) of 3d

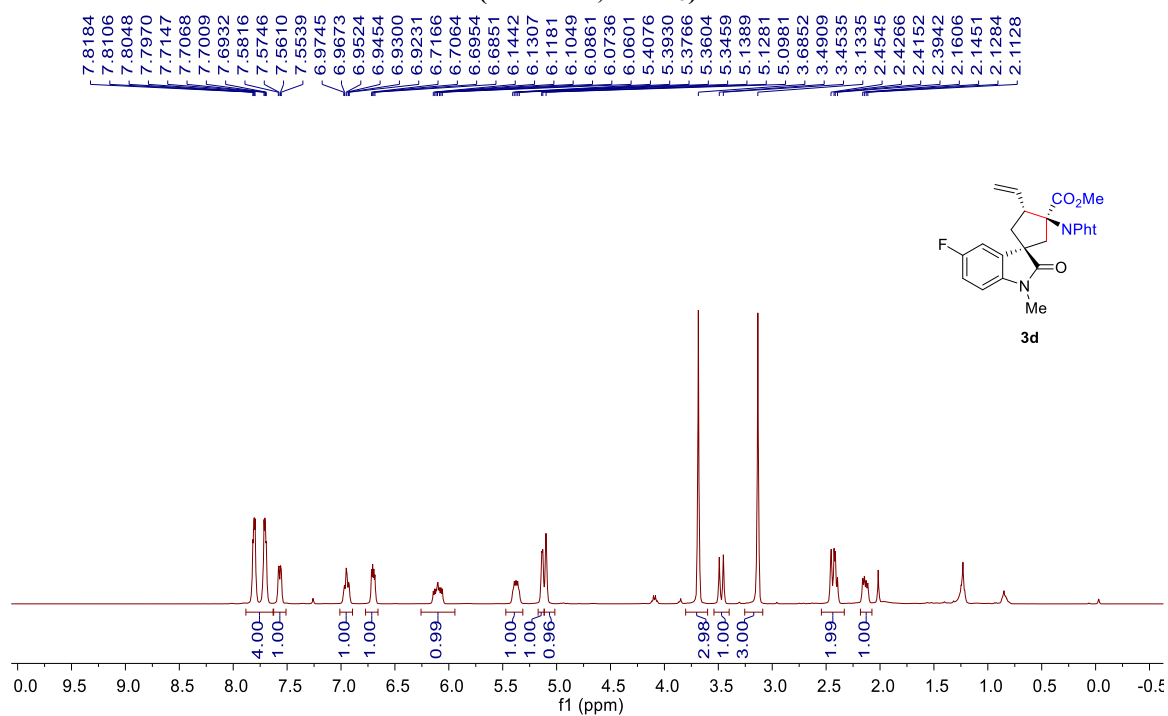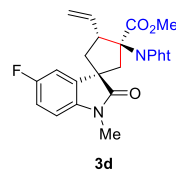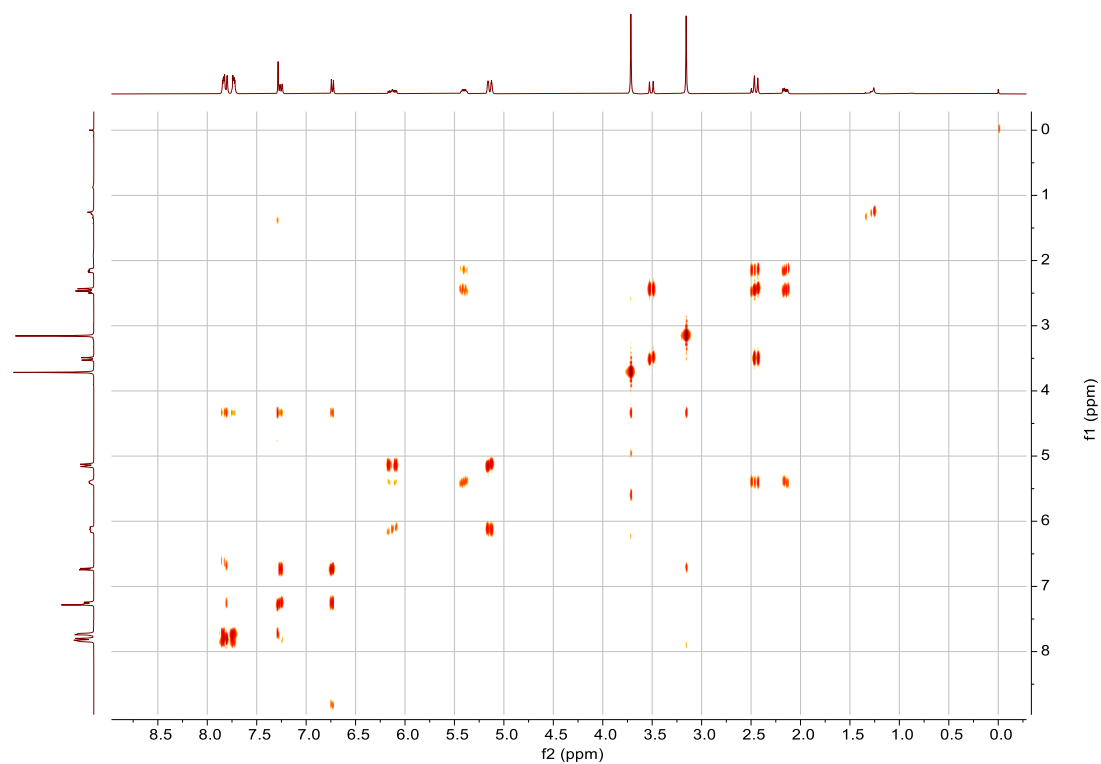

**$^{13}\text{C}$  NMR (101 MHz,  $\text{CDCl}_3$ ) of 3d**

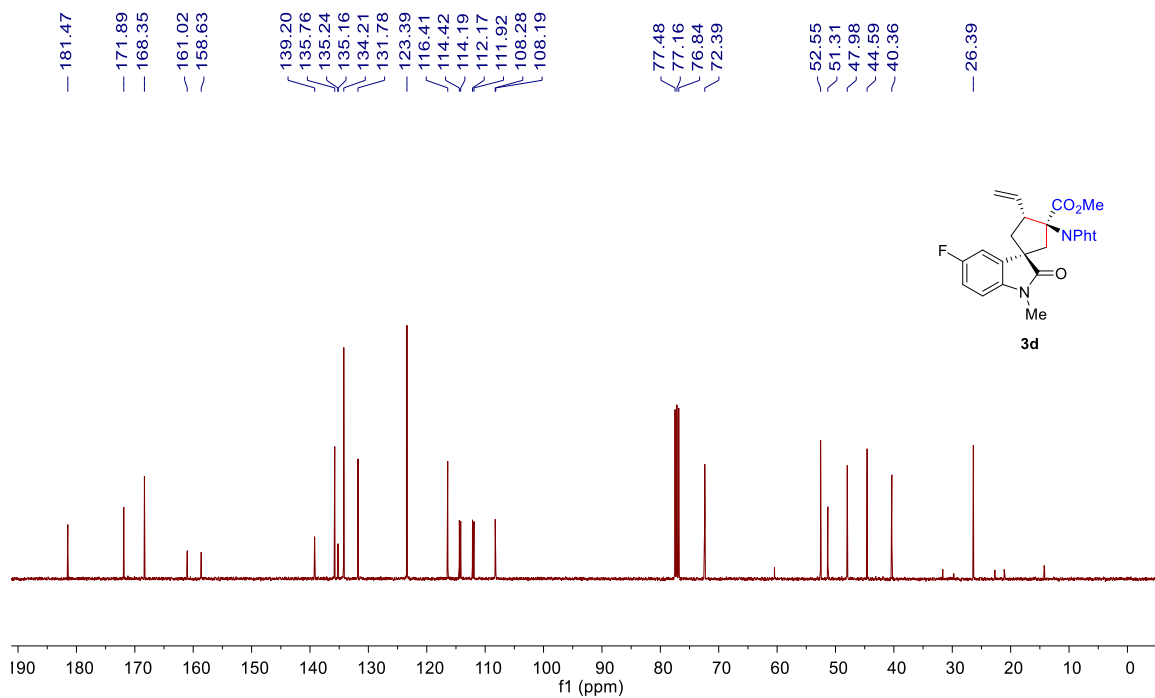

**<sup>1</sup>H NMR (400 MHz, CDCl<sub>3</sub>) of 3d'**

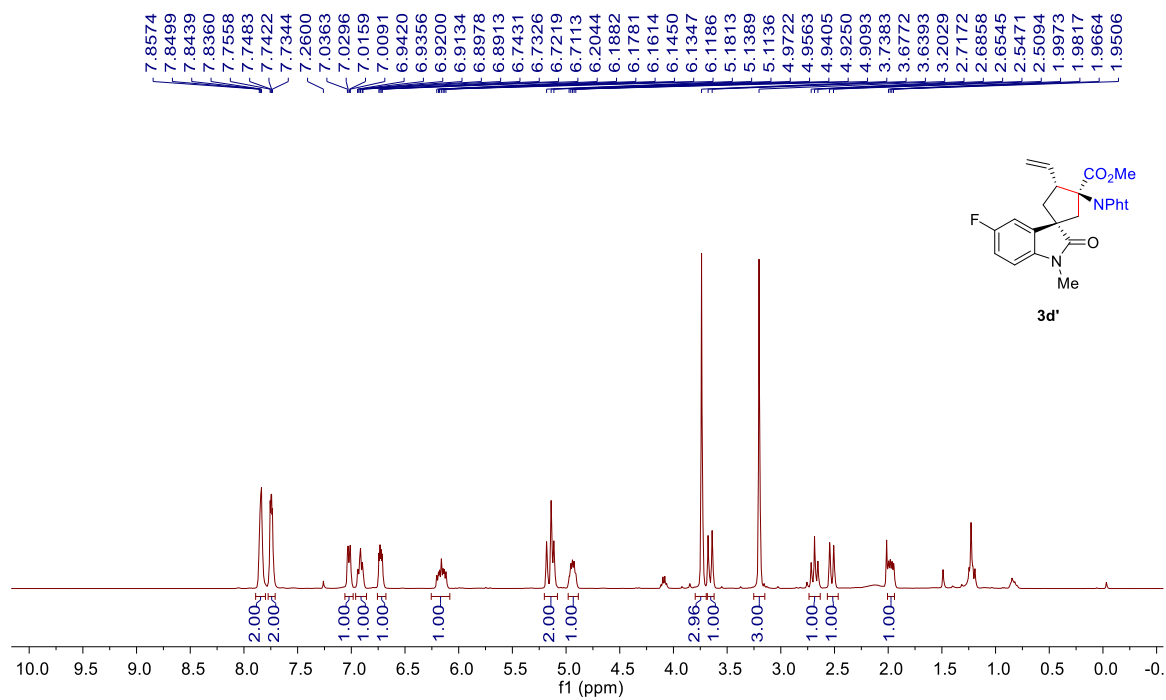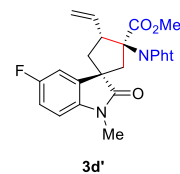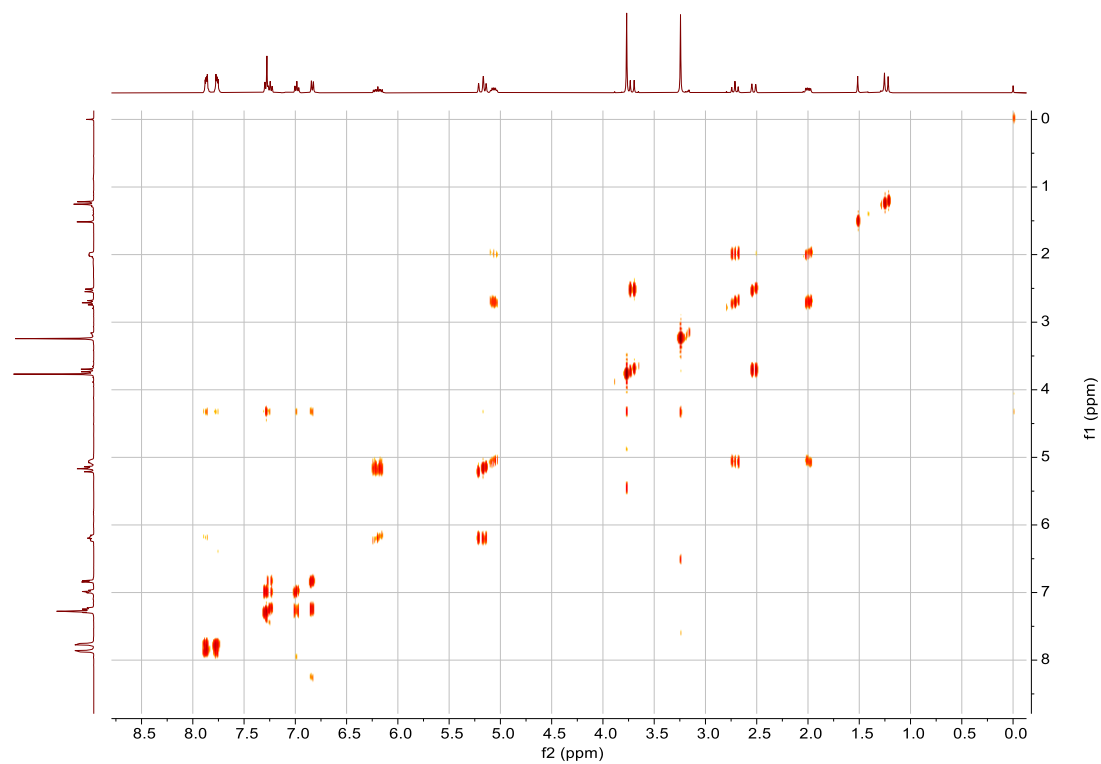

**<sup>13</sup>C NMR (101 MHz, CDCl<sub>3</sub>) of 3d'**

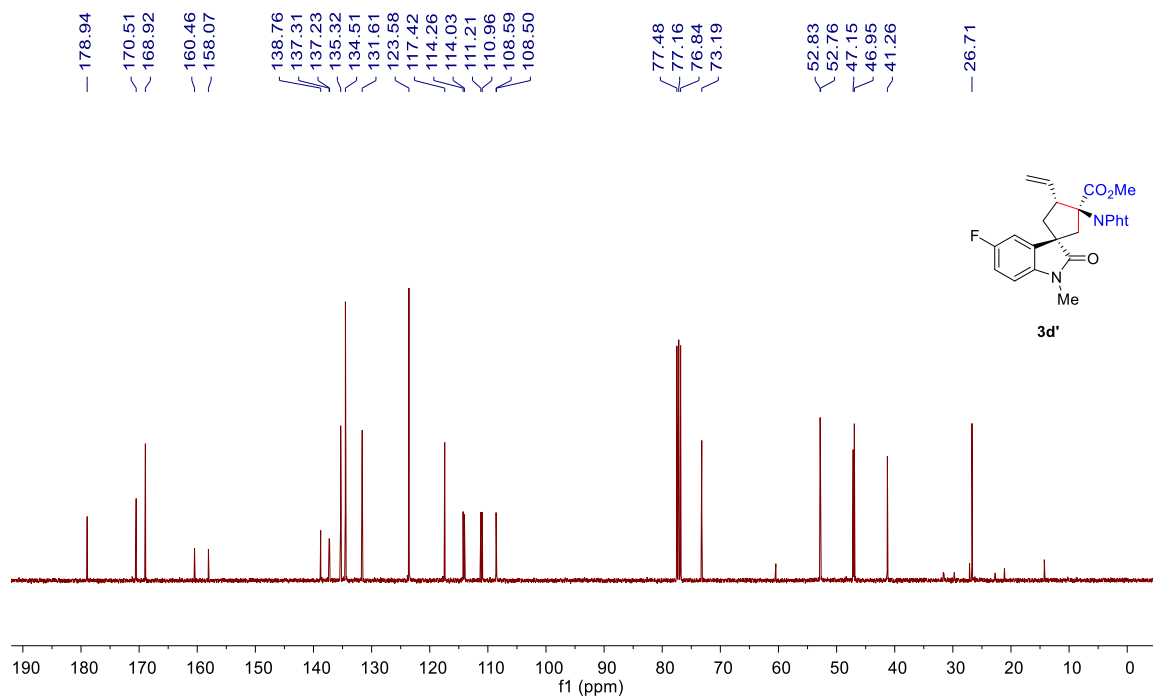

**<sup>1</sup>H NMR (400 MHz, CDCl<sub>3</sub>) of 3d''**

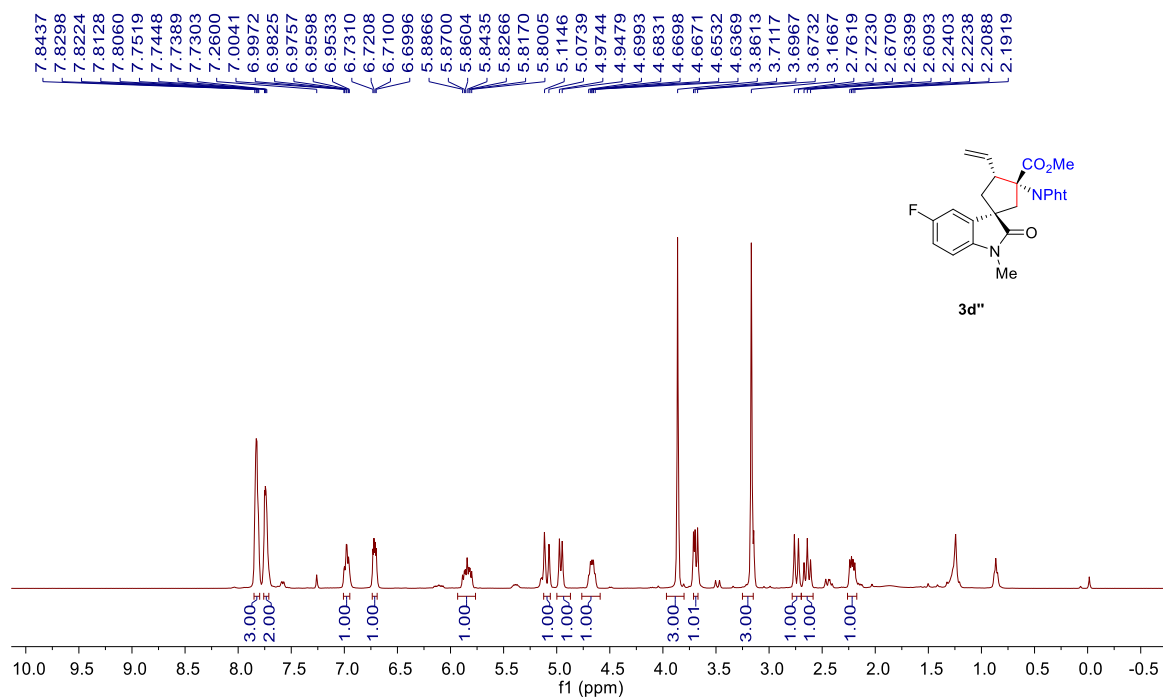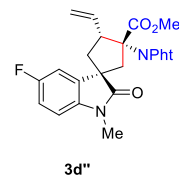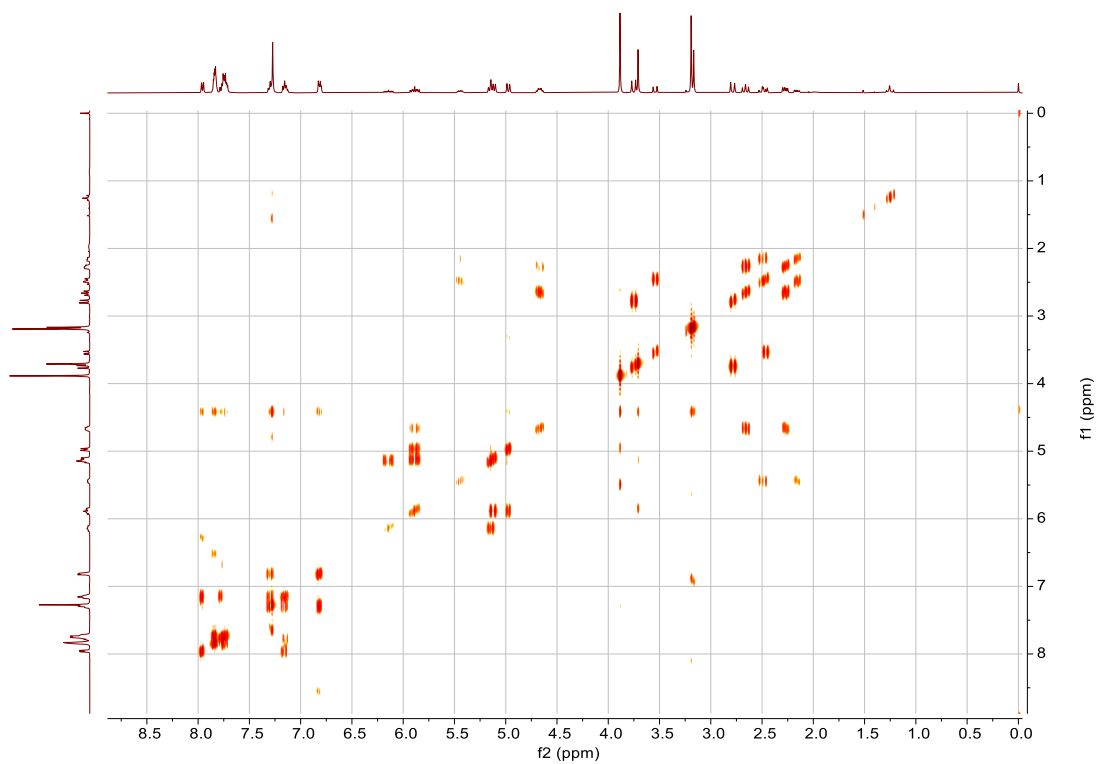

**<sup>13</sup>C NMR (101 MHz, CDCl<sub>3</sub>) of 3d''**

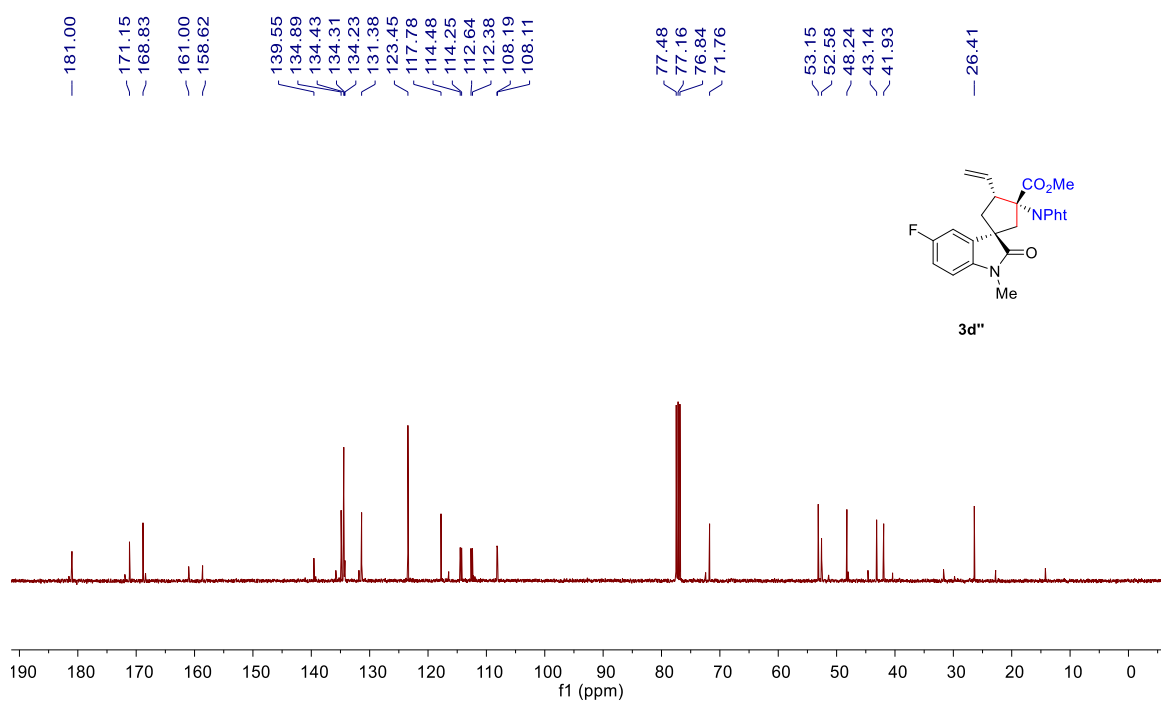

**<sup>1</sup>H NMR (400 MHz, CDCl<sub>3</sub>) of 3e**

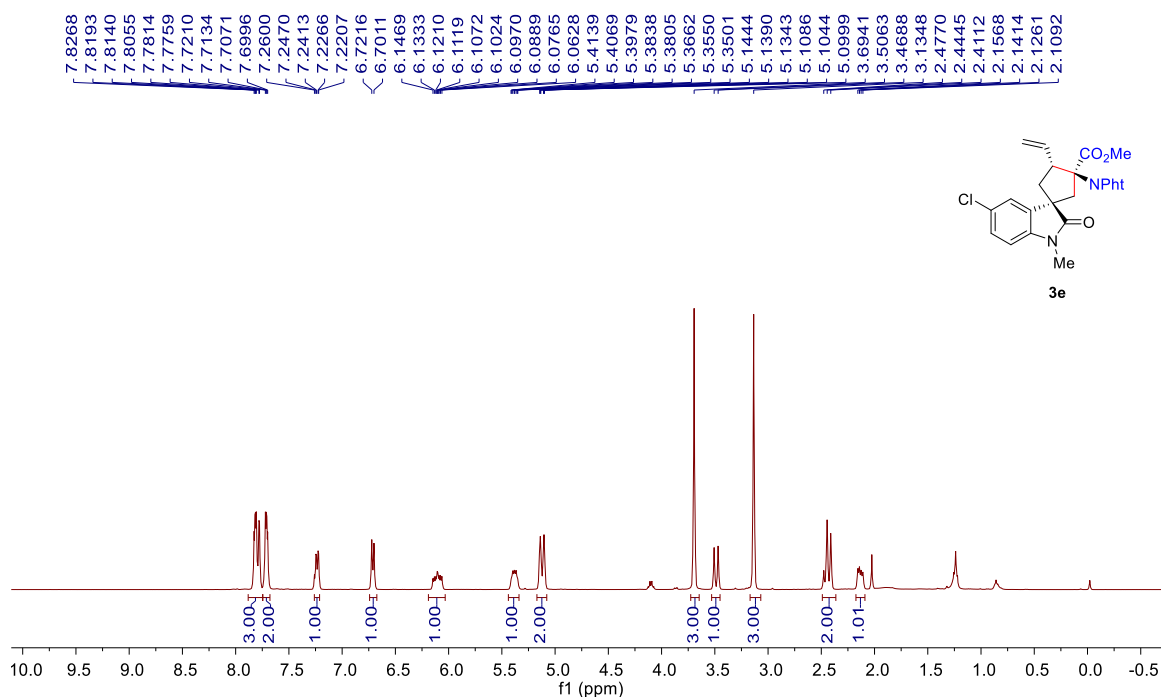

**<sup>13</sup>C NMR (101 MHz, CDCl<sub>3</sub>) of 3e**

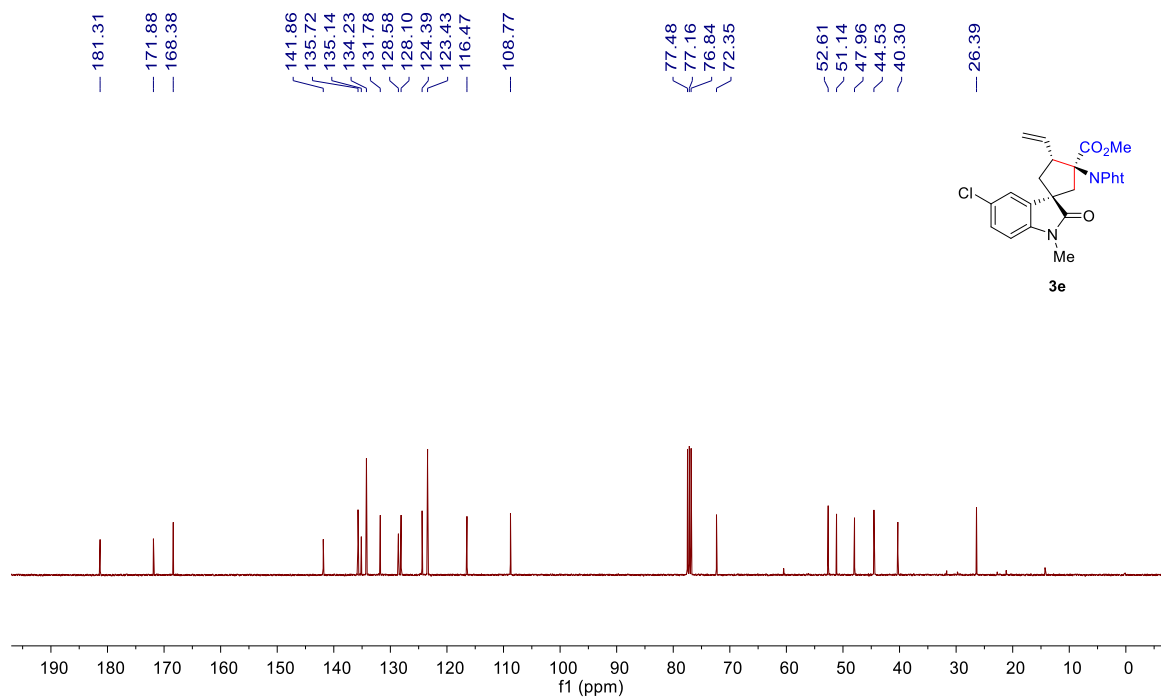

### <sup>1</sup>H NMR (400 MHz, CDCl<sub>3</sub>) of 3e'

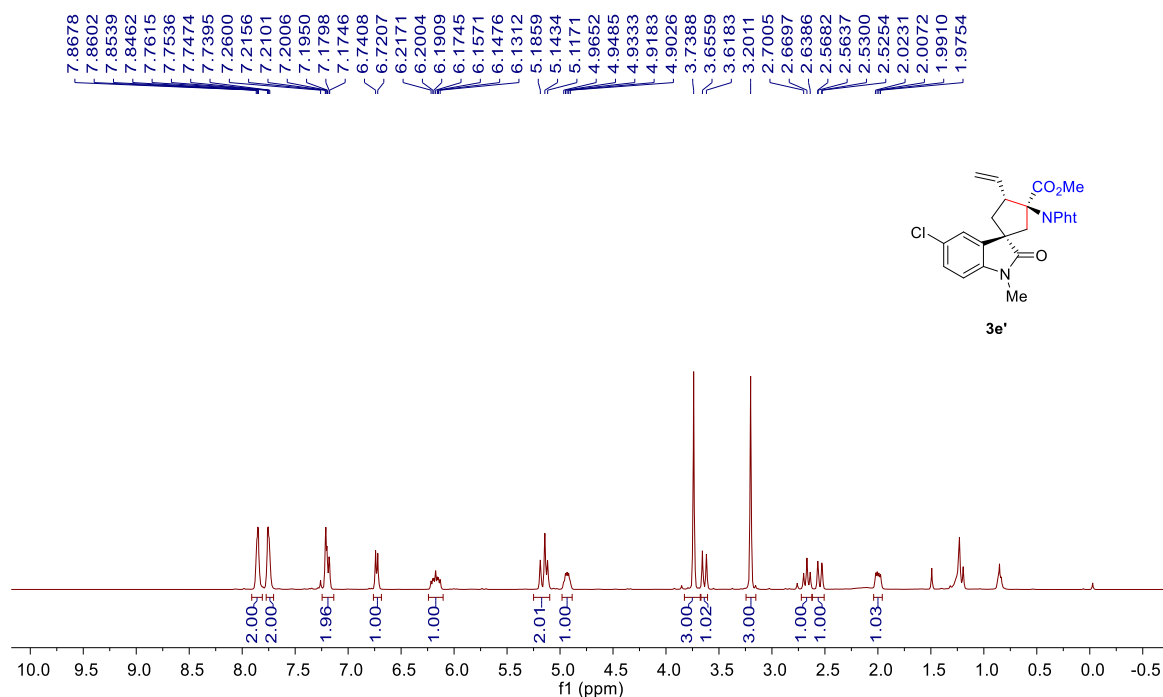

### <sup>13</sup>C NMR (101 MHz, CDCl<sub>3</sub>) of 3e'

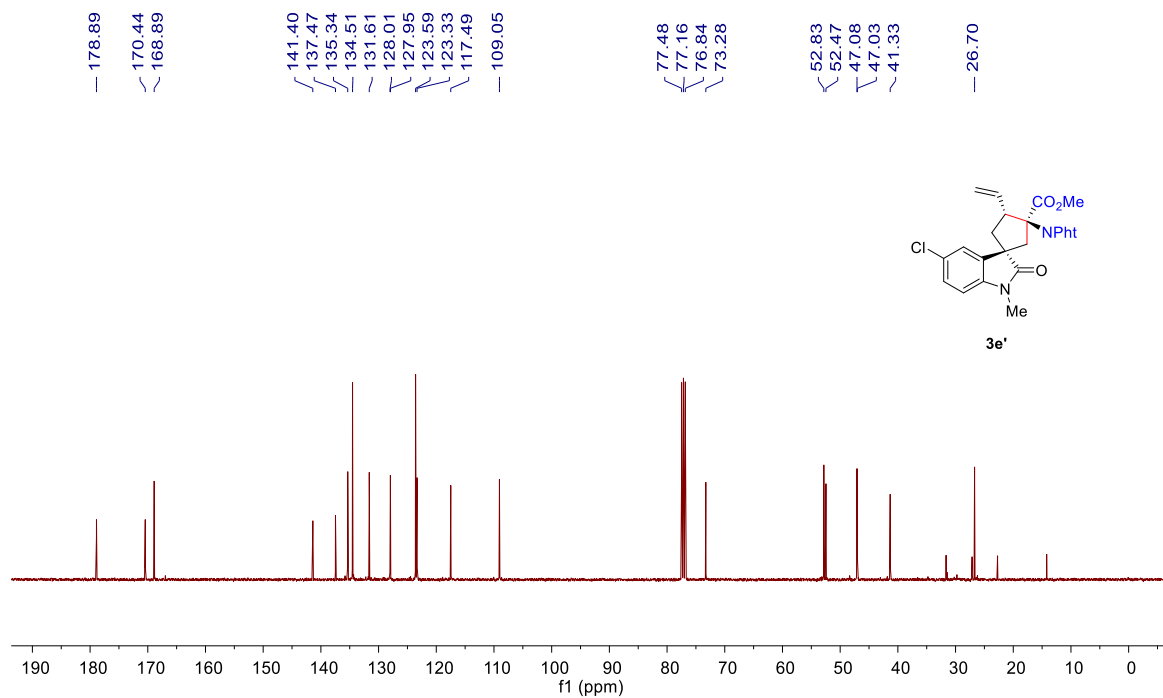

**<sup>1</sup>H NMR (400 MHz, CDCl<sub>3</sub>) of 3e''**

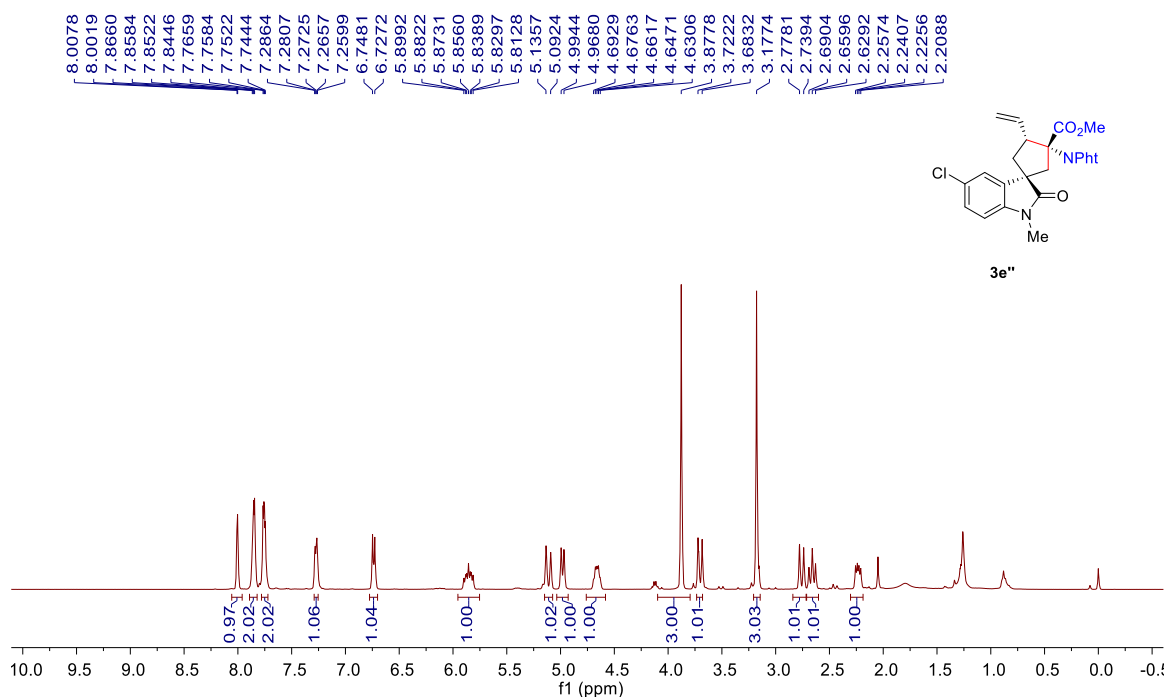

**<sup>13</sup>C NMR (101 MHz, CDCl<sub>3</sub>) of 3e''**

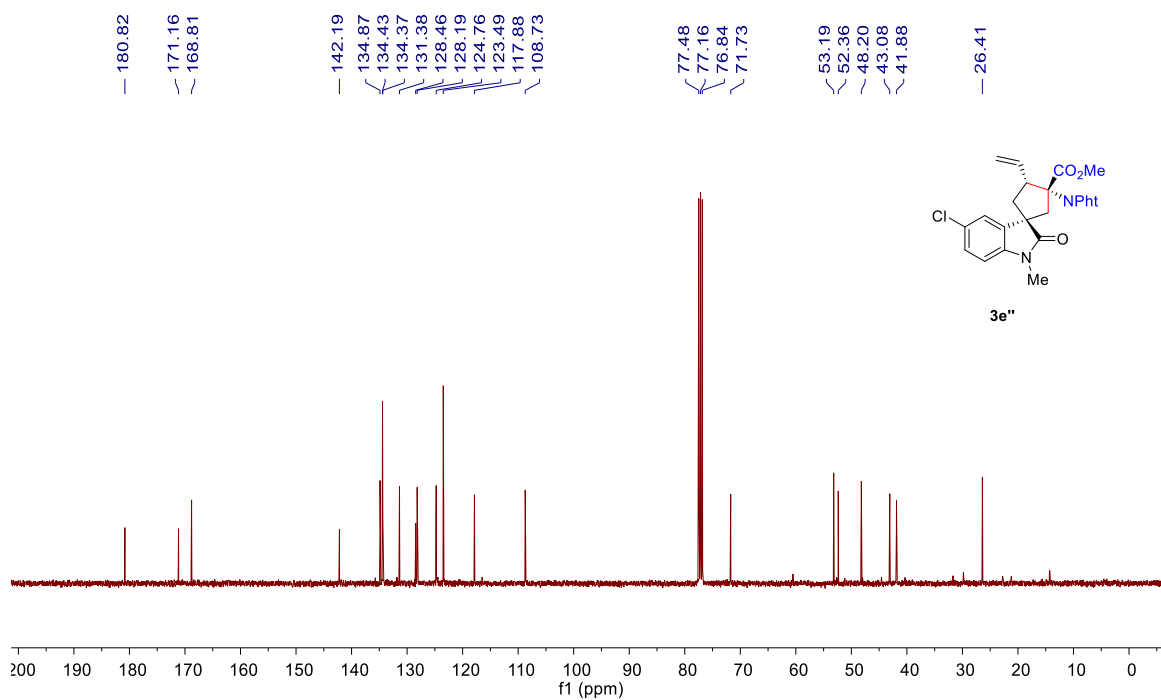

**<sup>1</sup>H NMR (400 MHz, CDCl<sub>3</sub>) of 3f**

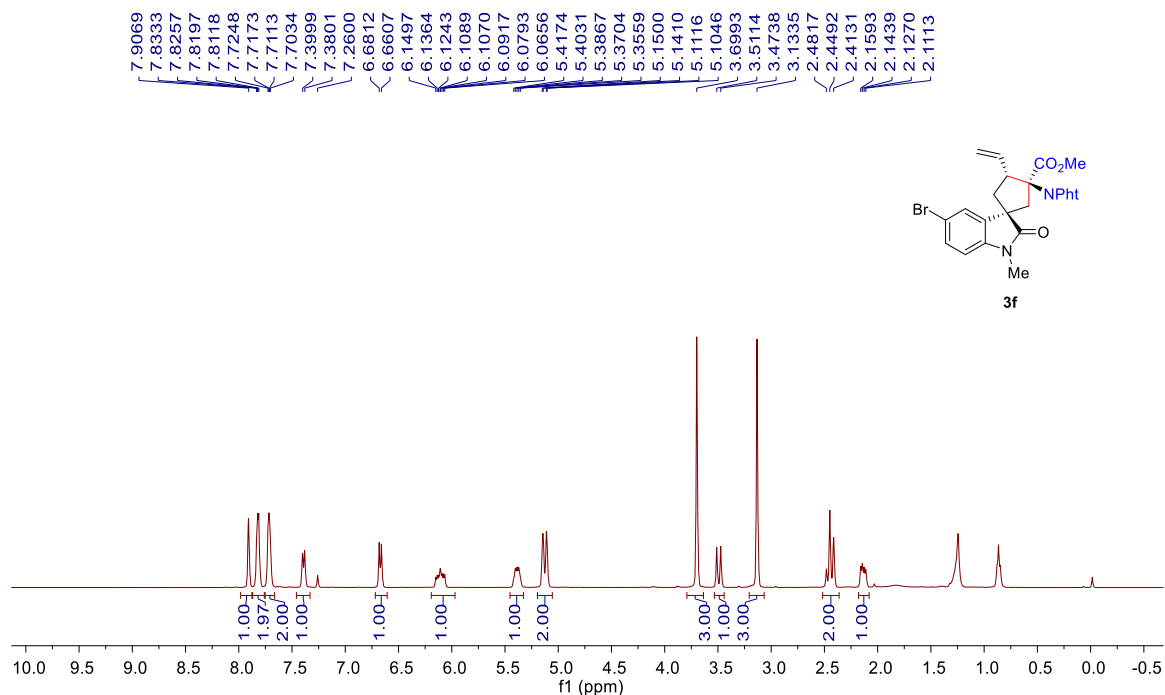

**<sup>13</sup>C NMR (101 MHz, CDCl<sub>3</sub>) of 3f**

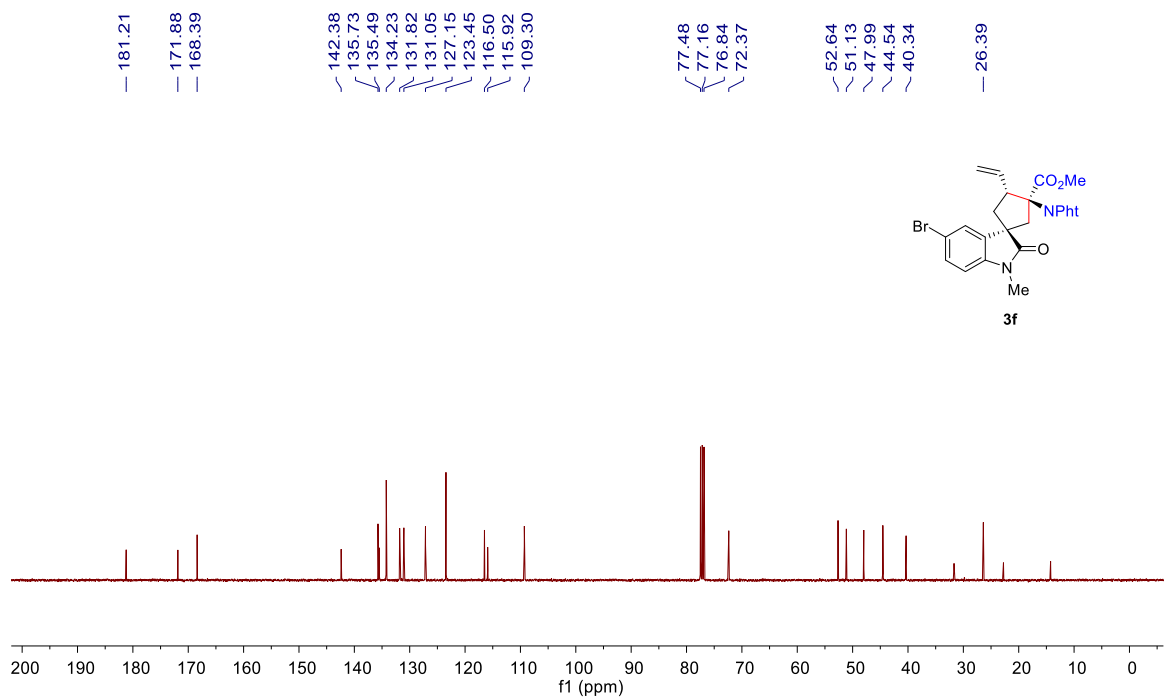

**<sup>1</sup>H NMR (400 MHz, CDCl<sub>3</sub>) of 3f'**

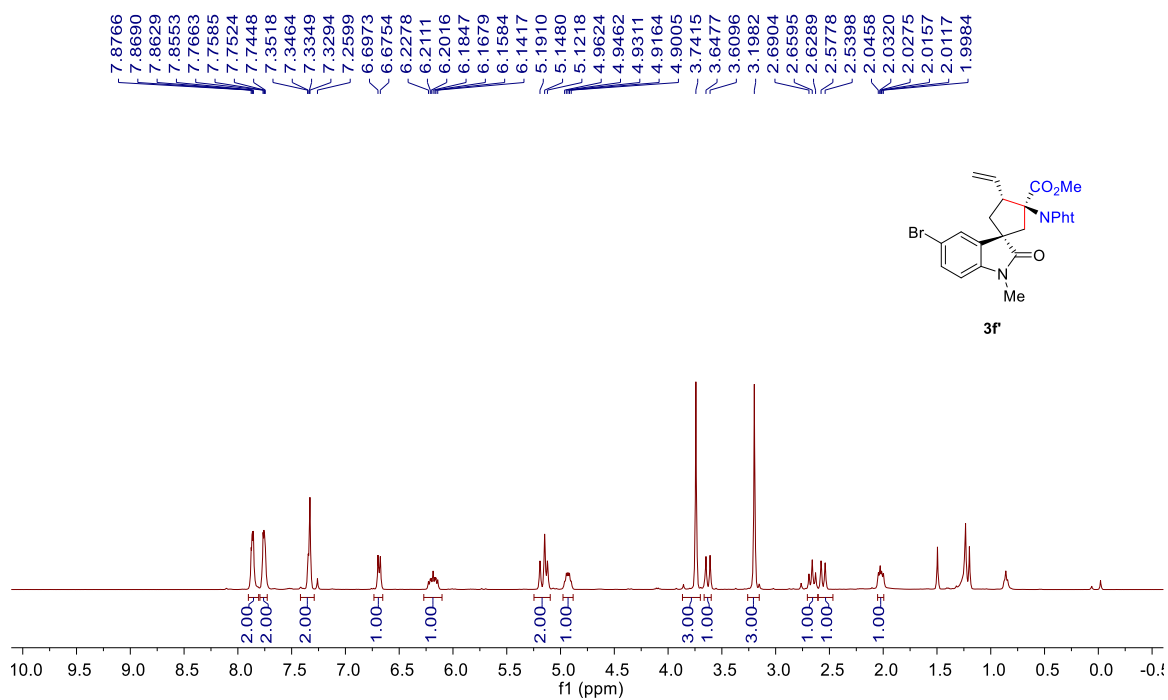

**<sup>13</sup>C NMR (101 MHz, CDCl<sub>3</sub>) of 3f'**

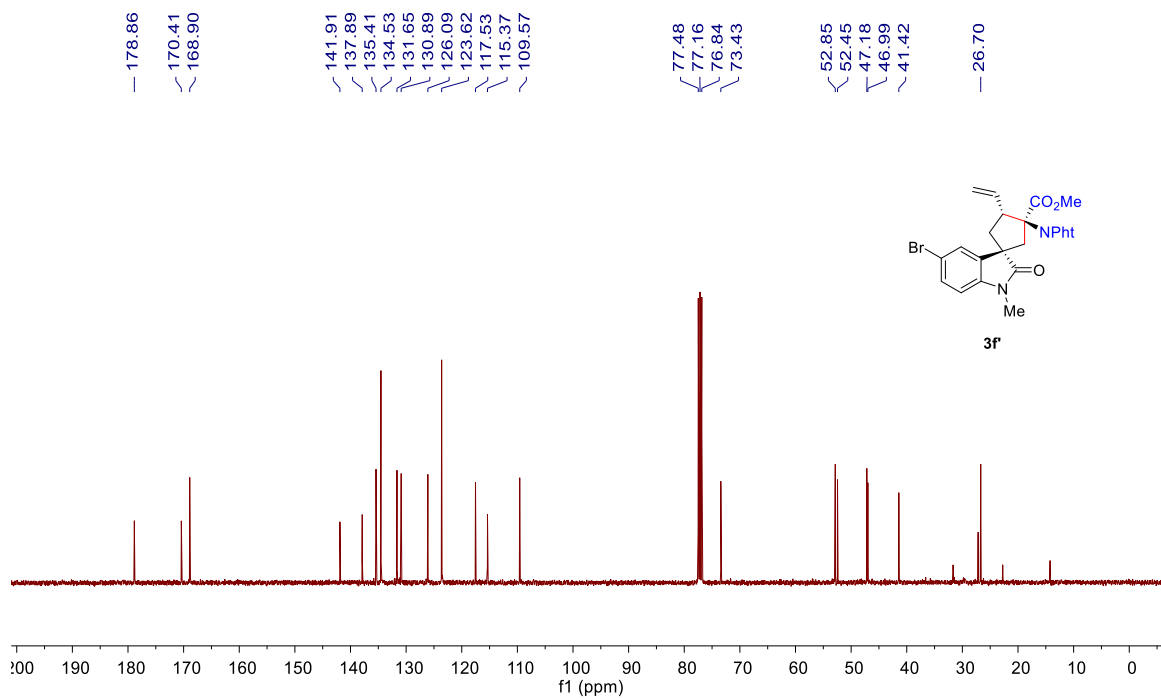

**<sup>1</sup>H NMR (400 MHz, CDCl<sub>3</sub>) of 3f''**

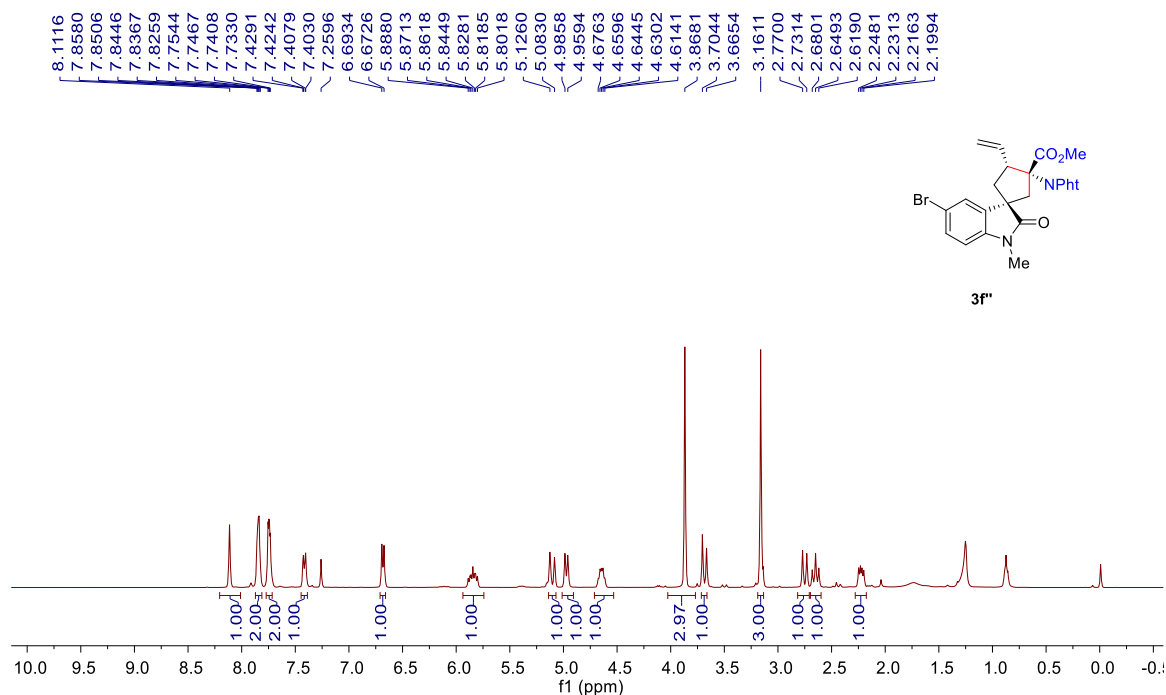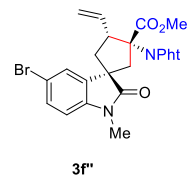

**<sup>13</sup>C NMR (101 MHz, CDCl<sub>3</sub>) of 3f''**

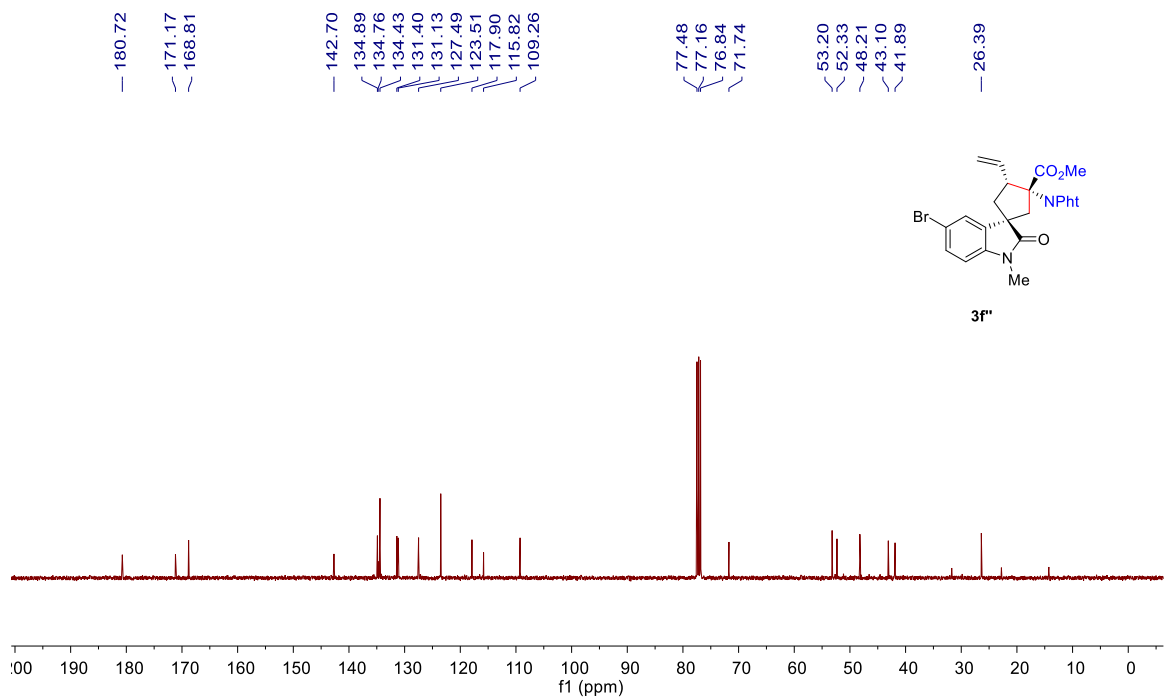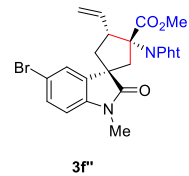

**<sup>1</sup>H NMR (400 MHz, CDCl<sub>3</sub>) of 3g**

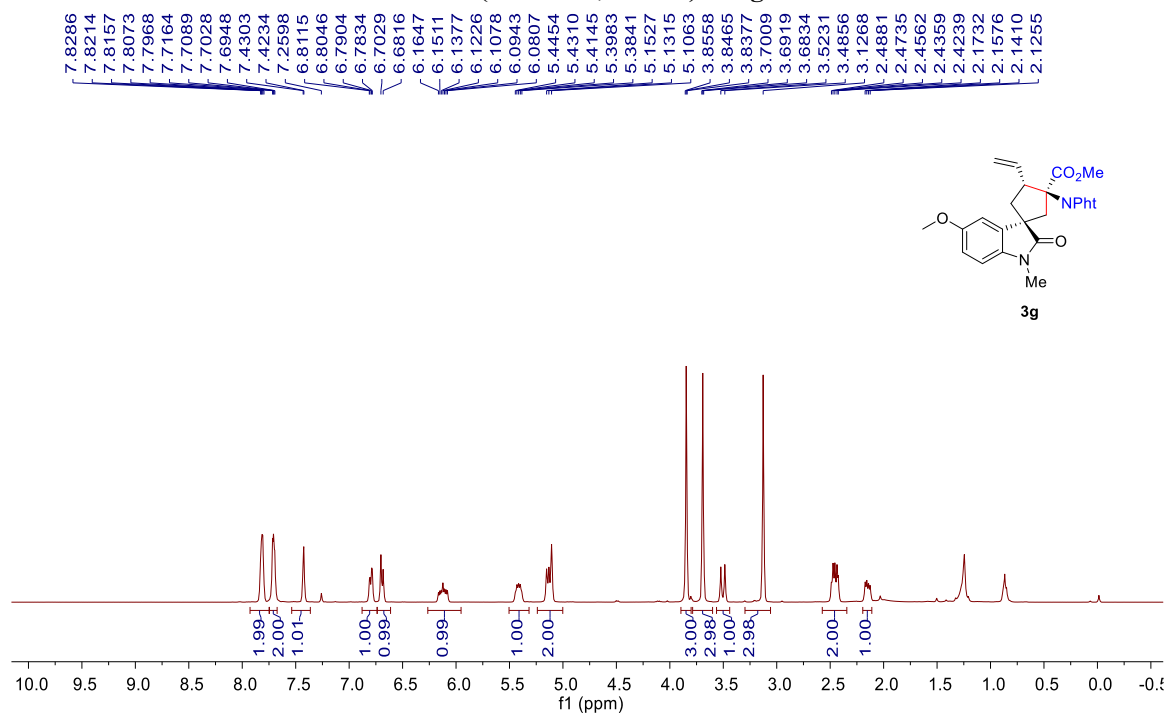

**<sup>13</sup>C NMR (101 MHz, CDCl<sub>3</sub>) of 3g**

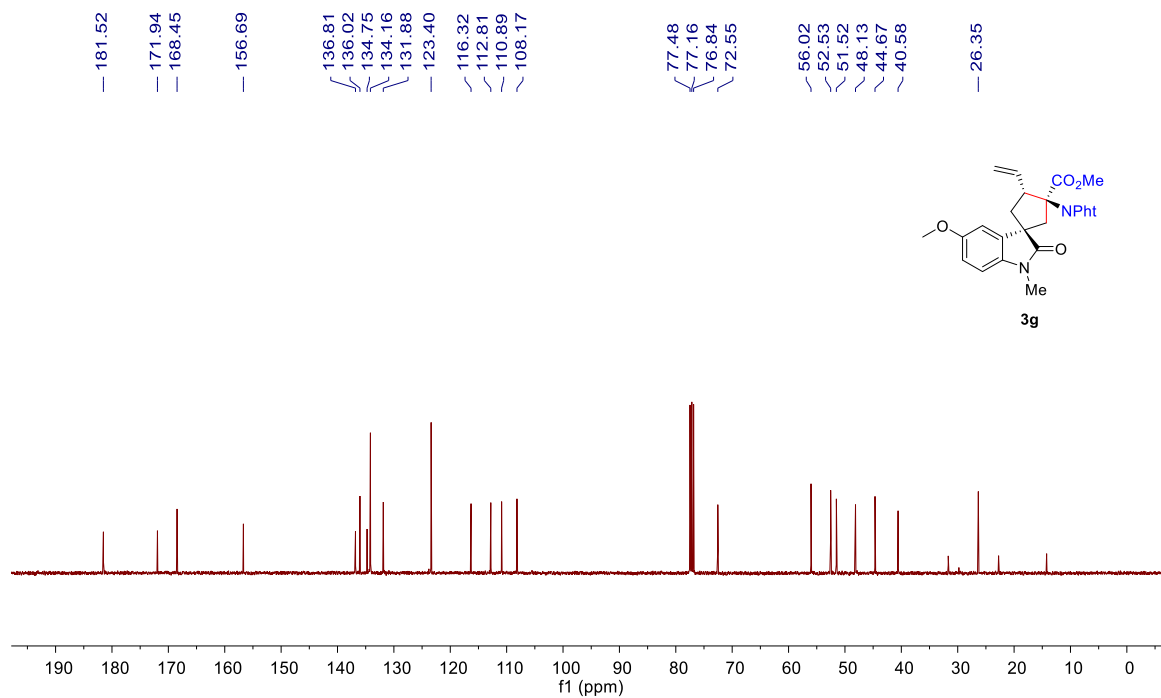

**<sup>1</sup>H NMR (400 MHz, CDCl<sub>3</sub>) of 3g'**

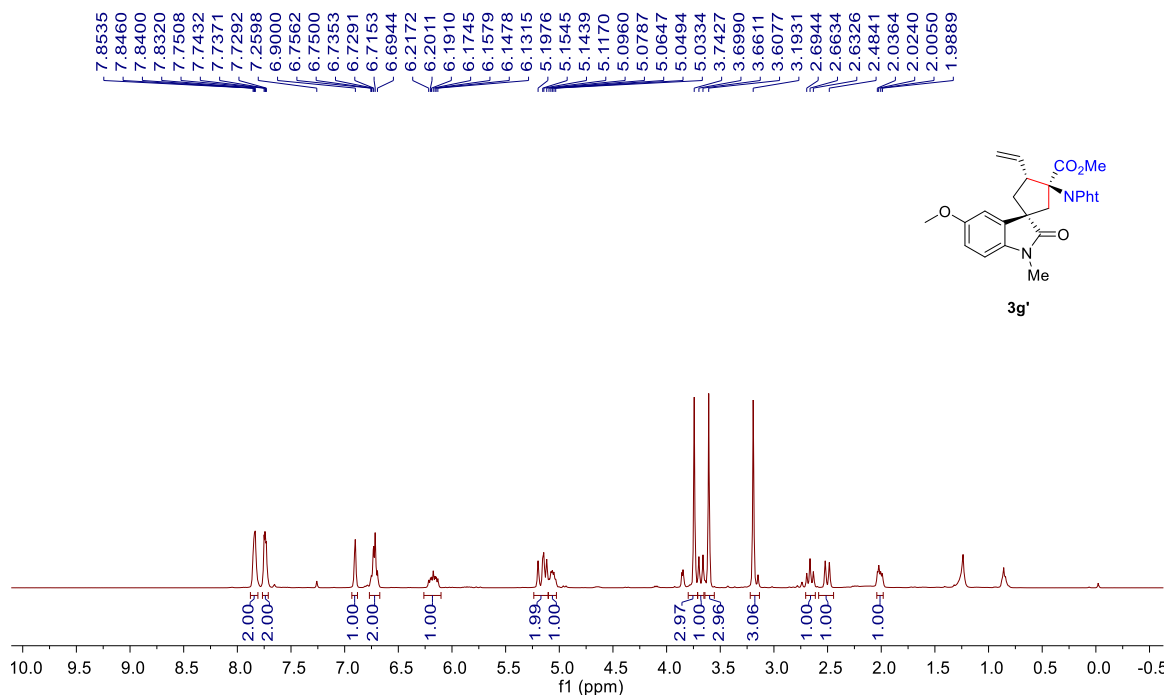

**<sup>13</sup>C NMR (101 MHz, CDCl<sub>3</sub>) of 3g'**

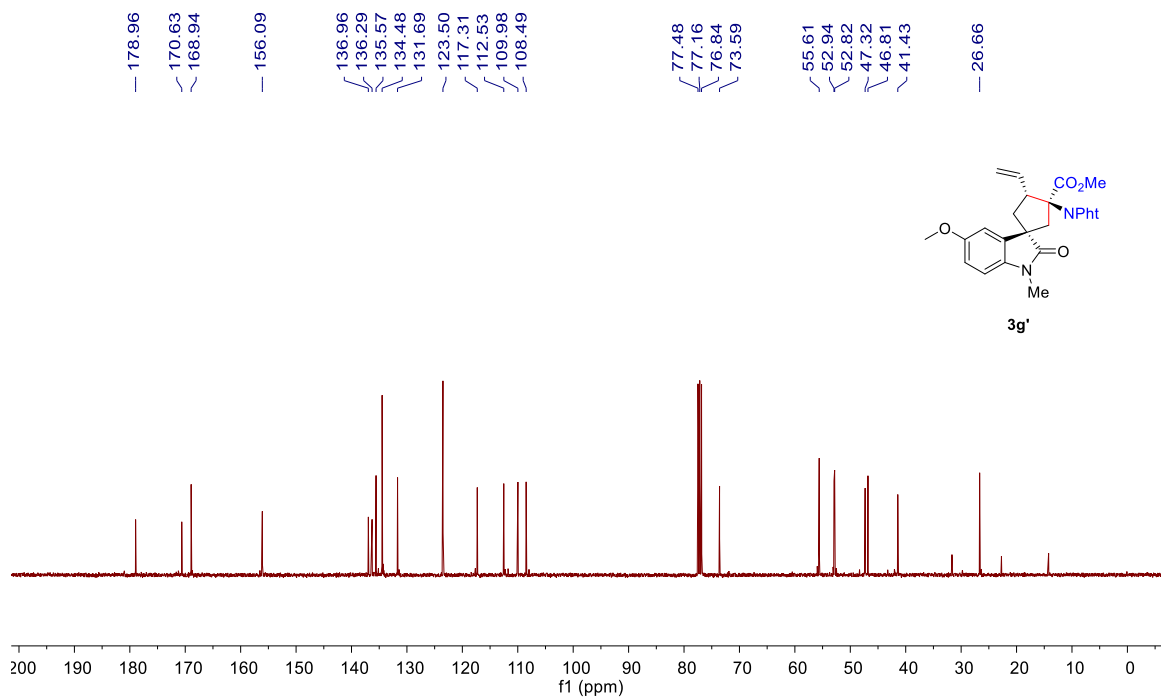

### <sup>1</sup>H NMR (400 MHz, CDCl<sub>3</sub>) of 3g''

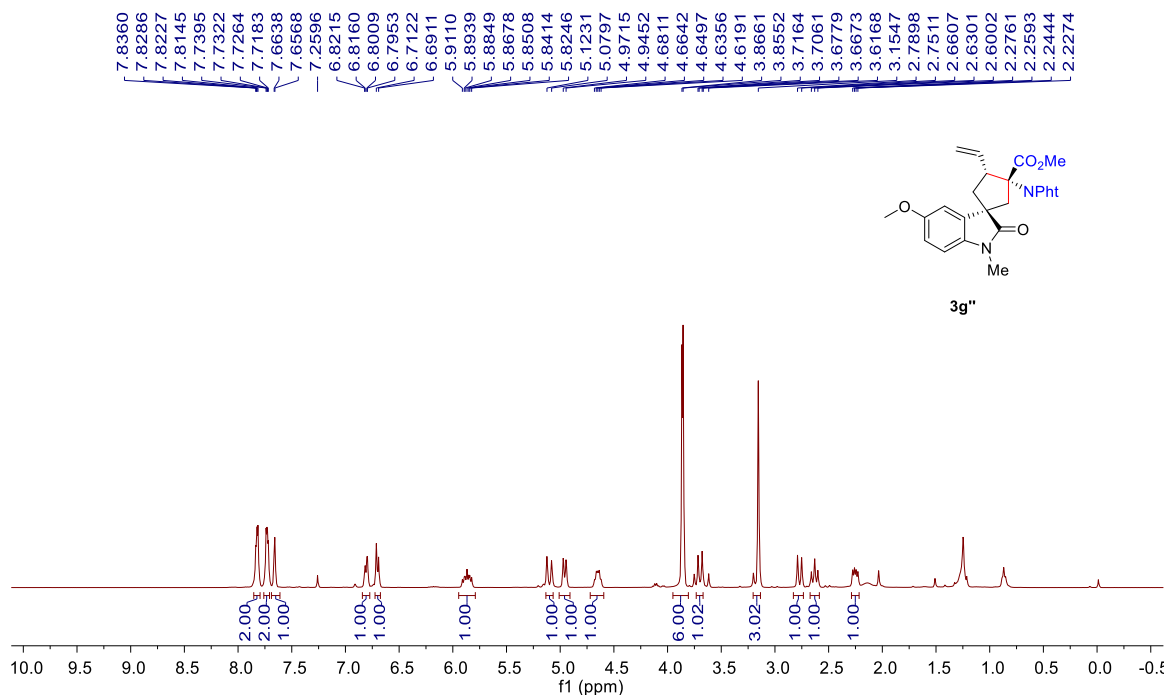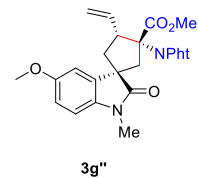

### <sup>13</sup>C NMR (101 MHz, CDCl<sub>3</sub>) of 3g''

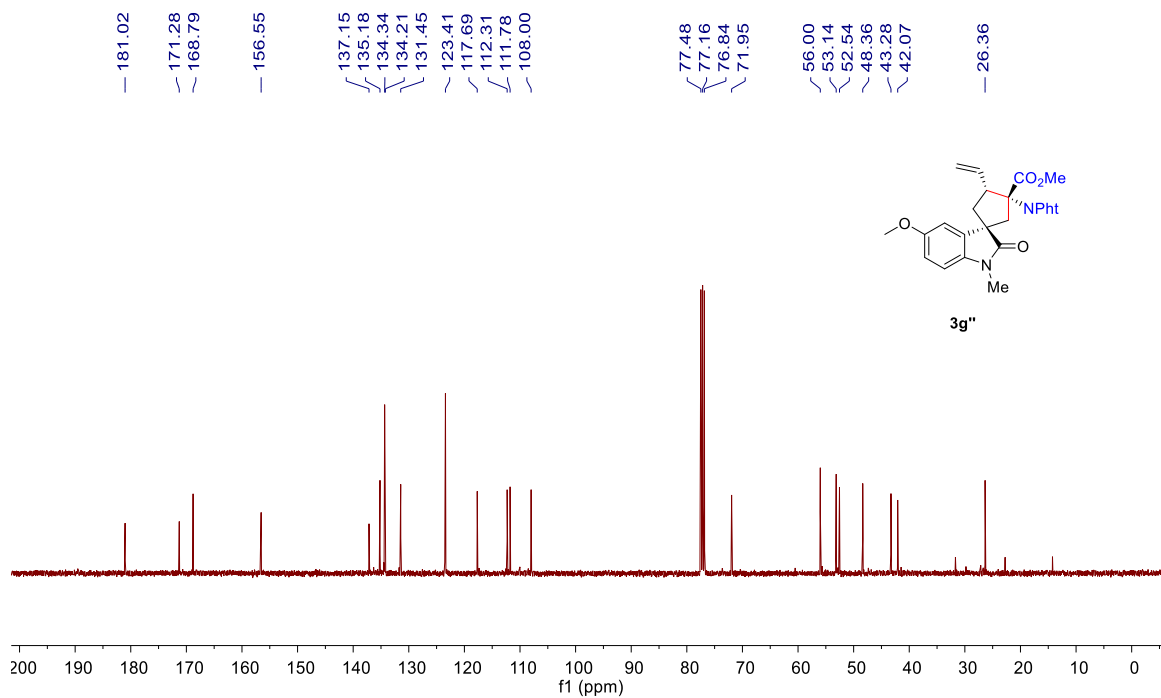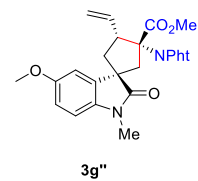

### <sup>1</sup>H NMR (400 MHz, CDCl<sub>3</sub>) of 3h

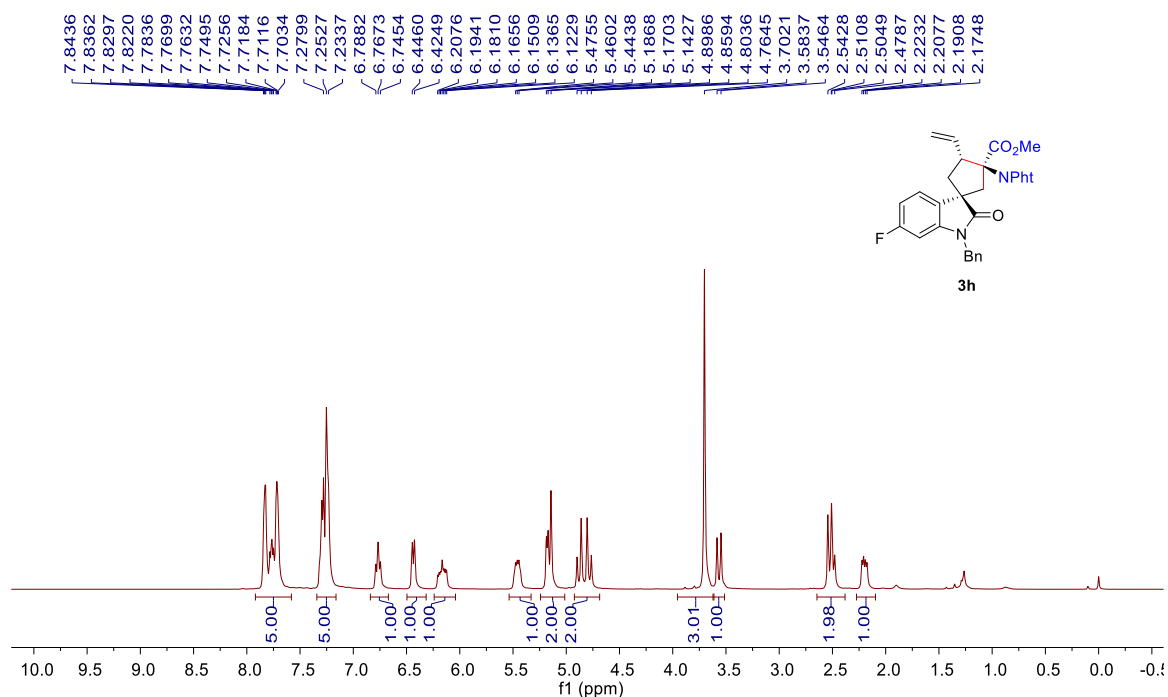

### <sup>13</sup>C NMR (101 MHz, CDCl<sub>3</sub>) of 3h

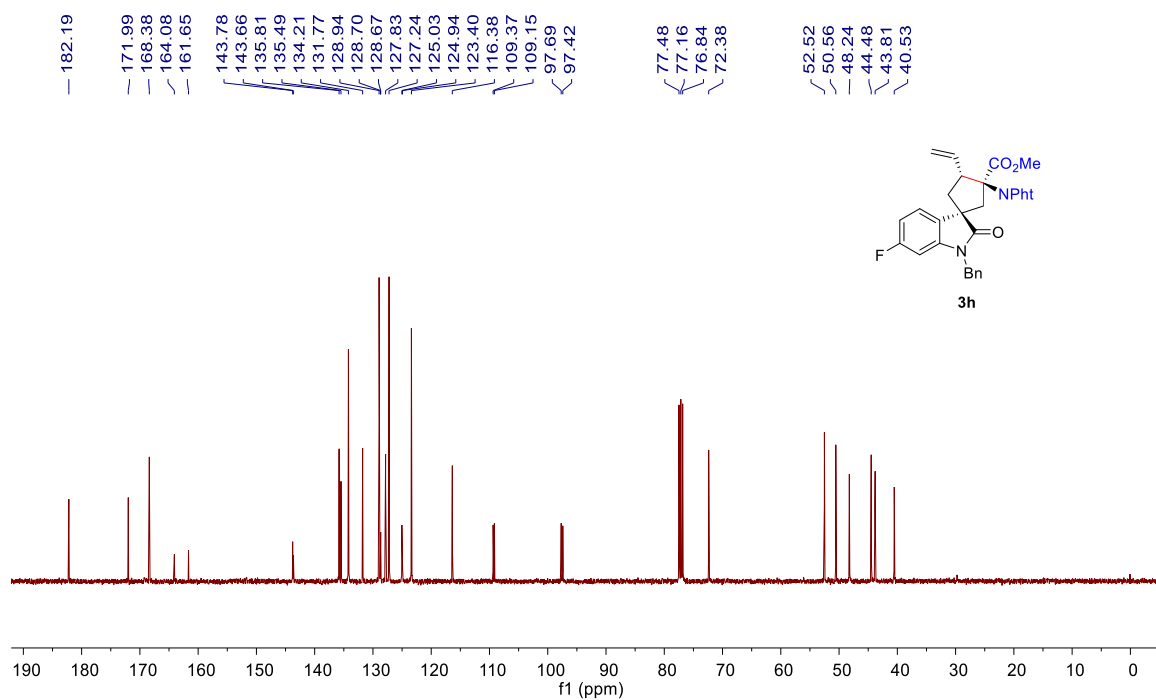

**<sup>1</sup>H NMR (400 MHz, CDCl<sub>3</sub>) of 3h'**

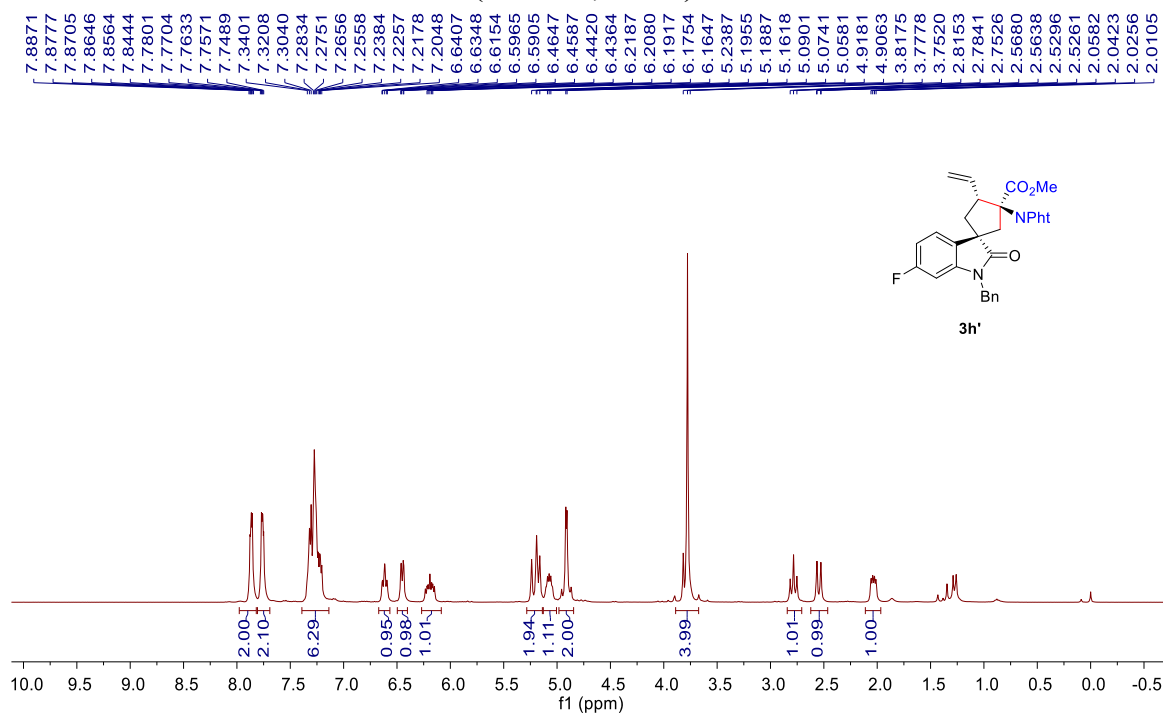

**<sup>13</sup>C NMR (101 MHz, CDCl<sub>3</sub>) of 3h'**

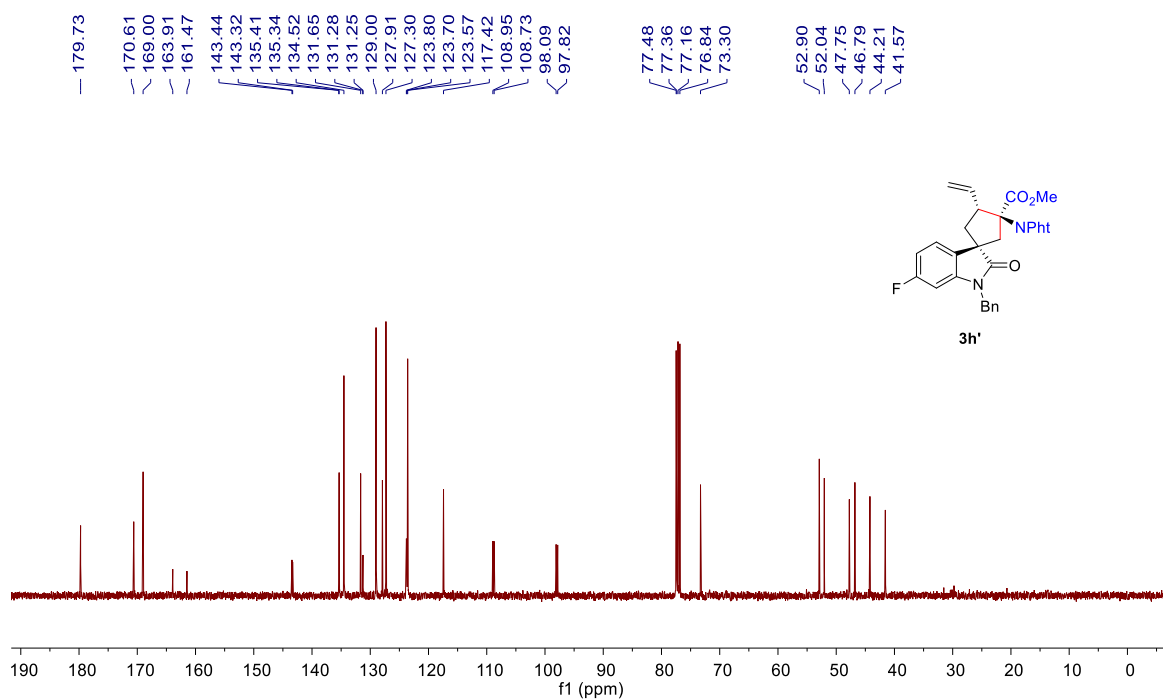

**<sup>1</sup>H NMR (400 MHz, CDCl<sub>3</sub>) of 3h''**

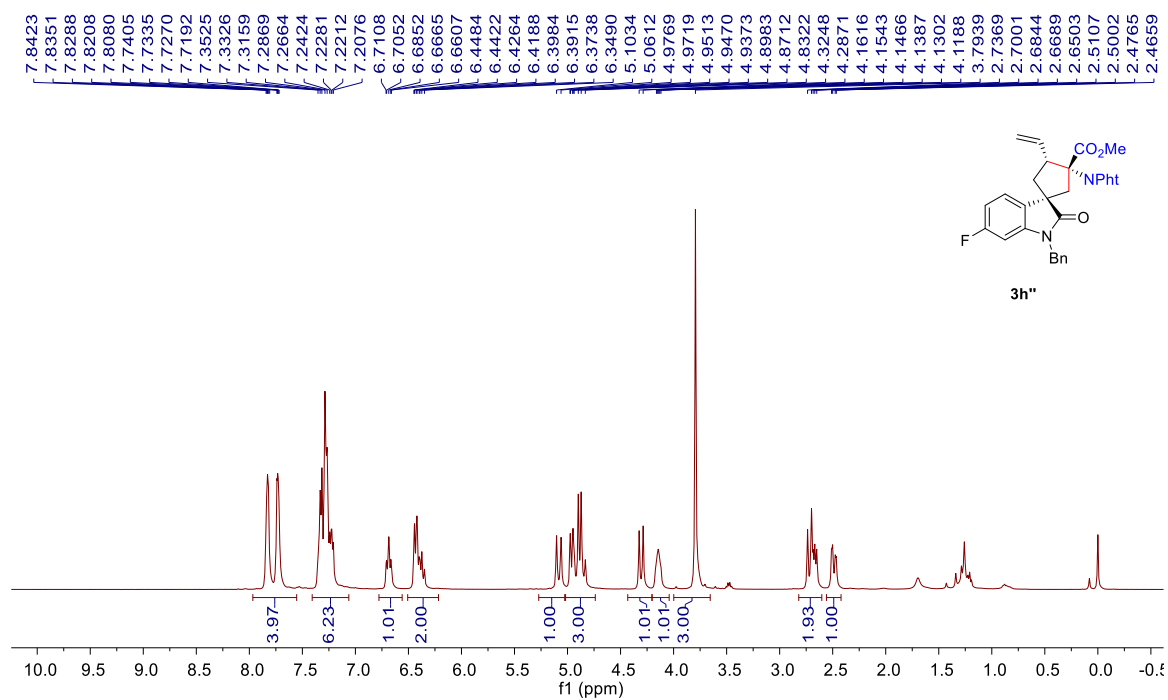

**<sup>13</sup>C NMR (101 MHz, CDCl<sub>3</sub>) of 3h''**

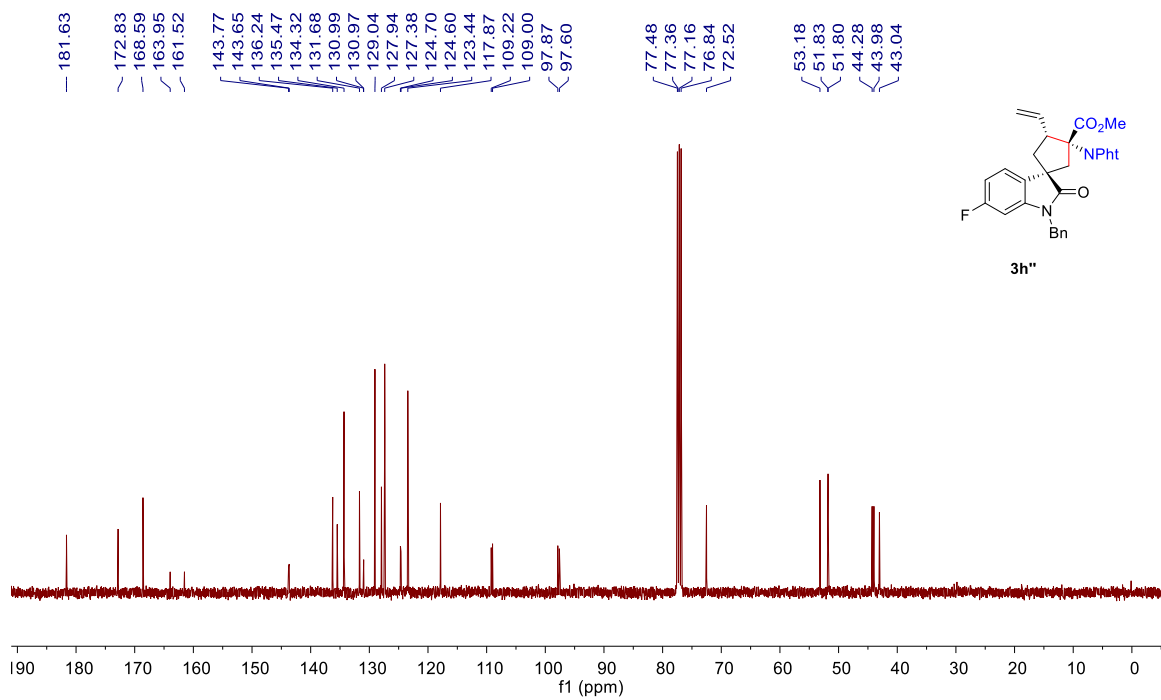

### <sup>1</sup>H NMR (400 MHz, CDCl<sub>3</sub>) of 3i

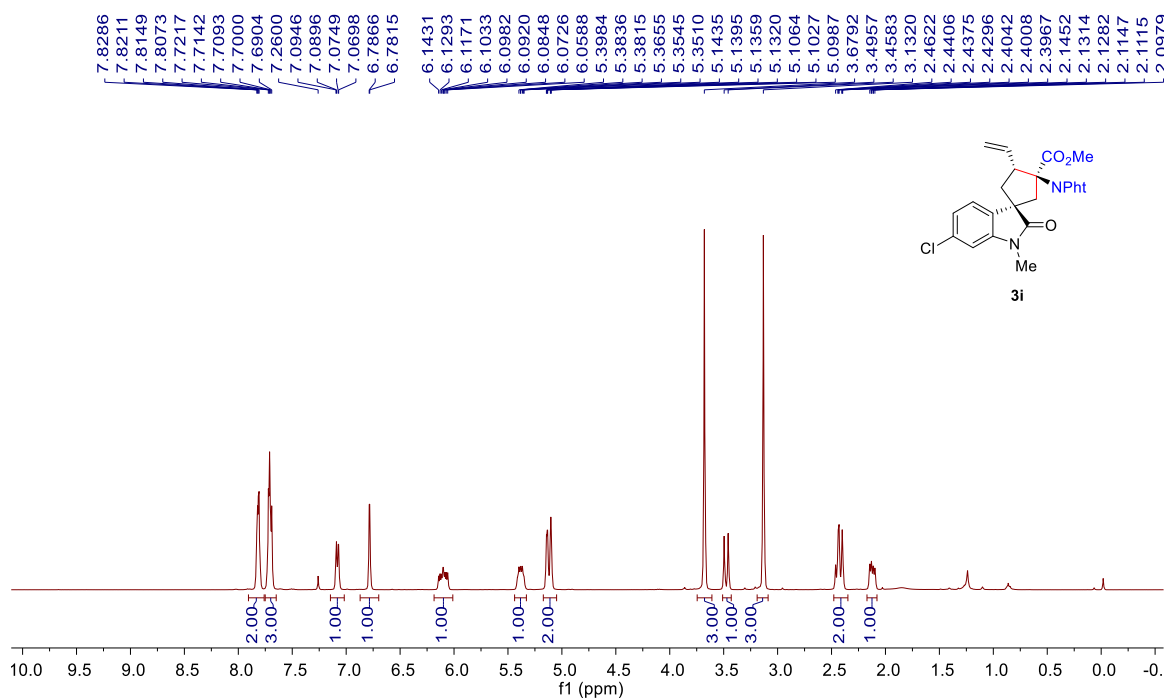

### <sup>13</sup>C NMR (101 MHz, CDCl<sub>3</sub>) of 3i

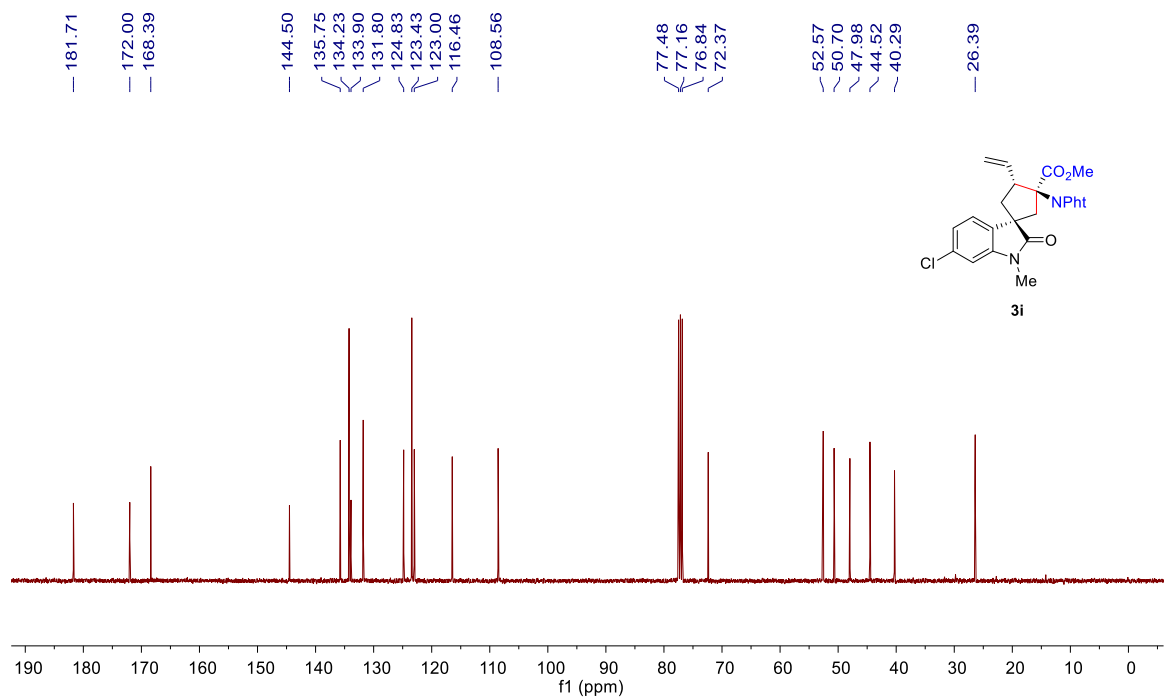

### <sup>1</sup>H NMR (400 MHz, CDCl<sub>3</sub>) of 3i'

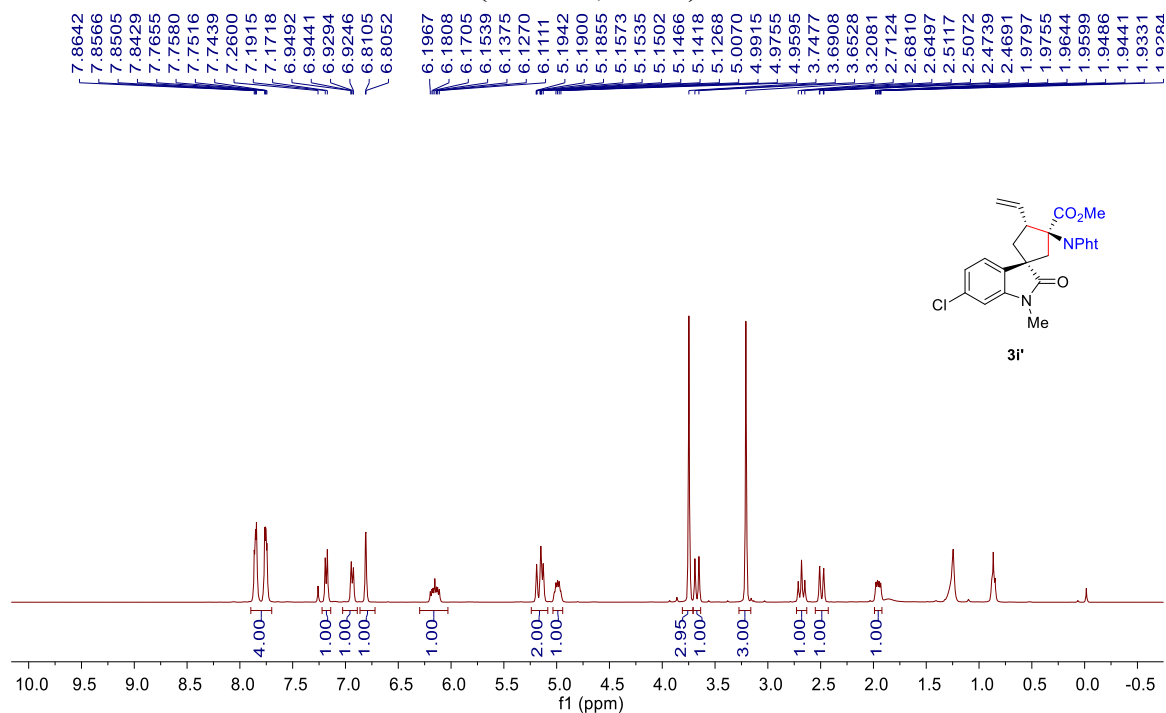

### <sup>13</sup>C NMR (101 MHz, CDCl<sub>3</sub>) of 3i'

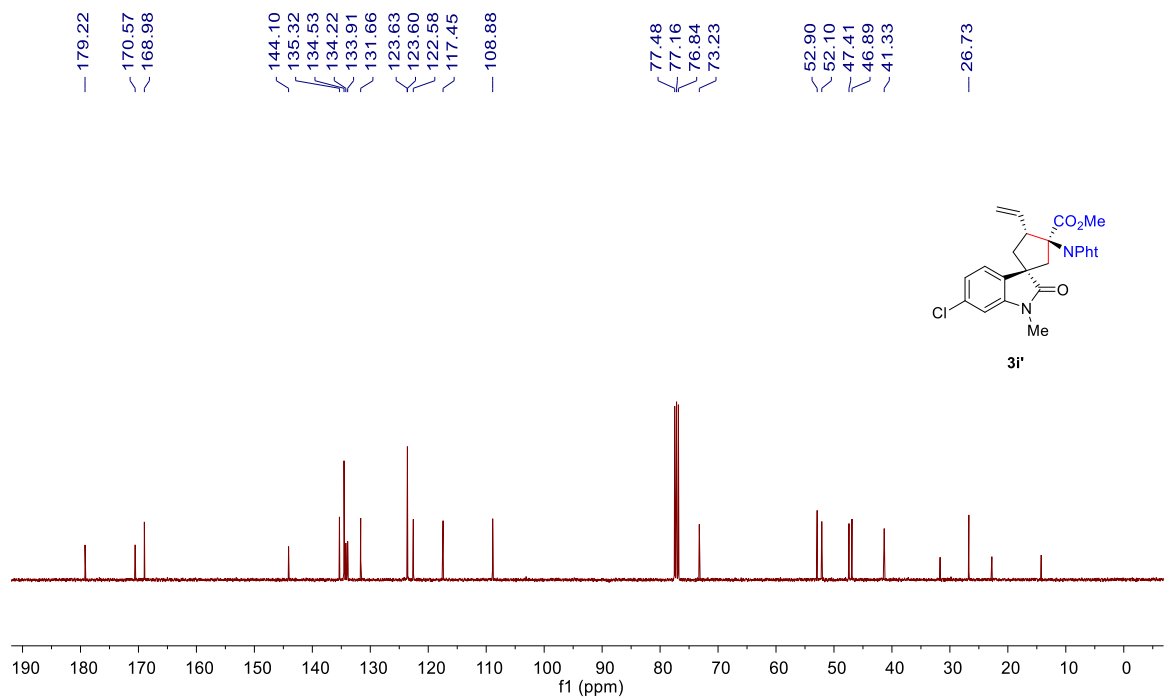

**<sup>1</sup>H NMR (400 MHz, CDCl<sub>3</sub>) of 3i''**

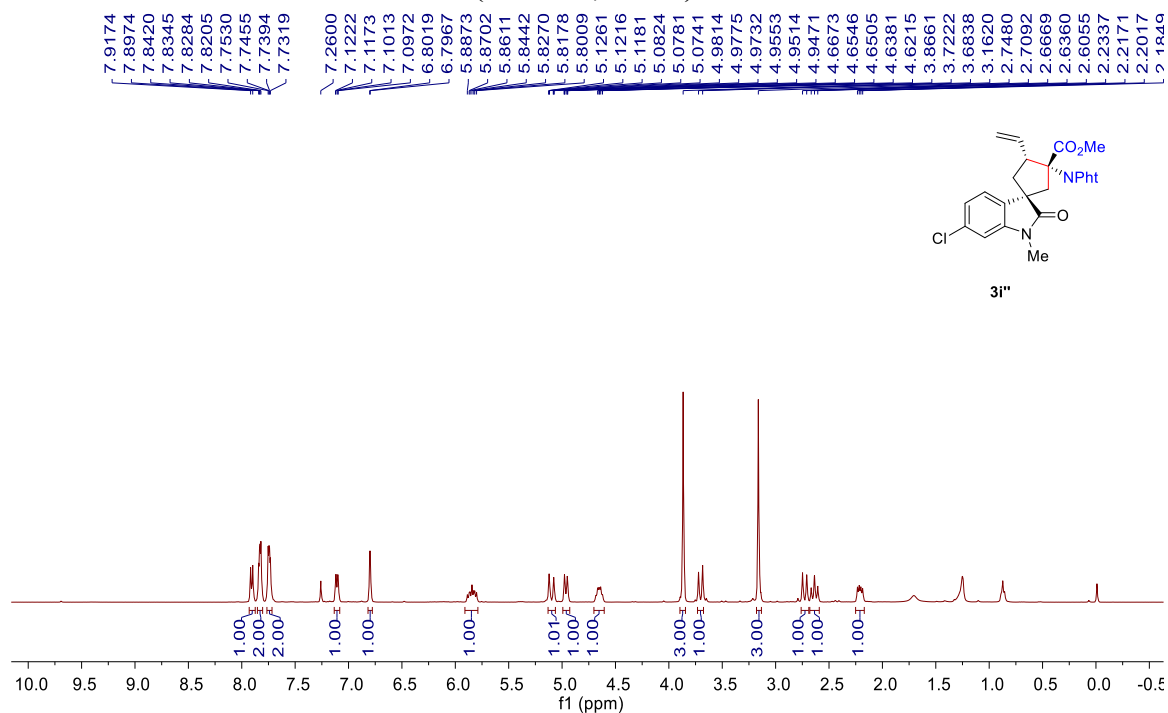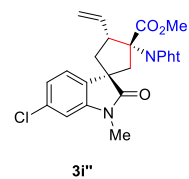

**<sup>13</sup>C NMR (101 MHz, CDCl<sub>3</sub>) of 3i''**

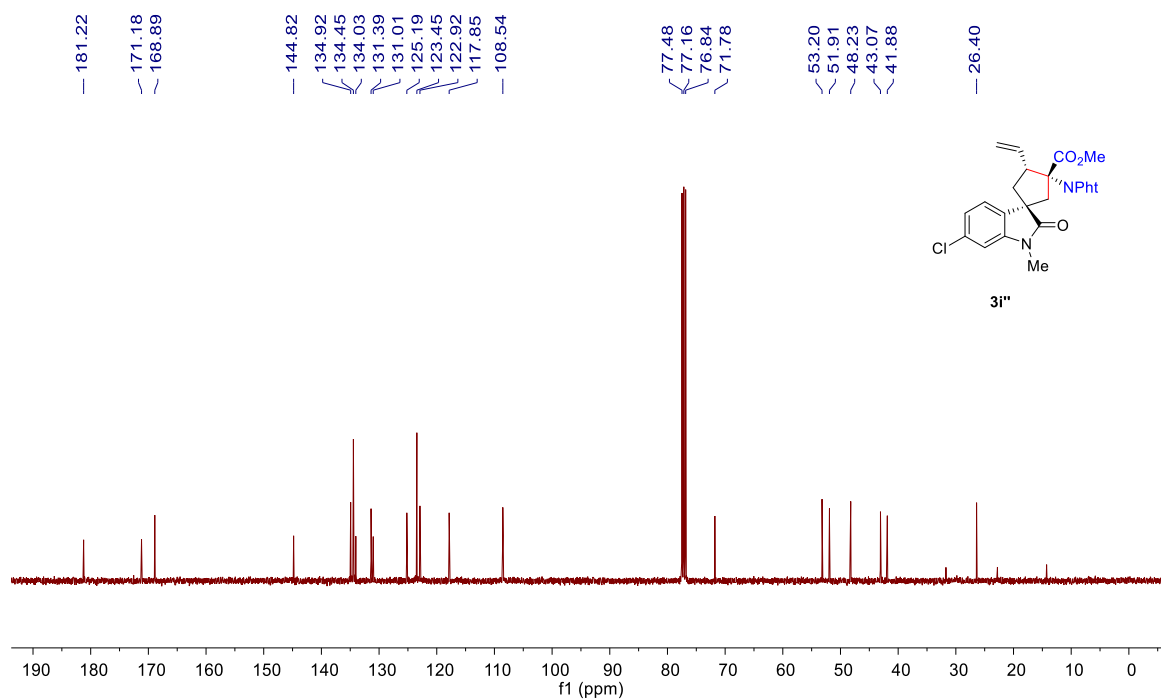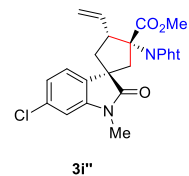

**<sup>1</sup>H NMR (400 MHz, CDCl<sub>3</sub>) of 3j**

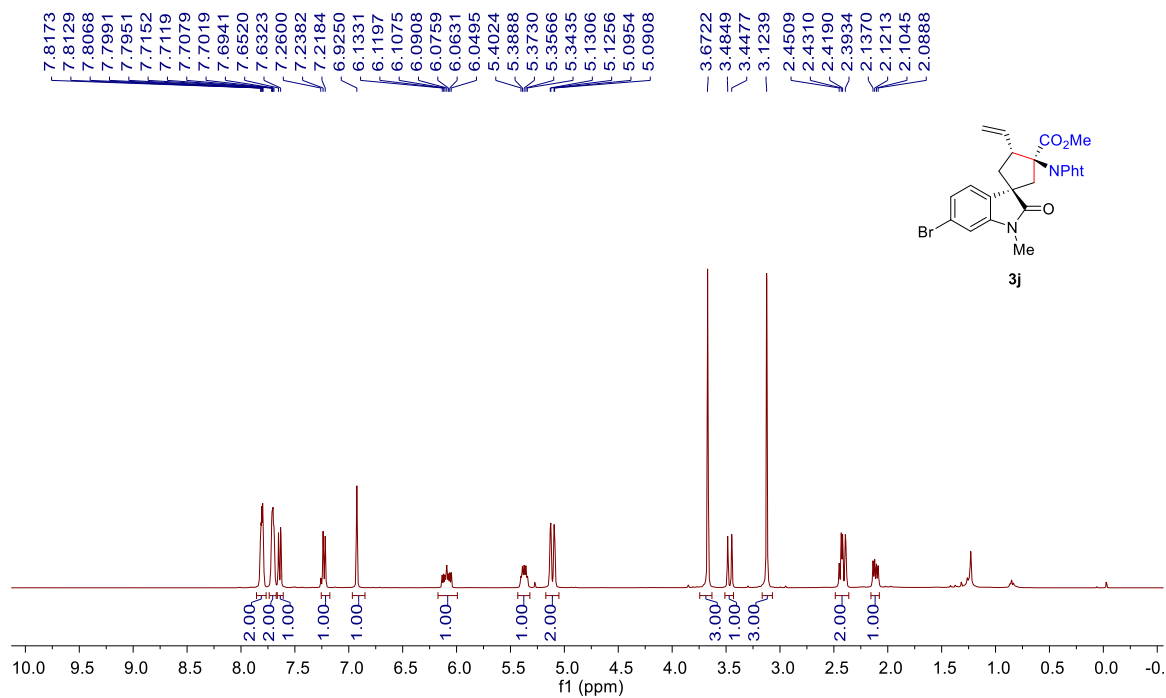

**<sup>13</sup>C NMR (101 MHz, CDCl<sub>3</sub>) of 3j**

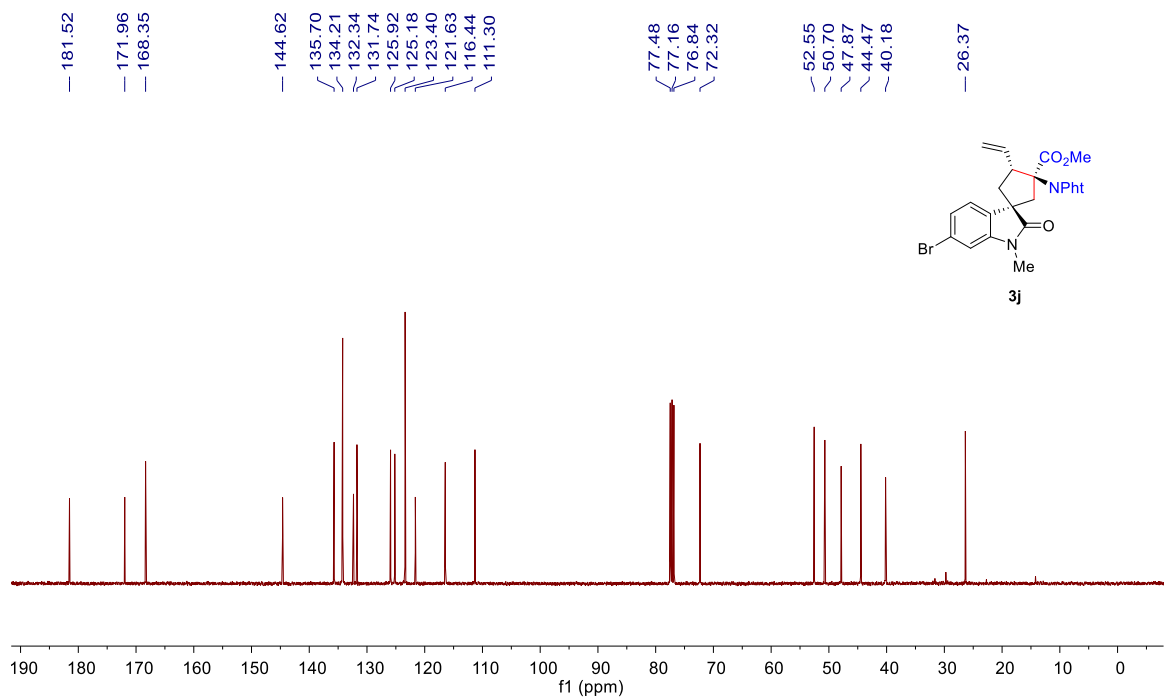

**<sup>1</sup>H NMR (400 MHz, CDCl<sub>3</sub>) of 3j'**

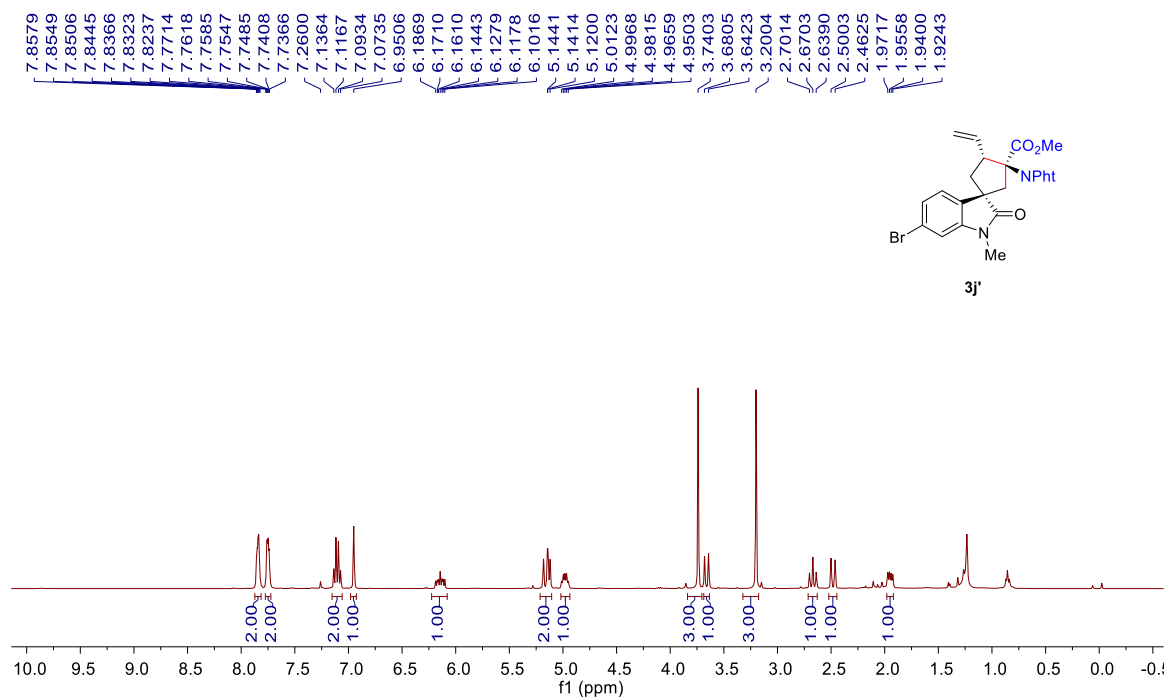

**<sup>13</sup>C NMR (101 MHz, CDCl<sub>3</sub>) of 3j'**

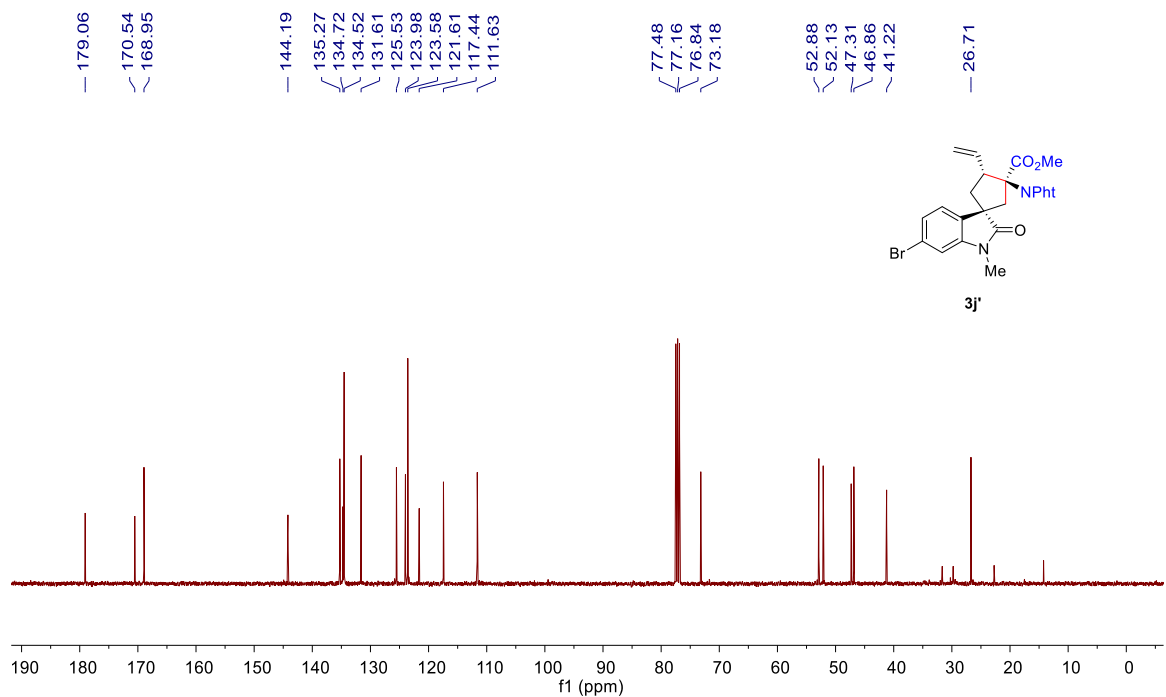

### <sup>1</sup>H NMR (400 MHz, CDCl<sub>3</sub>) of 3j''

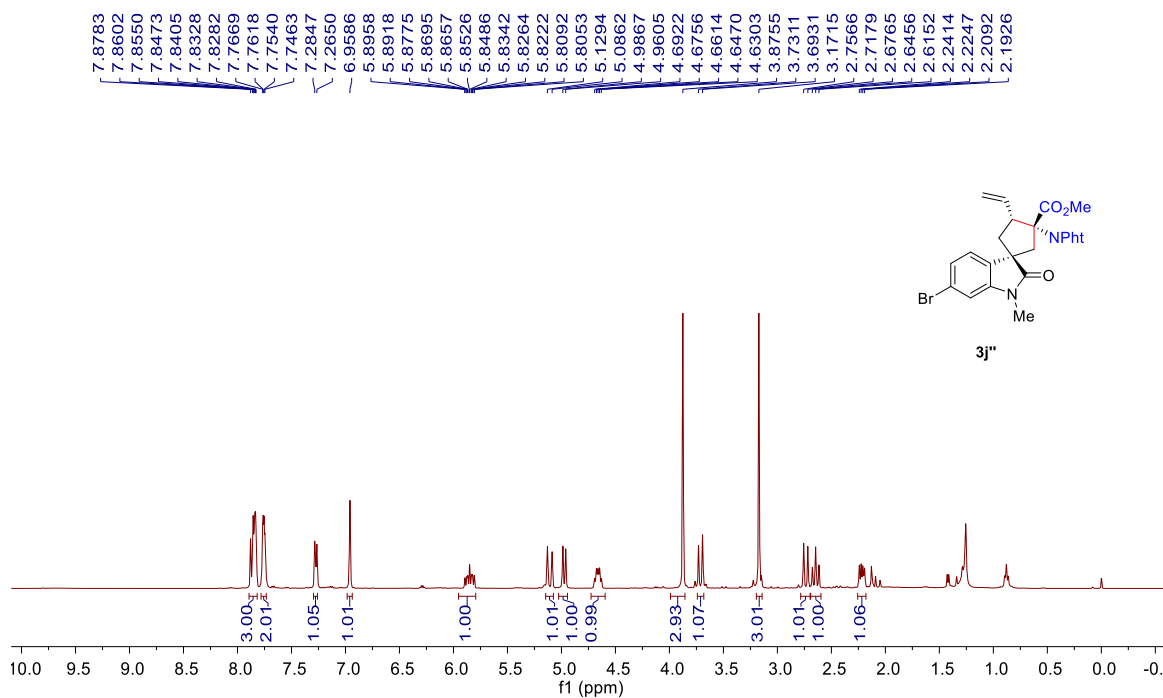

### <sup>13</sup>C NMR (101 MHz, CDCl<sub>3</sub>) of 3j''

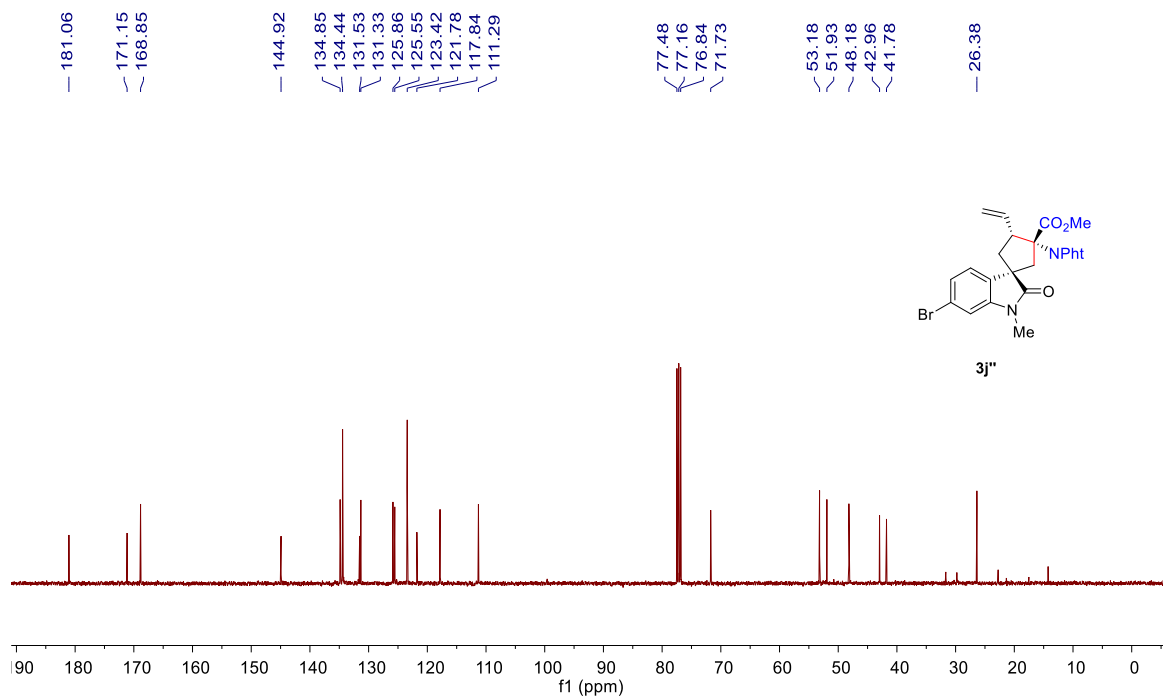

**<sup>1</sup>H NMR (400 MHz, CDCl<sub>3</sub>) of 3k**

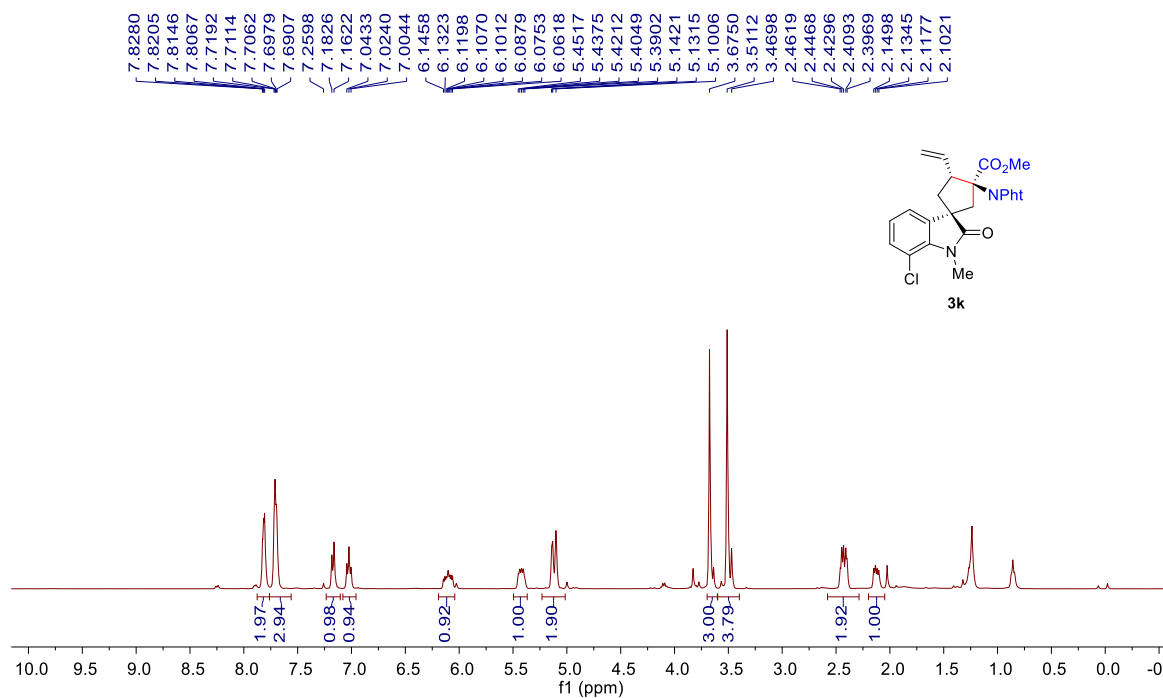

**<sup>13</sup>C NMR (101 MHz, CDCl<sub>3</sub>) of 3k**

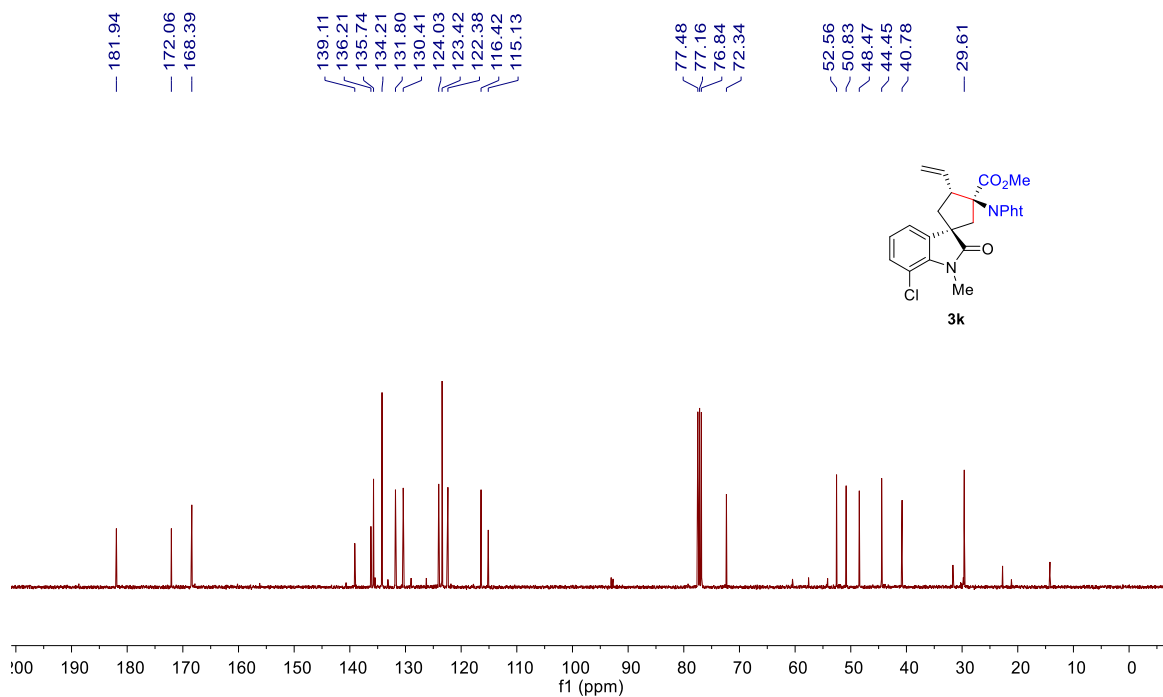

**<sup>1</sup>H NMR (400 MHz, CDCl<sub>3</sub>) of 3k'**

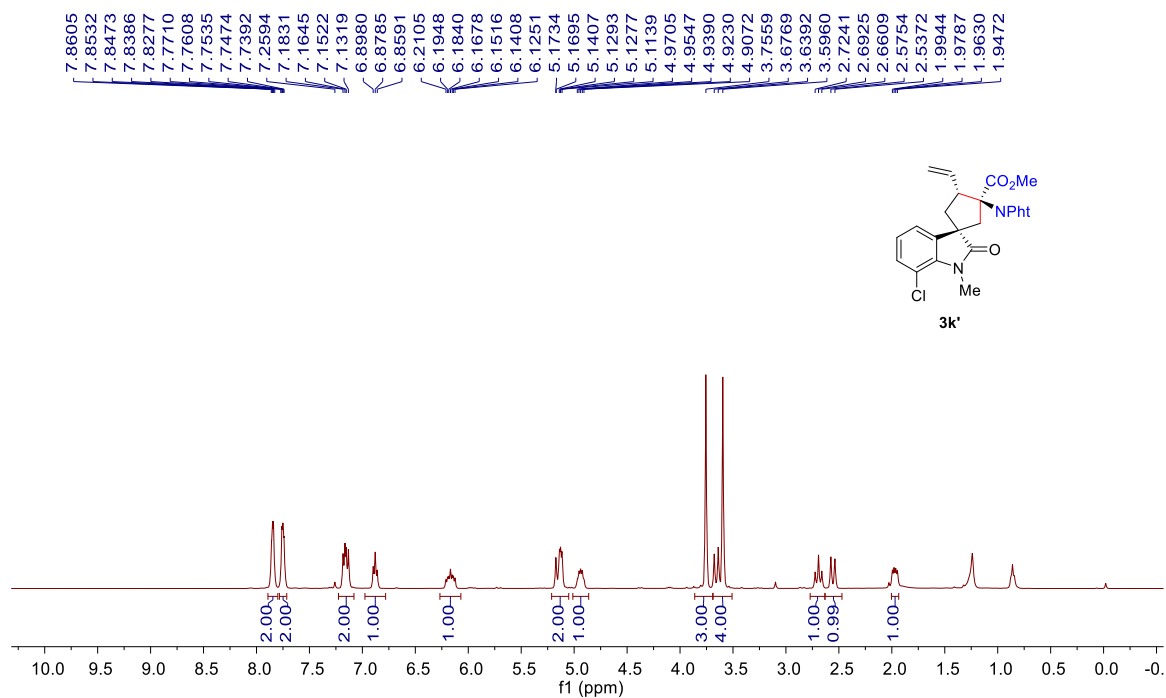

**<sup>13</sup>C NMR (101 MHz, CDCl<sub>3</sub>) of 3k'**

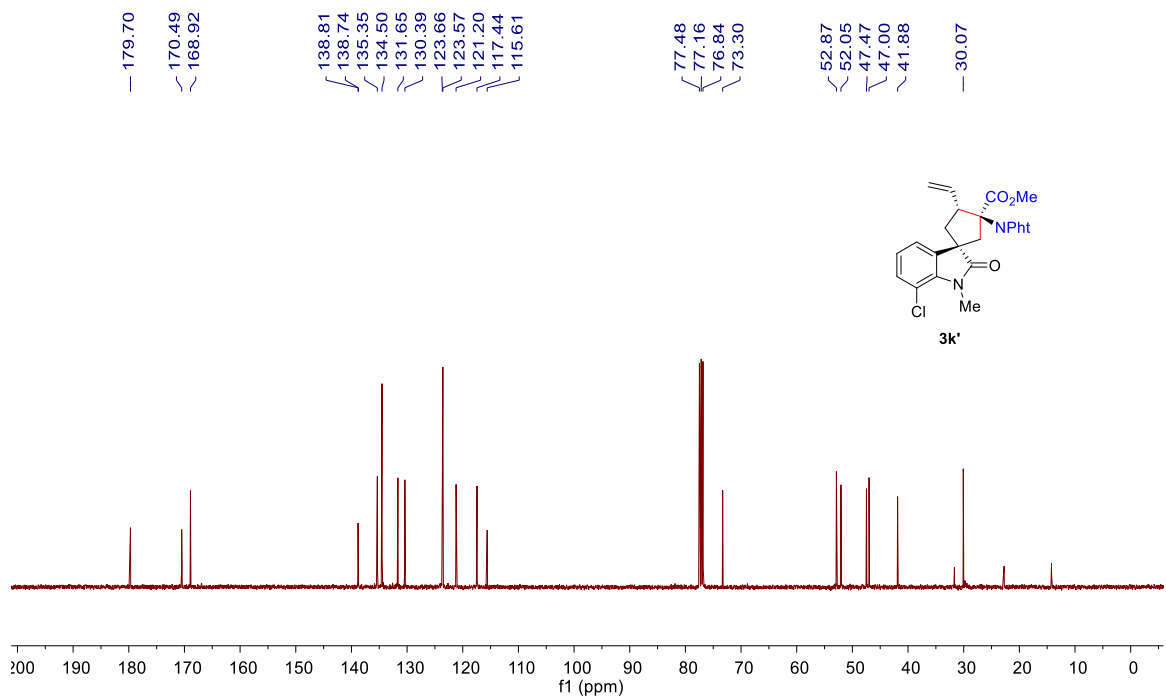

### <sup>1</sup>H NMR (400 MHz, CDCl<sub>3</sub>) of 3k''

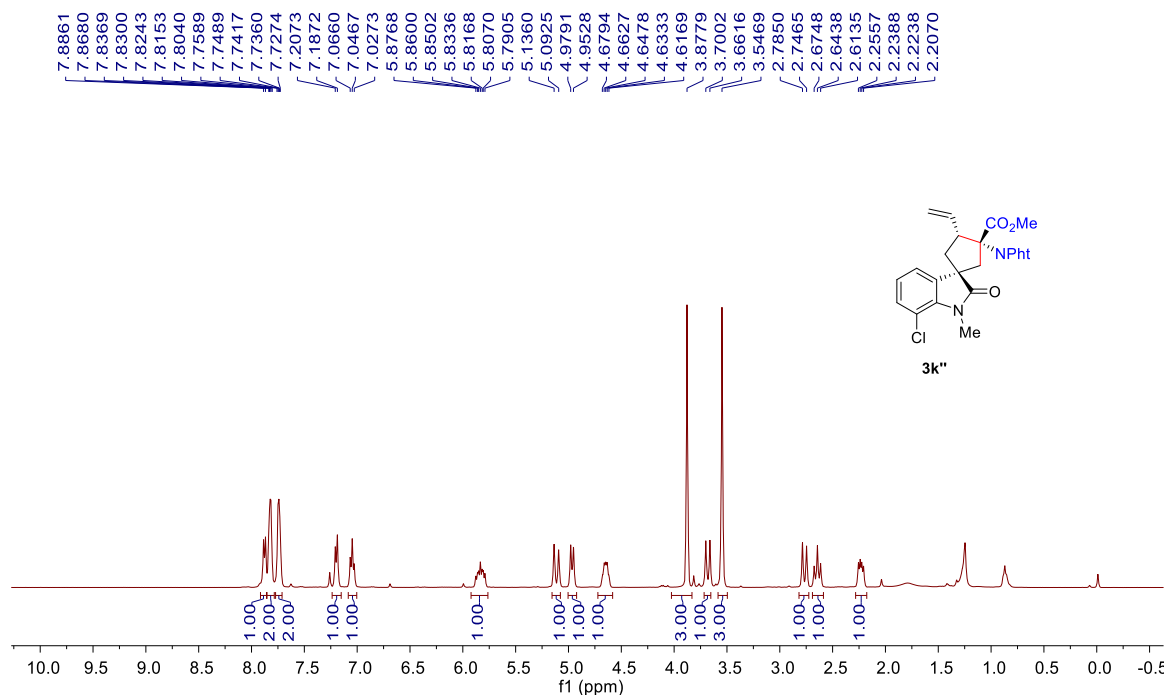

### <sup>13</sup>C NMR (101 MHz, CDCl<sub>3</sub>) of 3k''

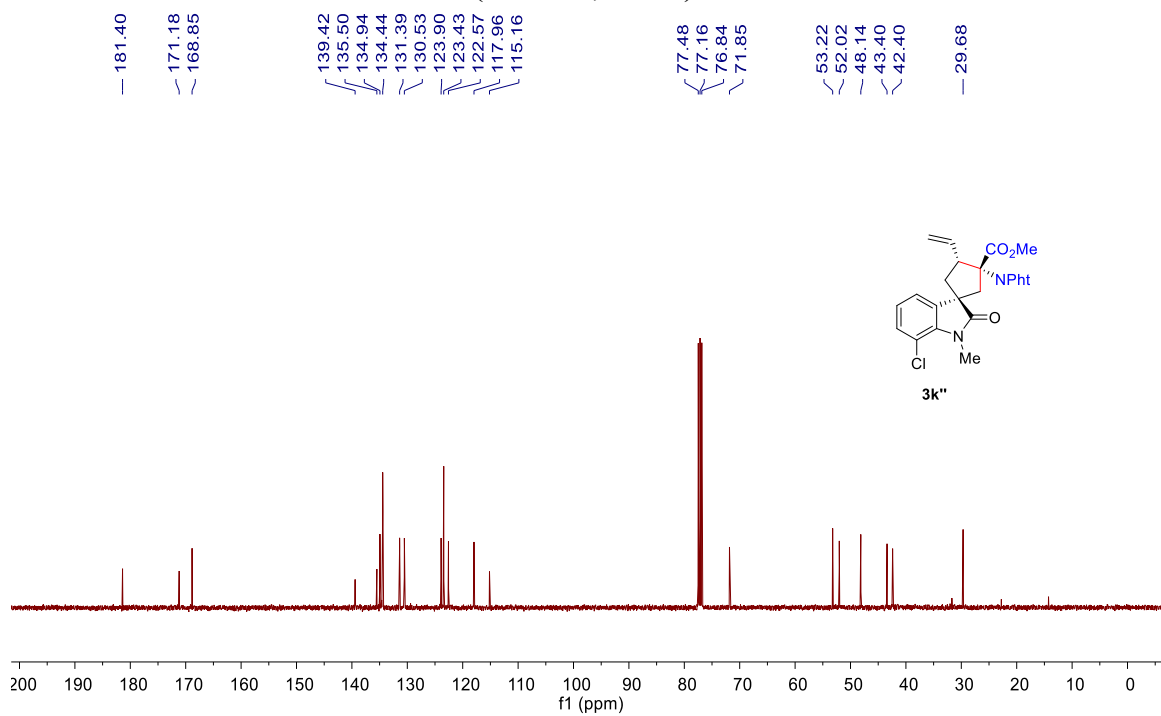

**<sup>1</sup>H NMR (400 MHz, CDCl<sub>3</sub>) of 31**

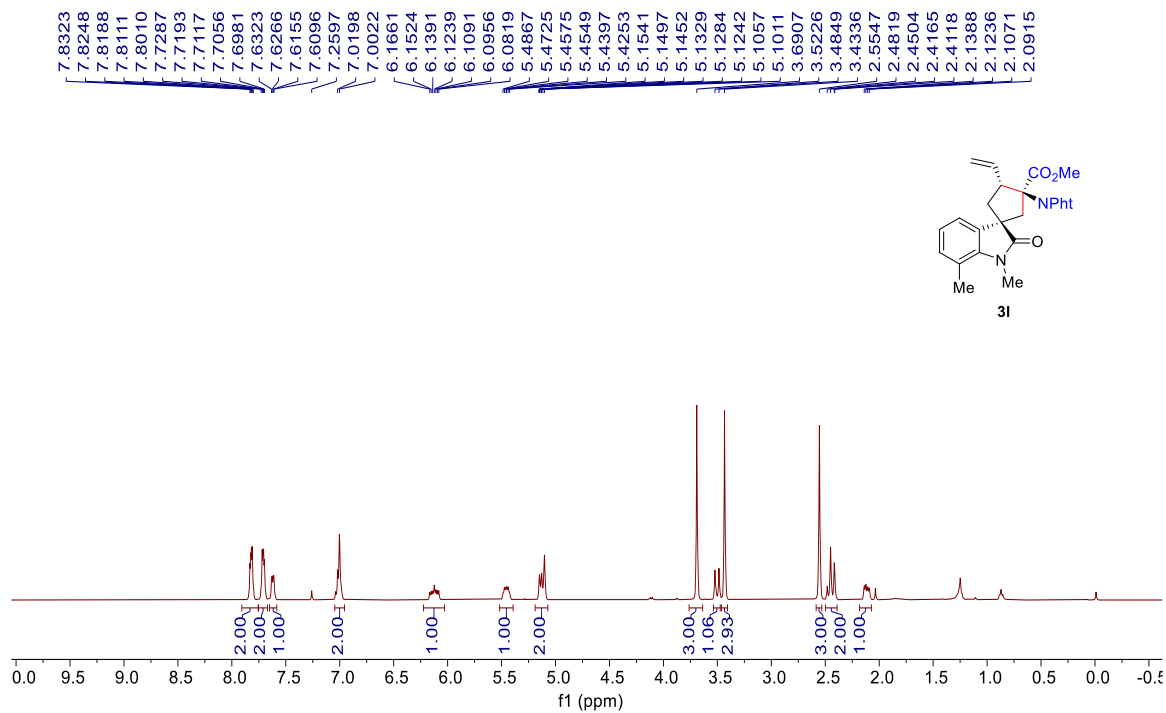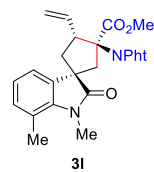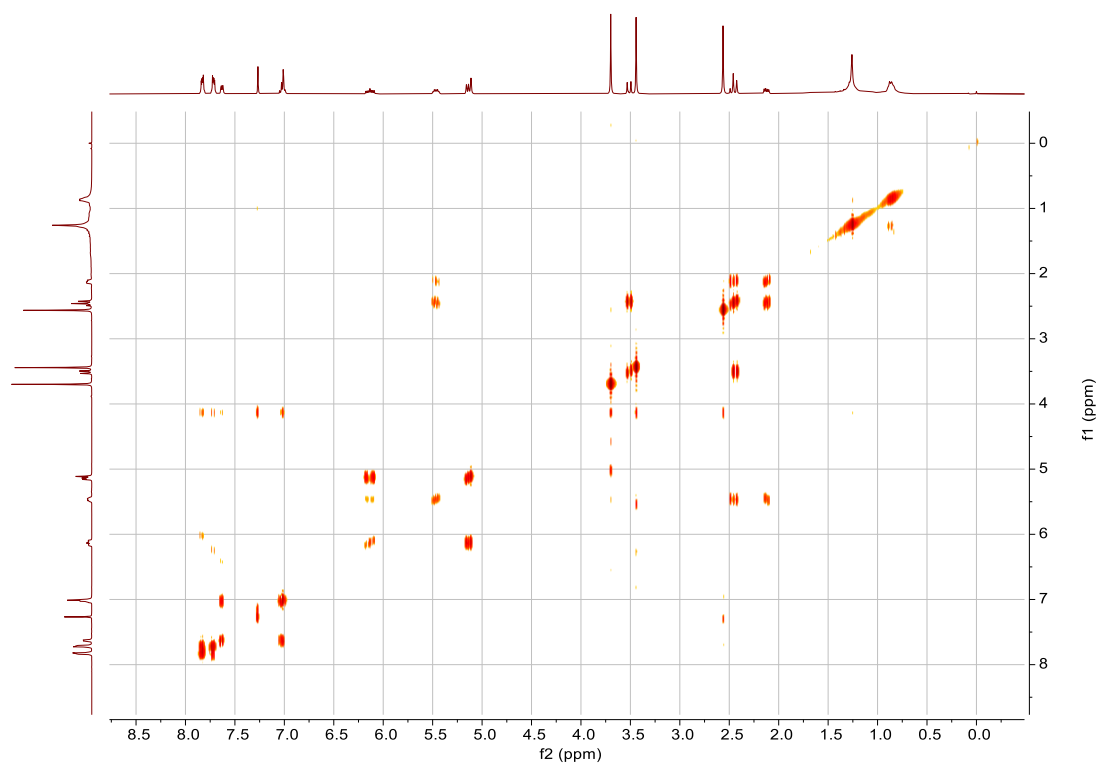

**<sup>13</sup>C NMR (101 MHz, CDCl<sub>3</sub>) of 31**

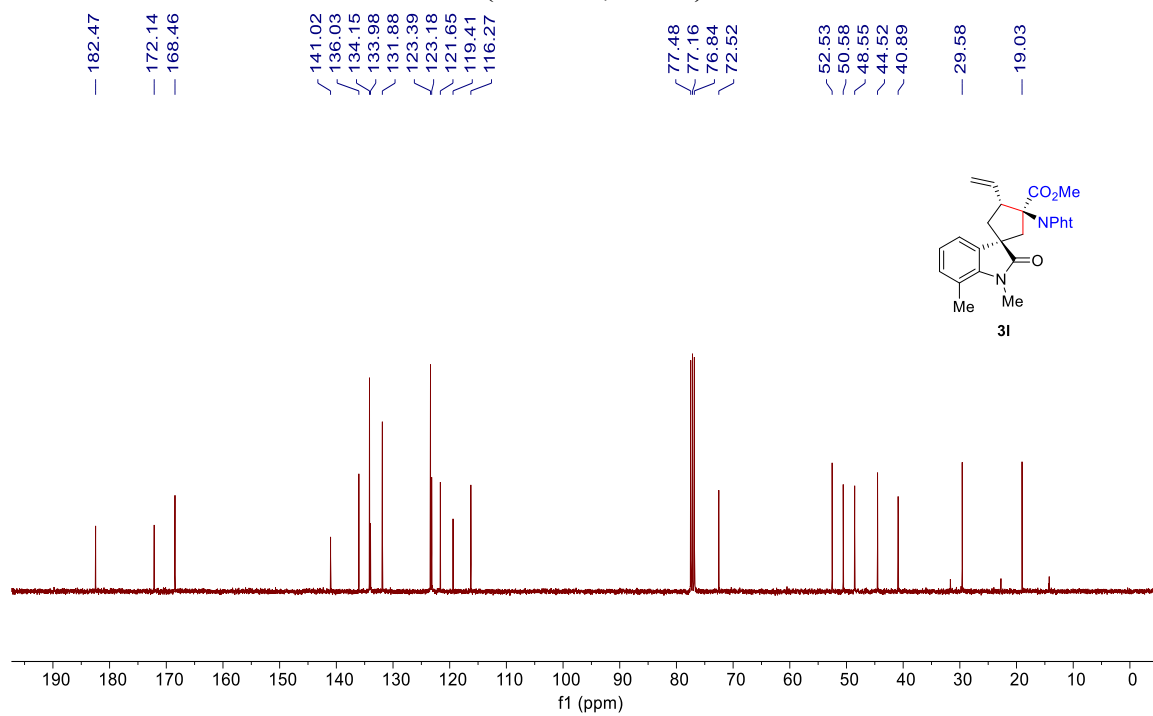

**<sup>1</sup>H NMR (400 MHz, CDCl<sub>3</sub>) of 31'**

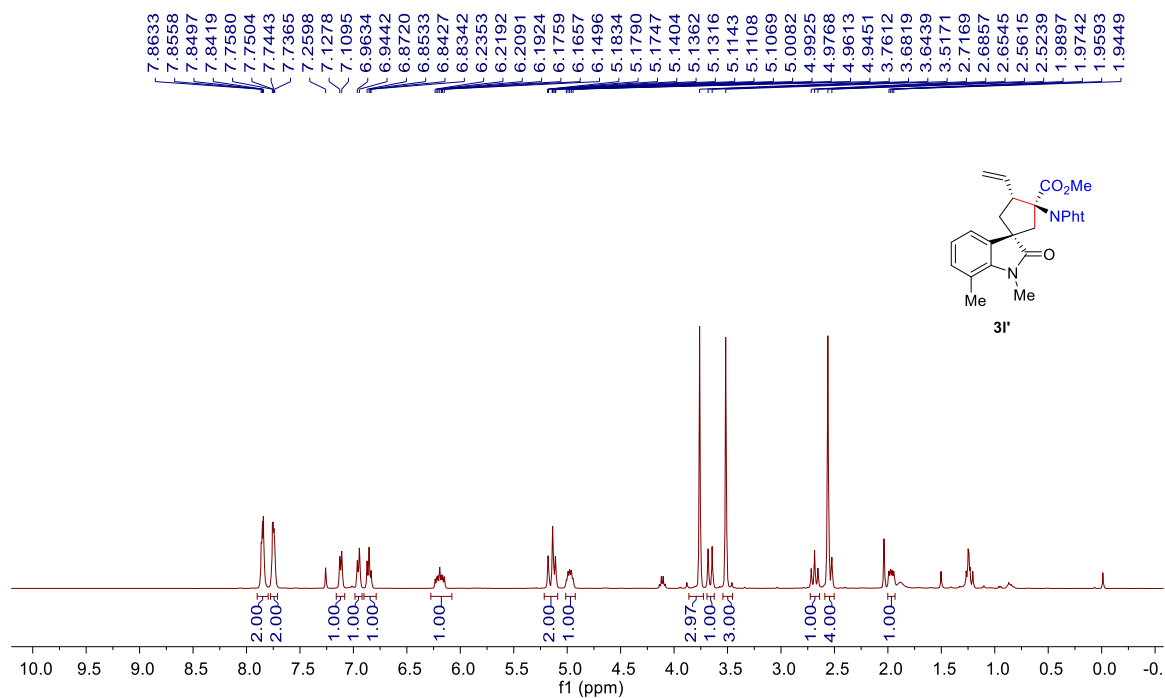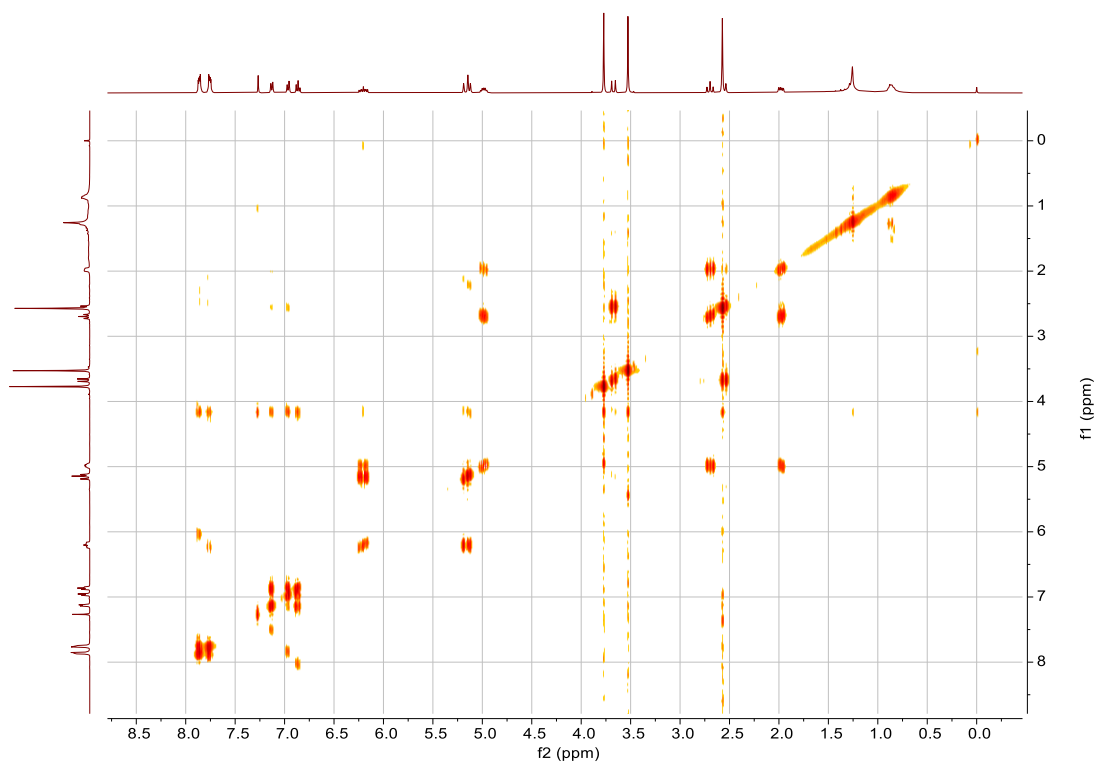

**<sup>13</sup>C NMR (101 MHz, CDCl<sub>3</sub>) of 3I'**

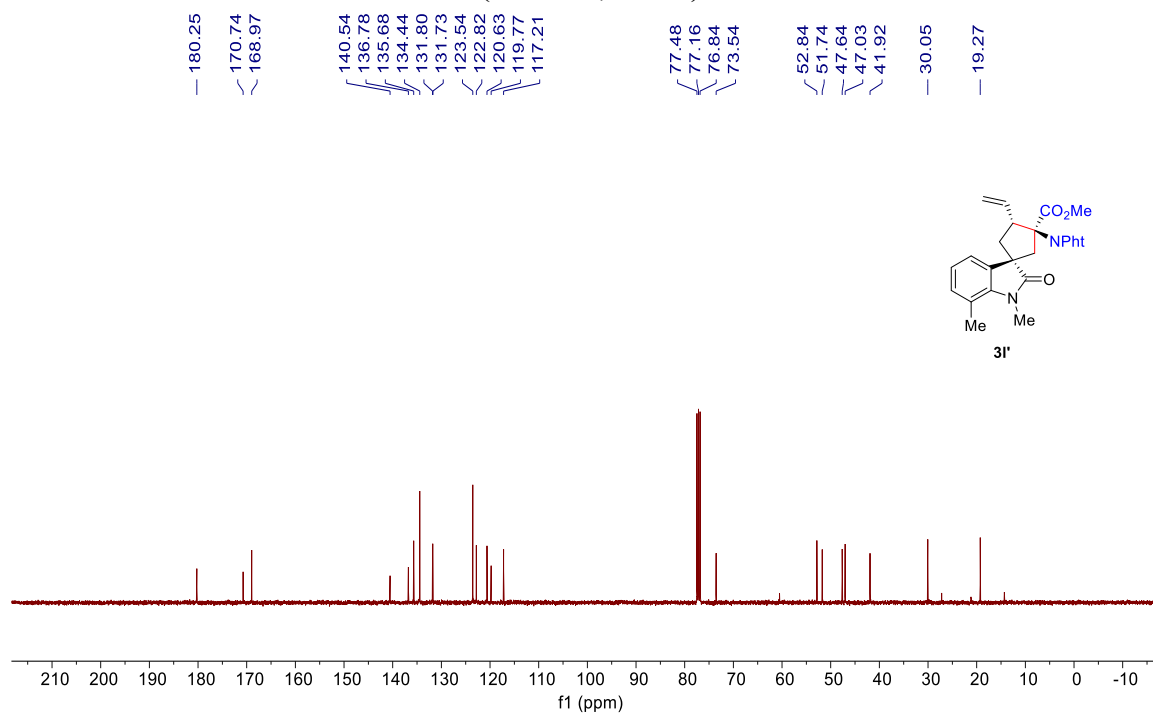

**<sup>1</sup>H NMR (400 MHz, CDCl<sub>3</sub>) of 31''**

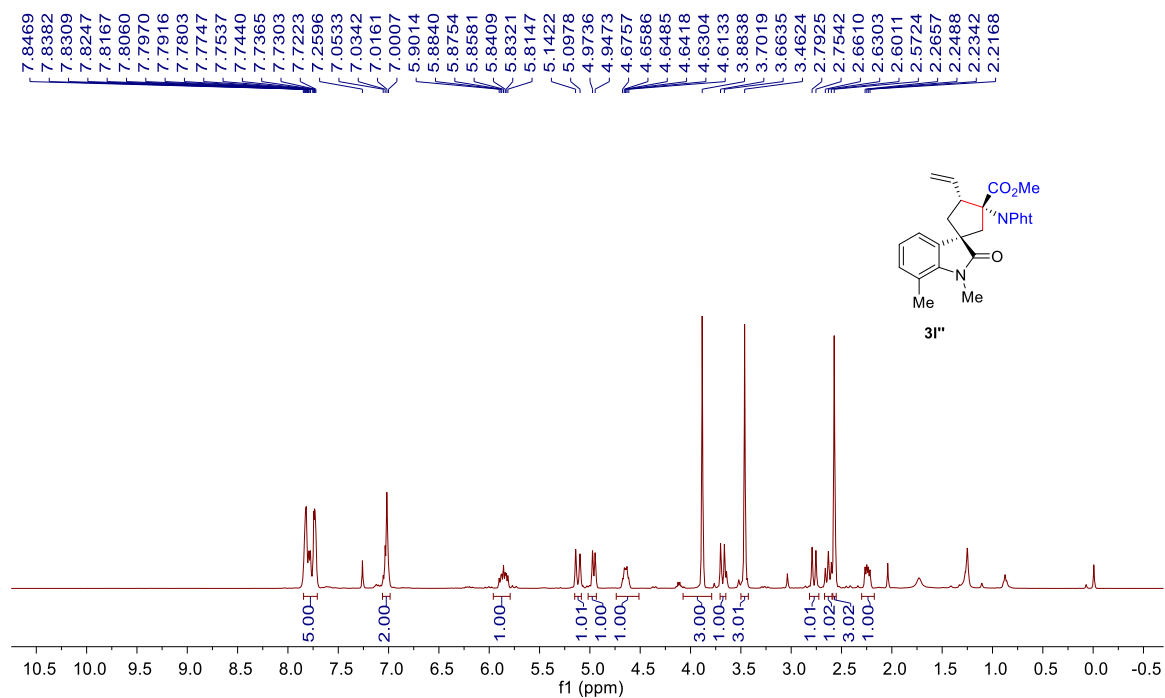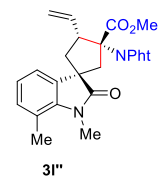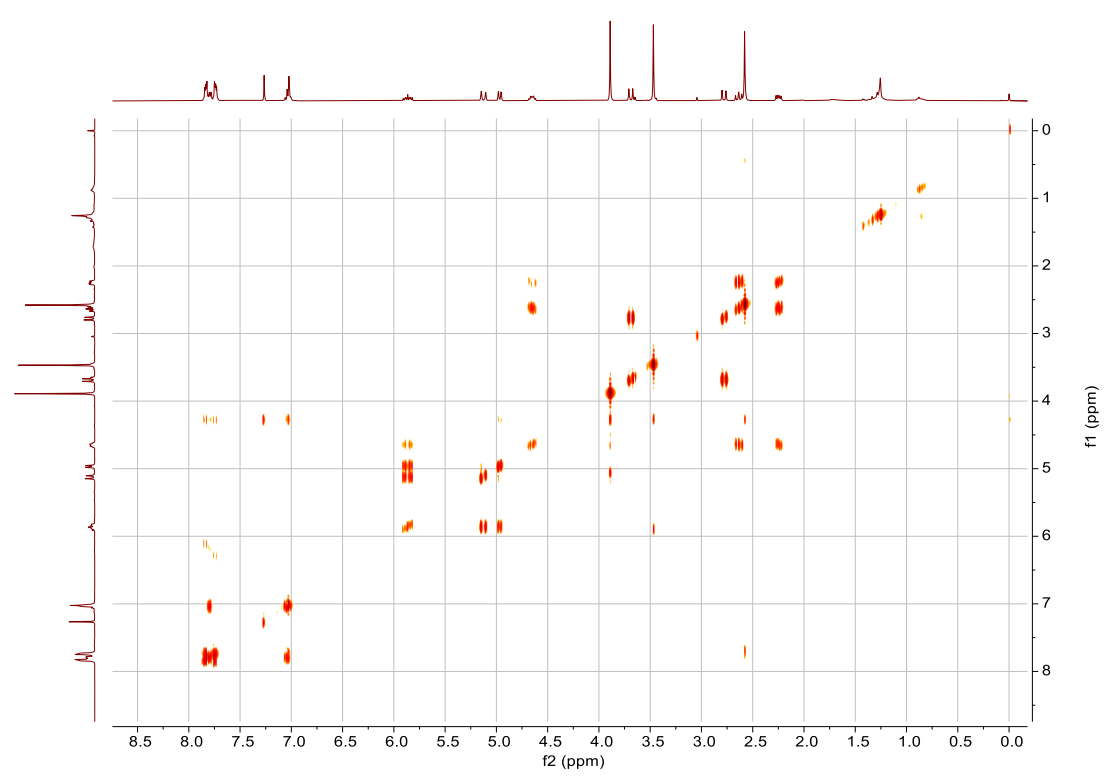

<sup>13</sup>C NMR (101 MHz, CDCl<sub>3</sub>) of 31''

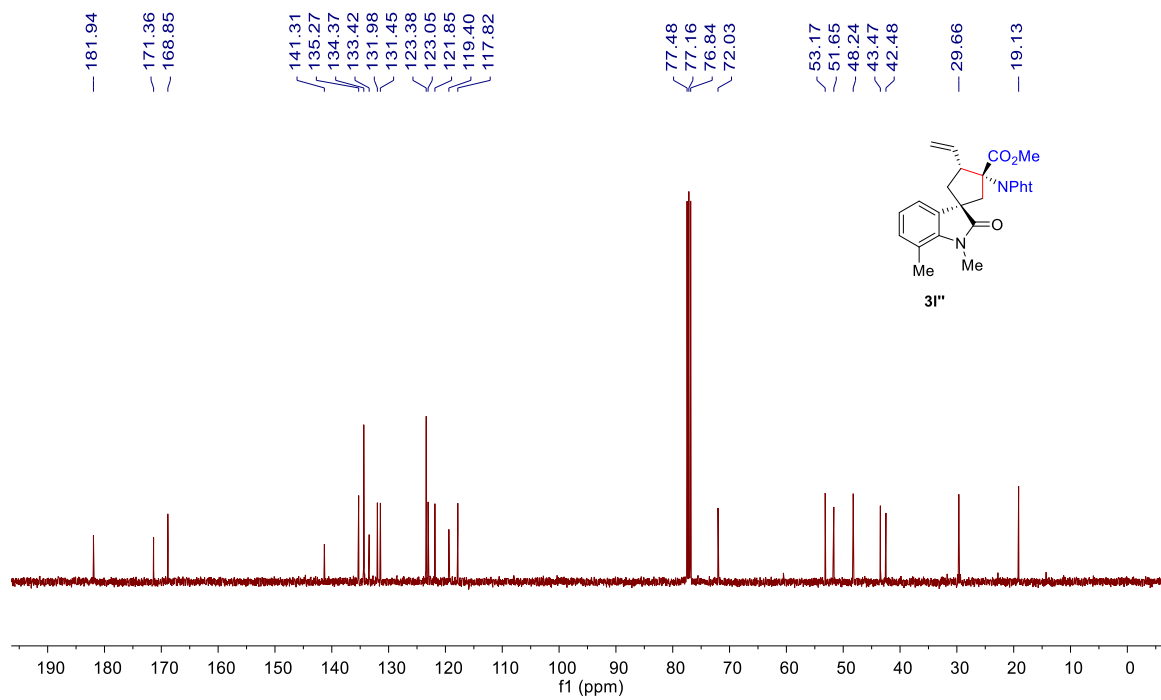

### <sup>1</sup>H NMR (400 MHz, CDCl<sub>3</sub>) of 3m

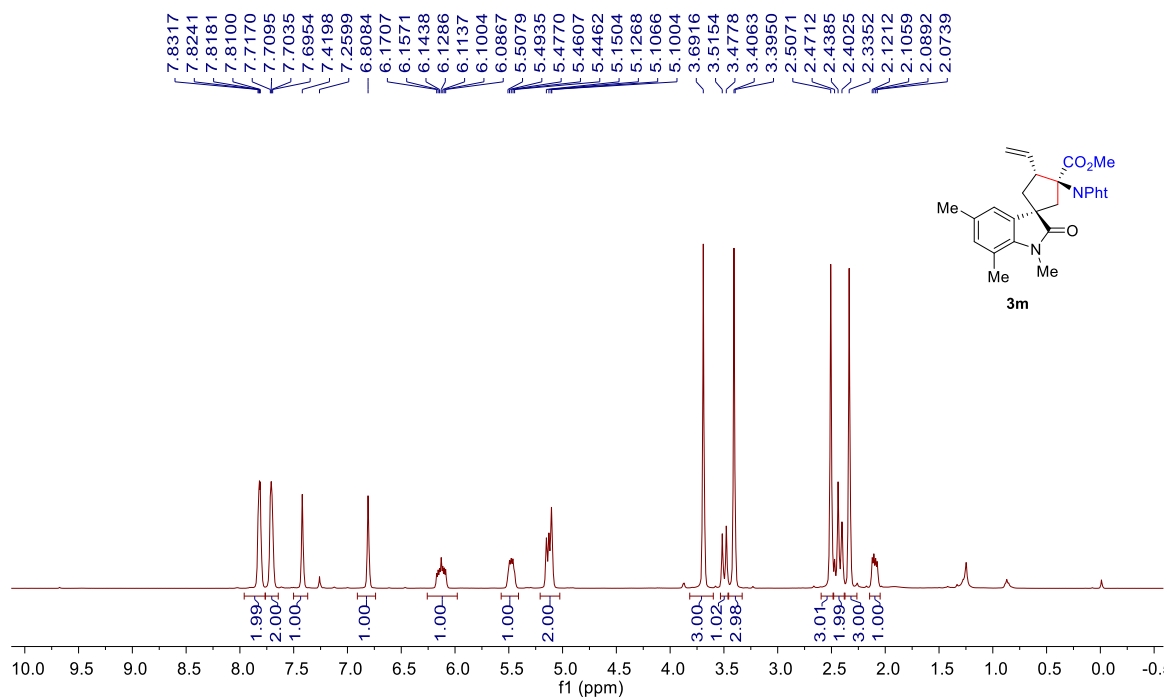

### <sup>13</sup>C NMR (101 MHz, CDCl<sub>3</sub>) of 3m

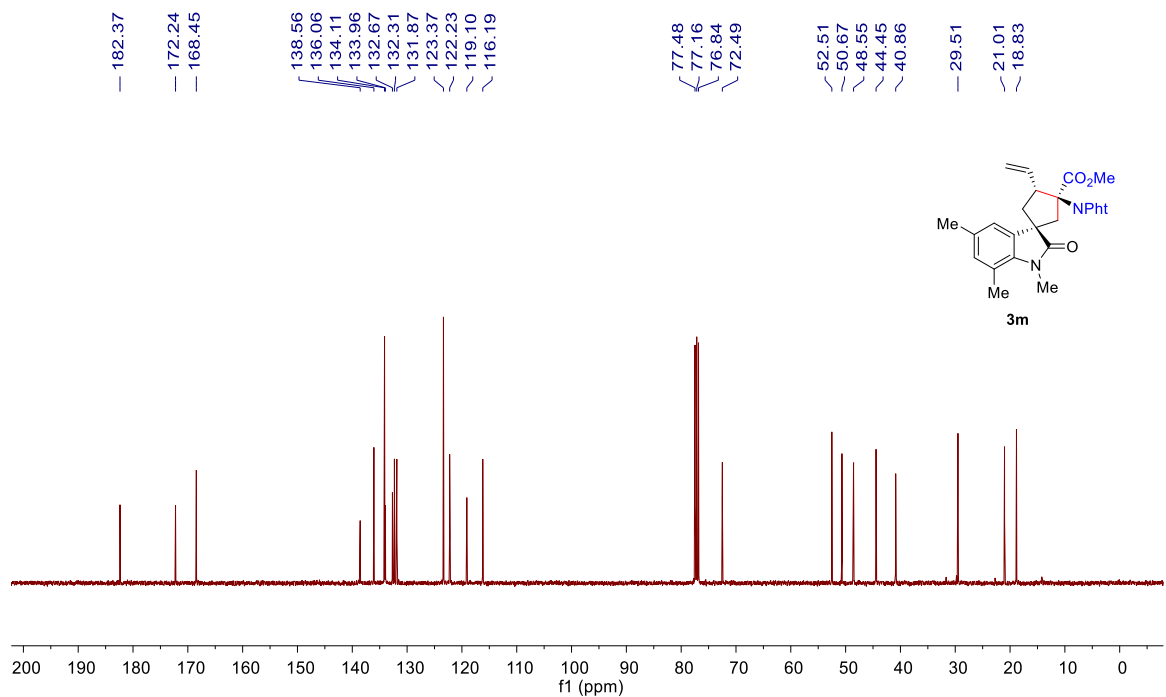

### <sup>1</sup>H NMR (400 MHz, CDCl<sub>3</sub>) of 3m'

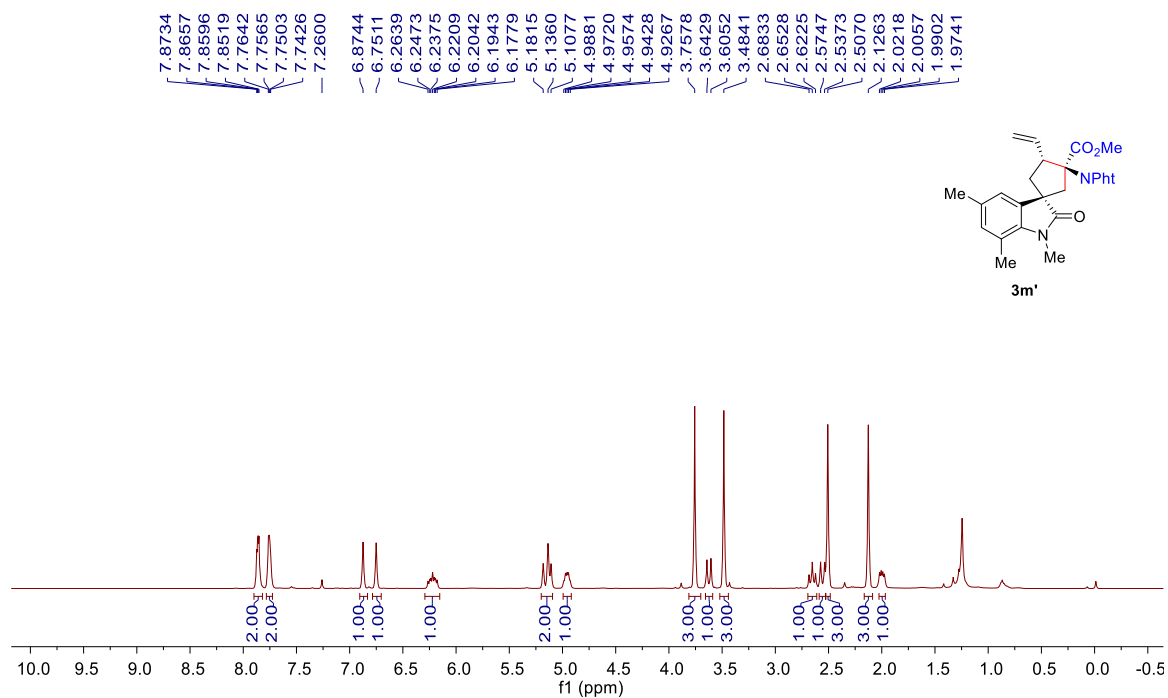

### <sup>13</sup>C NMR (101 MHz, CDCl<sub>3</sub>) of 3m'

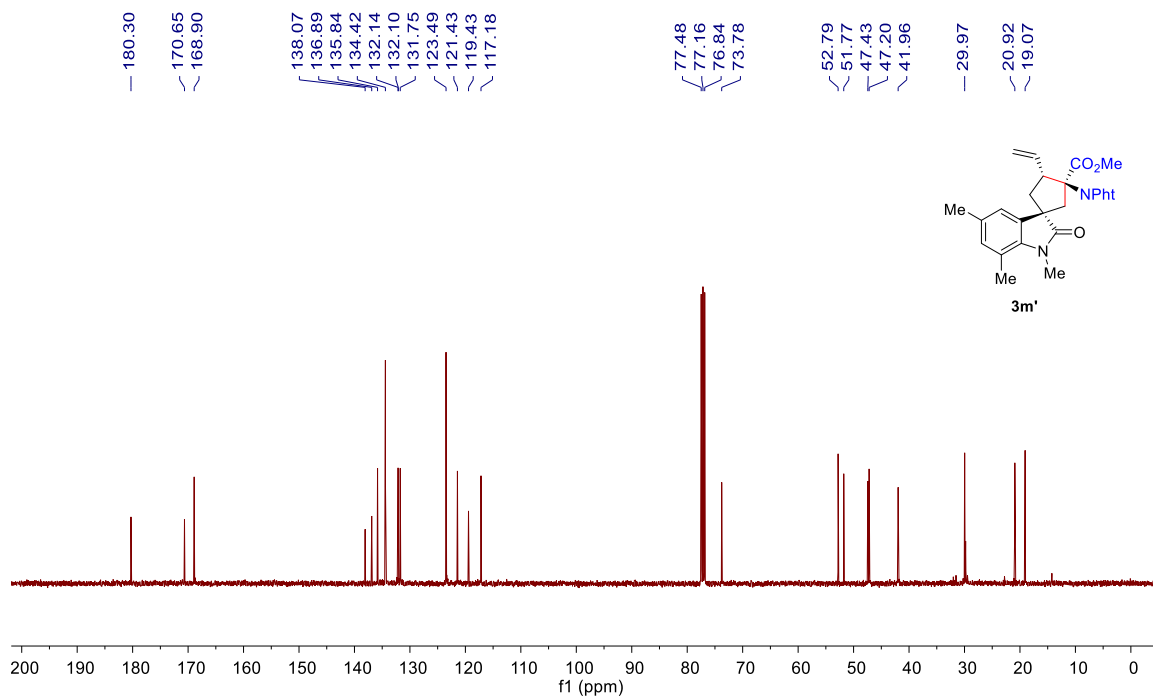

**<sup>1</sup>H NMR (400 MHz, CDCl<sub>3</sub>) of 3m''**

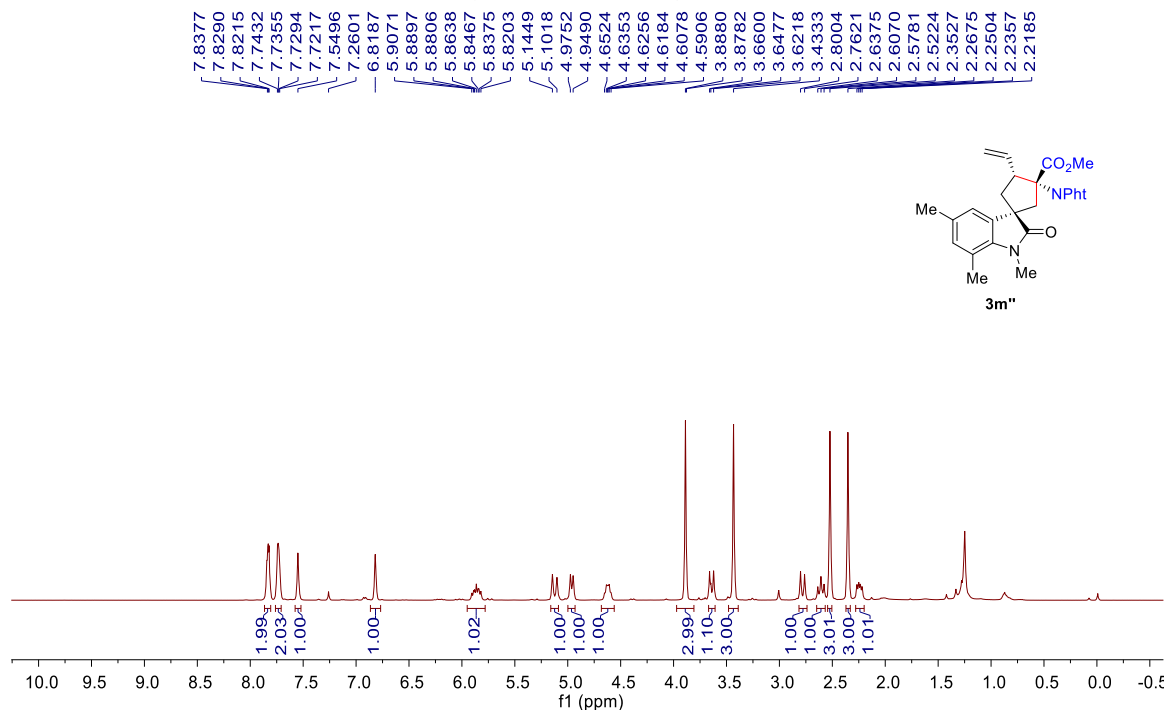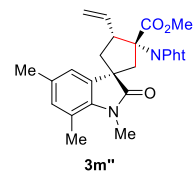

**<sup>13</sup>C NMR (101 MHz, CDCl<sub>3</sub>) of 3m''**

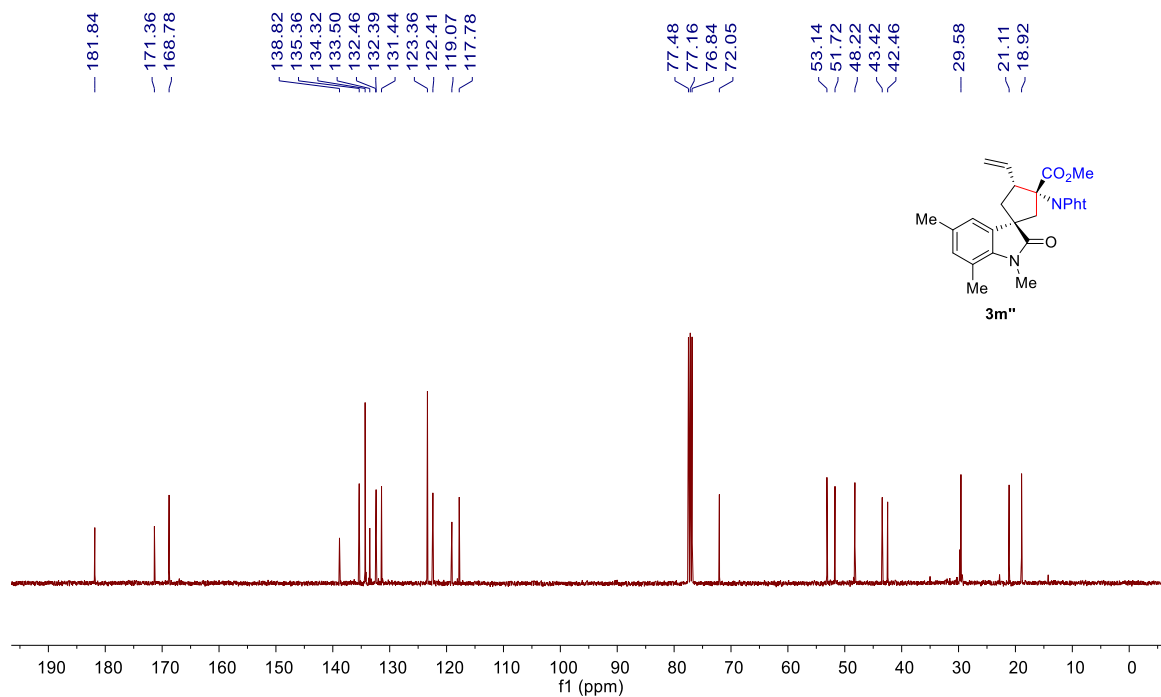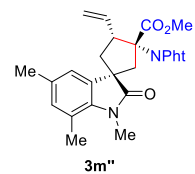

<sup>1</sup>H NMR (400 MHz, CDCl<sub>3</sub>) of 3n

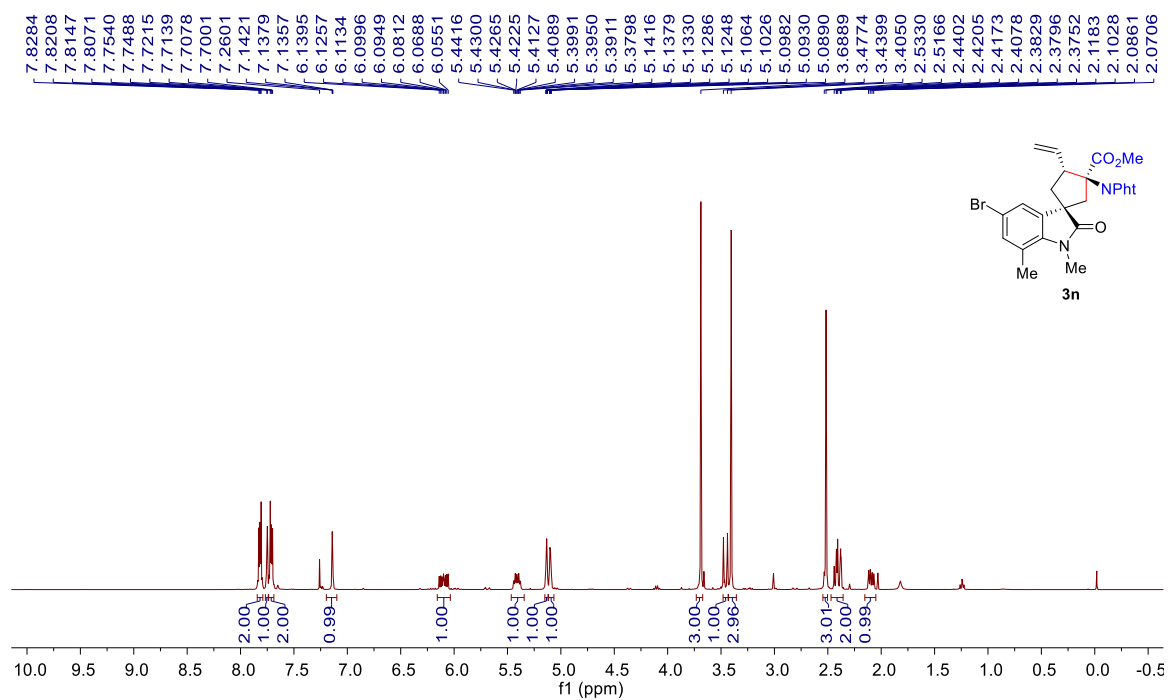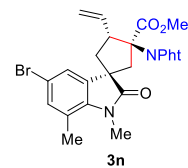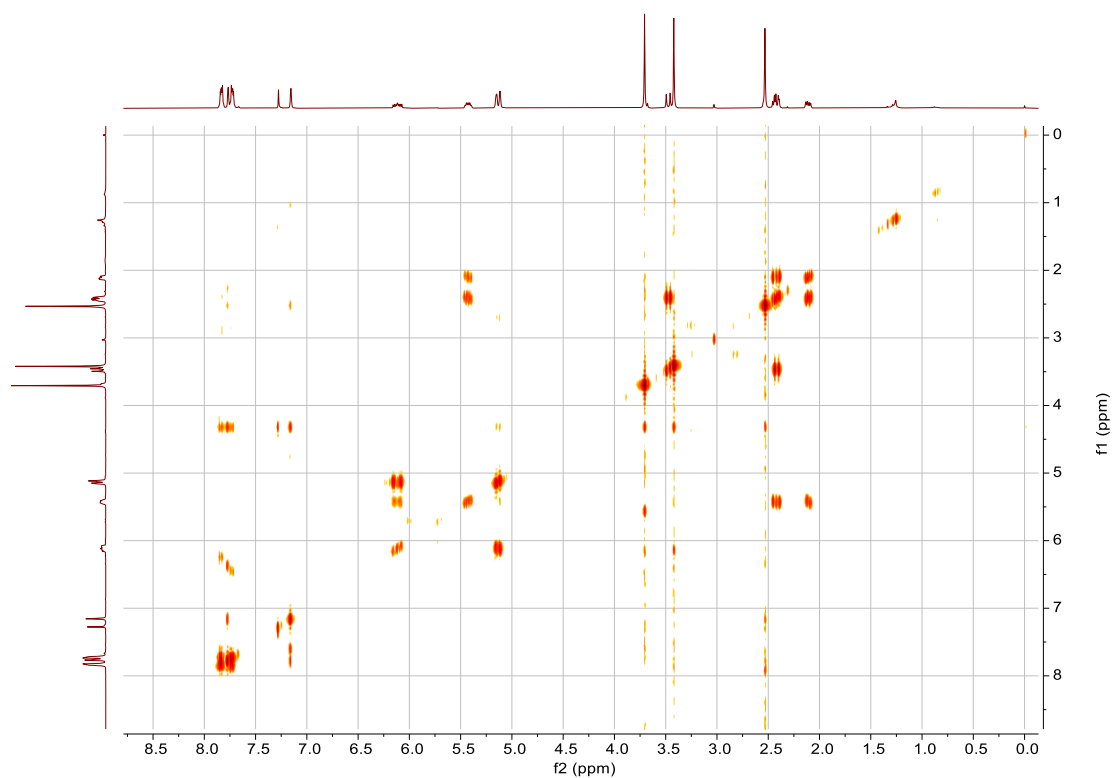

**<sup>13</sup>C NMR (101 MHz, CDCl<sub>3</sub>) of 3n**

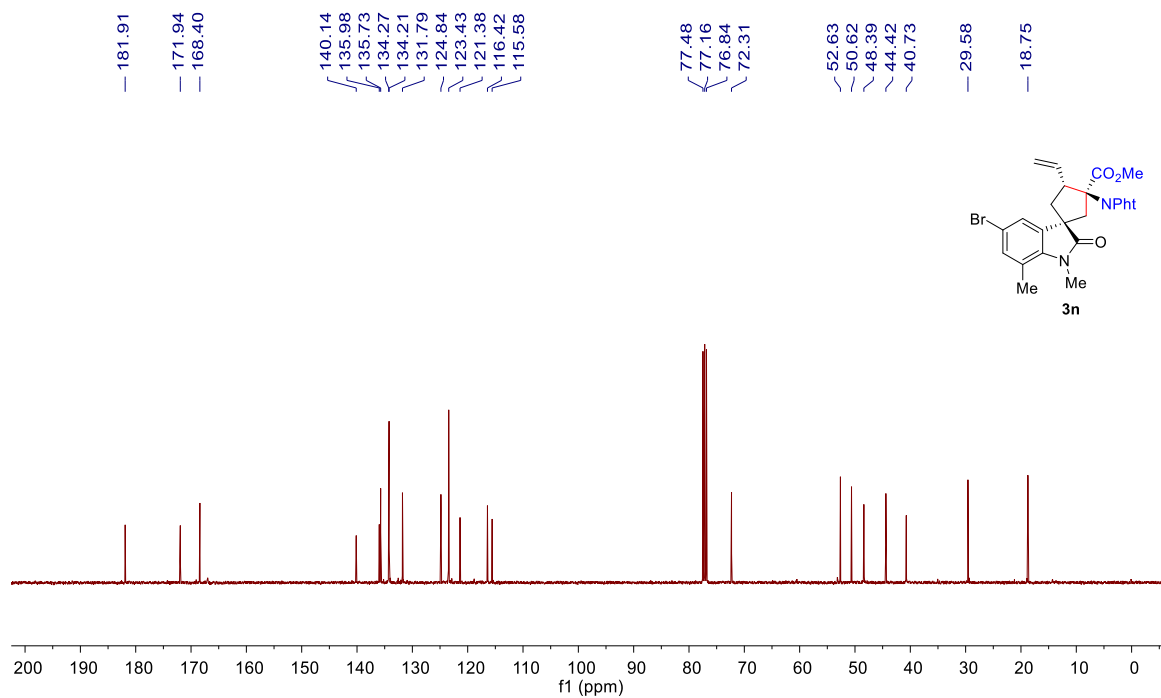

**<sup>1</sup>H NMR (400 MHz, CDCl<sub>3</sub>) of 3n'**

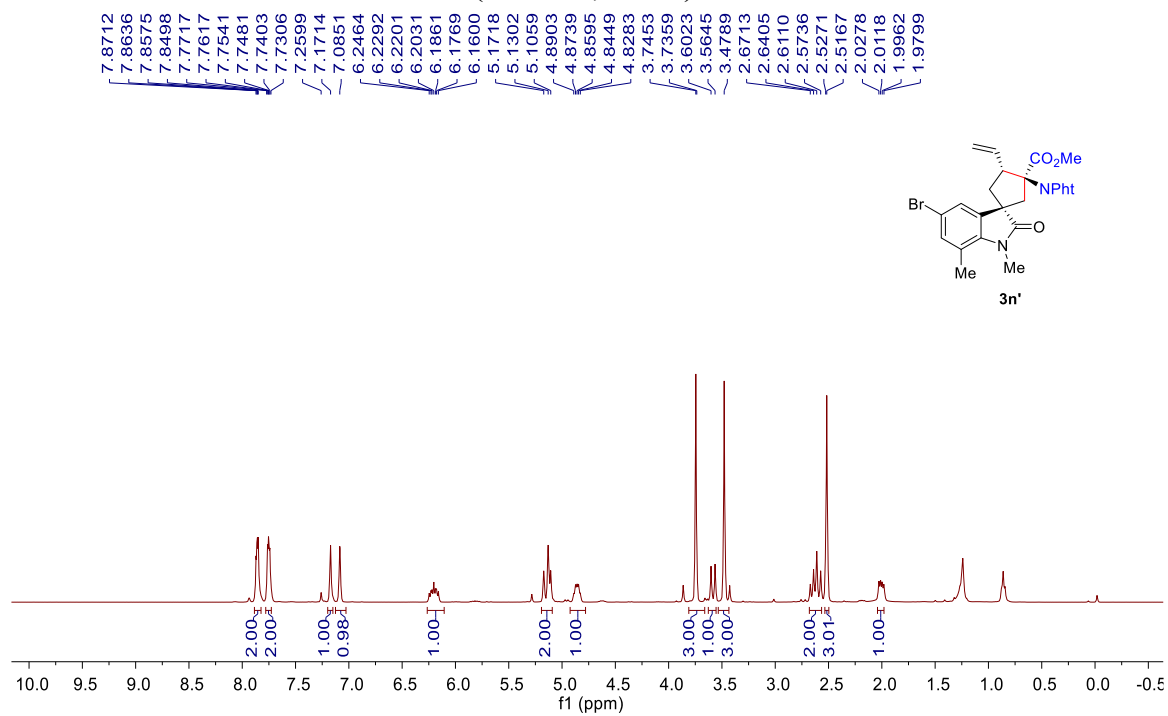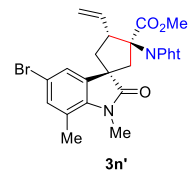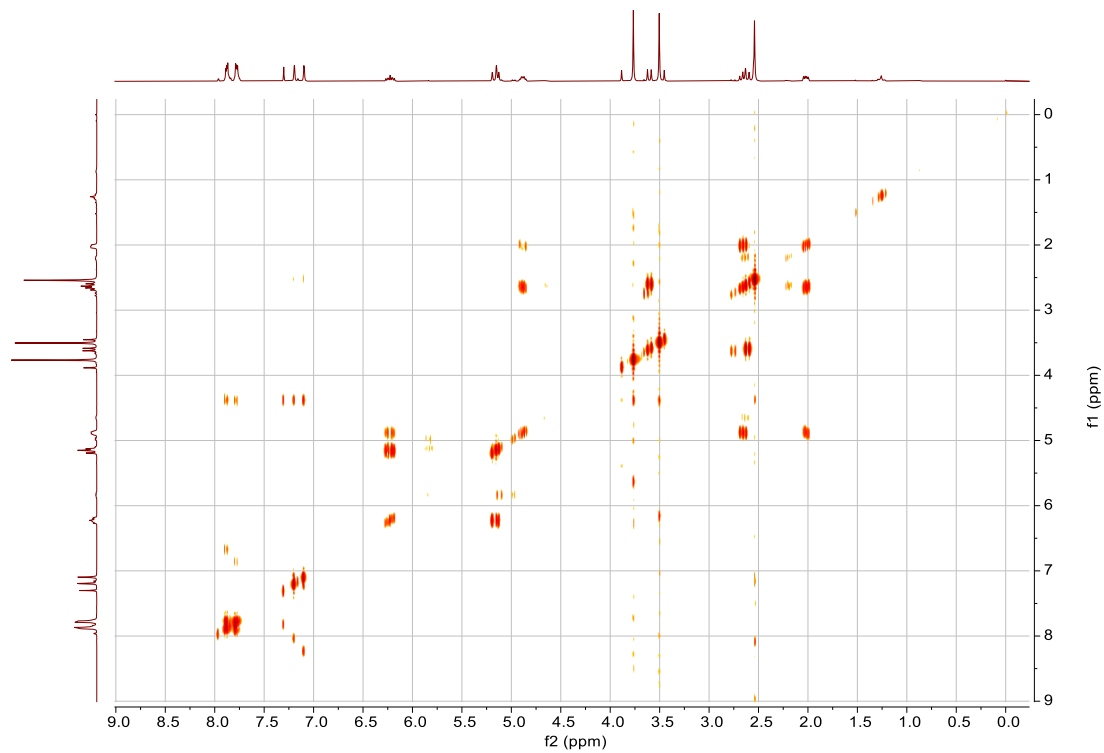

**<sup>13</sup>C NMR (101 MHz, CDCl<sub>3</sub>) of 3n'**

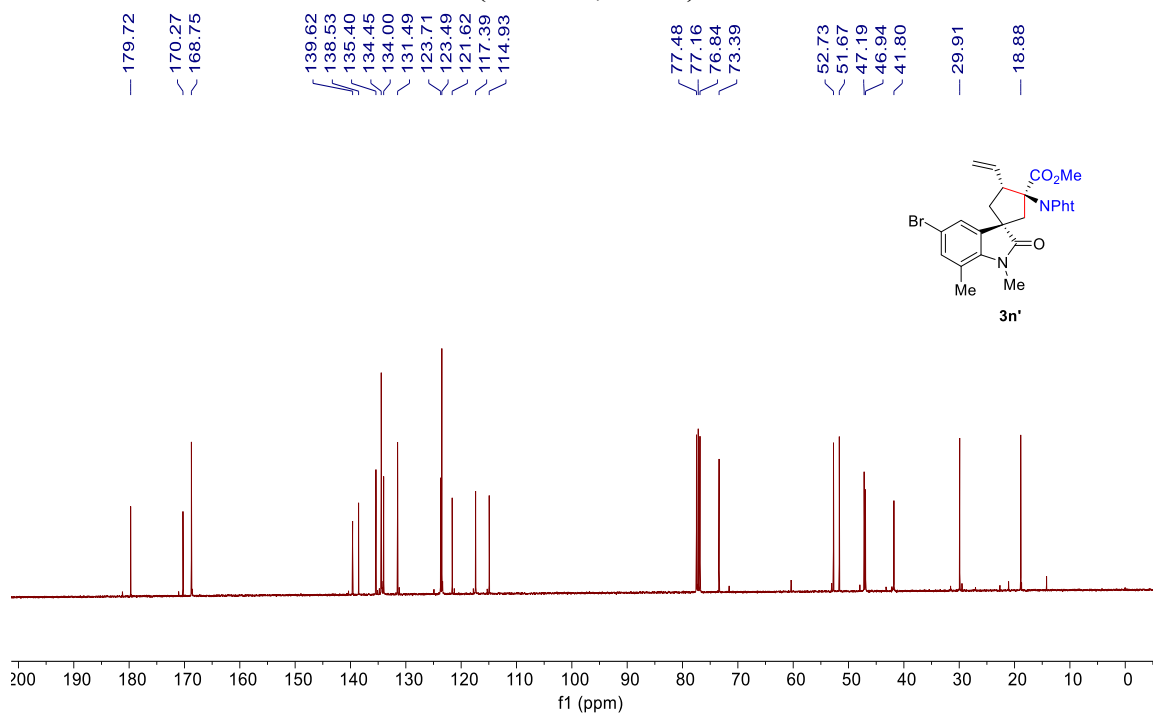

**<sup>1</sup>H NMR (400 MHz, CDCl<sub>3</sub>) of 3n''**

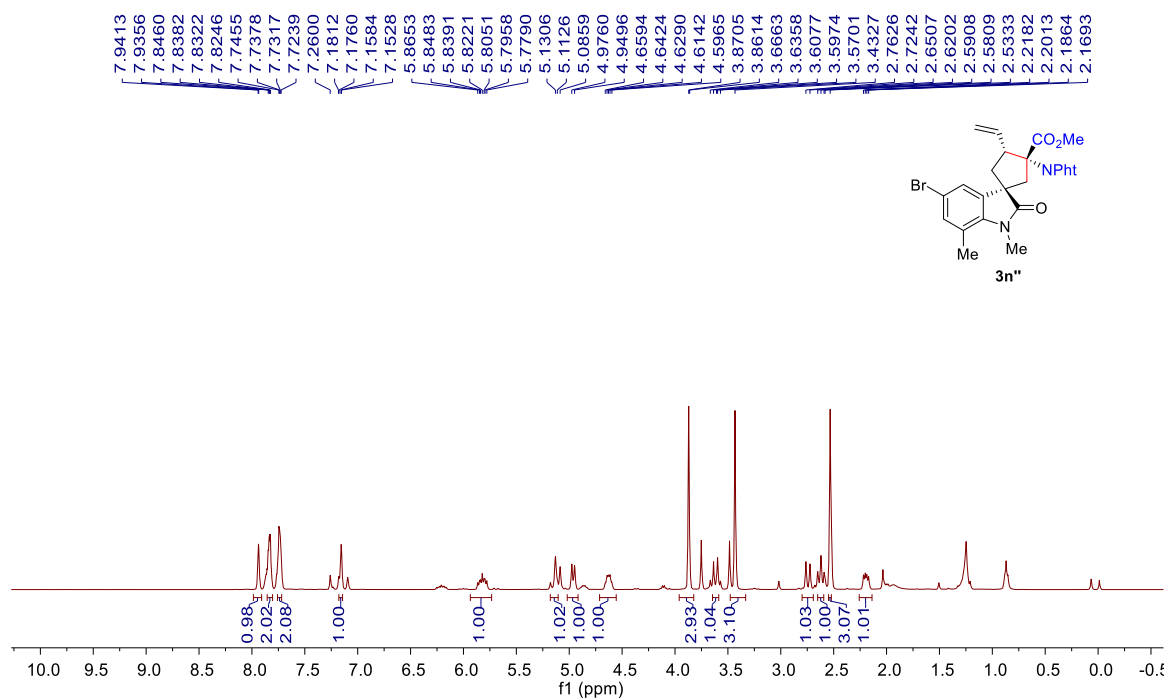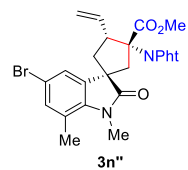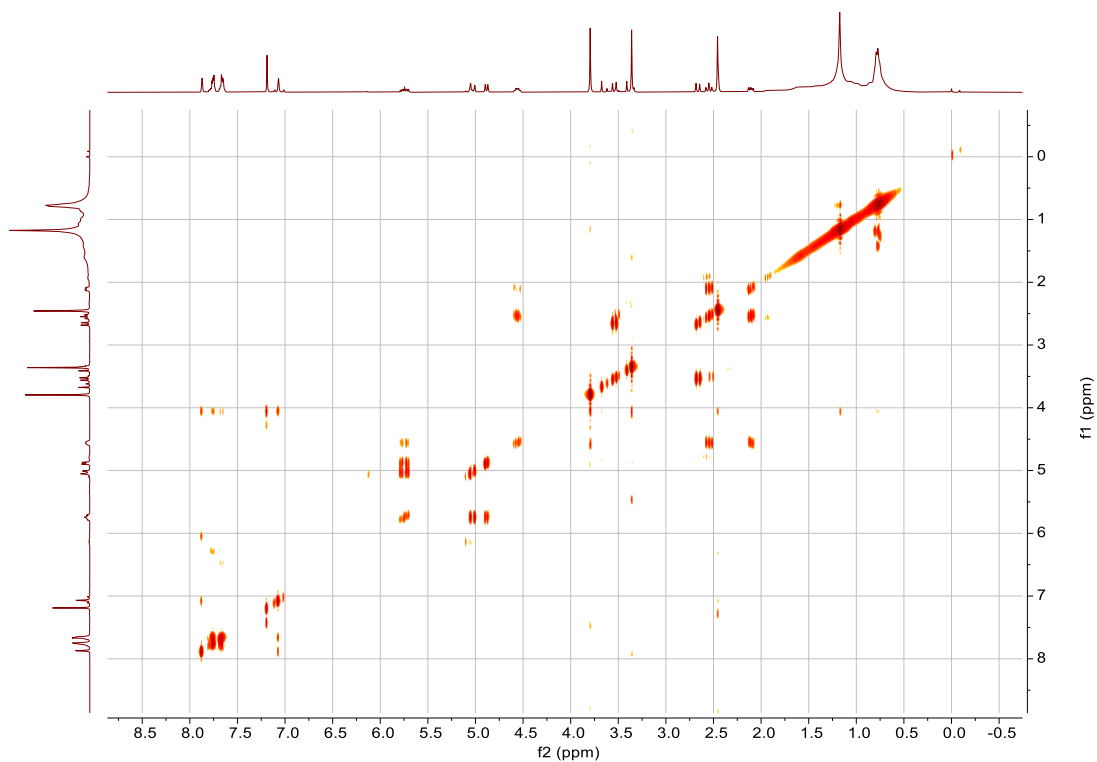

**<sup>13</sup>C NMR (101 MHz, CDCl<sub>3</sub>) of 3n''**

— 181.29

— 171.14

— 168.69

— 140.40

— 135.17

— 134.83

— 134.37

— 134.29

— 131.25

— 124.99

— 123.41

— 121.28

— 117.87

— 115.38

— 77.48

— 77.16

— 76.84

— 71.65

— 53.12

— 51.74

— 48.01

— 43.27

— 42.22

— 29.56

— 18.79

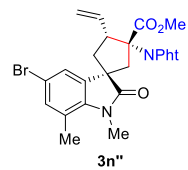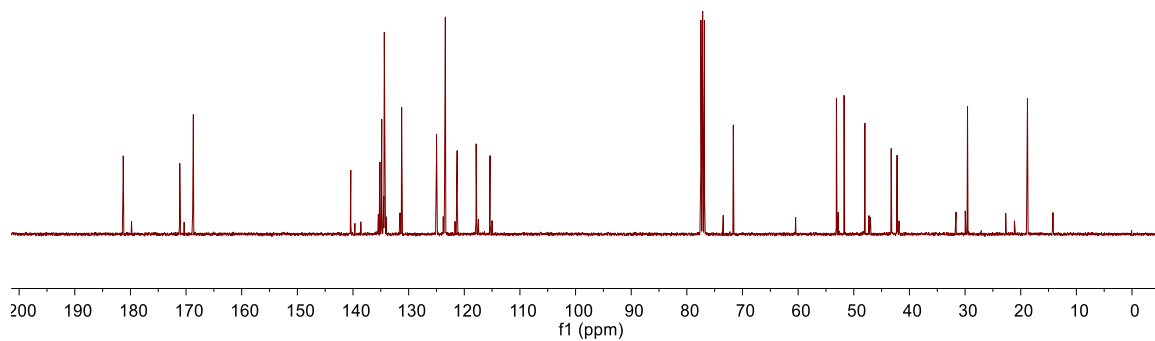

**<sup>1</sup>H NMR (400 MHz, CDCl<sub>3</sub>) of 3o**

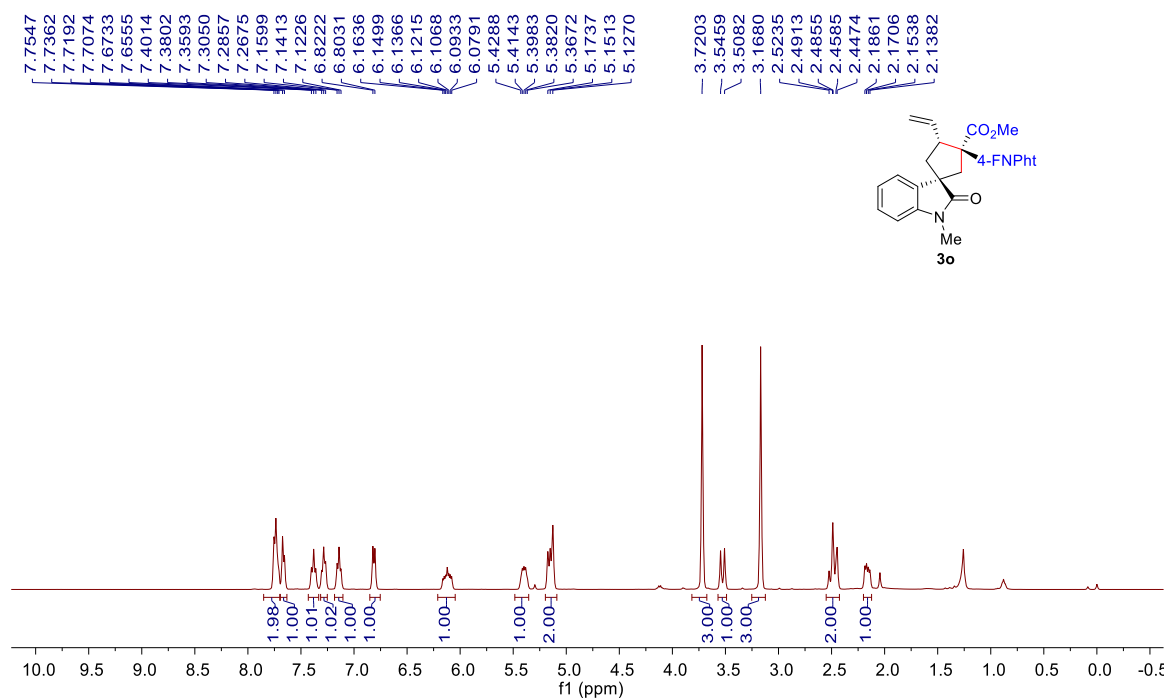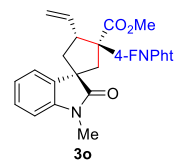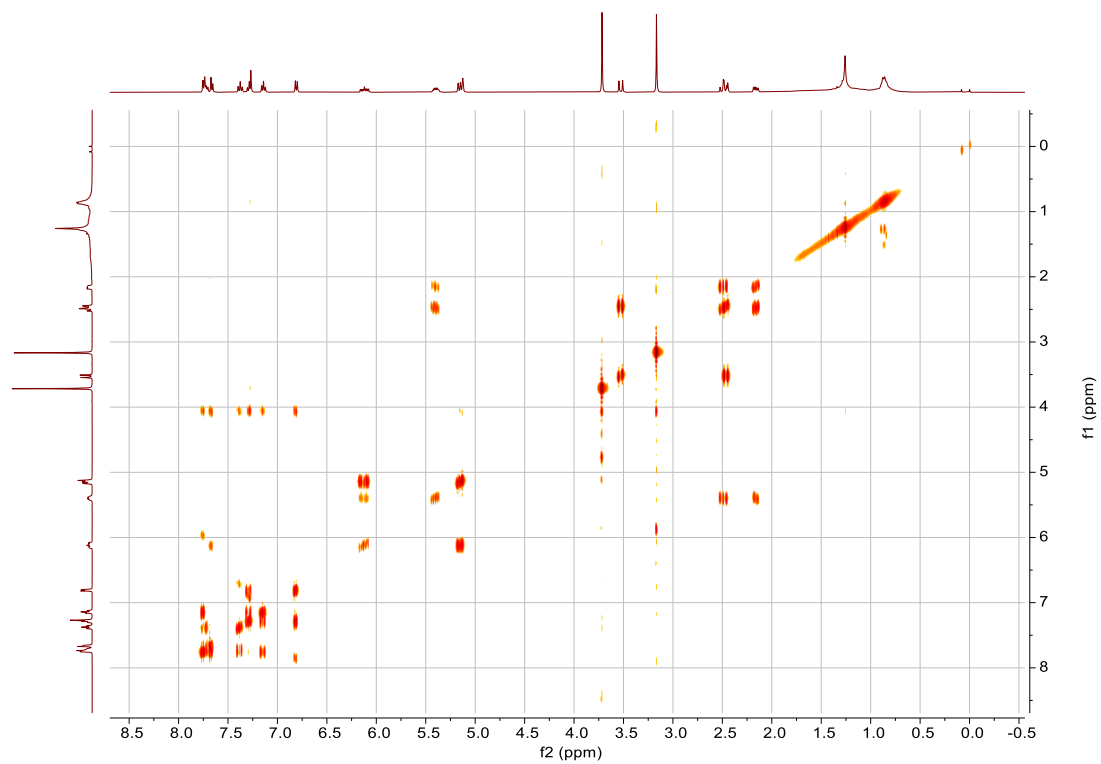

**<sup>13</sup>C NMR (101 MHz, CDCl<sub>3</sub>) of 3o**

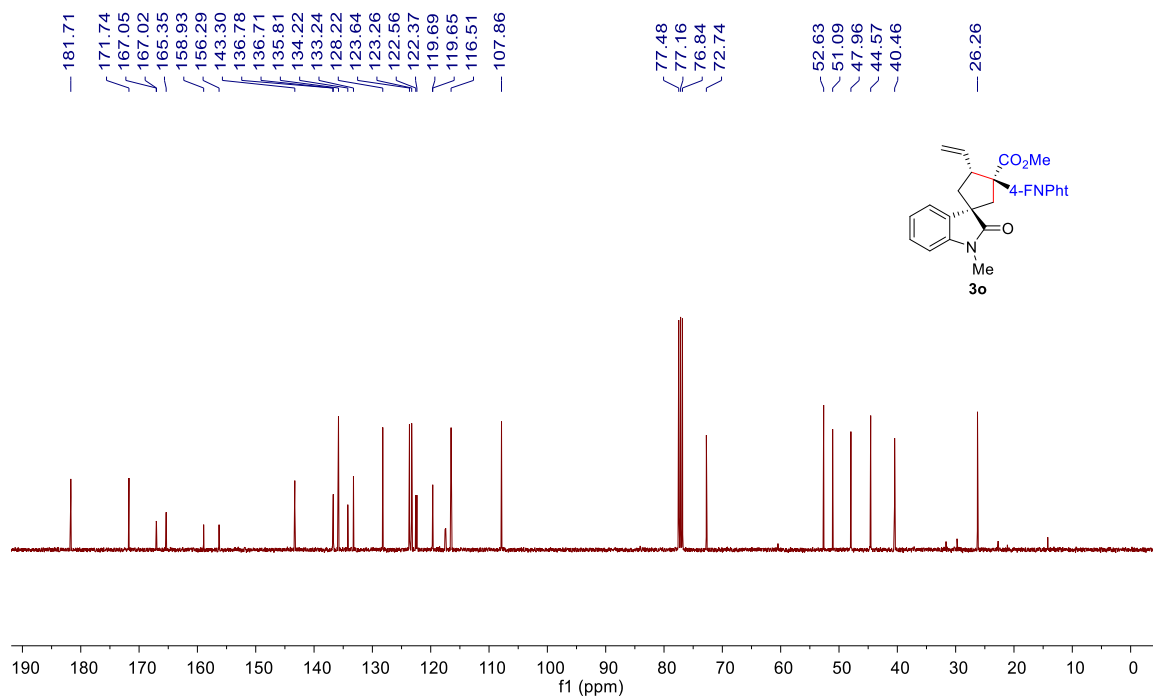

**<sup>1</sup>H NMR (400 MHz, CDCl<sub>3</sub>) of 3o'**

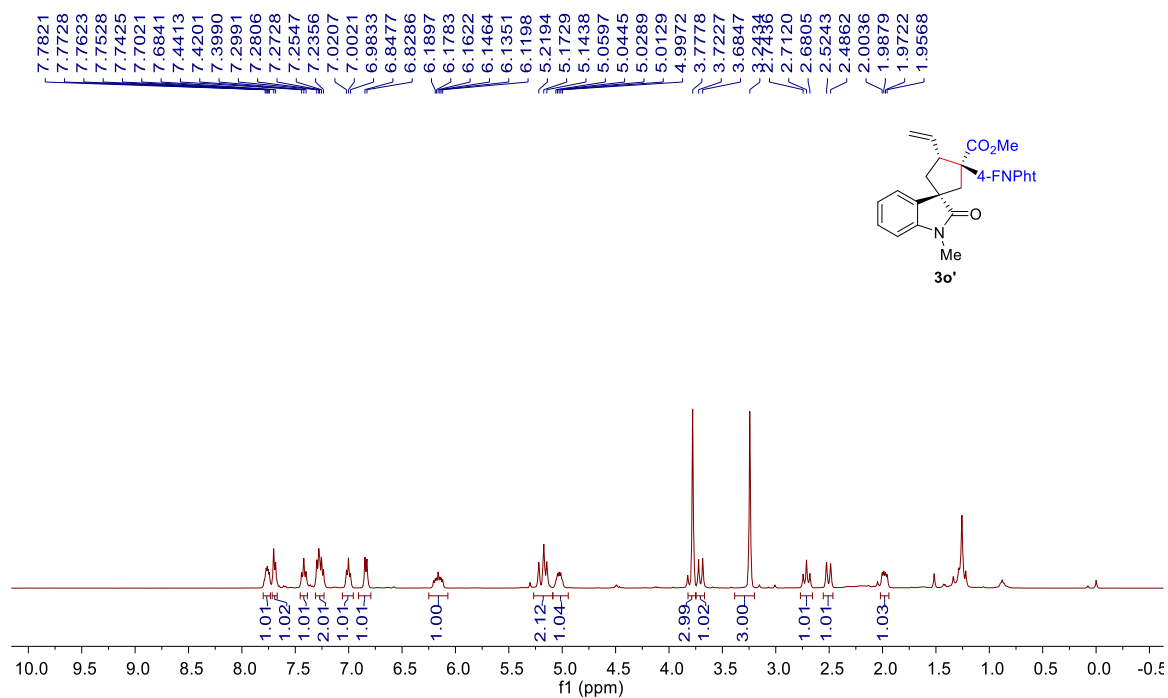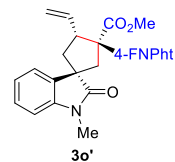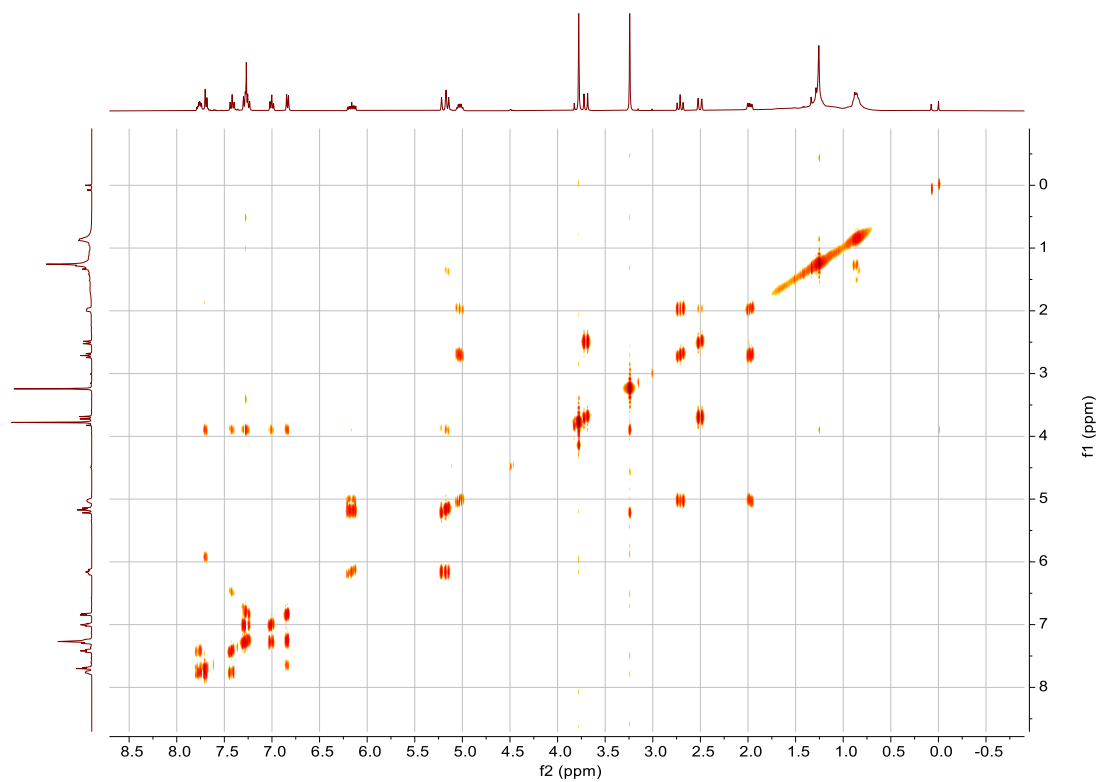

<sup>13</sup>C NMR (101 MHz, CDCl<sub>3</sub>) of 3o'

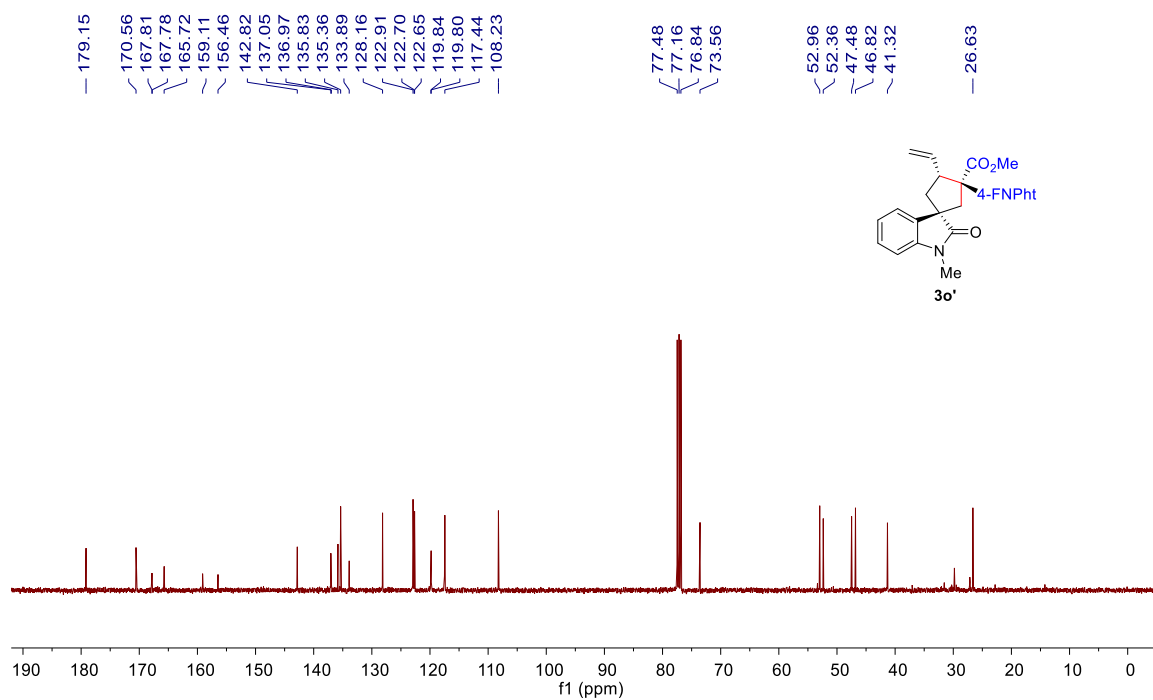



<sup>13</sup>C NMR (101 MHz, CDCl<sub>3</sub>) of 3o''

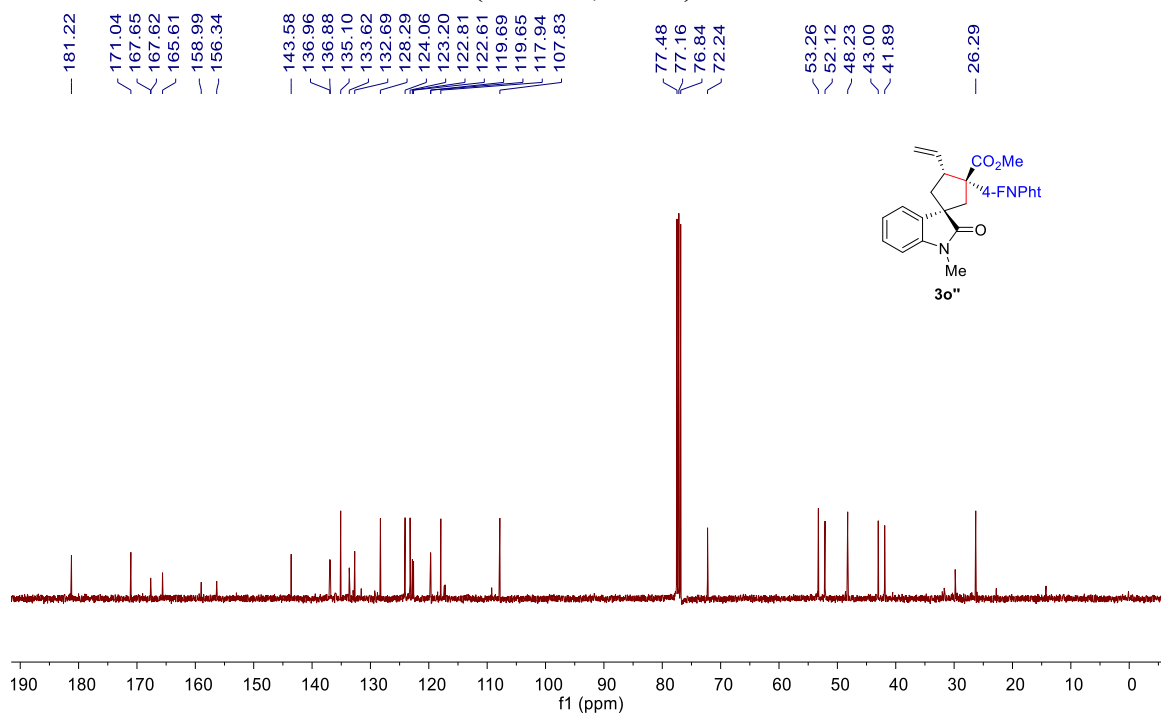

<sup>1</sup>H NMR (400 MHz, CDCl<sub>3</sub>) of 3p

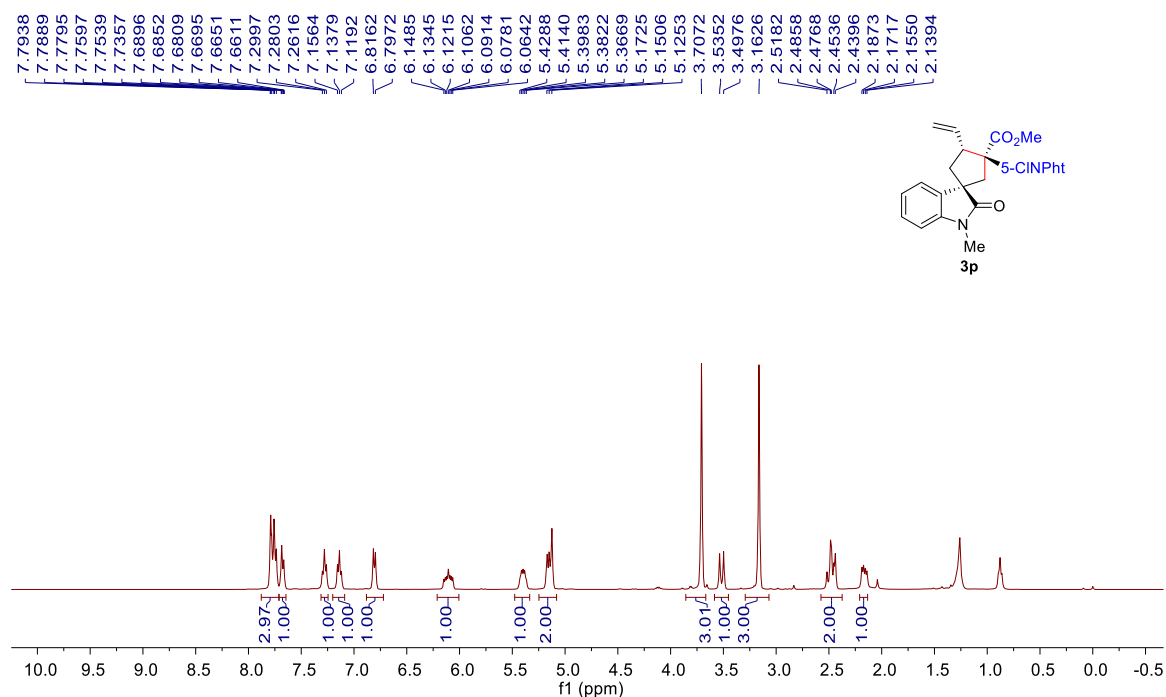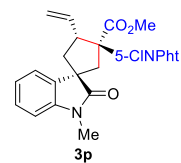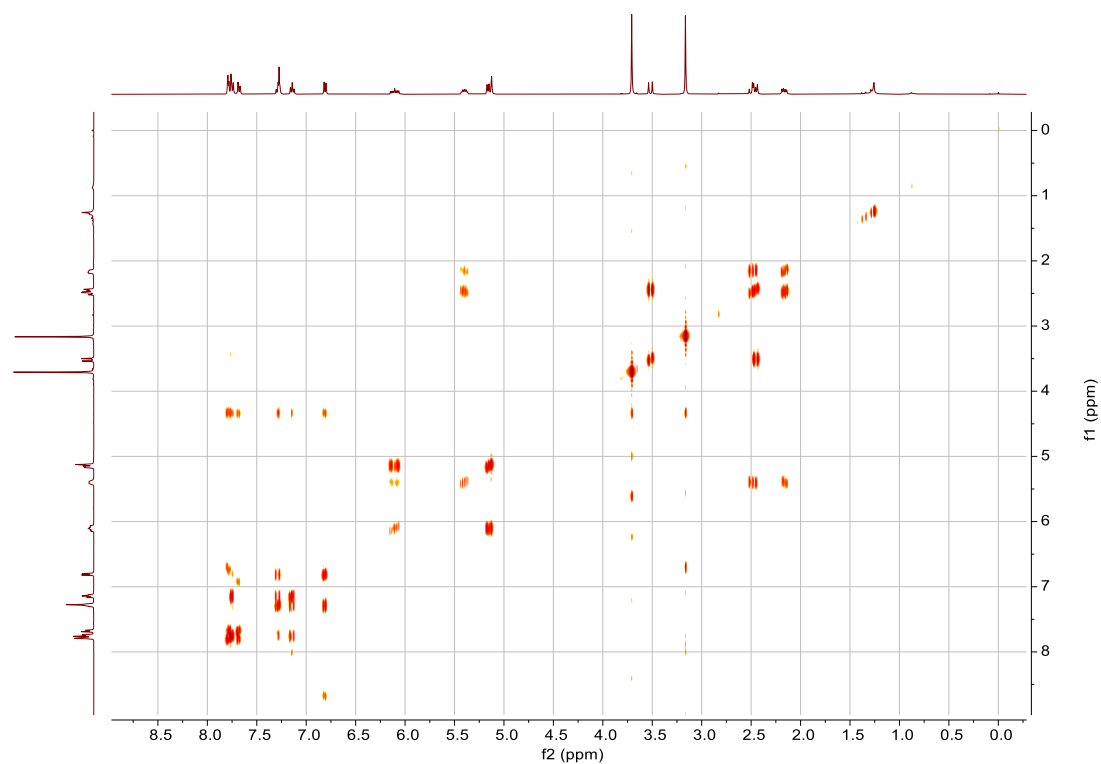

**<sup>13</sup>C NMR (101 MHz, CDCl<sub>3</sub>) of 3p**

- 181.67
- ~ 171.74
- ~ 167.45
- ~ 167.09
- 143.29
- 140.81
- 135.78
- 134.23
- 133.47
- 133.23
- 129.90
- 128.21
- 124.67
- 123.77
- 123.63
- 123.24
- 116.50
- 107.84
- 77.48
- 77.16
- 76.84
- 72.75
- ~ 52.57
- ~ 51.09
- ~ 47.92
- ~ 44.61
- ~ 40.46
- 26.24

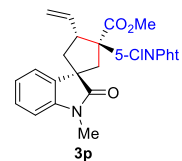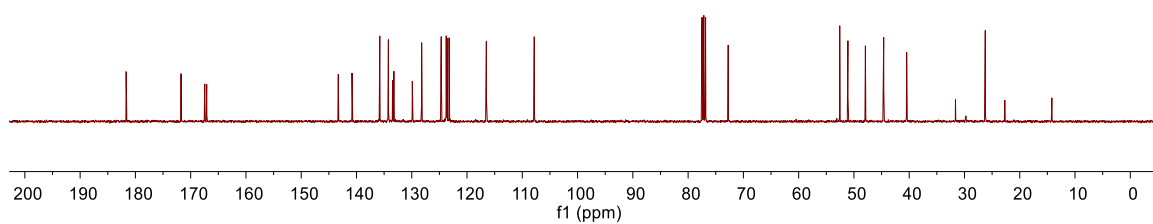

<sup>1</sup>H NMR (400 MHz, CDCl<sub>3</sub>) of 3p'

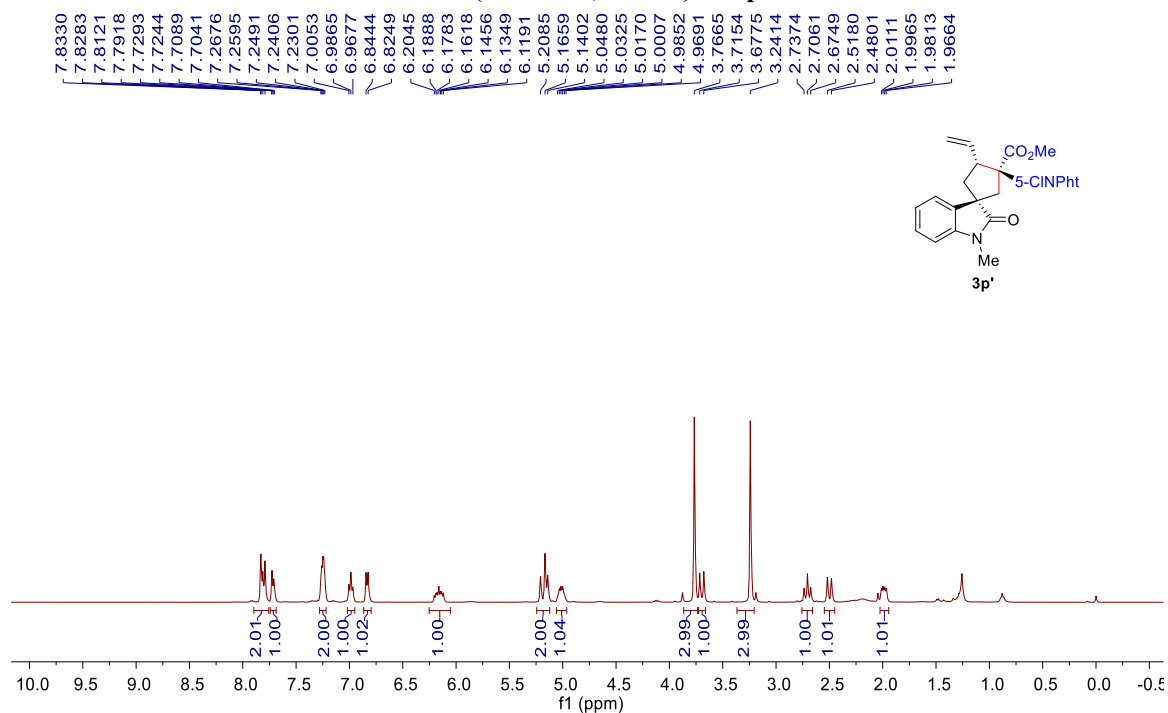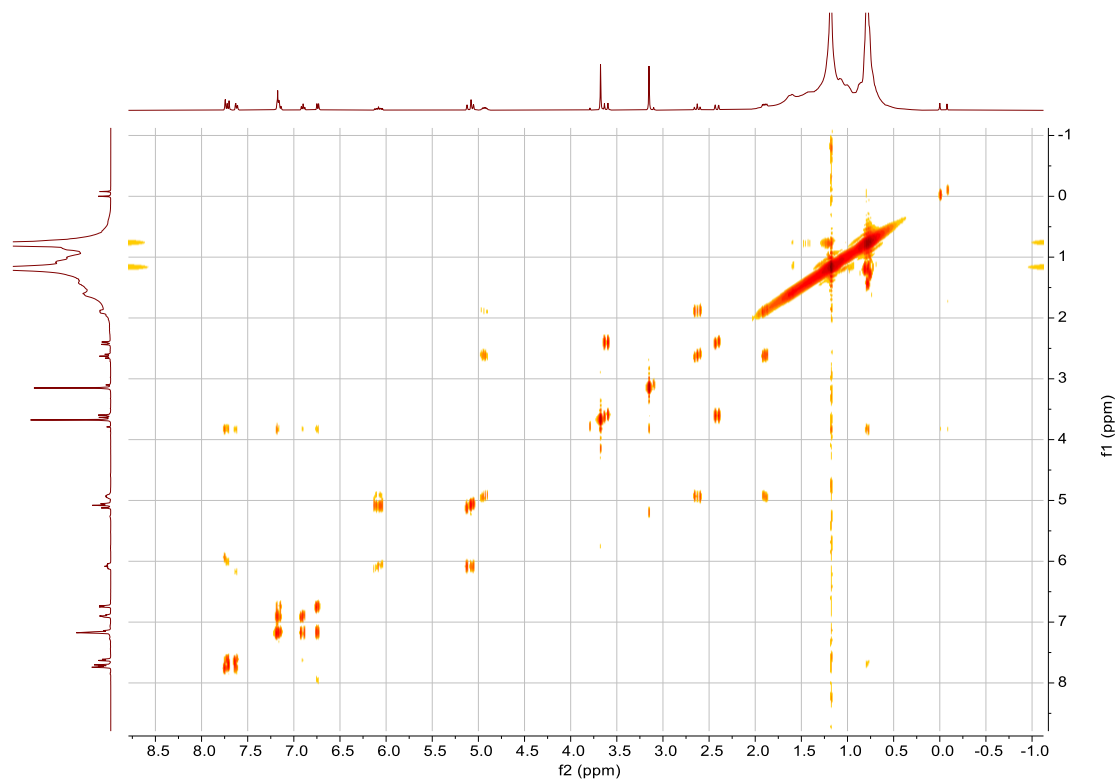

**$^{13}\text{C}$  NMR (101 MHz,  $\text{CDCl}_3$ ) of **3p'****

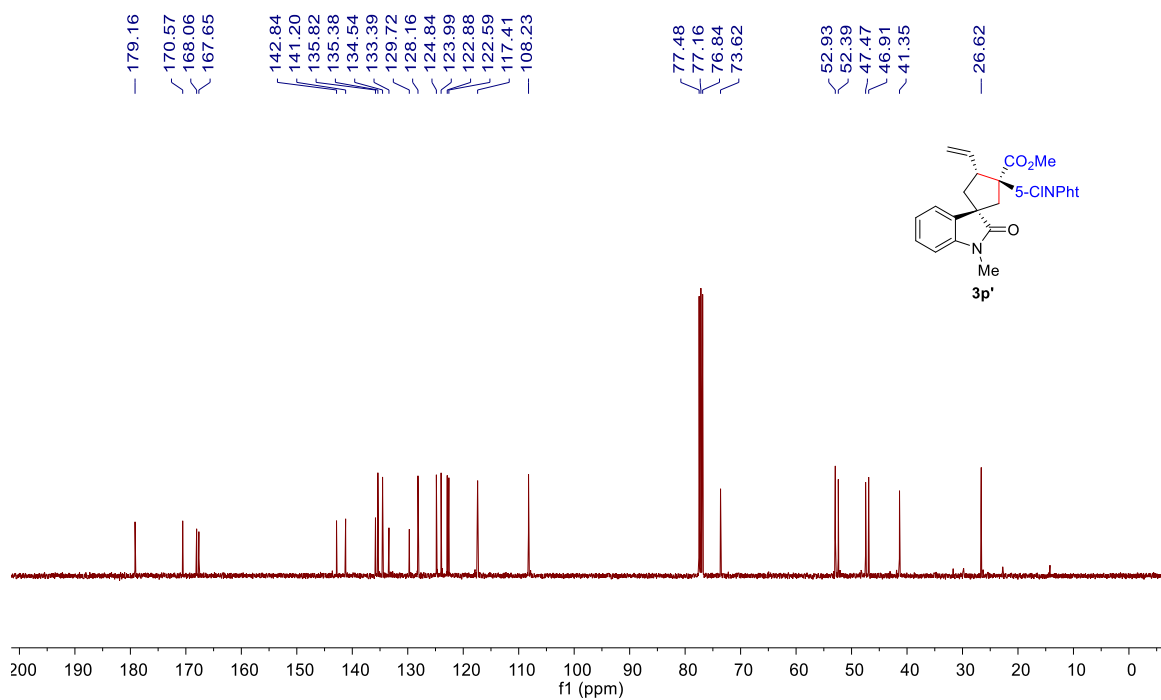

**<sup>1</sup>H NMR (400 MHz, CDCl<sub>3</sub>) of 3p''**

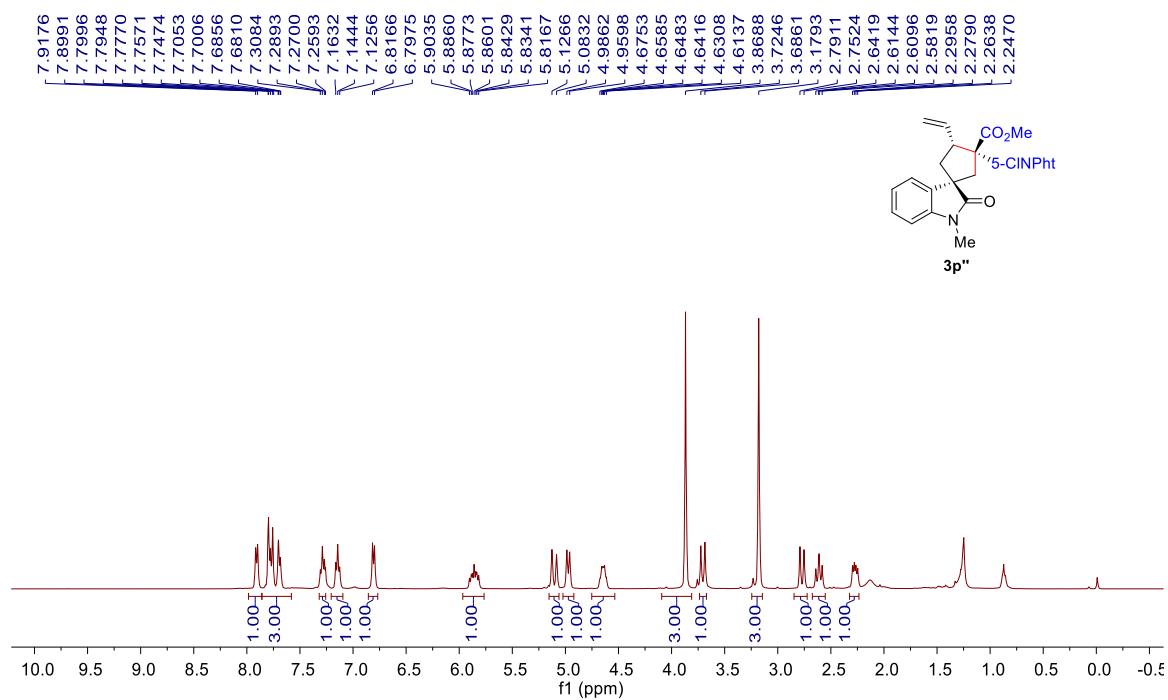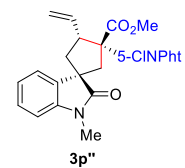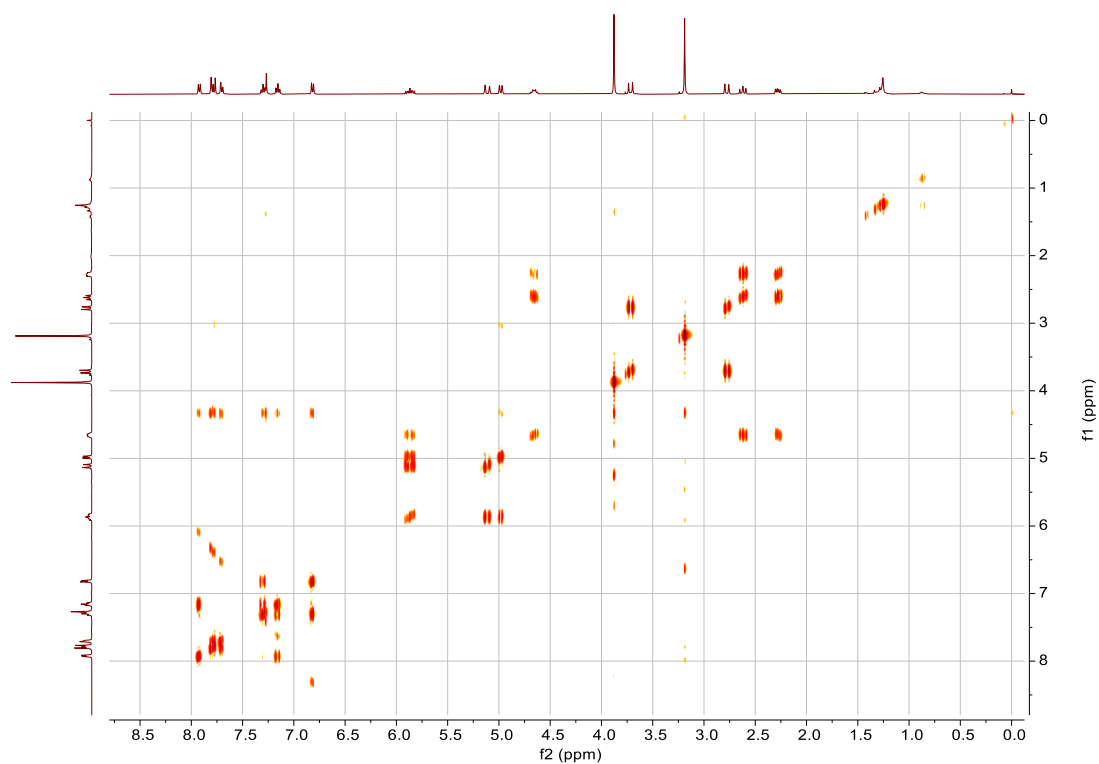

<sup>13</sup>C NMR (101 MHz, CDCl<sub>3</sub>) of 3p''

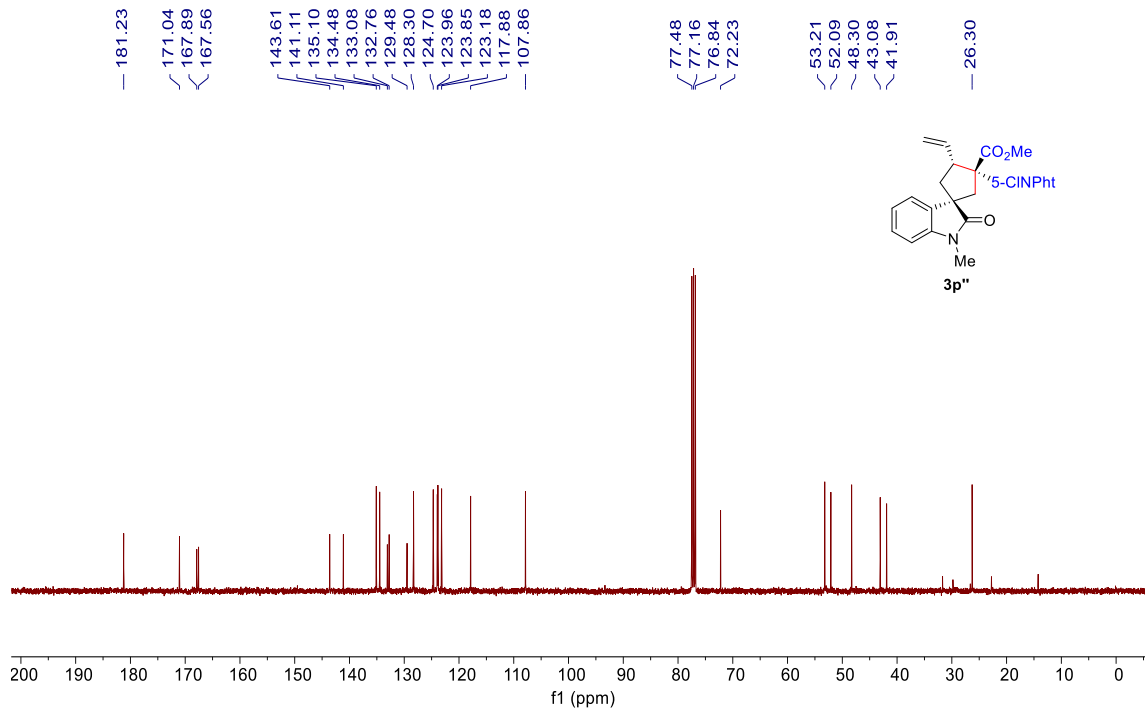

### <sup>1</sup>H NMR (400 MHz, CDCl<sub>3</sub>) of 3q

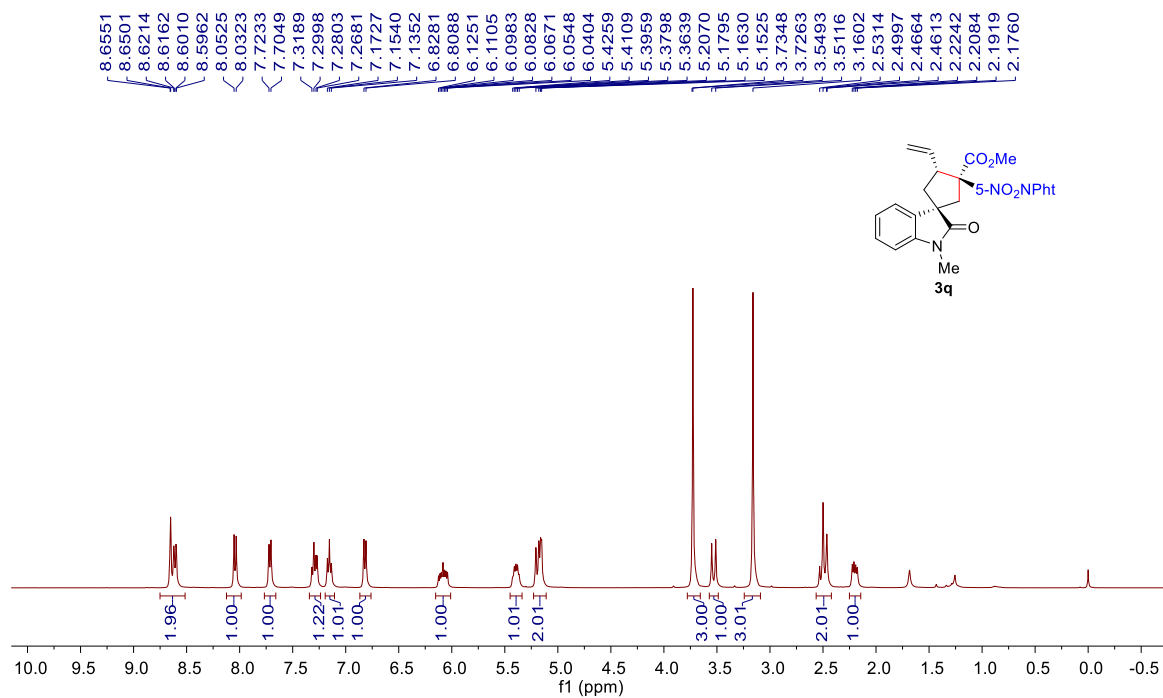

### <sup>13</sup>C NMR (101 MHz, CDCl<sub>3</sub>) of 3q

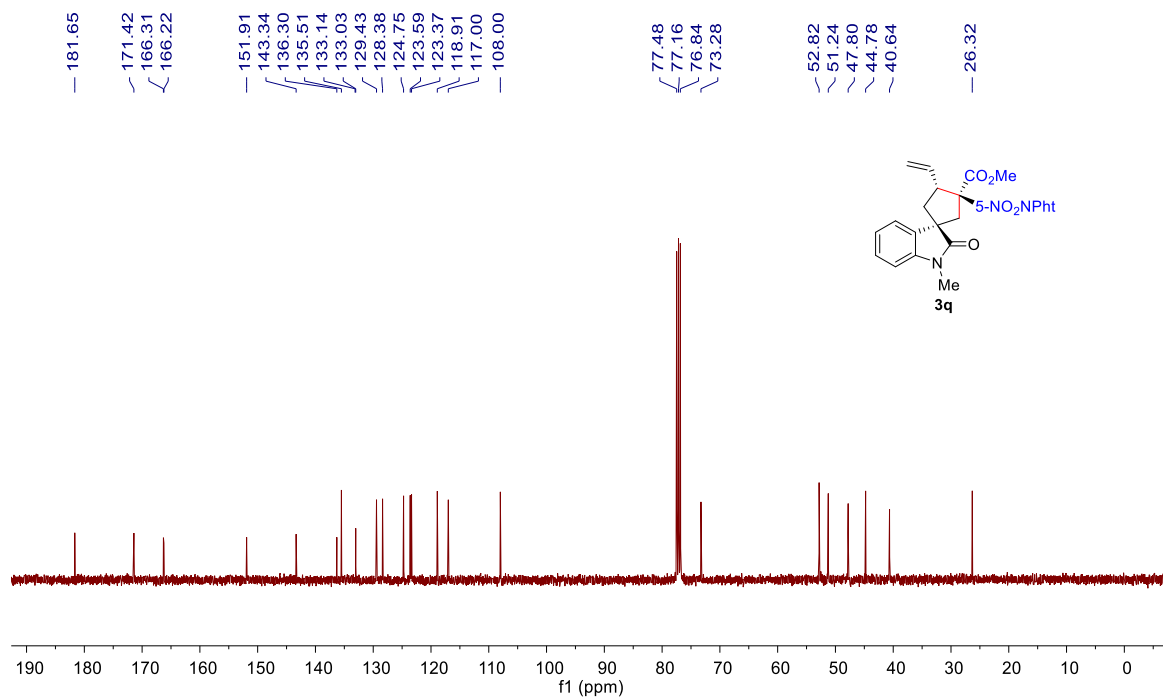

### <sup>1</sup>H NMR (400 MHz, CDCl<sub>3</sub>) of 3q'

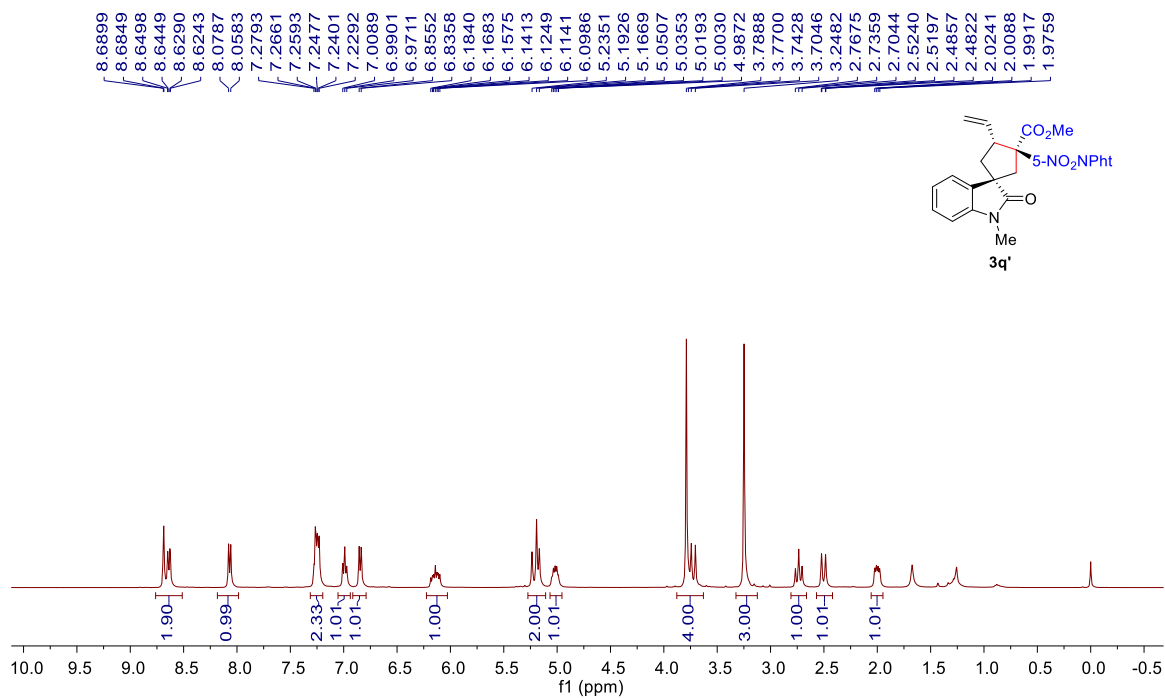

### <sup>13</sup>C NMR (101 MHz, CDCl<sub>3</sub>) of 3q'

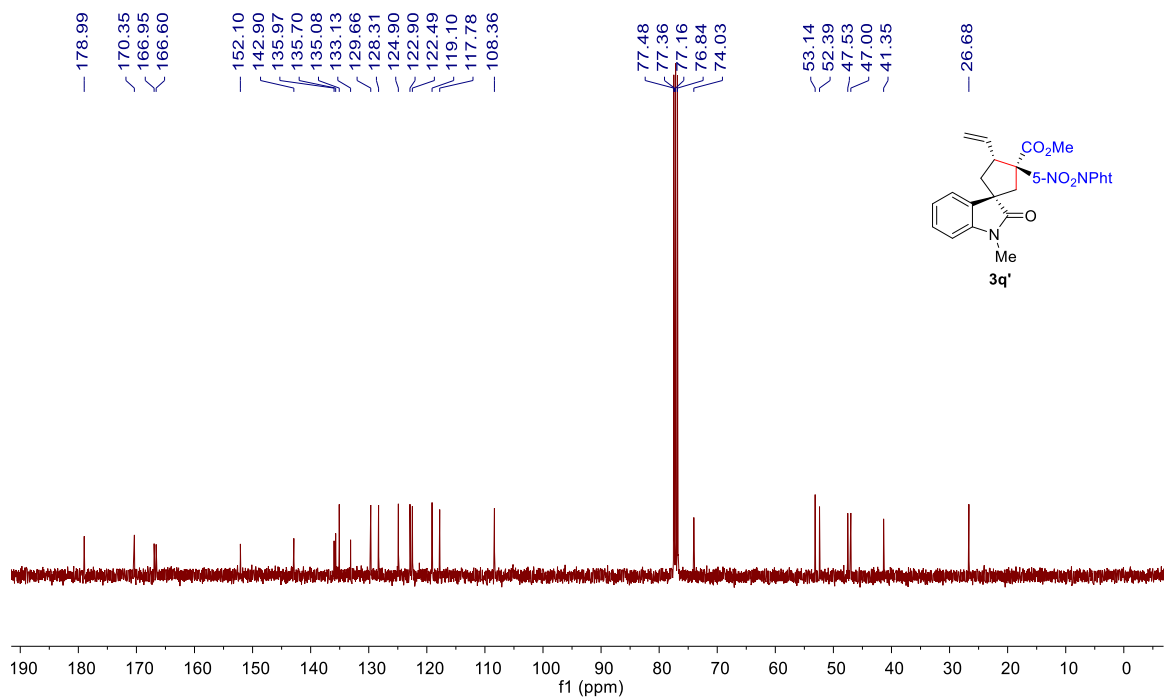

**<sup>1</sup>H NMR (400 MHz, CDCl<sub>3</sub>) of 3q''**

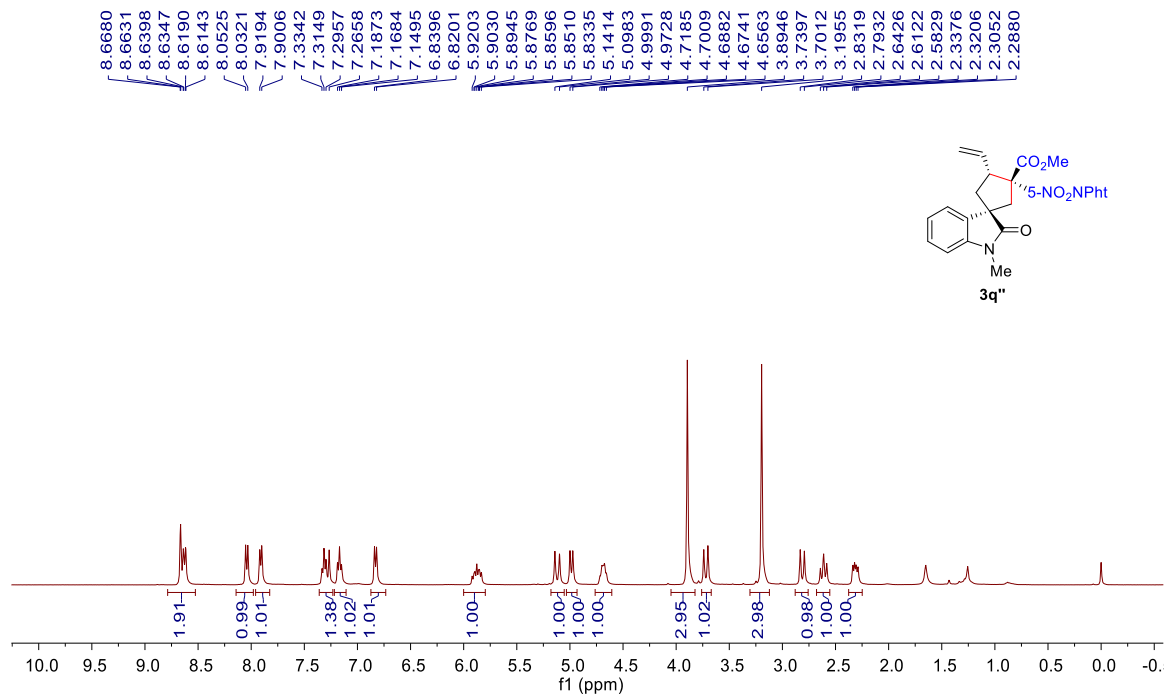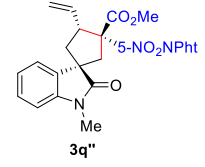

**<sup>13</sup>C NMR (101 MHz, CDCl<sub>3</sub>) of 3q''**

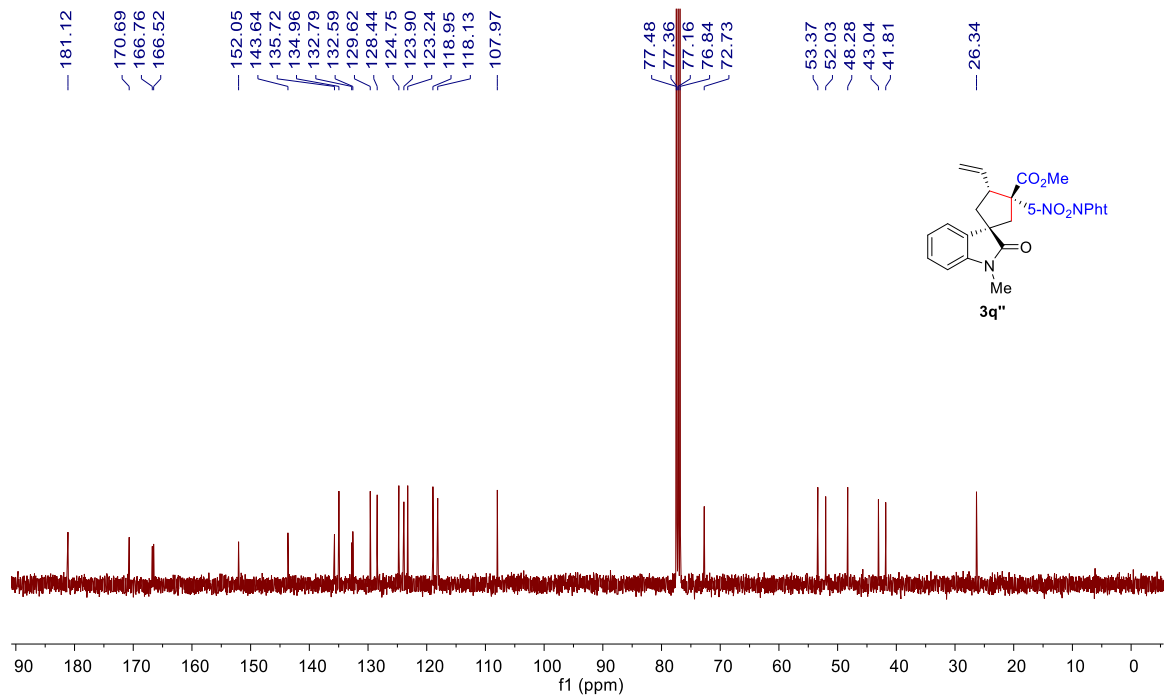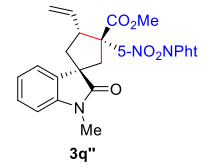

<sup>1</sup>H NMR (400 MHz, CDCl<sub>3</sub>) of 3r

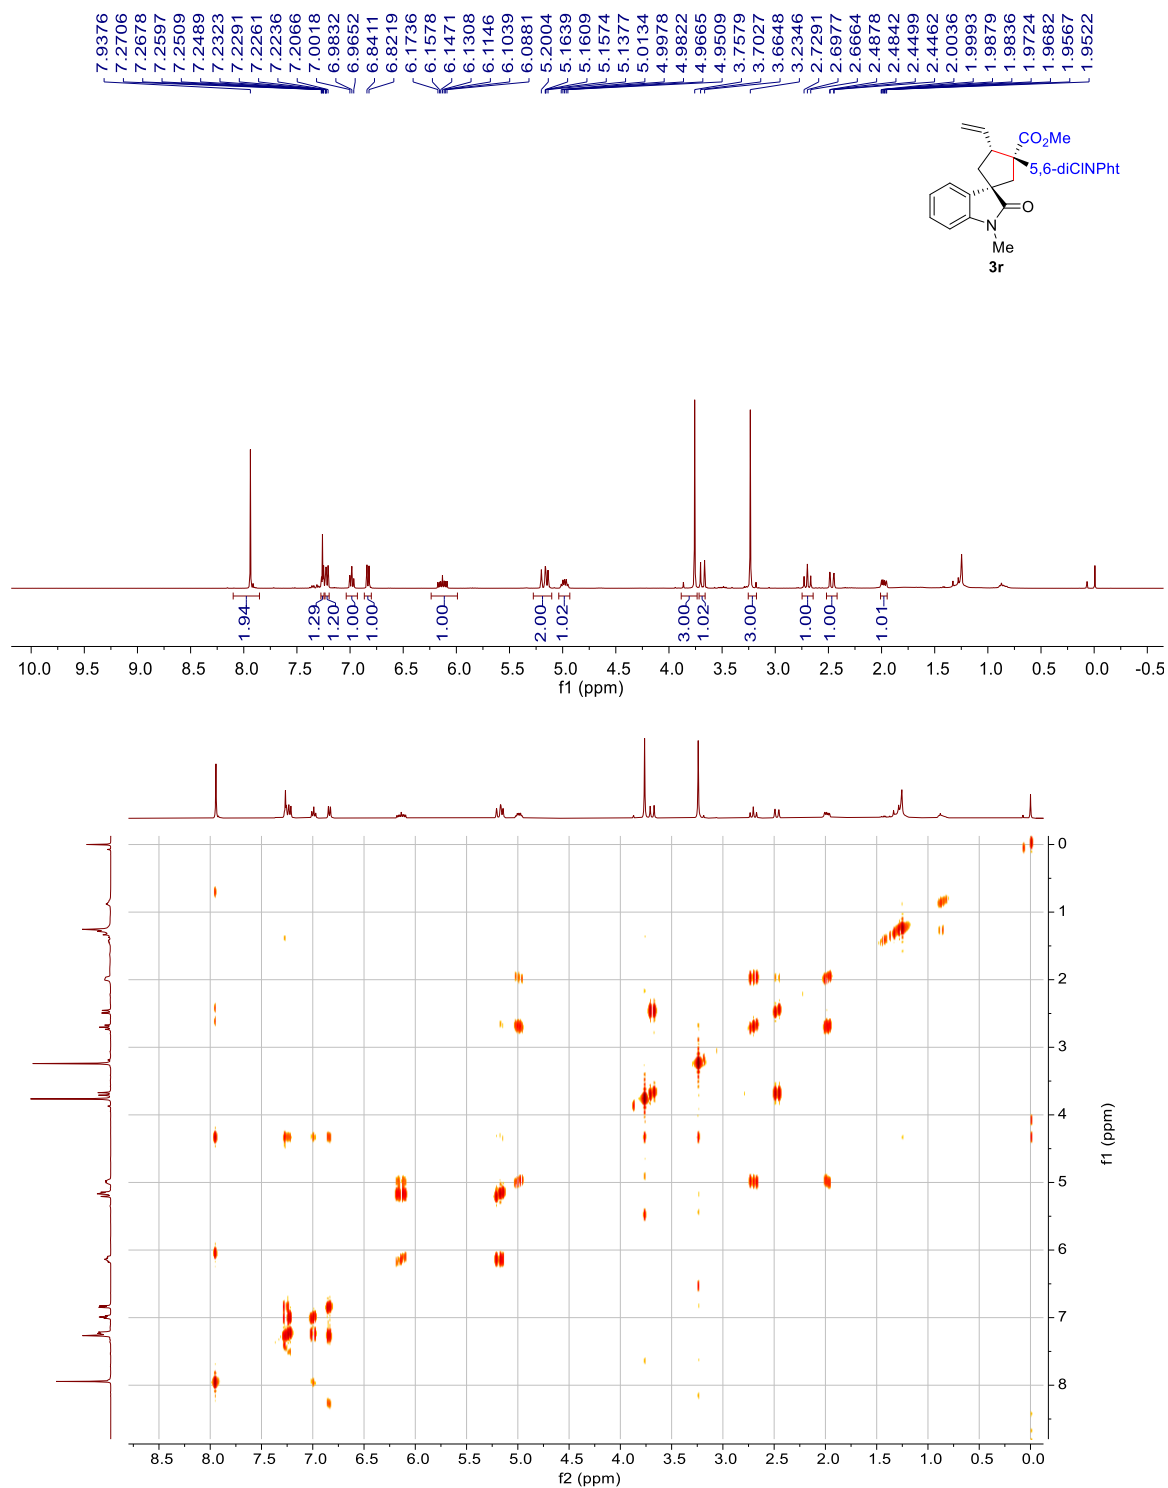

**<sup>13</sup>C NMR (101 MHz, CDCl<sub>3</sub>) of 3r**

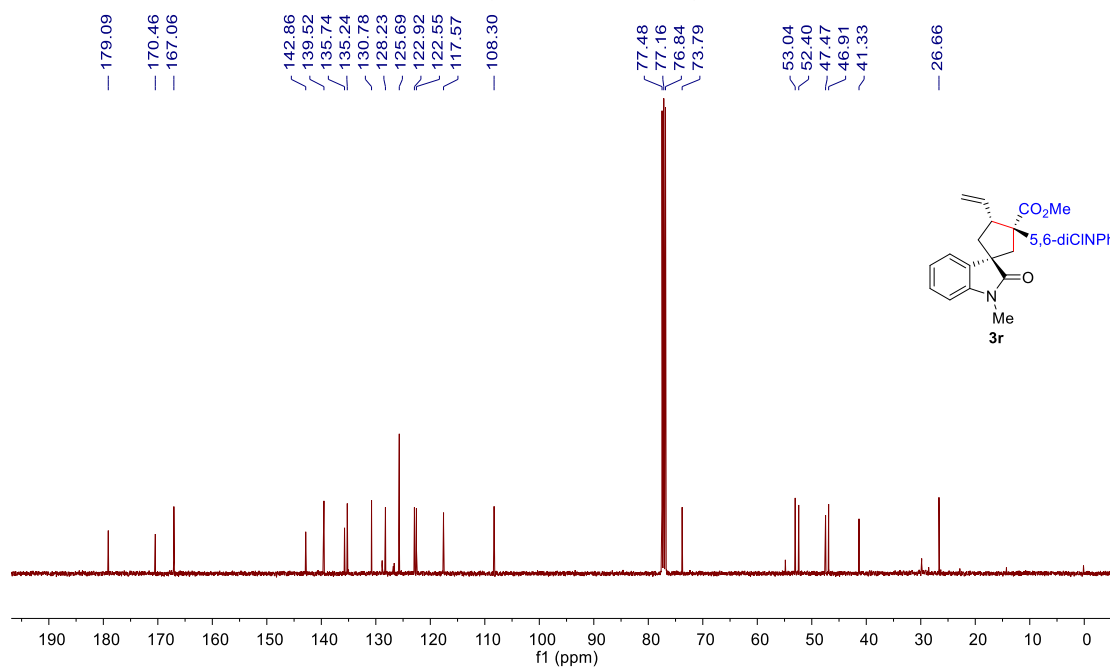

<sup>1</sup>H NMR (400 MHz, CDCl<sub>3</sub>) of 3r'

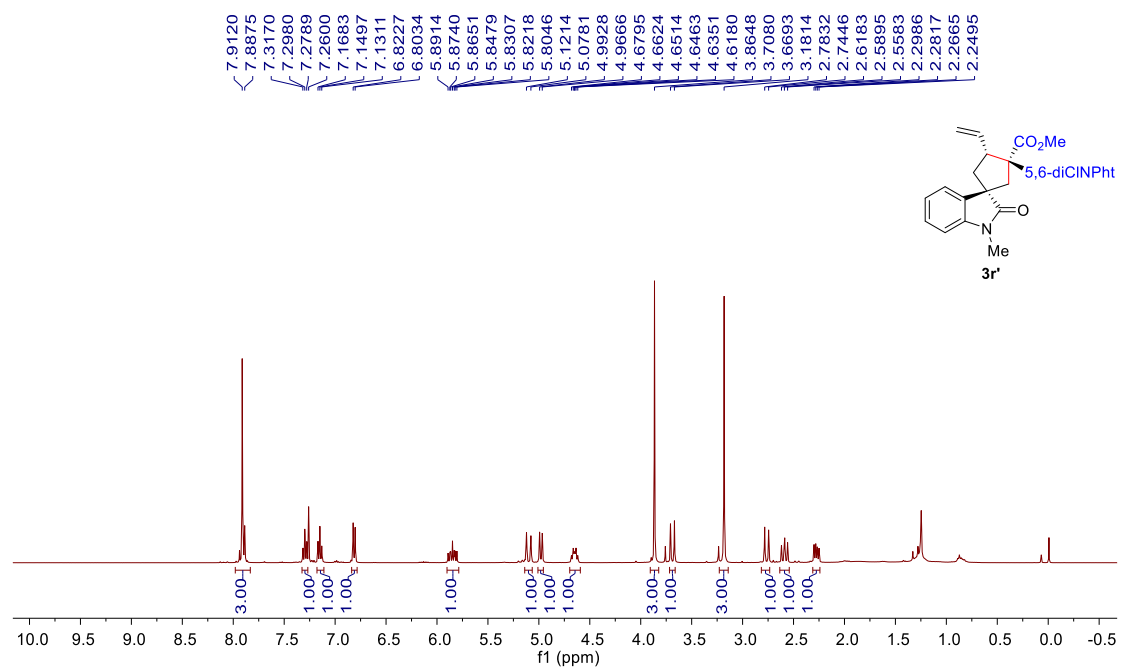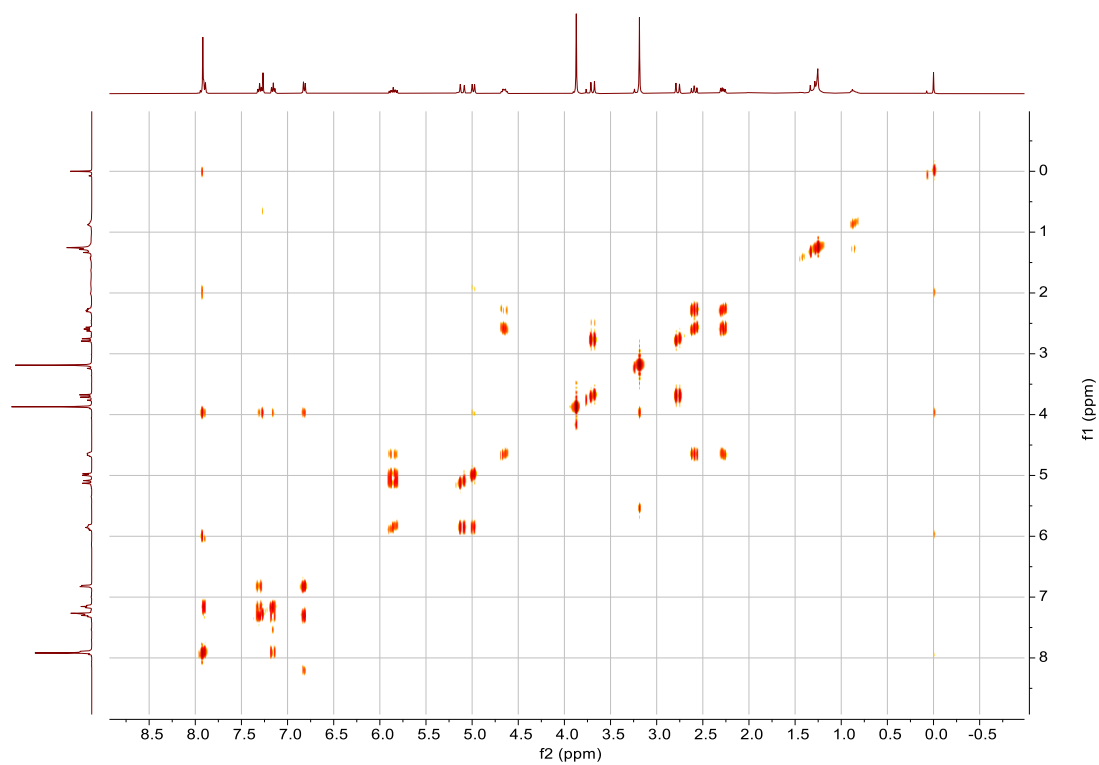

<sup>13</sup>C NMR (101 MHz, CDCl<sub>3</sub>) of 3r'

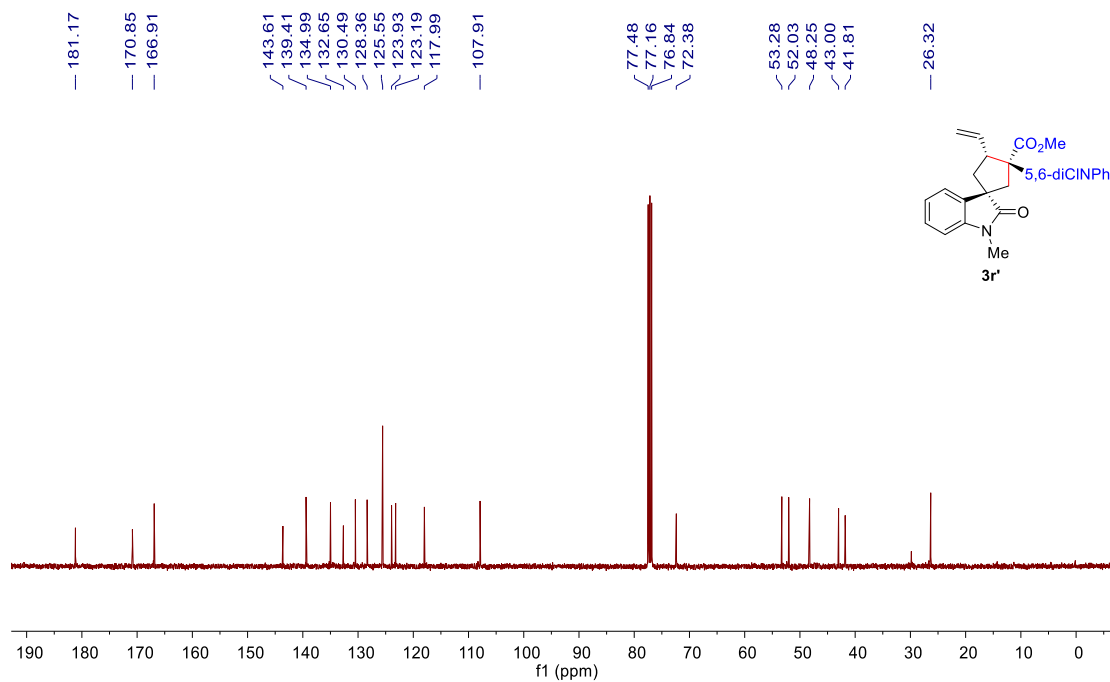

**<sup>1</sup>H NMR (400 MHz, CDCl<sub>3</sub>) of 3r''**

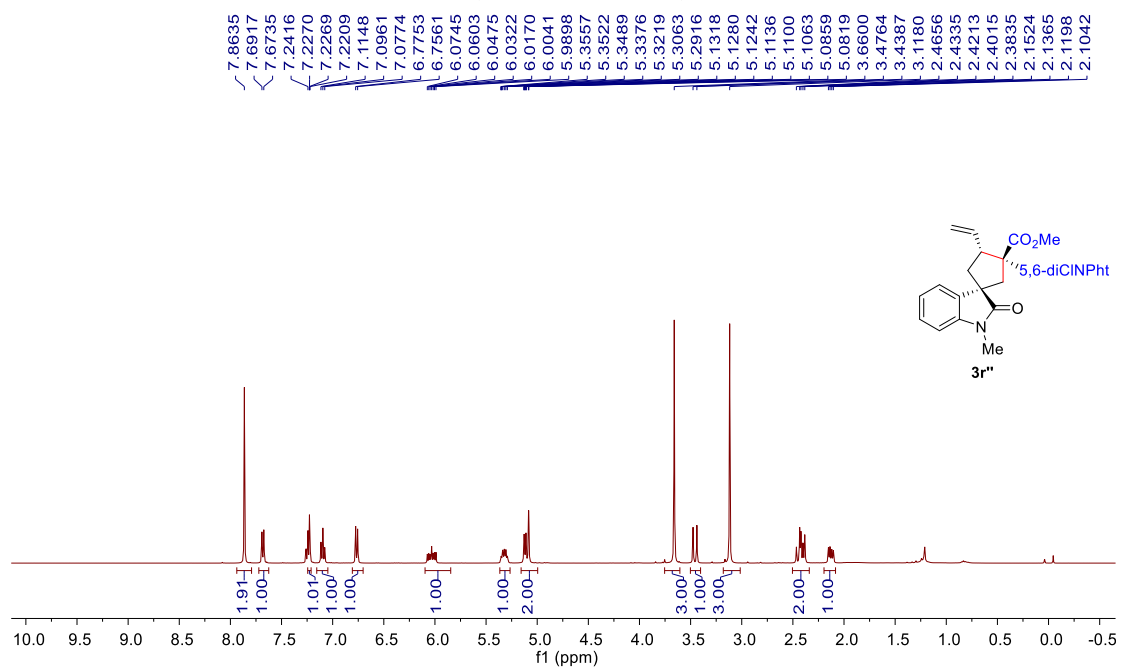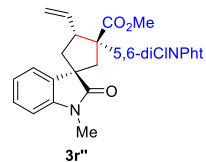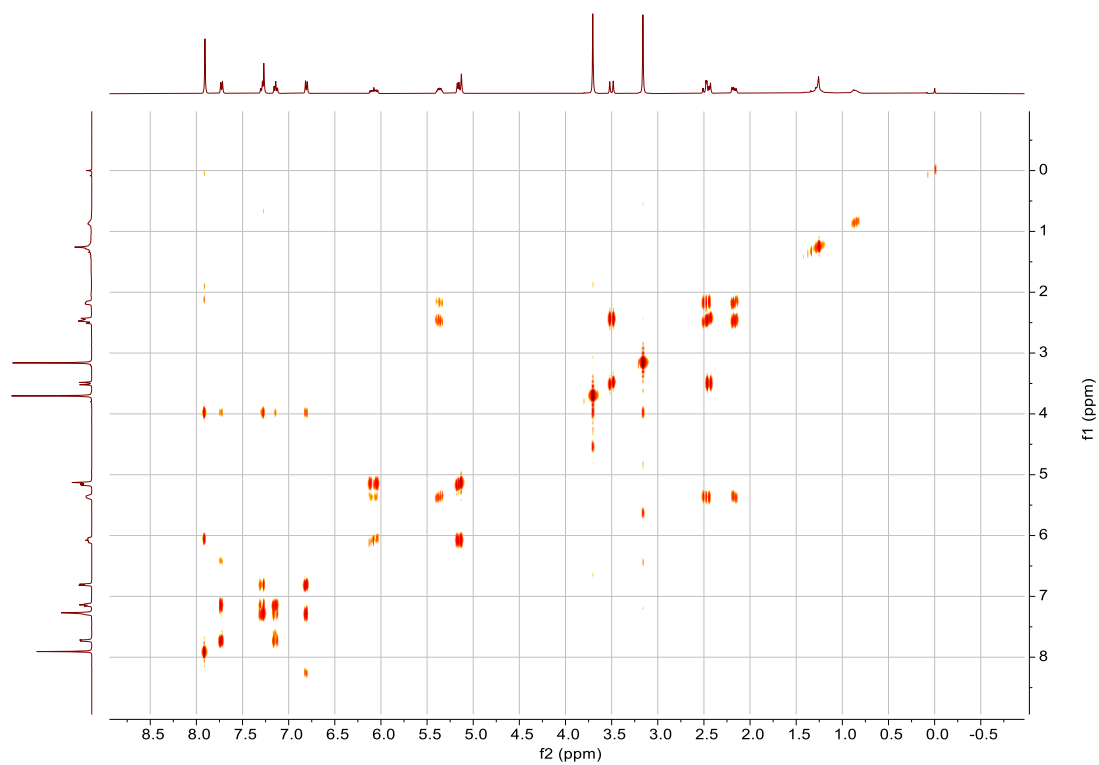

**<sup>13</sup>C NMR (101 MHz, CDCl<sub>3</sub>) of 3r''**

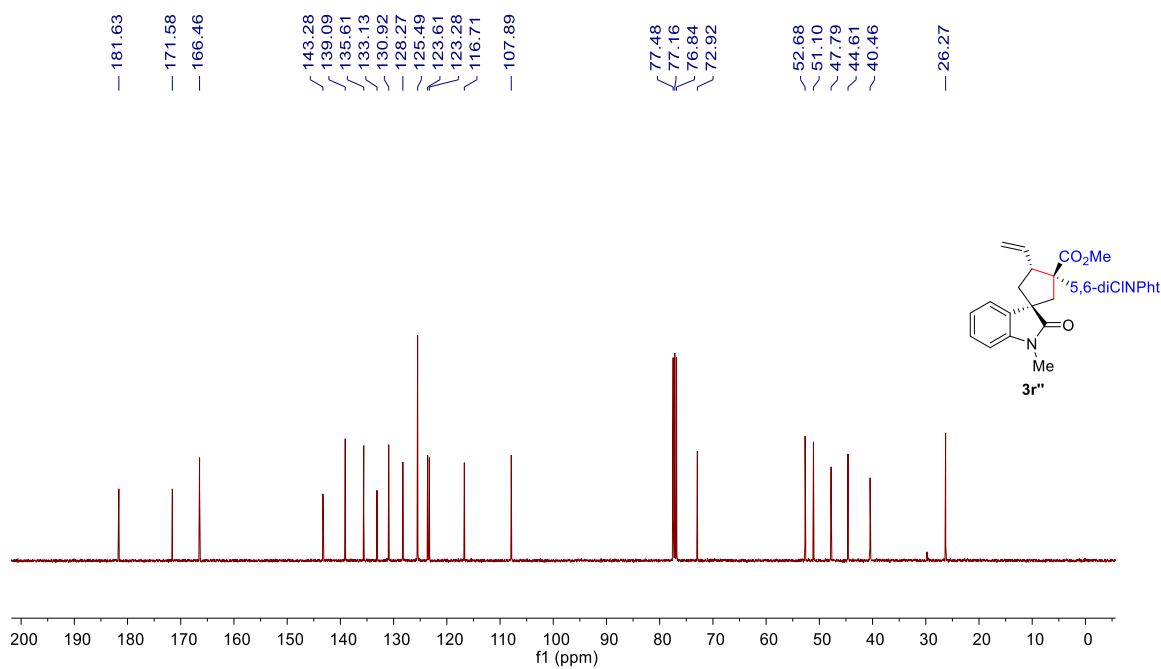

### <sup>1</sup>H NMR (400 MHz, CDCl<sub>3</sub>) of 3s

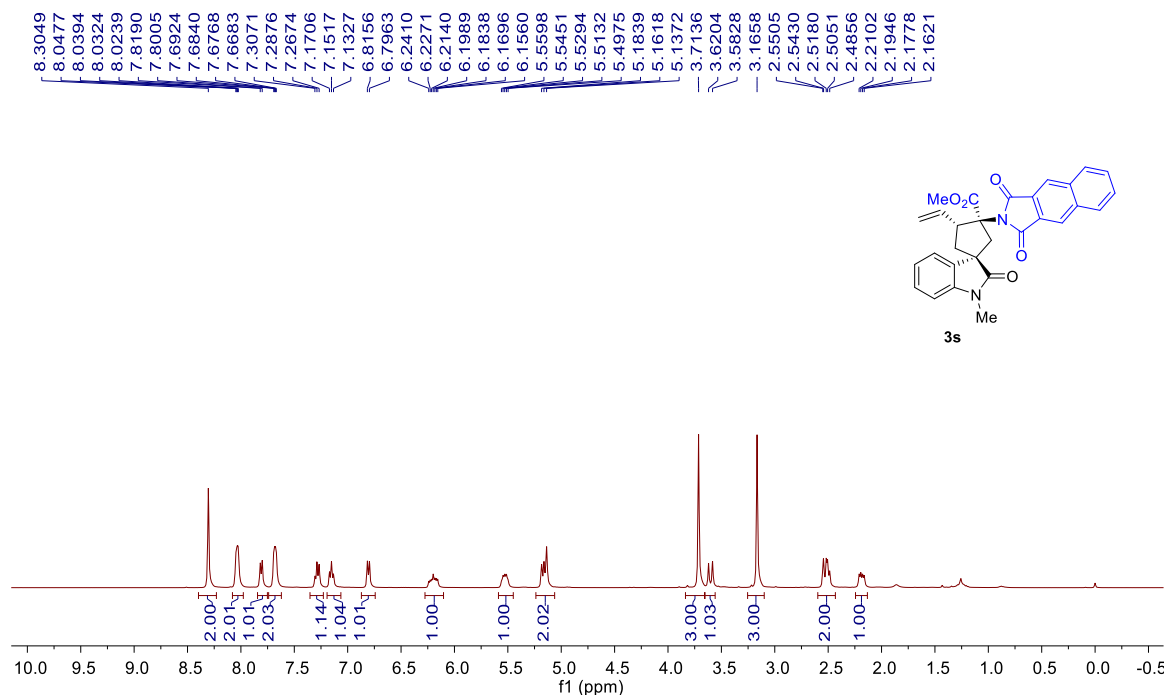

### <sup>13</sup>C NMR (101 MHz, CDCl<sub>3</sub>) of 3s

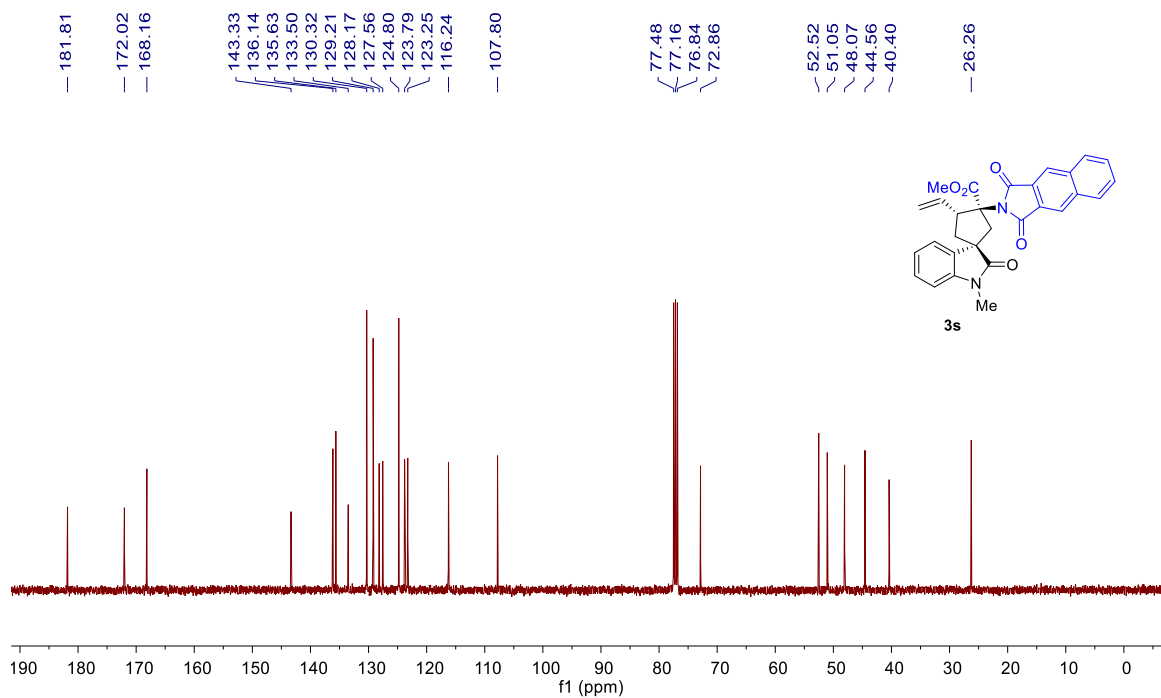

**<sup>1</sup>H NMR (400 MHz, CDCl<sub>3</sub>) of 3s'**

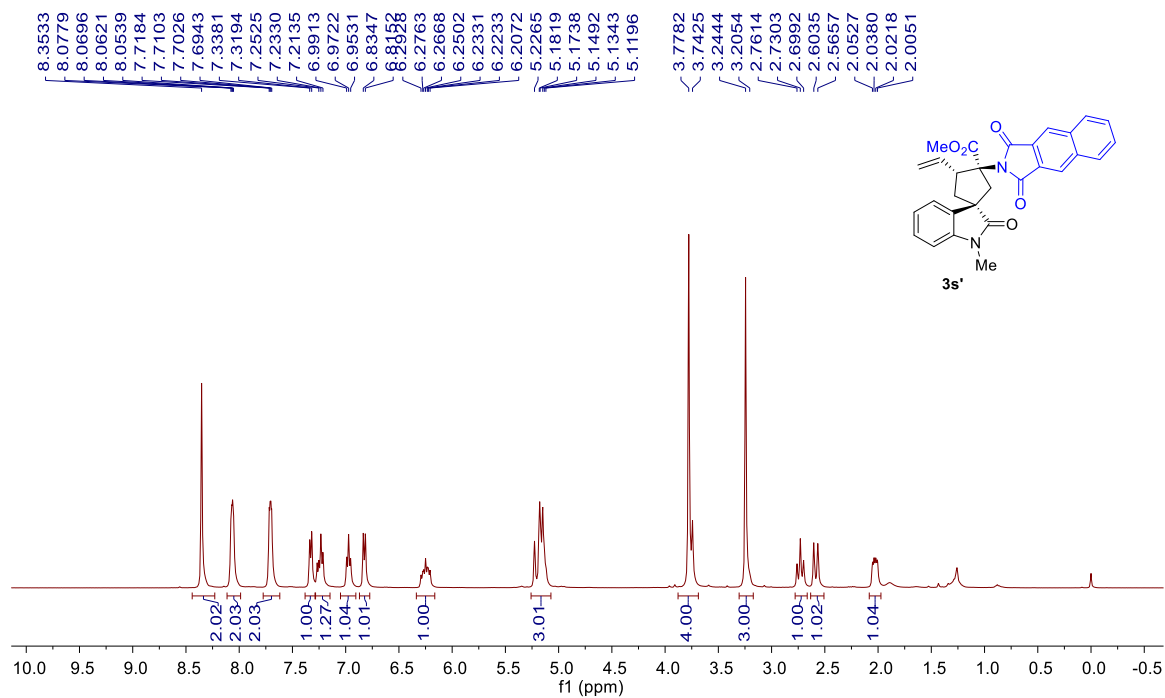

**<sup>13</sup>C NMR (101 MHz, CDCl<sub>3</sub>) of 3s'**

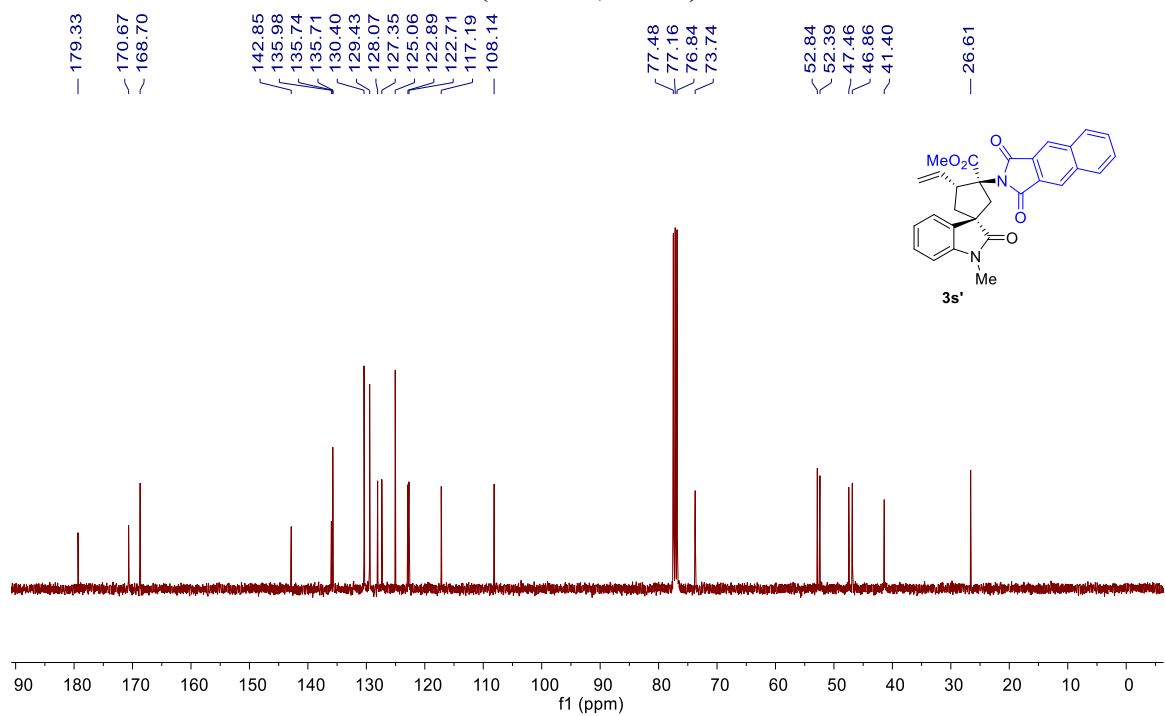

**<sup>1</sup>H NMR (400 MHz, CDCl<sub>3</sub>) of 3s''**

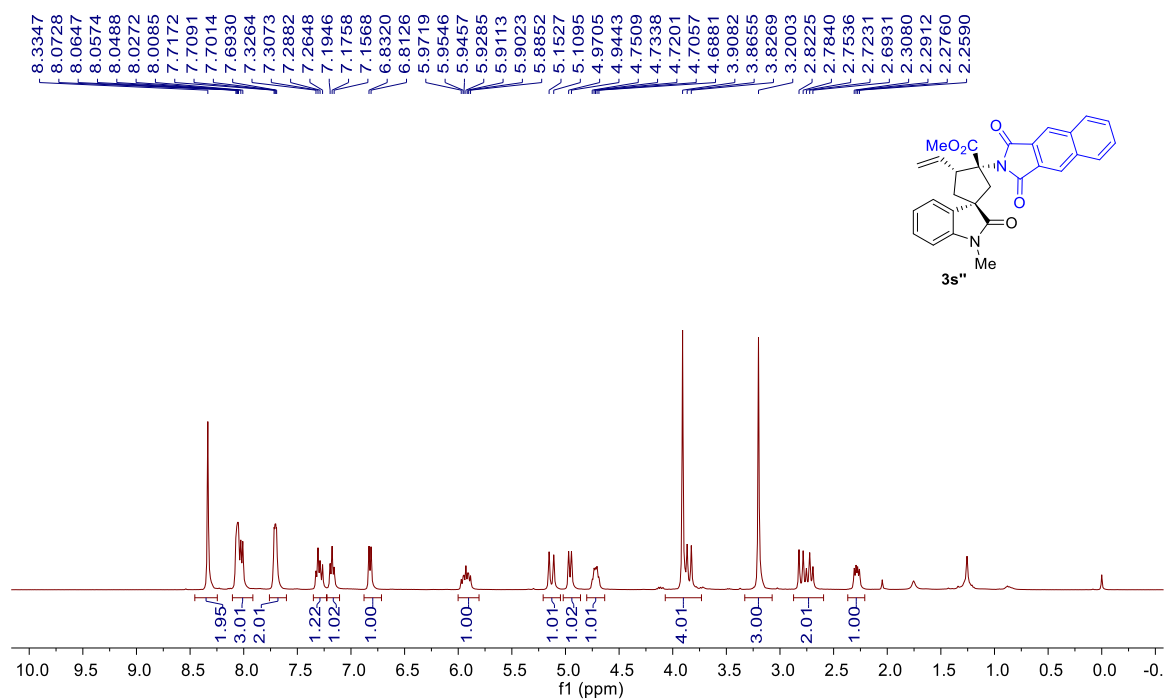

**<sup>13</sup>C NMR (101 MHz, CDCl<sub>3</sub>) of 3s''**

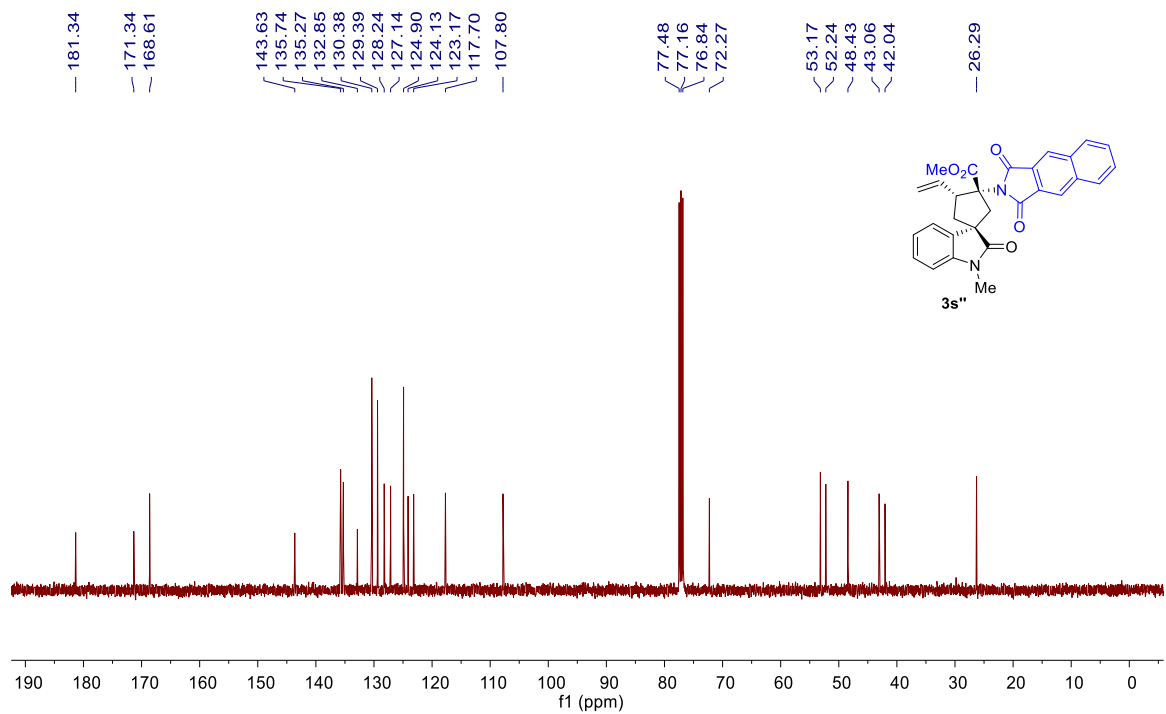

**<sup>1</sup>H NMR (400 MHz, CDCl<sub>3</sub>) of 3t**

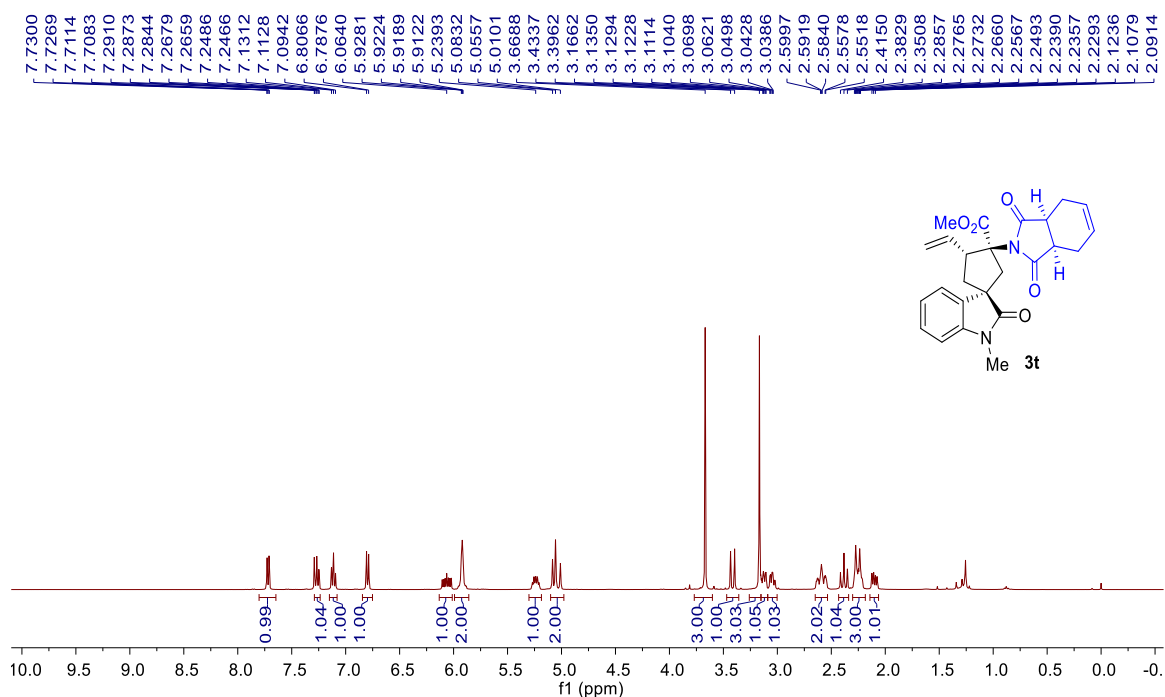

**<sup>13</sup>C NMR (101 MHz, CDCl<sub>3</sub>) of 3t**

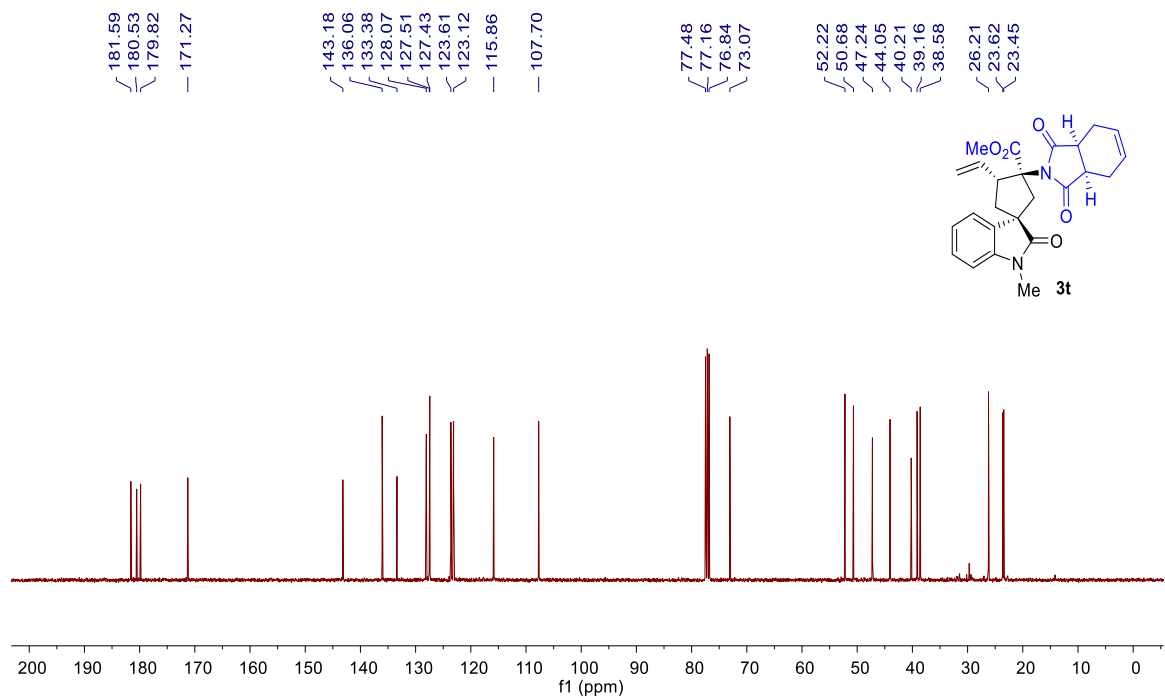

**<sup>1</sup>H NMR (400 MHz, CDCl<sub>3</sub>) of 3t'**

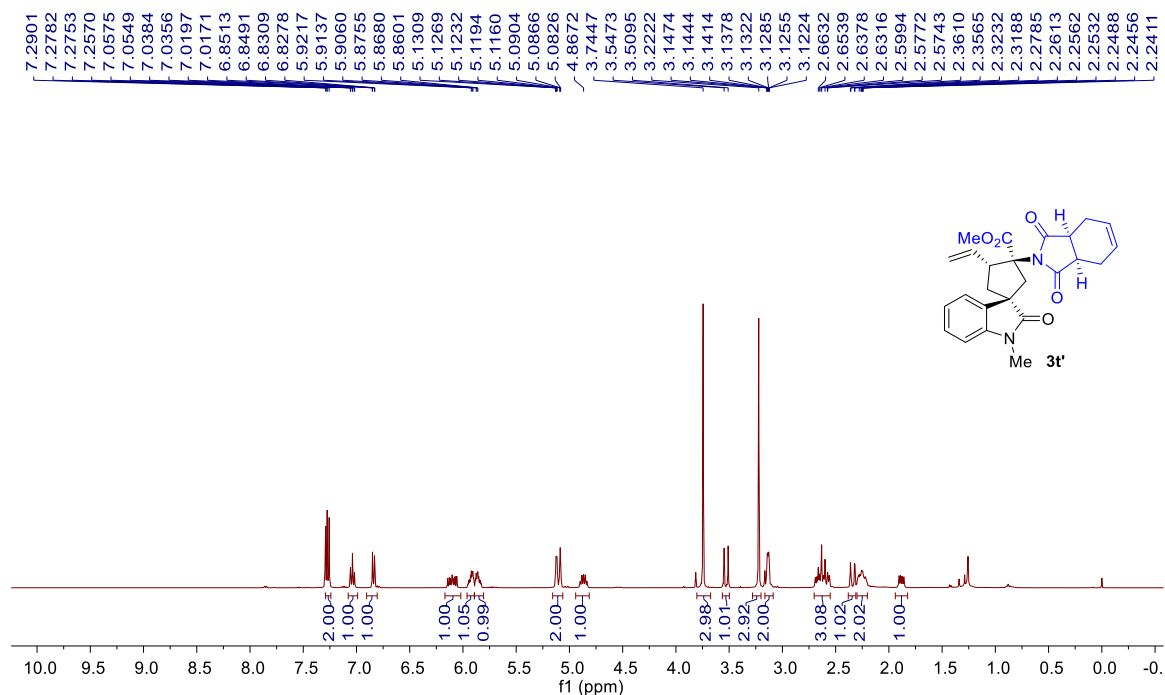

**<sup>13</sup>C NMR (101 MHz, CDCl<sub>3</sub>) of 3t'**

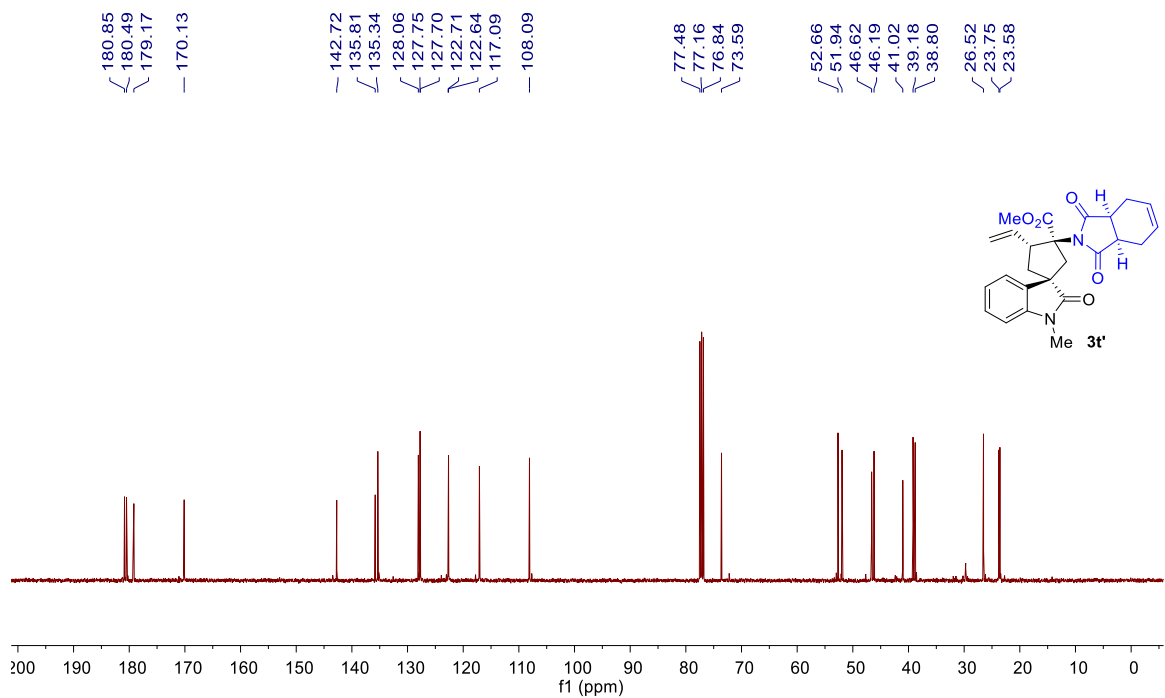

**<sup>1</sup>H NMR (400 MHz, CDCl<sub>3</sub>) of 3t''**

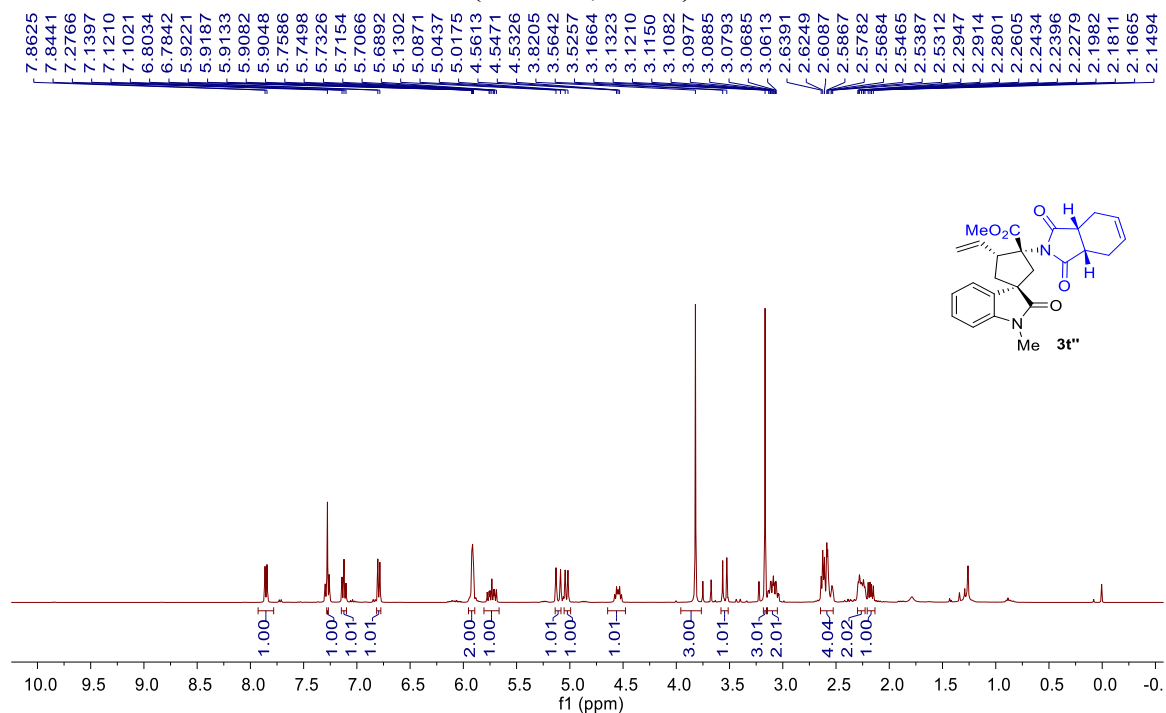

**<sup>13</sup>C NMR (101 MHz, CDCl<sub>3</sub>) of 3t''**

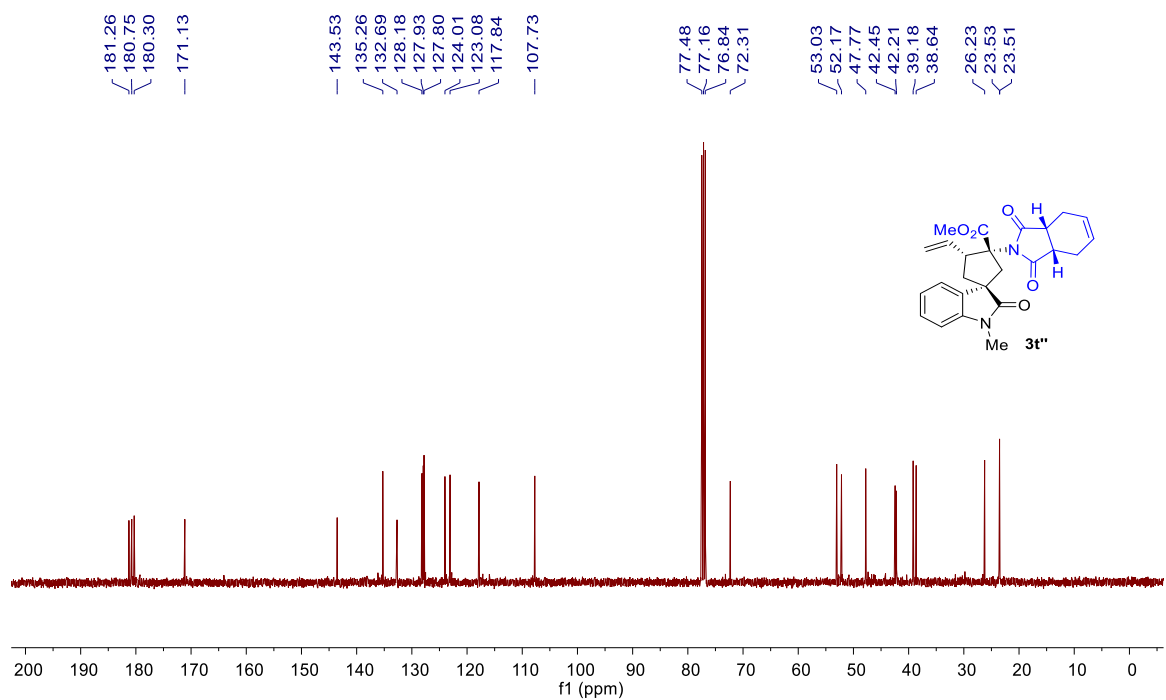

**<sup>1</sup>H NMR (400 MHz, CDCl<sub>3</sub>) of 3u**

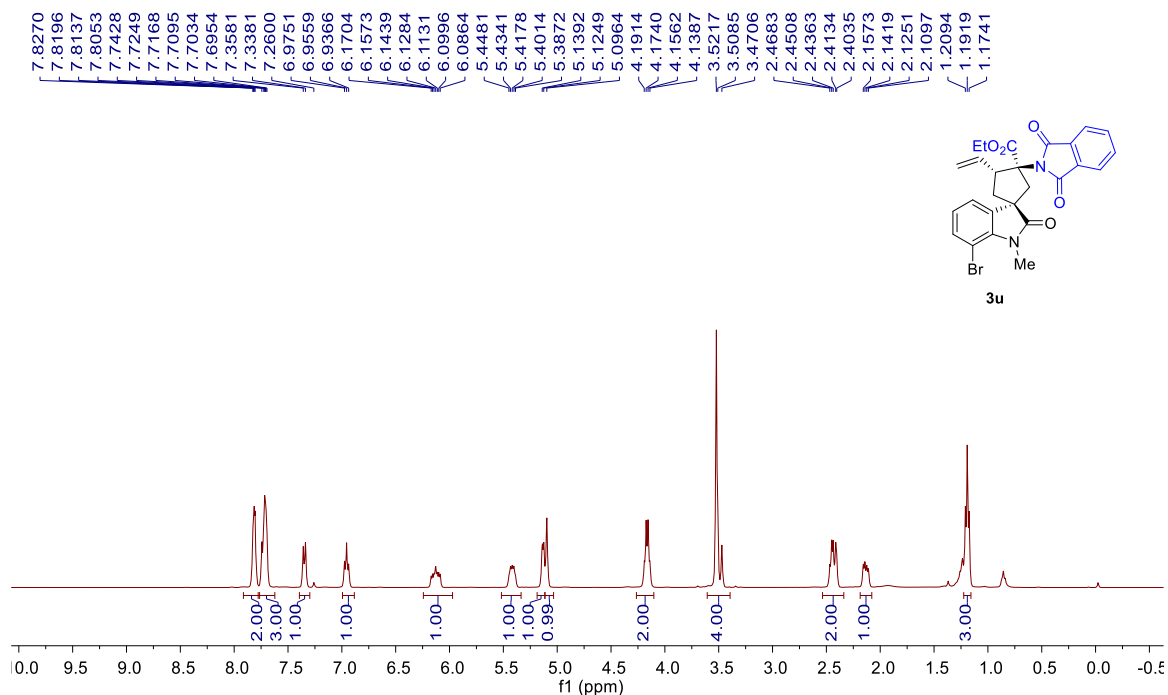

**<sup>13</sup>C NMR (101 MHz, CDCl<sub>3</sub>) of 3u**

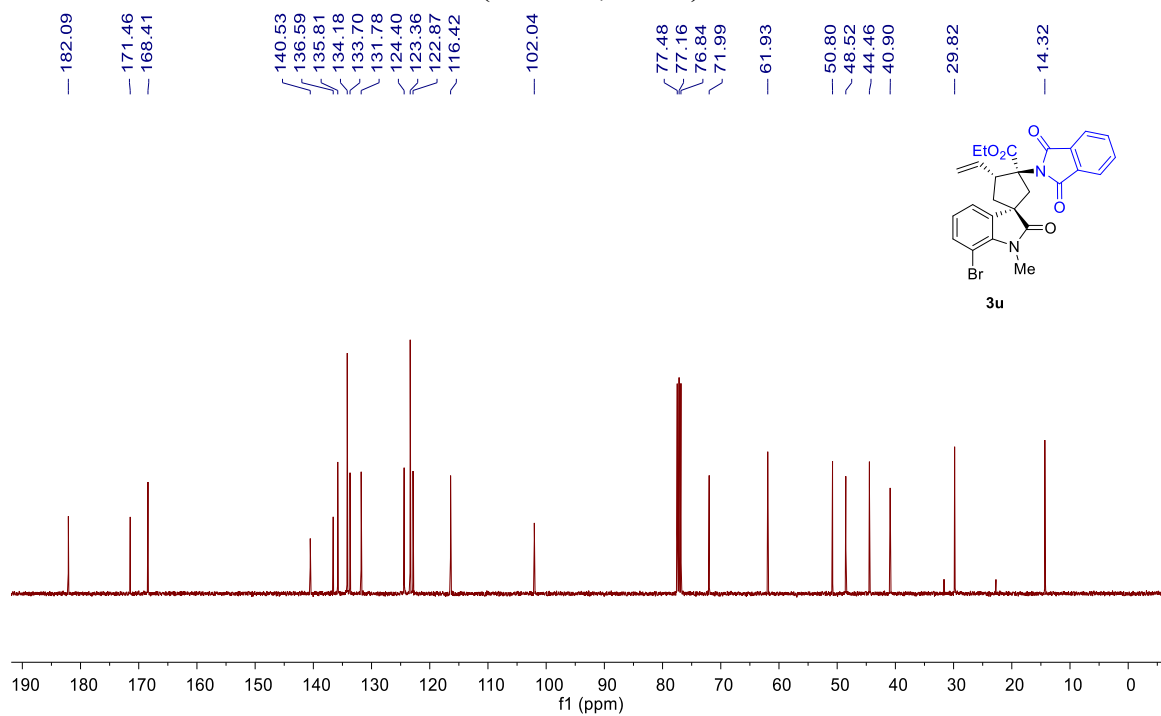

### <sup>1</sup>H NMR (400 MHz, CDCl<sub>3</sub>) of 3u'

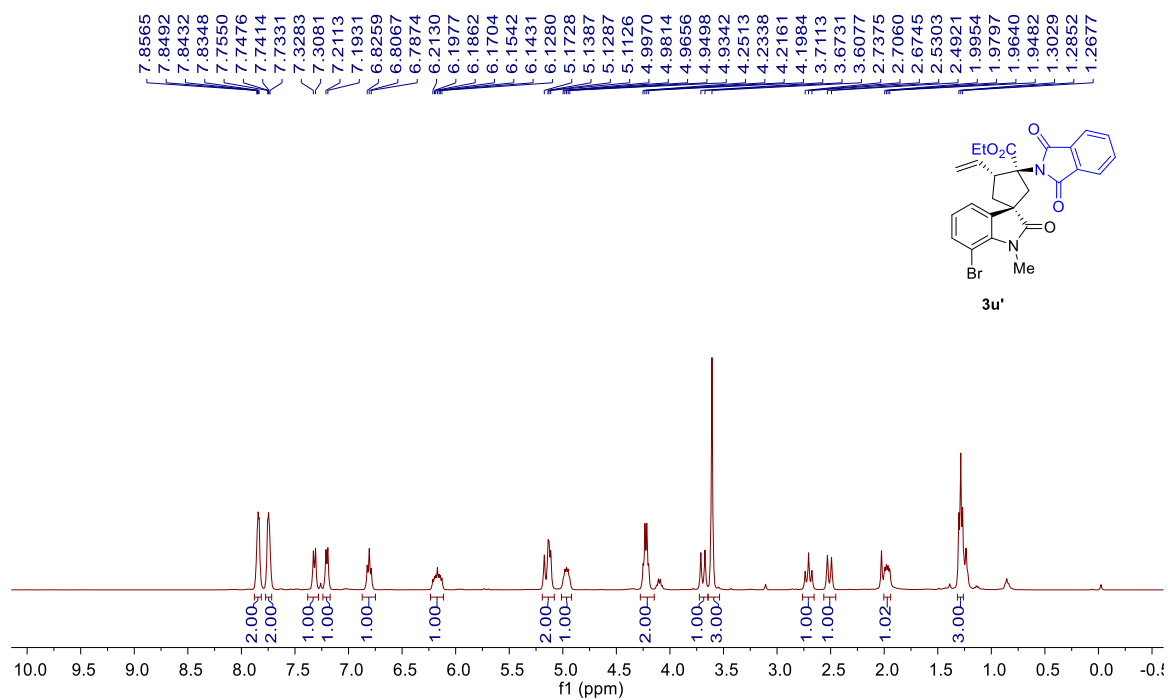

### <sup>13</sup>C NMR (101 MHz, CDCl<sub>3</sub>) of 3u'

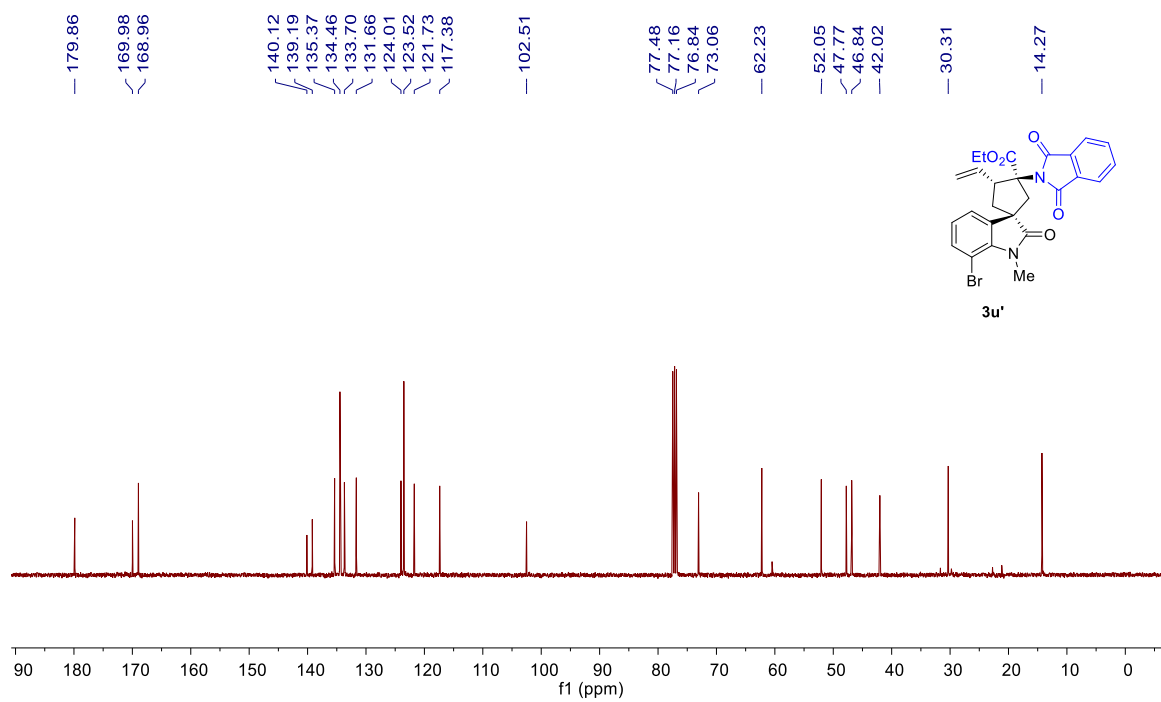

**<sup>1</sup>H NMR (400 MHz, CDCl<sub>3</sub>) of 3u''**

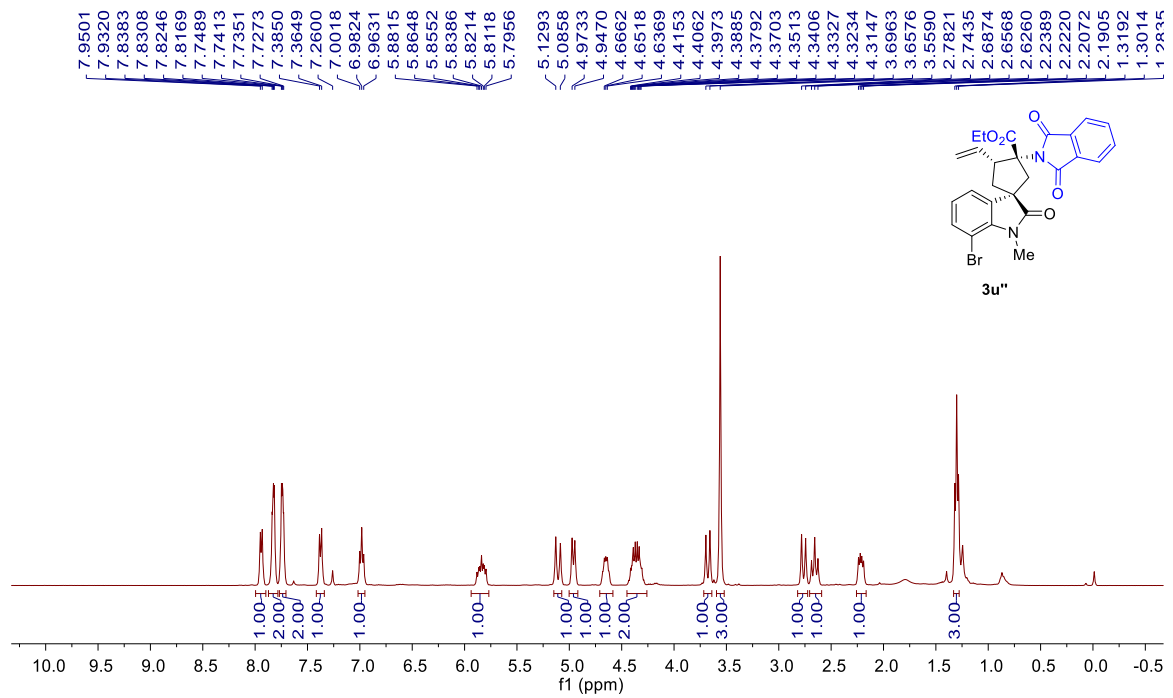

**<sup>13</sup>C NMR (101 MHz, CDCl<sub>3</sub>) of 3u''**

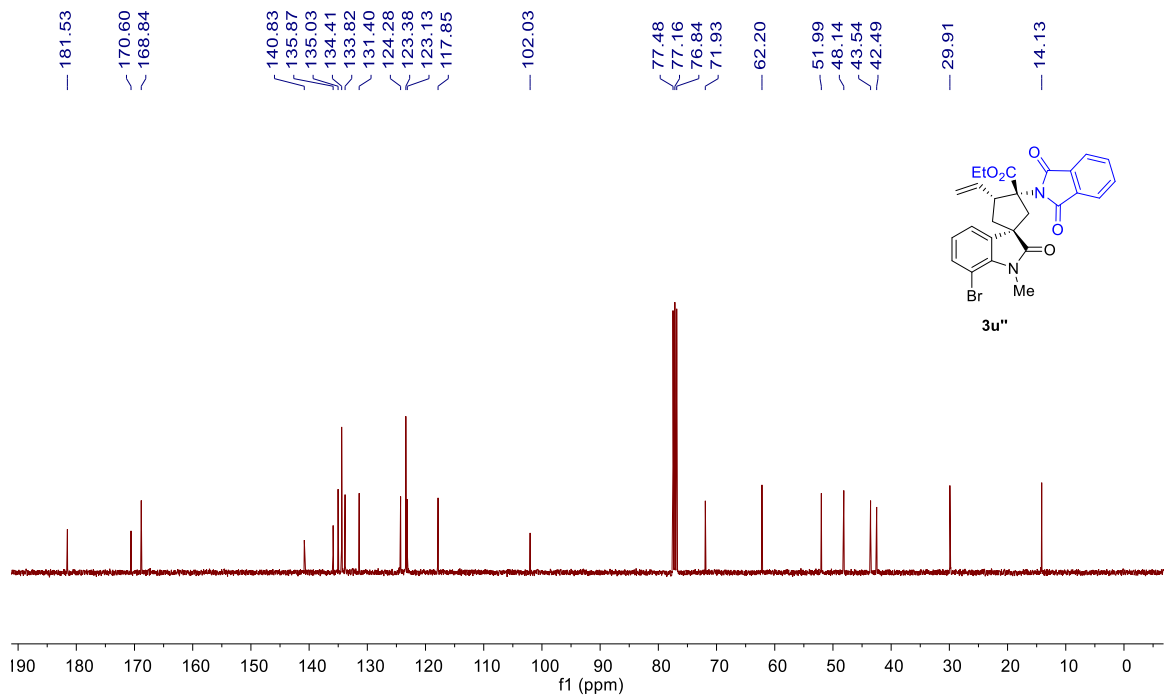

**<sup>1</sup>H NMR (400 MHz, CDCl<sub>3</sub>) of 4**

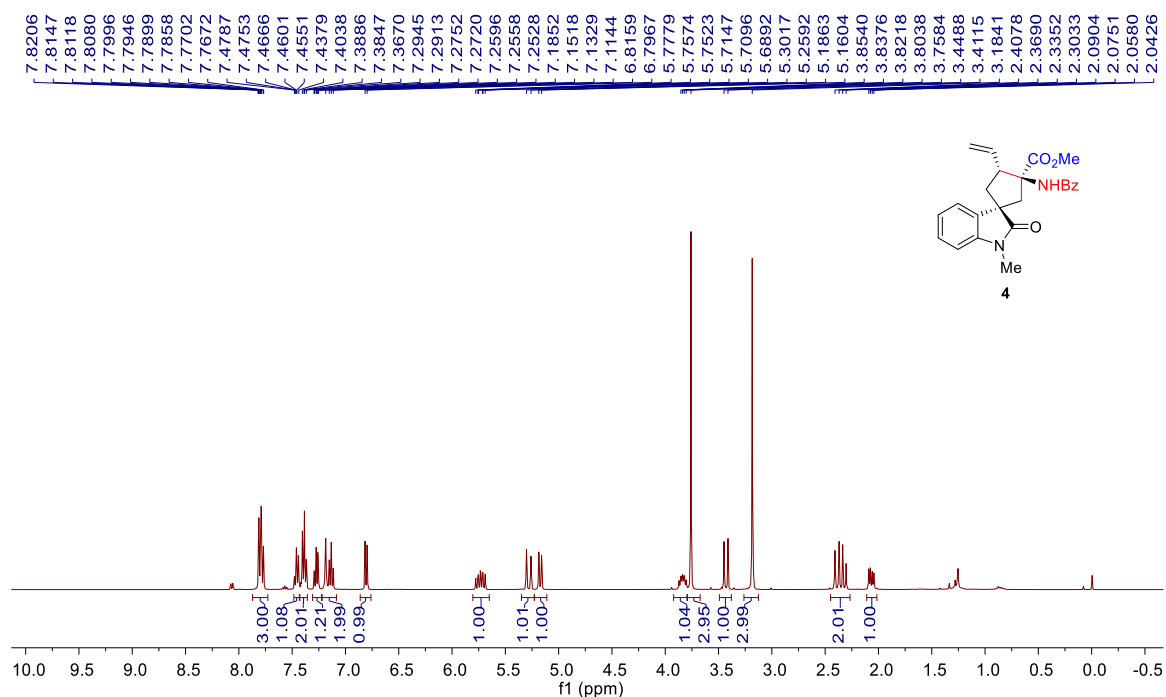

**<sup>13</sup>C NMR (101 MHz, CDCl<sub>3</sub>) of 4**

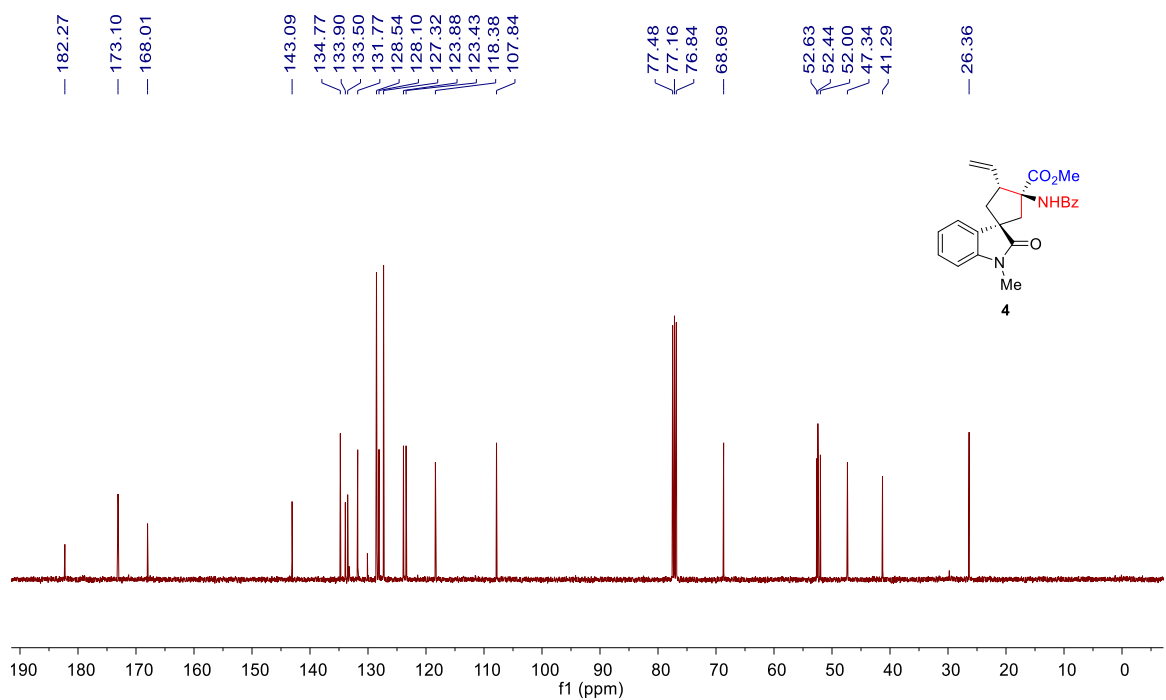

**<sup>1</sup>H NMR (400 MHz, CDCl<sub>3</sub>) of 5**

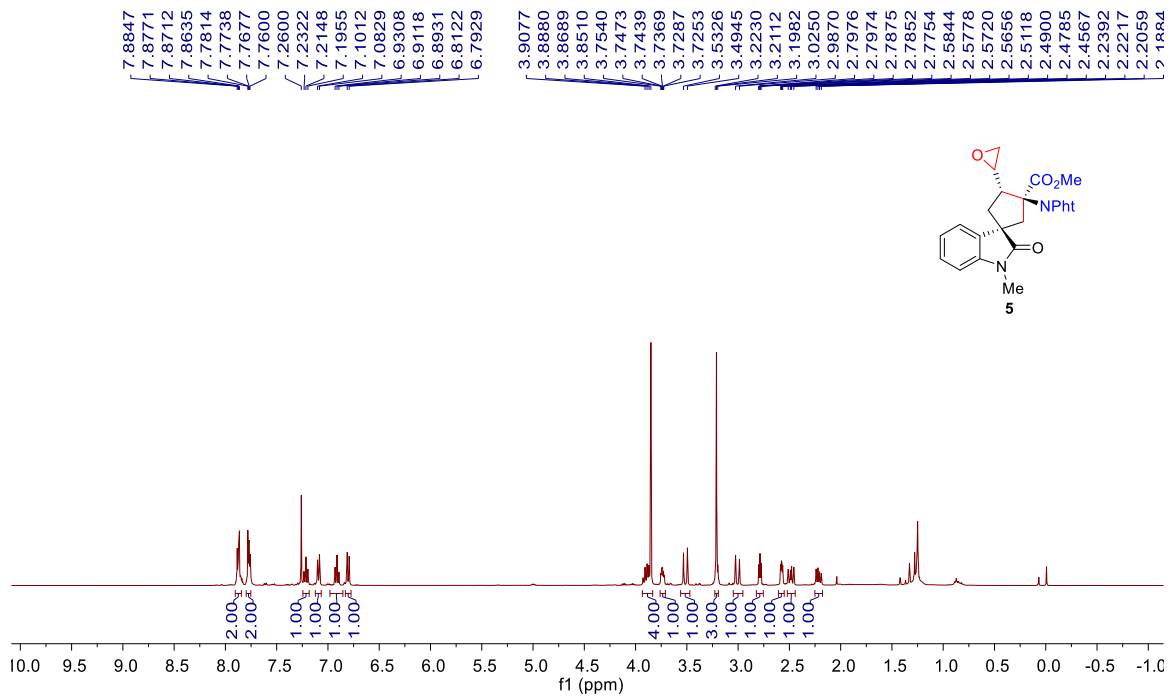

**<sup>13</sup>C NMR (101 MHz, CDCl<sub>3</sub>) of 5**

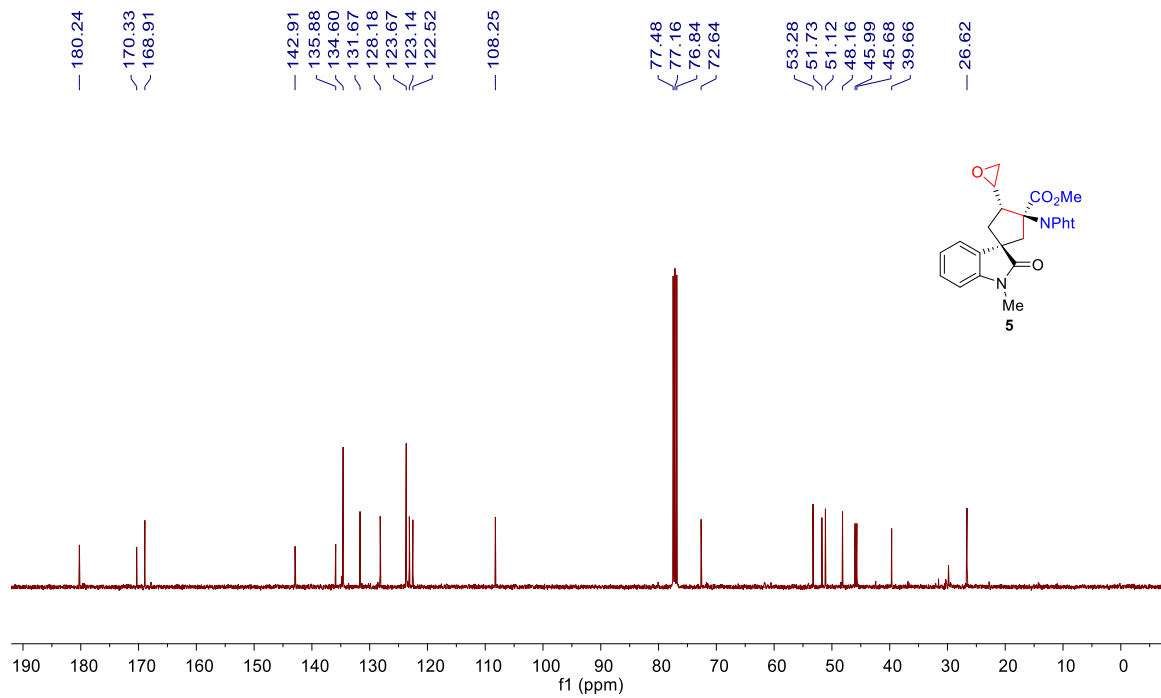

**<sup>1</sup>H NMR (400 MHz, CDCl<sub>3</sub>) of 6**

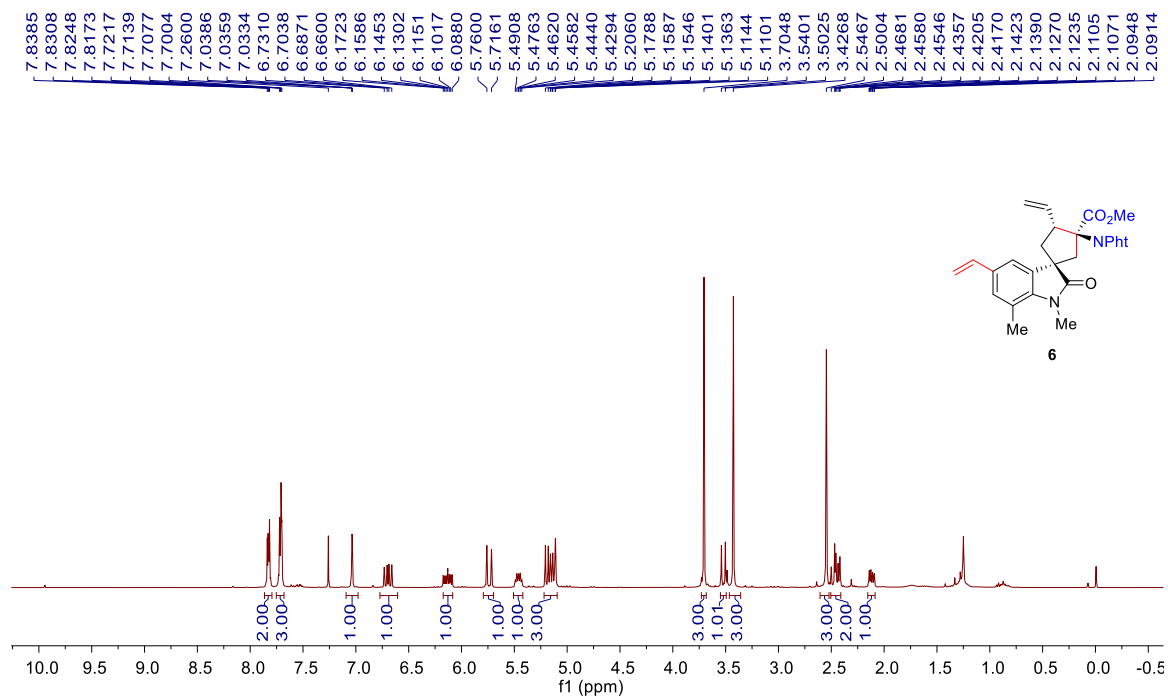

**<sup>13</sup>C NMR (101 MHz, CDCl<sub>3</sub>) of 6**

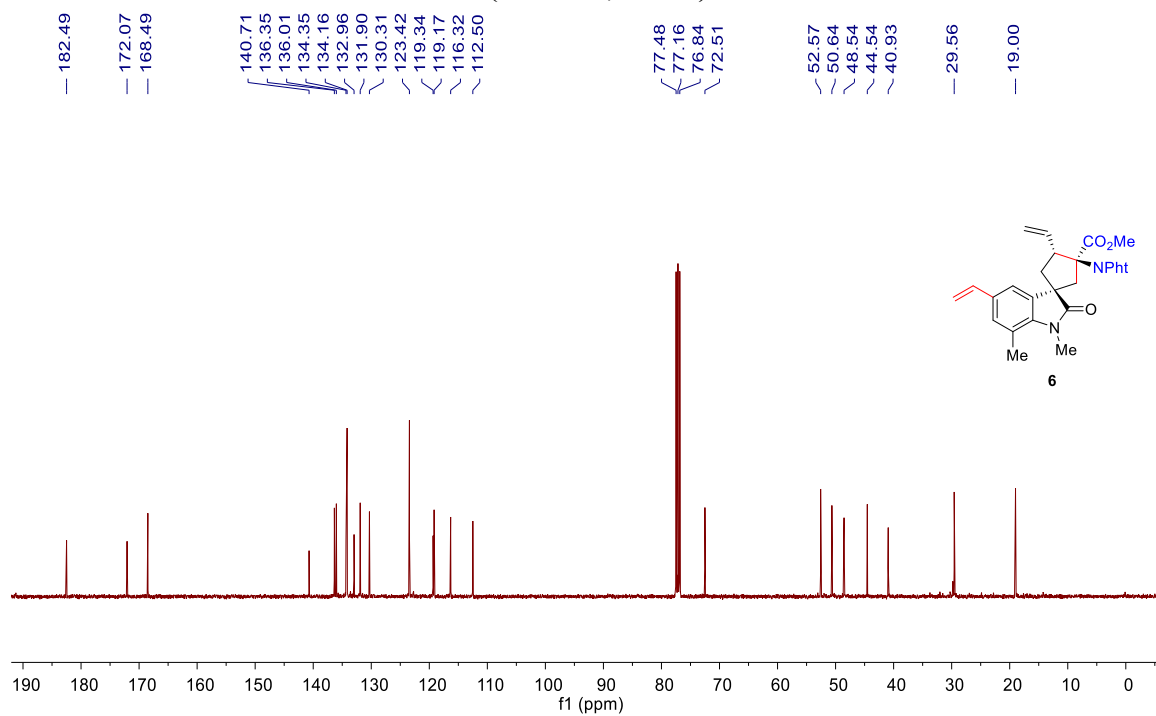

## 9.2 HPLC spectra for compounds

### HPLC spectra of *rac*-3a

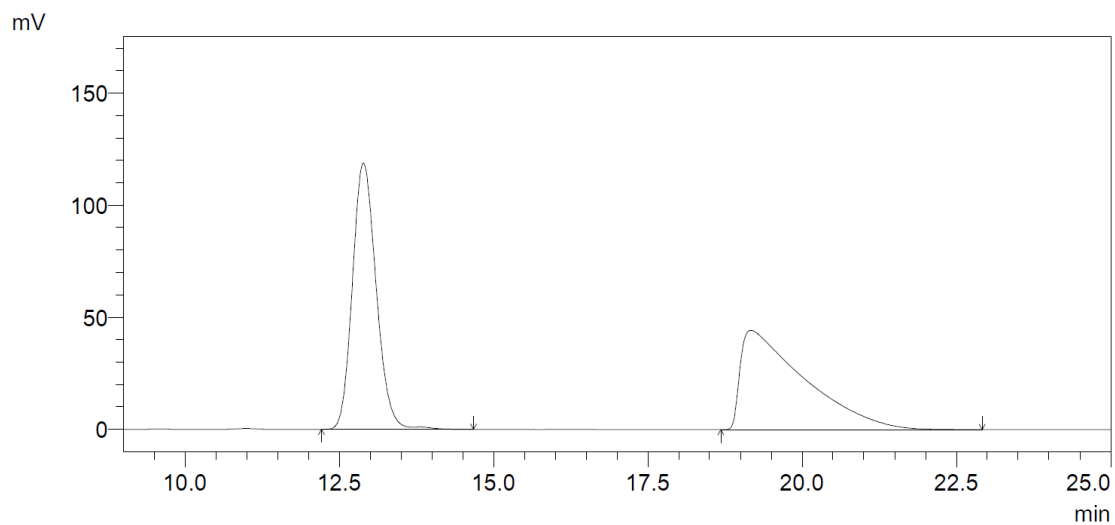

PDA 254nm

| ID# | Rt.Time | Area    | Height | Area%  |
|-----|---------|---------|--------|--------|
| 1   | 12.890  | 3190383 | 118854 | 50.046 |
| 2   | 19.168  | 3184504 | 44304  | 49.954 |

### HPLC spectra of chiral 3a

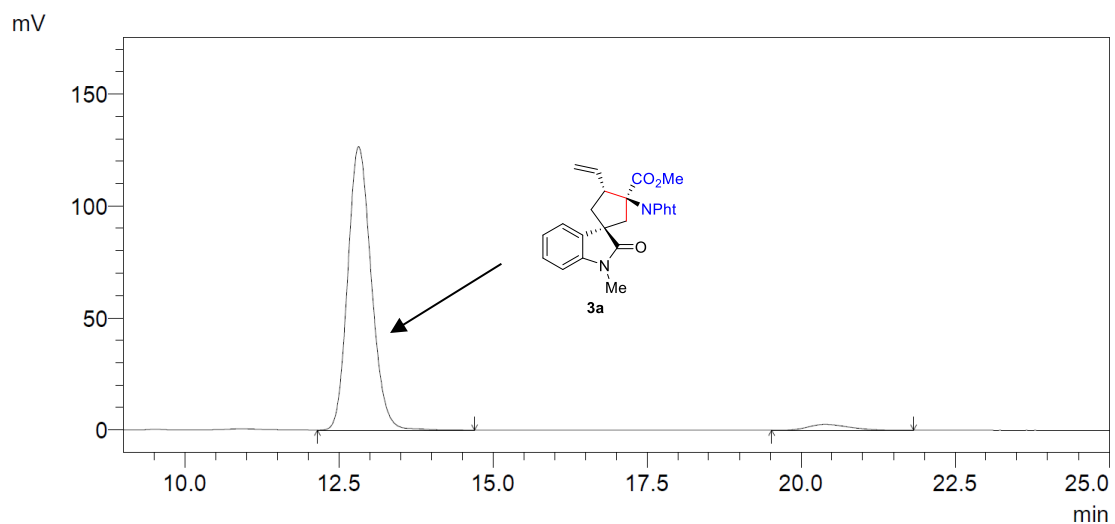

PDA 254nm

| ID# | Rt.Time | Area    | Height | Area%  |
|-----|---------|---------|--------|--------|
| 1   | 12.820  | 3359859 | 126509 | 96.535 |
| 2   | 20.396  | 120580  | 2604   | 3.465  |

**Chiral HPLC analysis:** Chiralcel AD-H, Hexane/*i*-PrOH = 85/15, flow rate 1.5 mL/min,  $\lambda = 254$  nm,  $t_{(1S,2R,4R)}$ -3a = 12.9 min (major),  $t_{(1R,2S,4S)}$ -3a = 19.2 min (minor).

### HPLC spectra of *rac*-3a'

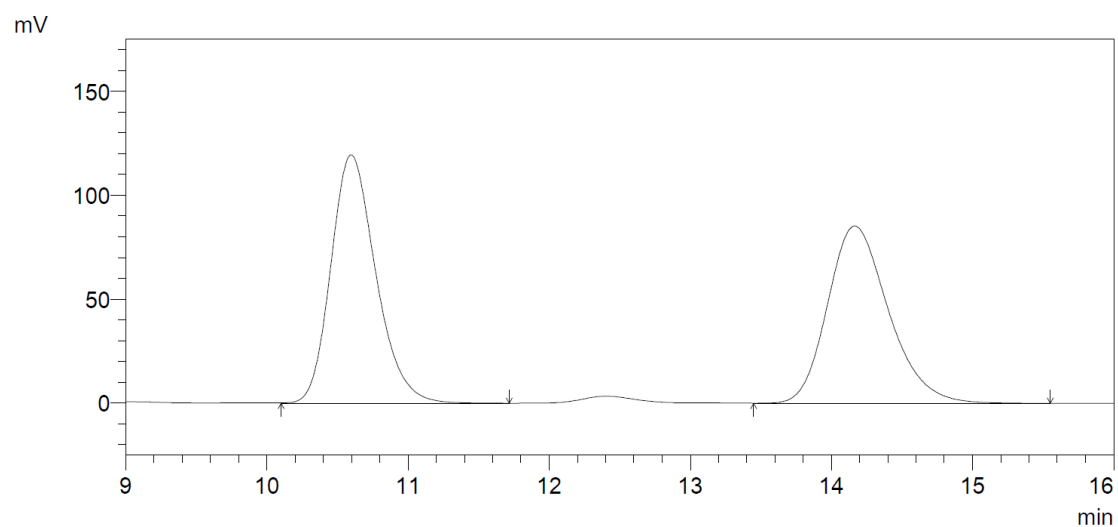

PDA 254nm

| ID# | Rt.Time | Area    | Height | Area%  |
|-----|---------|---------|--------|--------|
| 1   | 10.597  | 2649627 | 119641 | 50.816 |
| 2   | 14.165  | 2564515 | 85420  | 49.184 |

### HPLC spectra of chiral 3a'

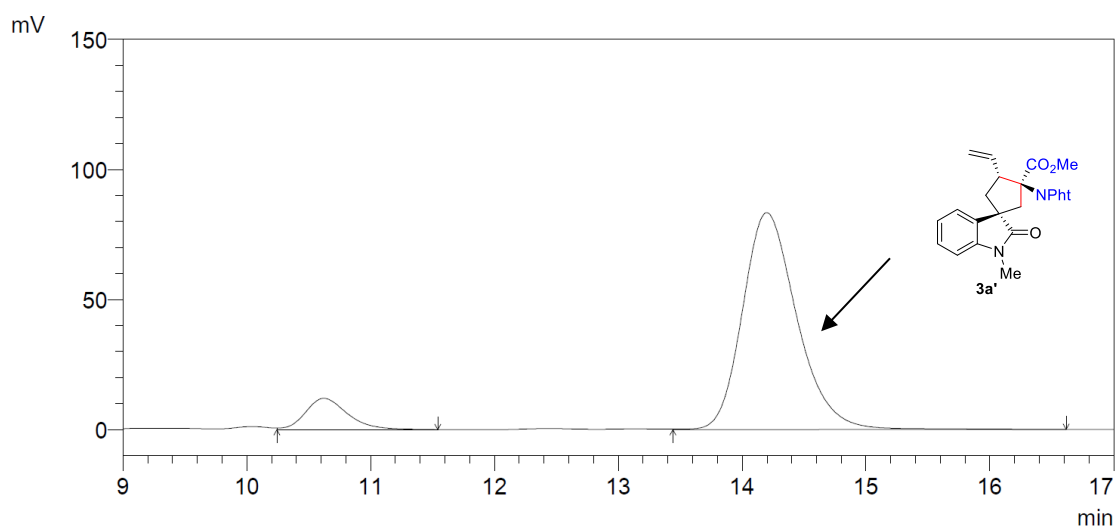

PDA 254nm

| ID# | Rt.Time | Area    | Height | Area%  |
|-----|---------|---------|--------|--------|
| 1   | 10.622  | 282625  | 12021  | 9.979  |
| 2   | 14.198  | 2549533 | 83460  | 90.021 |

**Chiral HPLC analysis:** Chiralcel AD-H, Hexane/*i*-PrOH = 85/15, flow rate 1.5 mL/min,  $\lambda = 254$  nm,  $t_{(1R,2R,4S)}$ -3a' = 10.6 min (minor),  $t_{(1S,2S,4R)}$ -3a' = 14.2 min (major).

### HPLC spectra of *rac-3a''*

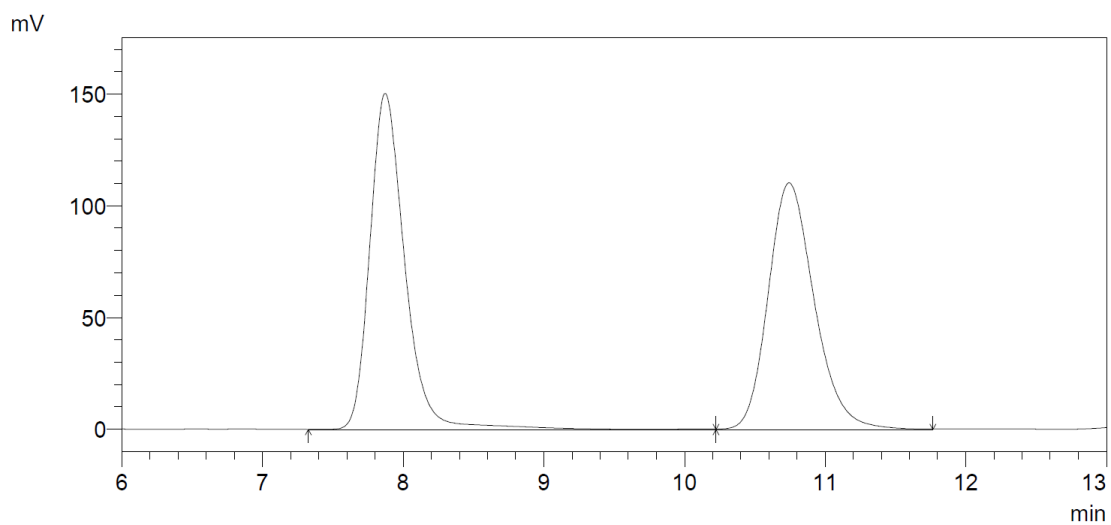

PDA 254nm

| ID# | Rt.Time | Area    | Height | Area%  |
|-----|---------|---------|--------|--------|
| 1   | 7.872   | 2603742 | 150275 | 50.882 |
| 2   | 10.743  | 2513514 | 110351 | 49.118 |

### HPLC spectra of chiral *3a''*

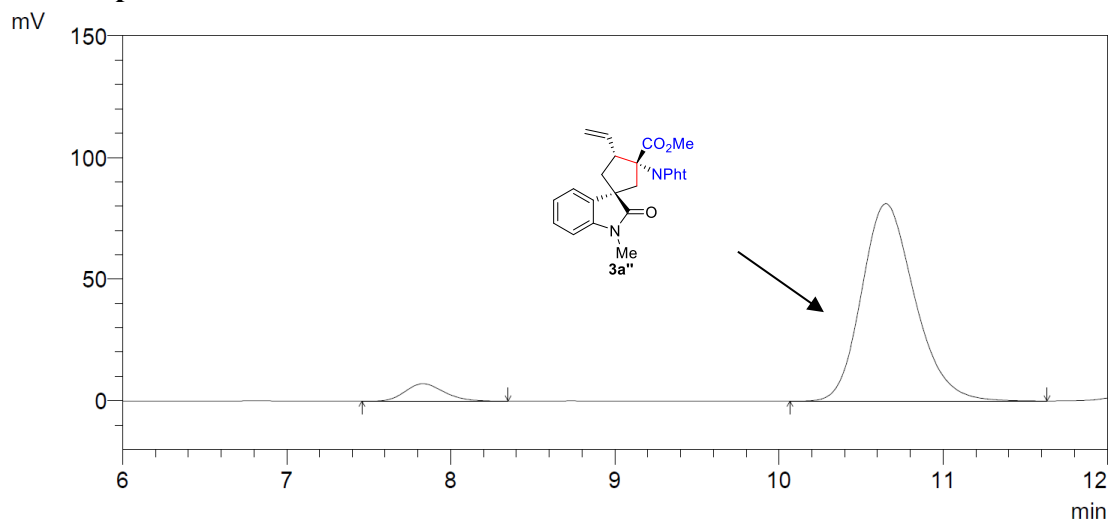

PDA 254nm

| ID# | Rt.Time | Area    | Height | Area%  |
|-----|---------|---------|--------|--------|
| 1   | 7.830   | 118356  | 7186   | 6.079  |
| 2   | 10.651  | 1828522 | 81196  | 93.921 |

**Chiral HPLC analysis:** Chiralcel AD-H, Hexane/*i*-PrOH = 85/15, flow rate 1.5 mL/min,  $\lambda = 254$  nm,  $t_{(1S,2R,4S)-3a''} = 7.9$  min (minor),  $t_{(1R,2S,4R)-3a''} = 10.7$  min (major).

### HPLC spectra of *rac*-3b

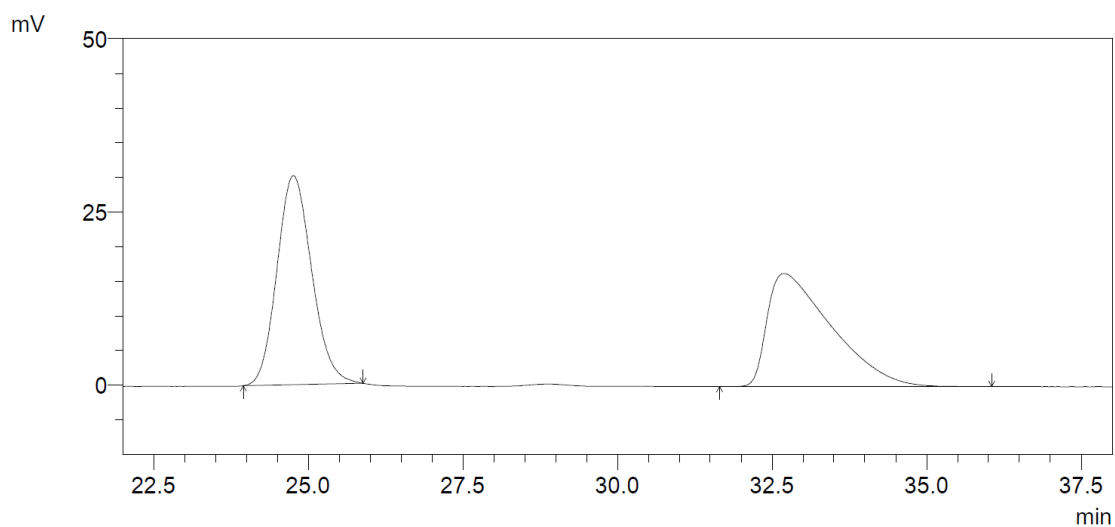

PDA 254nm

| ID# | Rt.Time | Area    | Height | Area%  |
|-----|---------|---------|--------|--------|
| 1   | 24.757  | 1181869 | 30183  | 50.111 |
| 2   | 32.692  | 1176645 | 16331  | 49.889 |

### HPLC spectra of chiral 3b

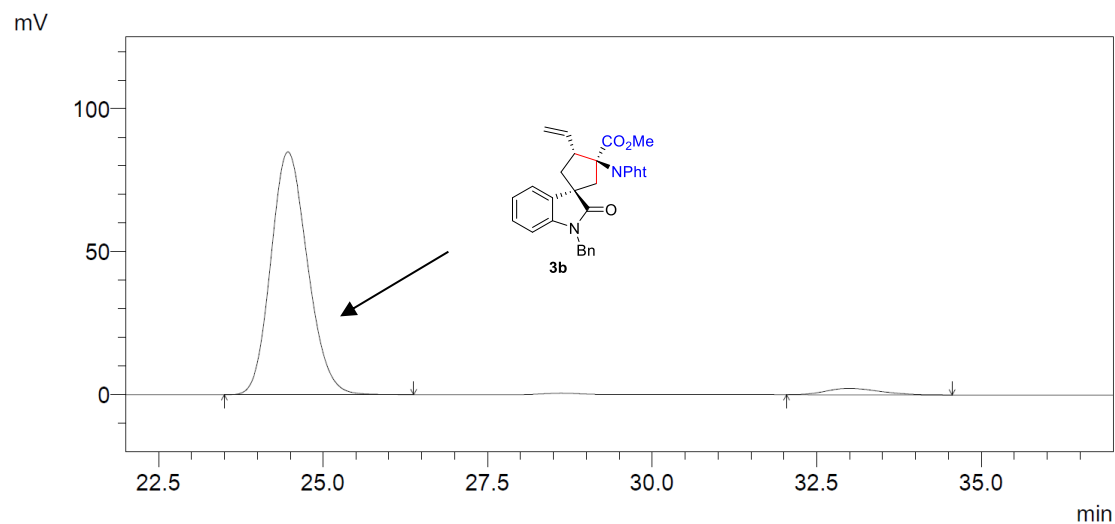

PDA 254nm

| ID# | Rt.Time | Area    | Height | Area%  |
|-----|---------|---------|--------|--------|
| 1   | 24.464  | 3299909 | 84993  | 96.334 |
| 2   | 33.005  | 125563  | 2229   | 3.666  |

**Chiral HPLC analysis:** Chiralcel AD-H, Hexane/*i*-PrOH = 90/10, flow rate 1.0 mL/min,  $\lambda = 254$  nm,  $t_{(1S,2R,4R)\text{-}3b} = 24.8$  min (major),  $t_{(1R,2S,4S)\text{-}3b} = 32.7$  min (minor).

### HPLC spectra of *rac*-3b'

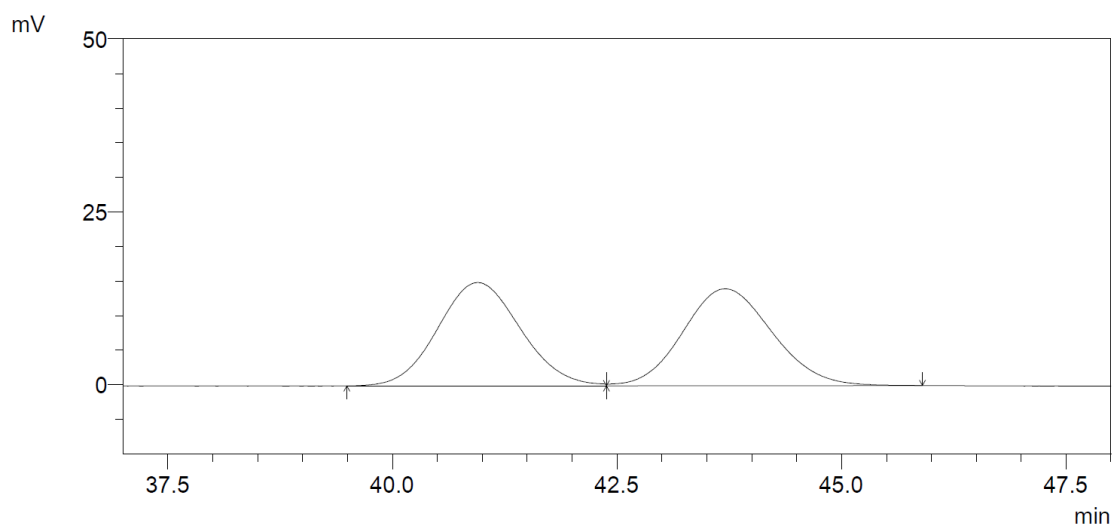

PDA 254nm

| ID# | Rt.Time | Area   | Height | Area%  |
|-----|---------|--------|--------|--------|
| 1   | 40.951  | 958290 | 14944  | 49.714 |
| 2   | 43.711  | 969305 | 14008  | 50.286 |

### HPLC spectra of chiral 3b'

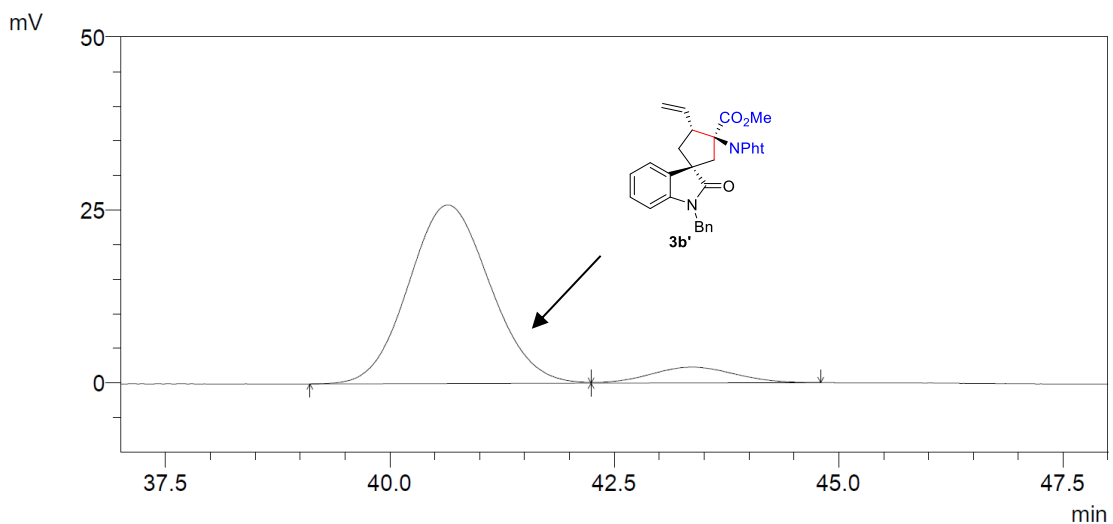

PDA 254nm

| ID# | Rt.Time | Area    | Height | Area%  |
|-----|---------|---------|--------|--------|
| 1   | 40.643  | 1634162 | 25824  | 91.601 |
| 2   | 43.370  | 149846  | 2292   | 8.399  |

**Chiral HPLC analysis:** Chiralcel AD-H, Hexane/*i*-PrOH = 90/10, flow rate 1.0 mL/min,  $\lambda = 254$  nm,  $t_{(1R,2R,4S)-3b'}$  = 41.0 min (major),  $t_{(1S,2S,4R)-3b'}$  = 43.7 min (minor).

### HPLC spectra of *rac*-3b''

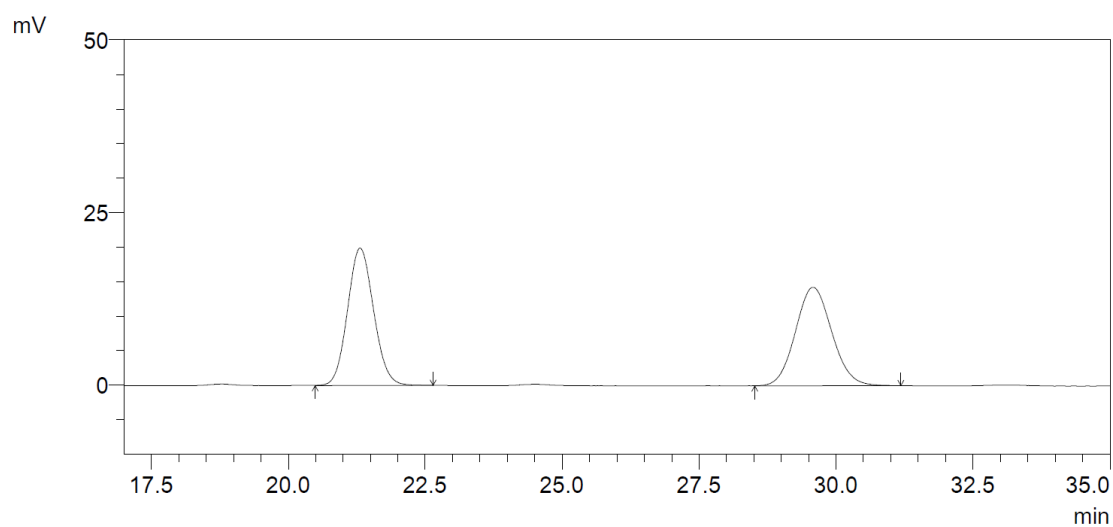

PDA 254nm

| ID# | Rt.Time | Area   | Height | Area%  |
|-----|---------|--------|--------|--------|
| 1   | 21.310  | 660780 | 19913  | 50.055 |
| 2   | 29.579  | 659330 | 14272  | 49.945 |

### HPLC spectra of chiral 3b''

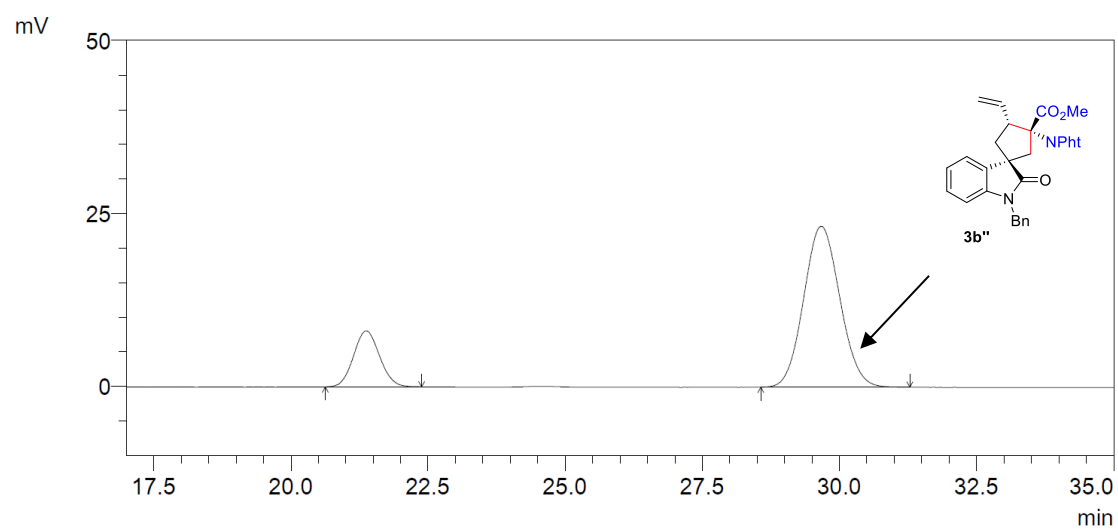

PDA 254nm

| ID# | Rt.Time | Area    | Height | Area%  |
|-----|---------|---------|--------|--------|
| 1   | 21.371  | 268081  | 8100   | 20.058 |
| 2   | 29.669  | 1068460 | 23281  | 79.942 |

**Chiral HPLC analysis:** Chiralcel AD-H, Hexane/*i*-PrOH = 90/10, flow rate 1.0 mL/min,  $\lambda = 254$  nm,  $t_{(1S,2R,4S)}\text{-3a''} = 21.3$  min (minor),  $t_{(1R,2S,4R)}\text{-3a''} = 29.6$  min (major).

### HPLC spectra of *rac*-3c

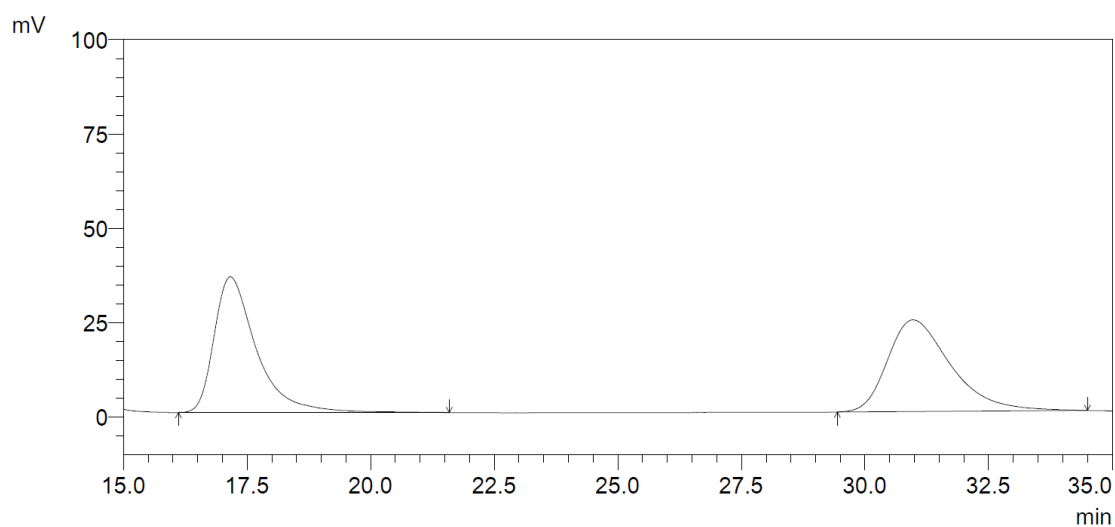

PDA 254nm

| ID# | Rt.Time | Area    | Height | Area%  |
|-----|---------|---------|--------|--------|
| 1   | 17.160  | 2138407 | 35958  | 49.745 |
| 2   | 30.968  | 2160334 | 24321  | 50.255 |

### HPLC spectra of chiral 3c

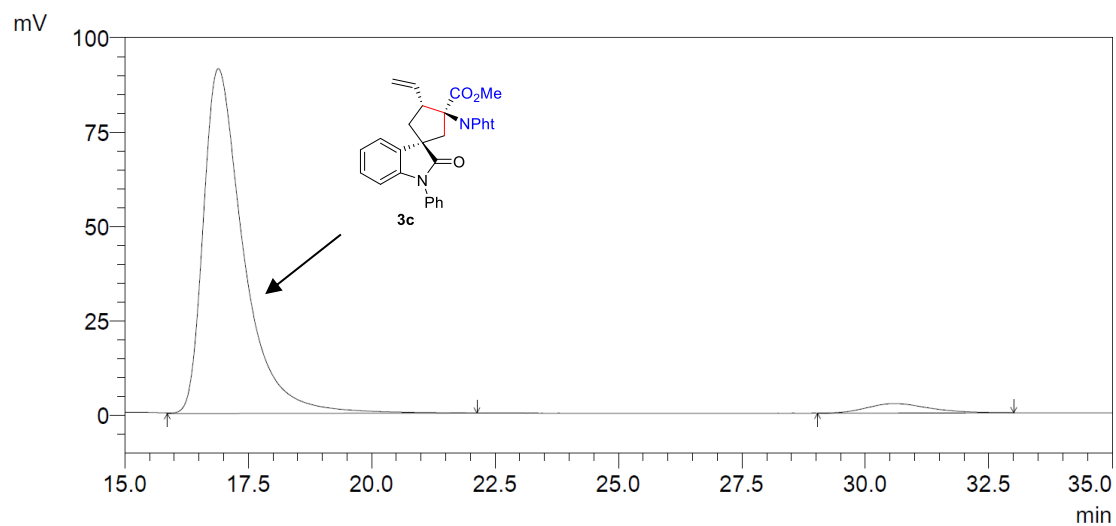

PDA 254nm

| ID# | Rt.Time | Area    | Height | Area%  |
|-----|---------|---------|--------|--------|
| 1   | 16.892  | 5193248 | 91418  | 95.904 |
| 2   | 30.595  | 221821  | 2504   | 4.096  |

**Chiral HPLC analysis:** Chiralcel OD-H, Hexane/*i*-PrOH = 90/10, flow rate 1.0 mL/min,  $\lambda = 254$  nm,  $t_{(1S,2R,4R)\text{-}3c} = 17.2$  min (major),  $t_{(1R,2S,4S)\text{-}3c} = 31.0$  min (minor).

### HPLC spectra of *rac*-3c'

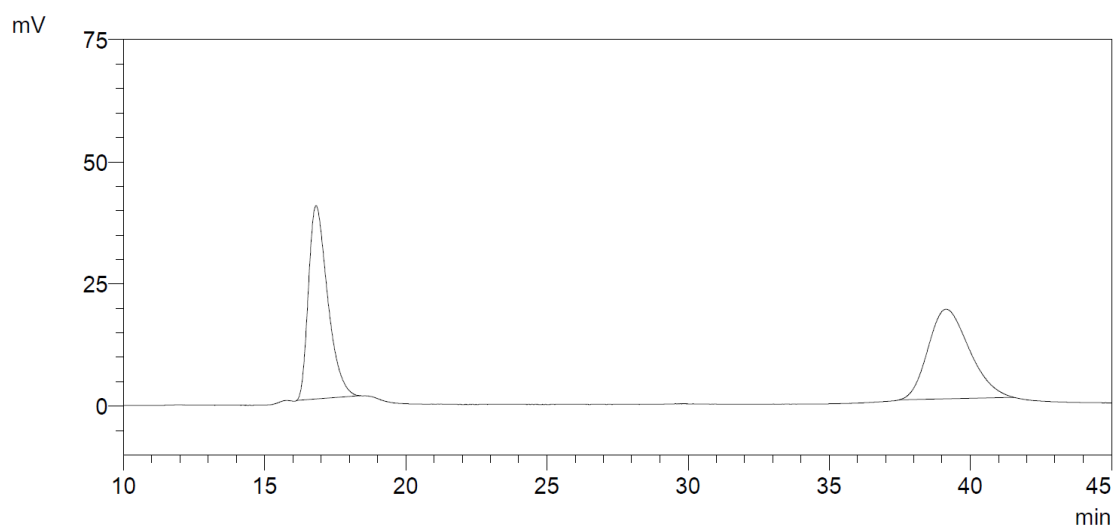

PDA 254nm

| ID# | Rt.Time | Area    | Height | Area%  |
|-----|---------|---------|--------|--------|
| 1   | 16.822  | 1876953 | 39582  | 50.191 |
| 2   | 39.139  | 1862674 | 18346  | 49.809 |

### HPLC spectra of chiral 3c'

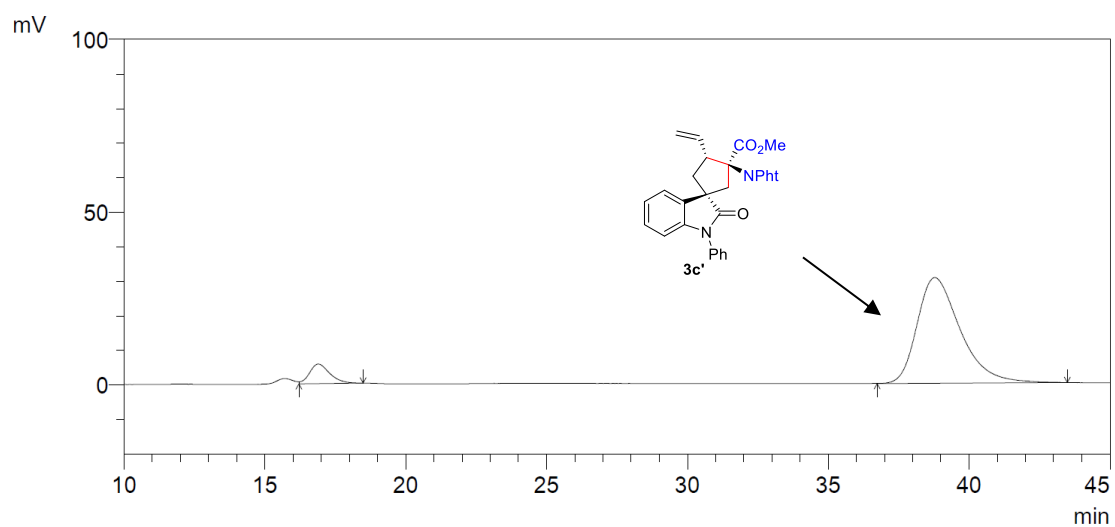

PDA 254nm

| ID# | Rt.Time | Area    | Height | Area%  |
|-----|---------|---------|--------|--------|
| 1   | 16.896  | 282519  | 5655   | 7.996  |
| 2   | 38.782  | 3250694 | 30571  | 92.004 |

**Chiral HPLC analysis:** Chiralcel OD-H, Hexane/*i*-PrOH = 90/10, flow rate 1.0 mL/min,  $\lambda = 254$  nm,  $t_{(1R,2R,4S)}$ -3c' = 10.6 min (minor),  $t_{(1S,2S,4R)}$ -3c' = 14.2 min (major).

### HPLC spectra of *rac-3c''*

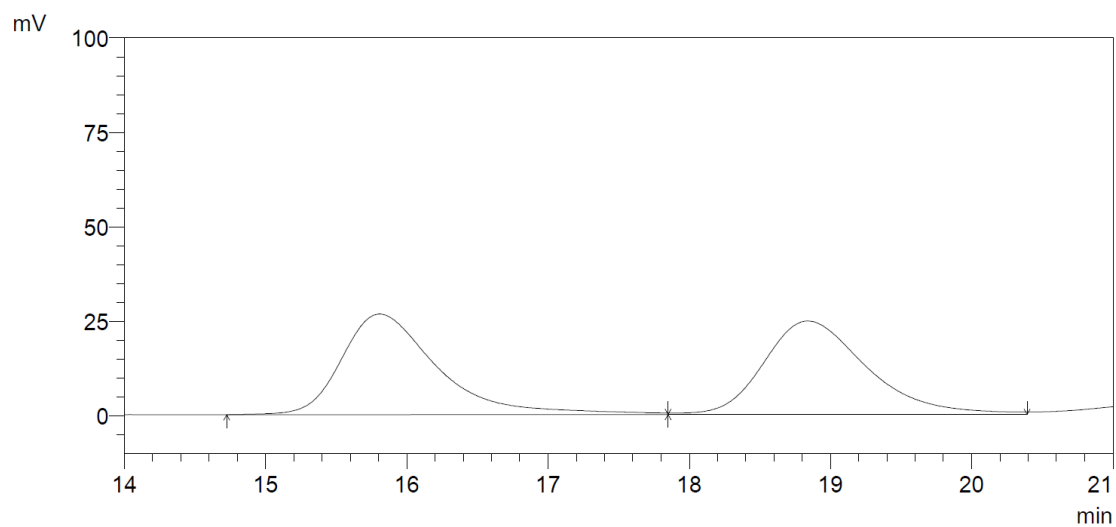

PDA 254nm

| ID# | Rt.Time | Area    | Height | Area%  |
|-----|---------|---------|--------|--------|
| 1   | 15.808  | 1262760 | 26639  | 50.107 |
| 2   | 18.840  | 1257346 | 24750  | 49.893 |

### HPLC spectra of chiral *3c''*

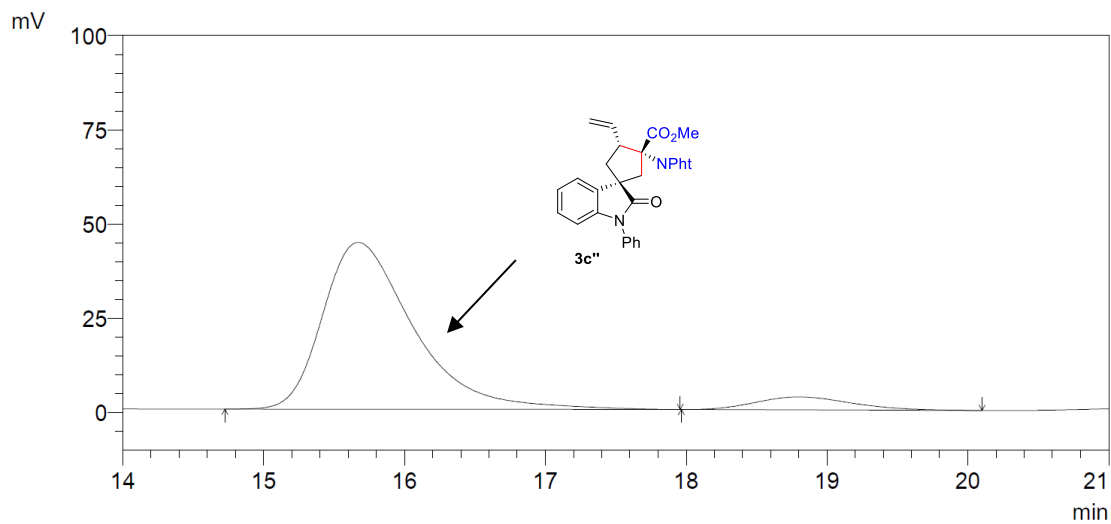

PDA 254nm

| ID# | Rt.Time | Area    | Height | Area%  |
|-----|---------|---------|--------|--------|
| 1   | 15.672  | 1989112 | 44321  | 92.404 |
| 2   | 18.801  | 163506  | 3444   | 7.596  |

**Chiral HPLC analysis:** Chiralcel OD-H, Hexane/*i*-PrOH = 90/10, flow rate 1.0 mL/min,  $\lambda = 254$  nm,  $t_{(1S,2R,4S)-3c''} = 15.8$  min (major),  $t_{(1R,2S,4R)-3c''} = 18.8$  min (minor).

### HPLC spectra of *rac*-3d

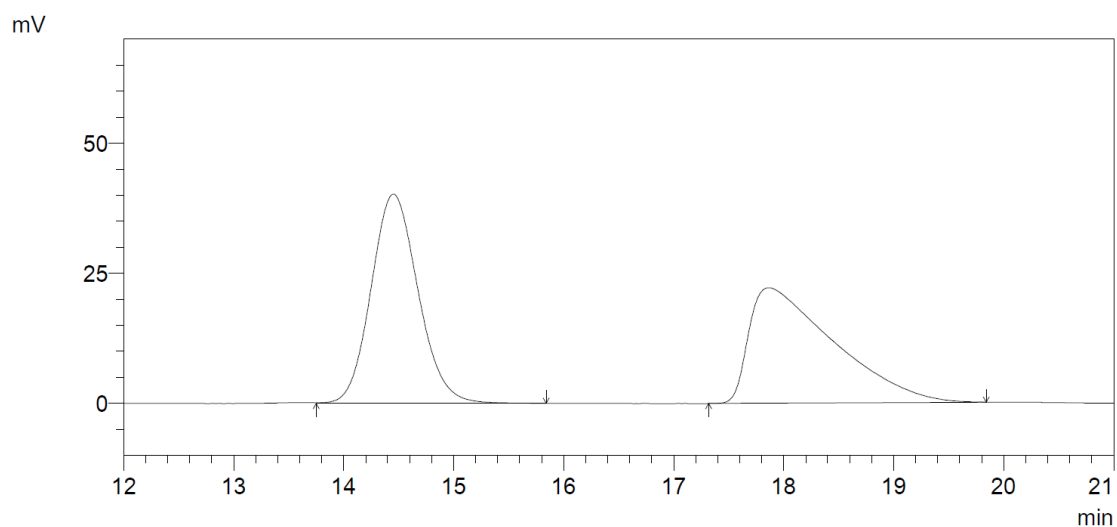

PDA 254nm

| ID# | Rt.Time | Area    | Height | Area%  |
|-----|---------|---------|--------|--------|
| 1   | 14.452  | 1196353 | 40247  | 50.185 |
| 2   | 17.863  | 1187527 | 22220  | 49.815 |

### HPLC spectra of chiral 3d

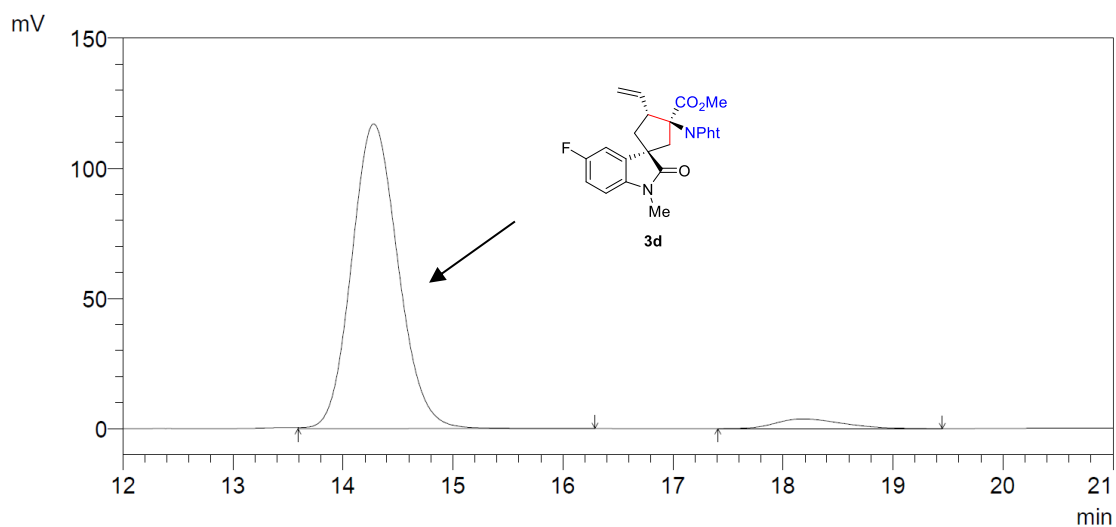

PDA 254nm

| ID# | Rt.Time | Area    | Height | Area%  |
|-----|---------|---------|--------|--------|
| 1   | 14.280  | 3439508 | 117118 | 95.611 |
| 2   | 18.184  | 157902  | 3746   | 4.389  |

**Chiral HPLC analysis:** Chiralcel AD-H, Hexane/*i*-PrOH = 85/15, flow rate 1.5 mL/min,  $\lambda = 254$  nm,  $t_{(1S,2R,4R)}\text{-3d} = 14.5$  min (major),  $t_{(1R,2S,4S)}\text{-3d} = 17.9$  min (minor).

### HPLC spectra of *rac*-3d'

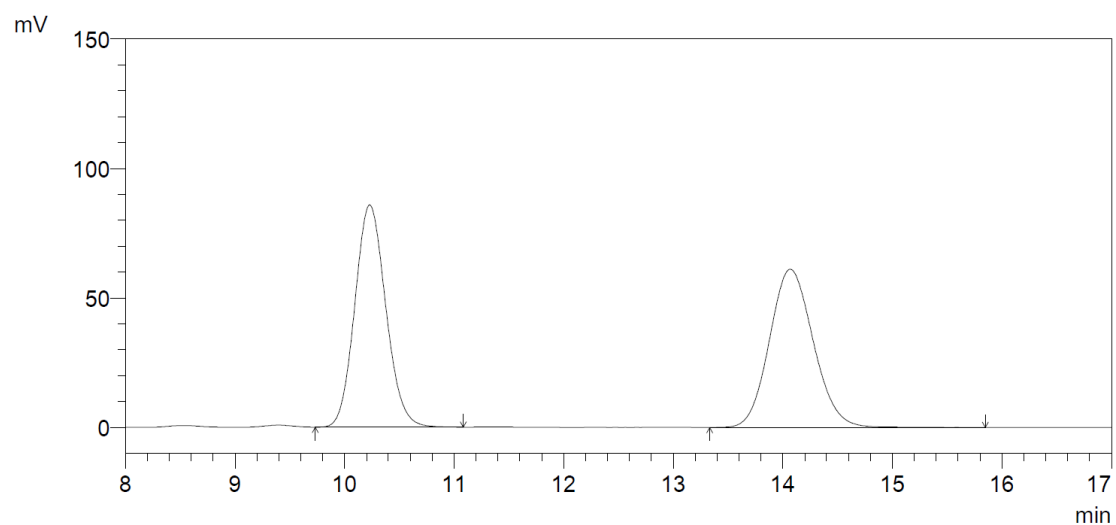

PDA 254nm

| ID# | Rt.Time | Area    | Height | Area%  |
|-----|---------|---------|--------|--------|
| 1   | 10.228  | 1695682 | 85934  | 49.935 |
| 2   | 14.068  | 1700120 | 61125  | 50.065 |

### HPLC spectra of chiral 3d'

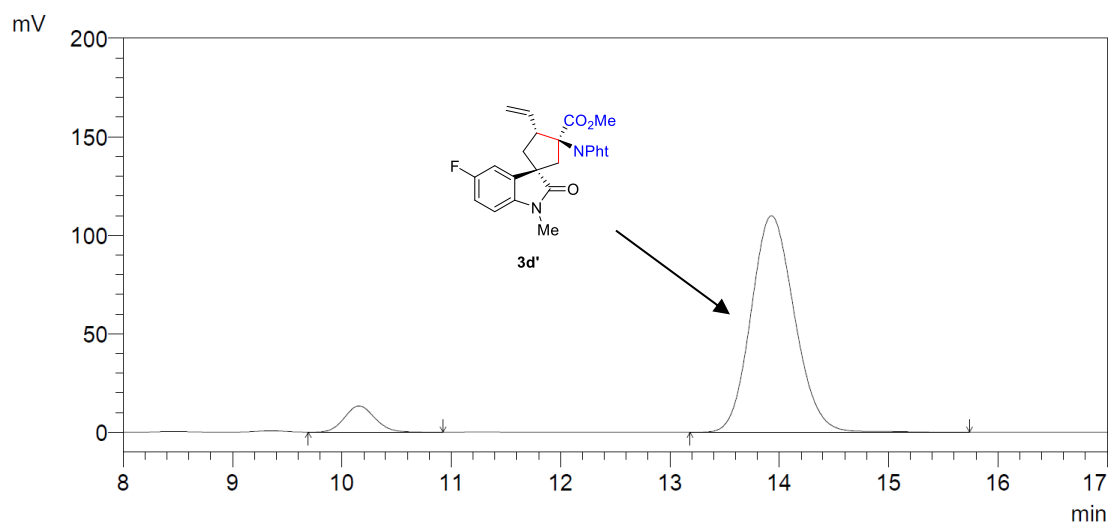

PDA 254nm

| ID# | Rt.Time | Area    | Height | Area%  |
|-----|---------|---------|--------|--------|
| 1   | 10.156  | 259798  | 13325  | 7.883  |
| 2   | 13.929  | 3036027 | 109970 | 92.117 |

**Chiral HPLC analysis:** Chiralcel AD-H, Hexane/*i*-PrOH = 85/15, flow rate 1.5 mL/min,  $\lambda = 254$  nm,  $t_{(1R,2R,4S)}$ -3d' = 10.2 min (minor),  $t_{(1S,2S,4R)}$ -3d' = 14.1 min (major).

### HPLC spectra of *rac*-3d''

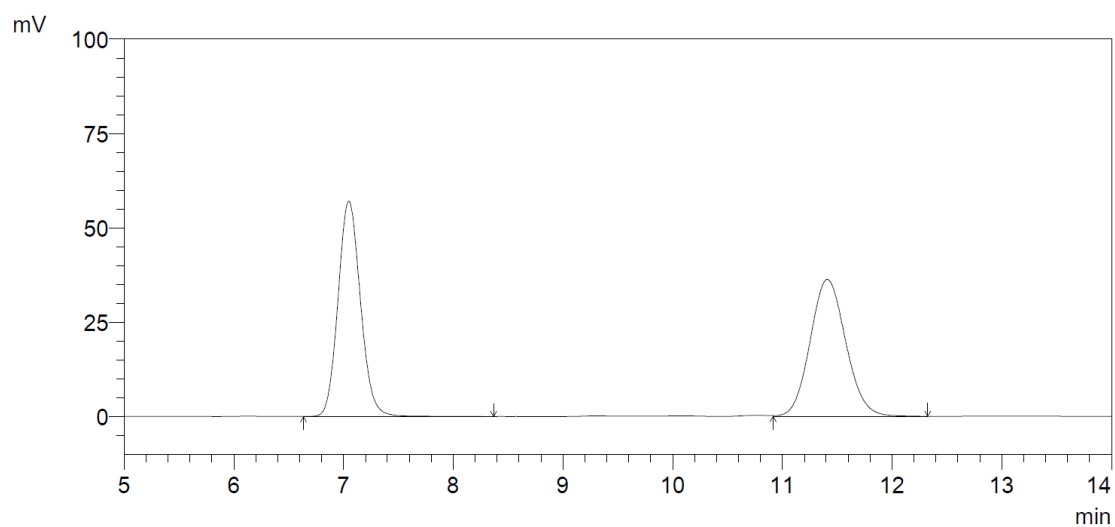

PDA 254nm

| ID# | Rt.Time | Area   | Height | Area%  |
|-----|---------|--------|--------|--------|
| 1   | 7.048   | 812628 | 57114  | 49.779 |
| 2   | 11.410  | 819829 | 36328  | 50.221 |

### HPLC spectra of chiral 3d''

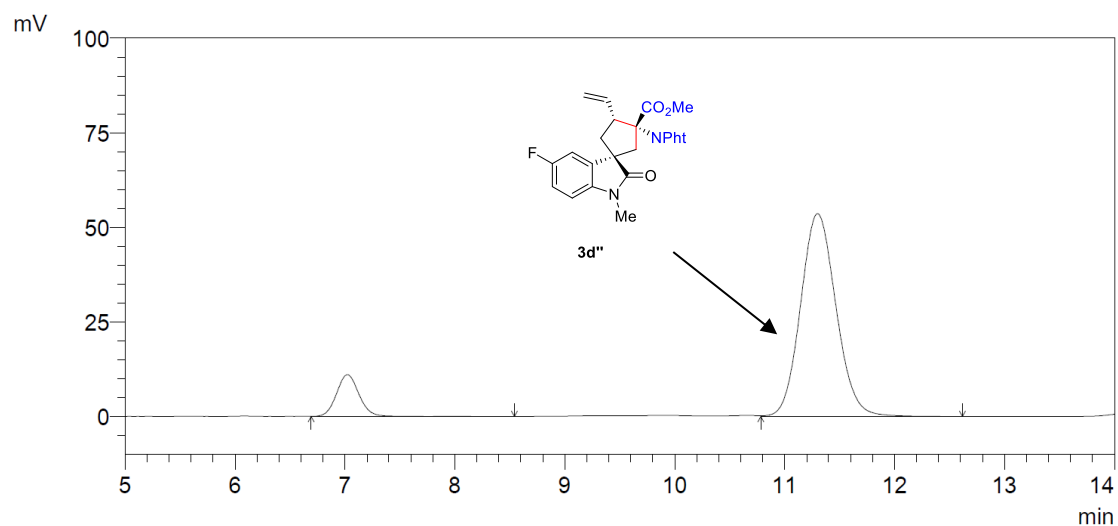

PDA 254nm

| ID# | Rt.Time | Area    | Height | Area%  |
|-----|---------|---------|--------|--------|
| 1   | 7.021   | 156692  | 11031  | 11.538 |
| 2   | 11.299  | 1201413 | 53658  | 88.462 |

**Chiral HPLC analysis:** Chiralcel AD-H, Hexane/*i*-PrOH = 85/15, flow rate 1.5 mL/min,  $\lambda = 254$  nm,  $t_{(1S,2R,4S)}\text{-3d''} = 7.0$  min (minor),  $t_{(1R,2S,4R)}\text{-3d''} = 11.4$  min (major).

### HPLC spectra of *rac*-3e

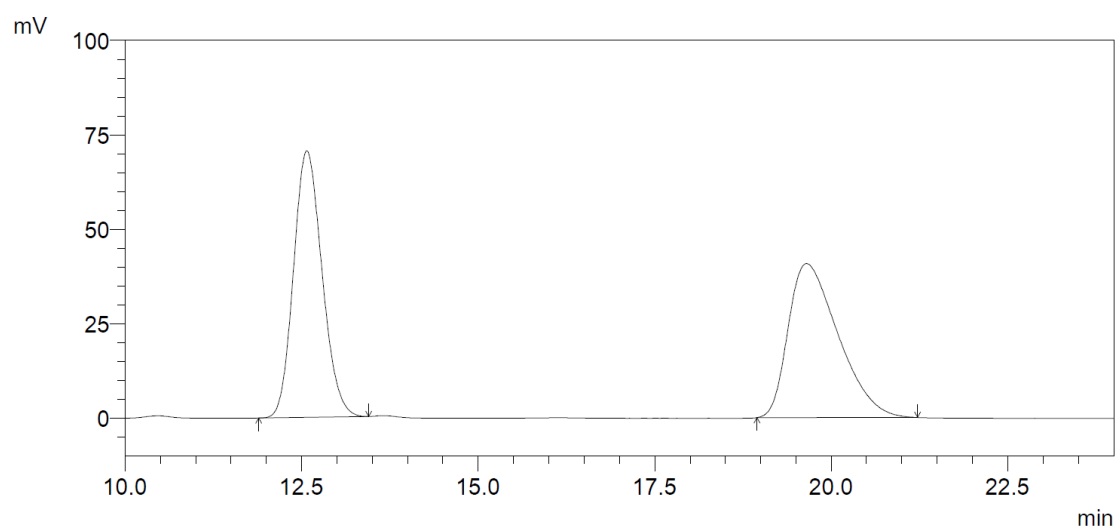

PDA 254nm

| ID# | Rt.Time | Area    | Height | Area%  |
|-----|---------|---------|--------|--------|
| 1   | 12.574  | 1986616 | 70594  | 49.804 |
| 2   | 19.651  | 2002217 | 40785  | 50.196 |

### HPLC spectra of chiral 3e

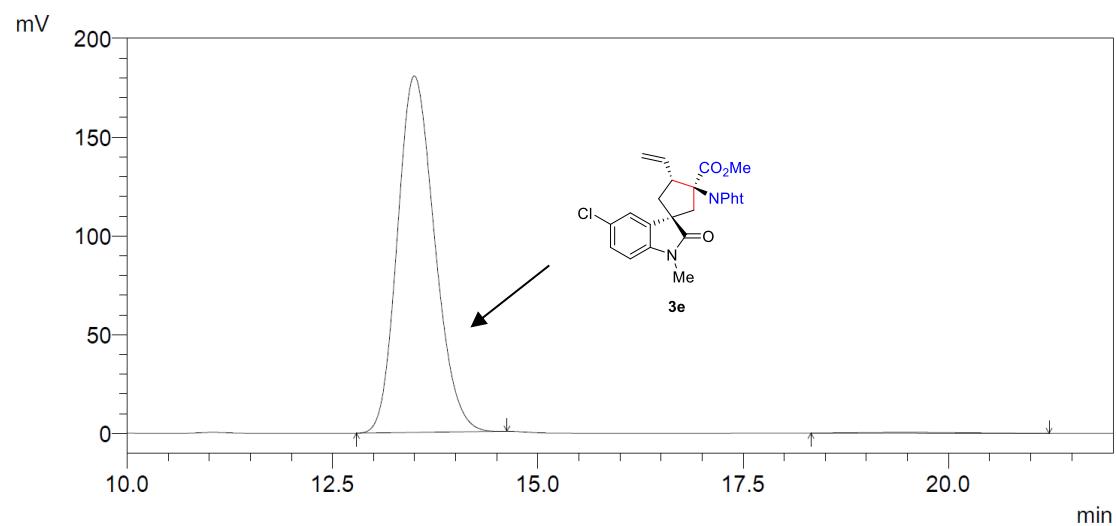

PDA 254nm

| ID# | Rt.Time | Area    | Height | Area%  |
|-----|---------|---------|--------|--------|
| 1   | 13.497  | 5688005 | 180607 | 99.316 |
| 2   | 19.500  | 39175   | 469    | 0.684  |

**Chiral HPLC analysis:** Chiralcel AD-H, Hexane/*i*-PrOH = 85/15, flow rate 1.5 mL/min,  $\lambda = 254$  nm,  $t_{(1S,2R,4R)}\text{-3e} = 12.6$  min (major),  $t_{(1R,2S,4S)}\text{-3e} = 19.7$  min (minor).

### HPLC spectra of *rac*-3e'

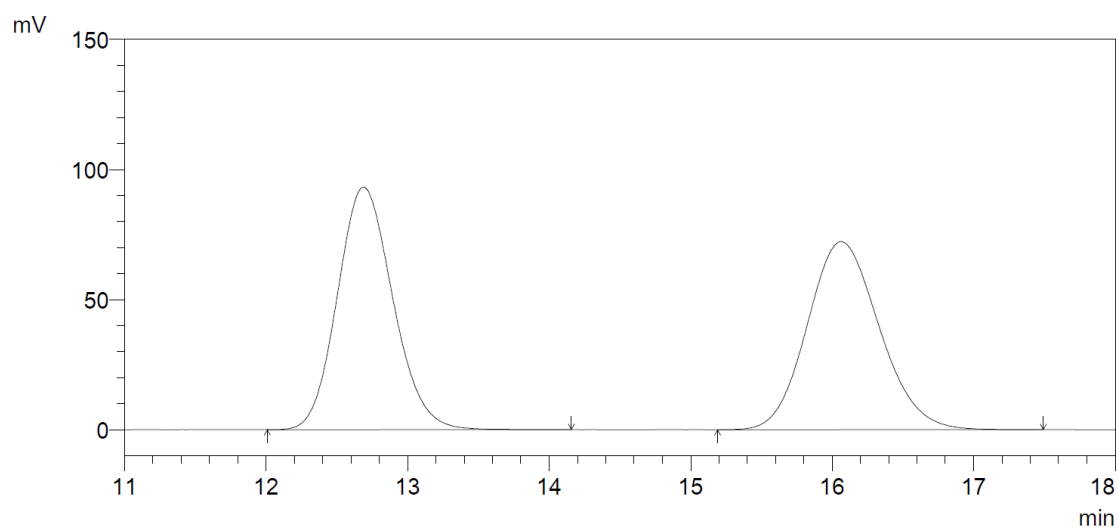

PDA 254nm

| ID# | Rt.Time | Area    | Height | Area%  |
|-----|---------|---------|--------|--------|
| 1   | 12.688  | 2543352 | 93284  | 49.834 |
| 2   | 16.063  | 2560288 | 72285  | 50.166 |

### HPLC spectra of chiral 3e'

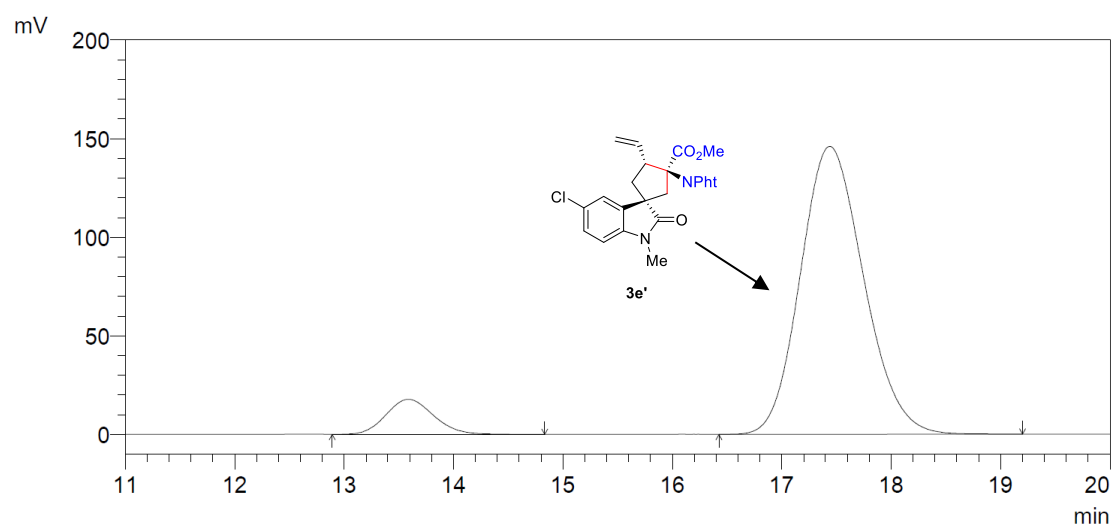

PDA 254nm

| ID# | Rt.Time | Area    | Height | Area%  |
|-----|---------|---------|--------|--------|
| 1   | 13.587  | 538838  | 17795  | 8.410  |
| 2   | 17.438  | 5868169 | 146043 | 91.590 |

**Chiral HPLC analysis:** Chiralcel AD-H, Hexane/*i*-PrOH = 85/15, flow rate 1.5 mL/min,  $\lambda = 254$  nm,  $t_{(1R,2R,4S)}\text{-}3e' = 10.6$  min (minor),  $t_{(1S,2S,4R)}\text{-}3e' = 14.2$  min (major).

### HPLC spectra of *rac-3e''*

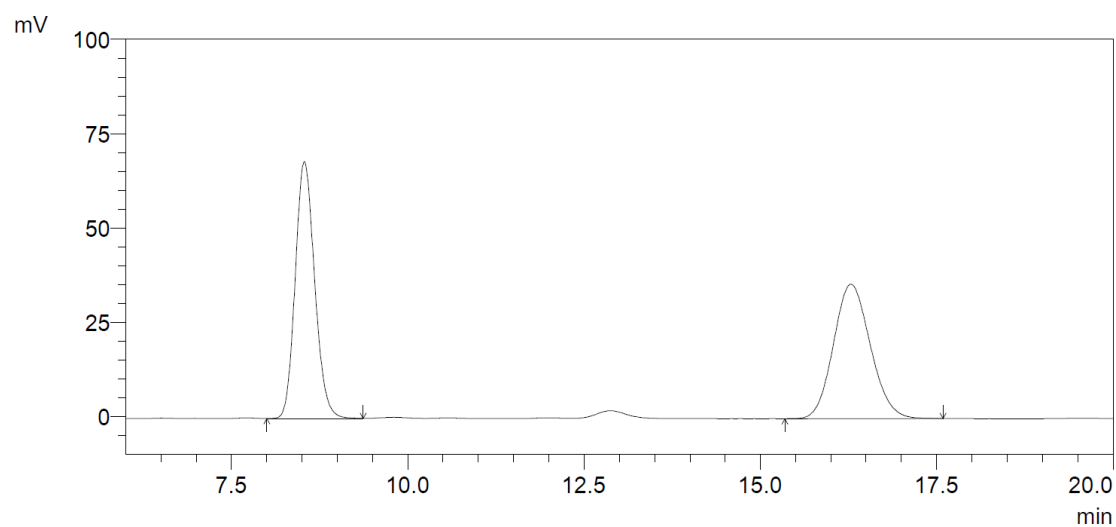

PDA 254nm

| ID# | Rt.Time | Area    | Height | Area%  |
|-----|---------|---------|--------|--------|
| 1   | 8.534   | 1307606 | 68150  | 50.211 |
| 2   | 16.285  | 1296624 | 35662  | 49.789 |

### HPLC spectra of chiral *3e''*

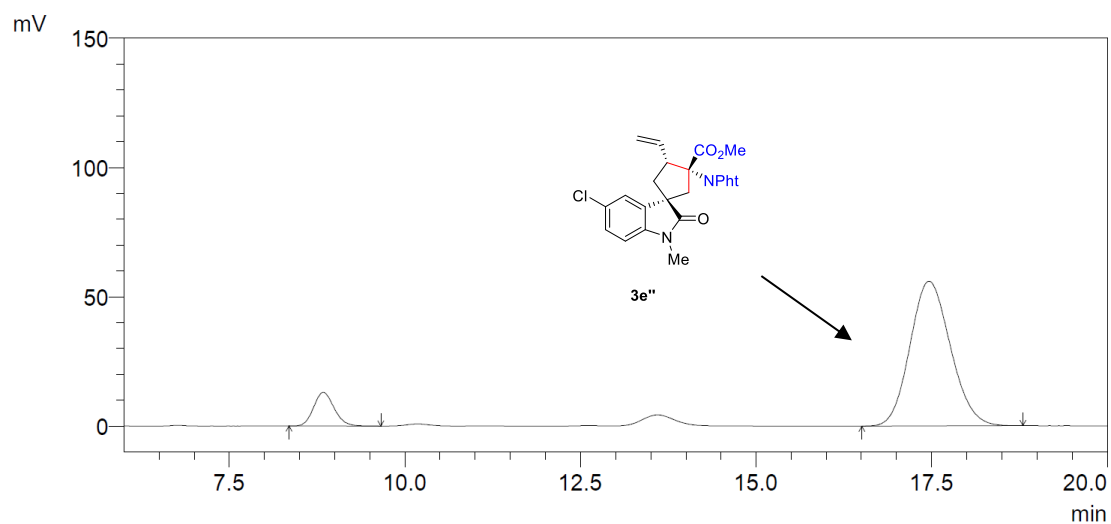

PDA 254nm

| ID# | Rt.Time | Area    | Height | Area%  |
|-----|---------|---------|--------|--------|
| 1   | 8.838   | 265223  | 13014  | 10.567 |
| 2   | 17.463  | 2244627 | 56018  | 89.433 |

**Chiral HPLC analysis:** Chiralcel AD-H, Hexane/*i*-PrOH = 85/15, flow rate 1.5 mL/min,  $\lambda = 254$  nm,  $t_{(1S,2R,4S)-3e''} = 8.5$  min (minor),  $t_{(1R,2S,4R)-3e''} = 16.3$  min (major).

### HPLC spectra of *rac*-3f

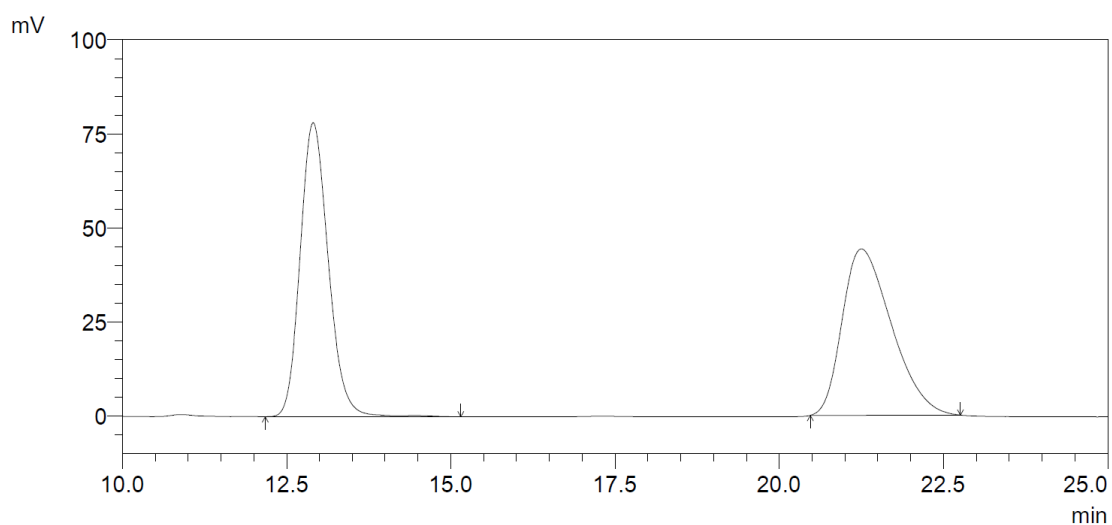

PDA 254nm

| ID# | Rt.Time | Area    | Height | Area%  |
|-----|---------|---------|--------|--------|
| 1   | 12.904  | 2329137 | 78171  | 50.237 |
| 2   | 21.252  | 2307155 | 44216  | 49.763 |

### HPLC spectra of chiral 3f

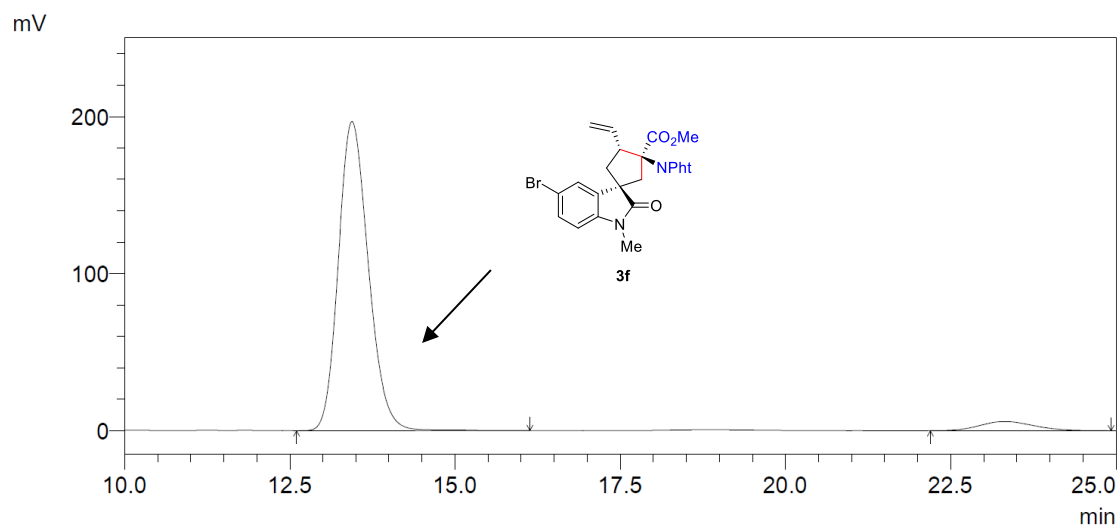

PDA 254nm

| ID# | Rt.Time | Area    | Height | Area%  |
|-----|---------|---------|--------|--------|
| 1   | 13.441  | 6225155 | 196880 | 94.888 |
| 2   | 23.316  | 335398  | 5841   | 5.112  |

**Chiral HPLC analysis:** Chiralcel AD-H, Hexane/*i*-PrOH = 85/15, flow rate 1.5 mL/min,  $\lambda = 254$  nm,  $t_{(1S,2R,4R)}\text{-3f} = 12.9$  min (major),  $t_{(1R,2S,4S)}\text{-3f} = 21.3$  min (minor).

### HPLC spectra of *rac*-3f

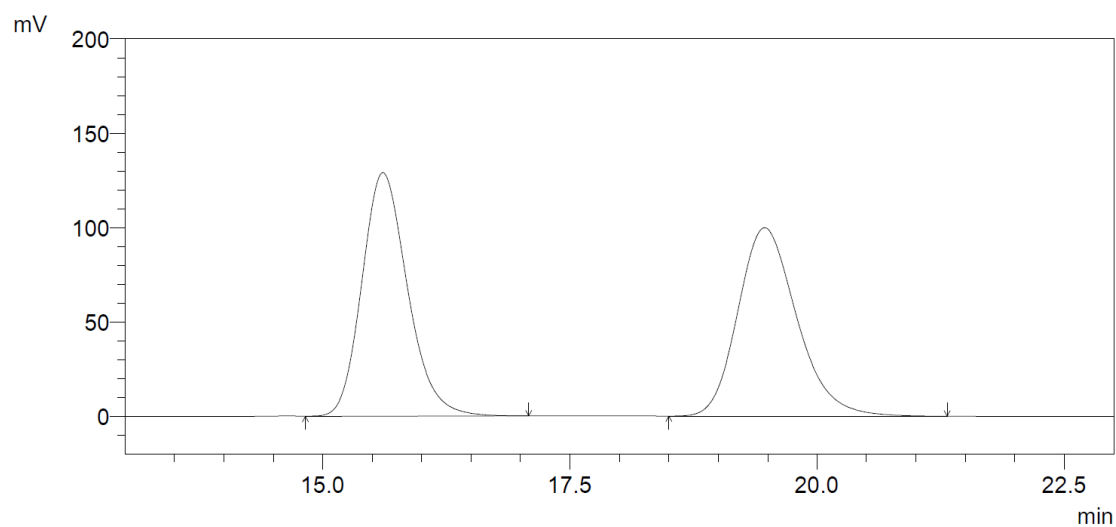

PDA 254nm

| ID# | Rt.Time | Area    | Height | Area%  |
|-----|---------|---------|--------|--------|
| 1   | 15.608  | 4146267 | 129164 | 50.069 |
| 2   | 19.469  | 4134834 | 99854  | 49.931 |

### HPLC spectra of chiral 3f

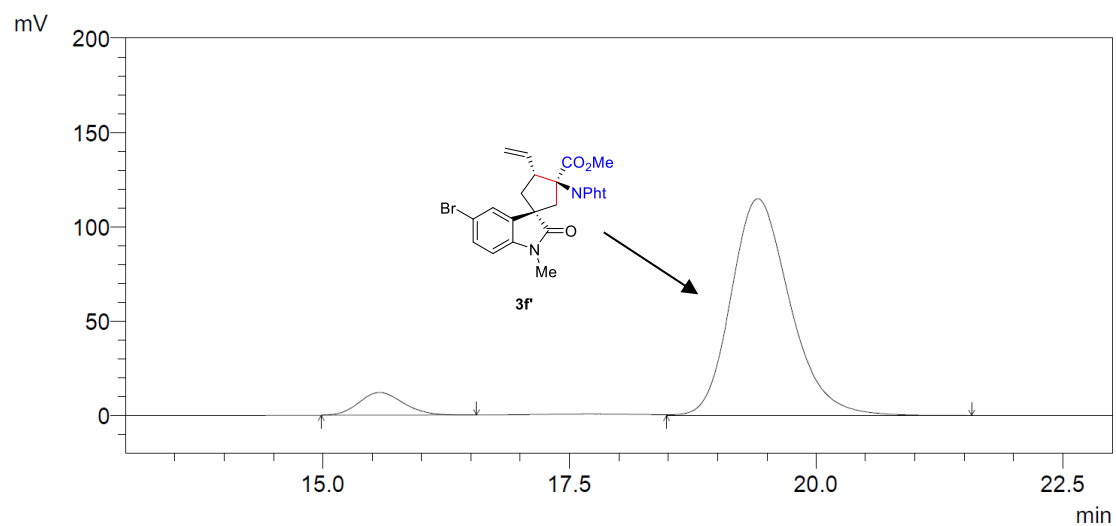

PDA 254nm

| ID# | Rt.Time | Area    | Height | Area%  |
|-----|---------|---------|--------|--------|
| 1   | 15.575  | 372339  | 12011  | 7.252  |
| 2   | 19.407  | 4762024 | 114921 | 92.748 |

**Chiral HPLC analysis:** Chiralcel AD-H, Hexane/*i*-PrOH = 85/15, flow rate 1.5 mL/min,  $\lambda = 254$  nm,  $t_{(1R,2R,4S)}$ -3f = 15.6 min (minor),  $t_{(1S,2S,4R)}$ -3f = 19.5 min (major).

### HPLC spectra of *rac*-3f'

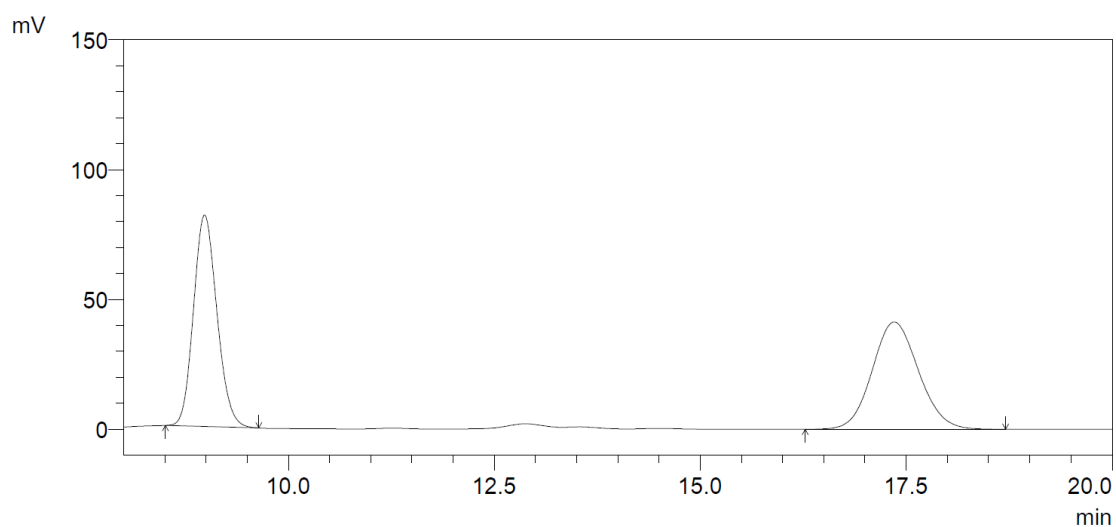

PDA 254nm

| ID# | Rt.Time | Area    | Height | Area%  |
|-----|---------|---------|--------|--------|
| 1   | 8.982   | 1614396 | 81533  | 49.907 |
| 2   | 17.354  | 1620414 | 41356  | 50.093 |

### HPLC spectra of chiral 3f'

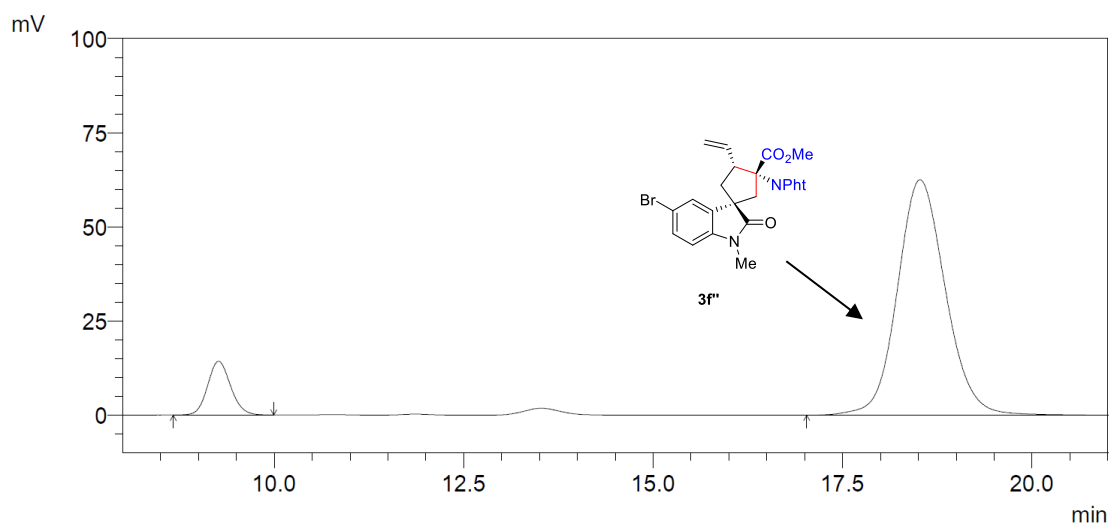

PDA 254nm

| ID# | Rt.Time | Area    | Height | Area%  |
|-----|---------|---------|--------|--------|
| 1   | 9.264   | 304123  | 14316  | 9.926  |
| 2   | 18.520  | 2759704 | 62563  | 90.074 |

**Chiral HPLC analysis:** Chiralcel AD-H, Hexane/*i*-PrOH = 85/15, flow rate 1.5 mL/min,  $\lambda = 254$  nm,  $t_{(1S,2R,4S)}$ -3f' = 9.0 min (minor),  $t_{(1R,2S,4R)}$ -3f' = 17.4 min (major).

### HPLC spectra of *rac*-3g

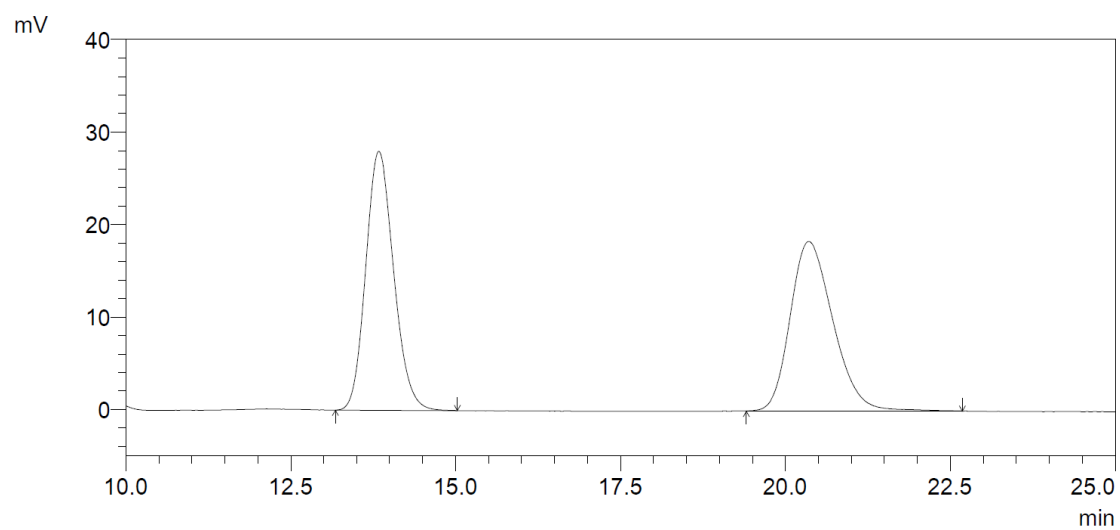

PDA 254nm

| ID# | Rt.Time | Area   | Height | Area%  |
|-----|---------|--------|--------|--------|
| 1   | 13.833  | 826473 | 28015  | 49.877 |
| 2   | 20.352  | 830549 | 18354  | 50.123 |

### HPLC spectra of chiral 3g

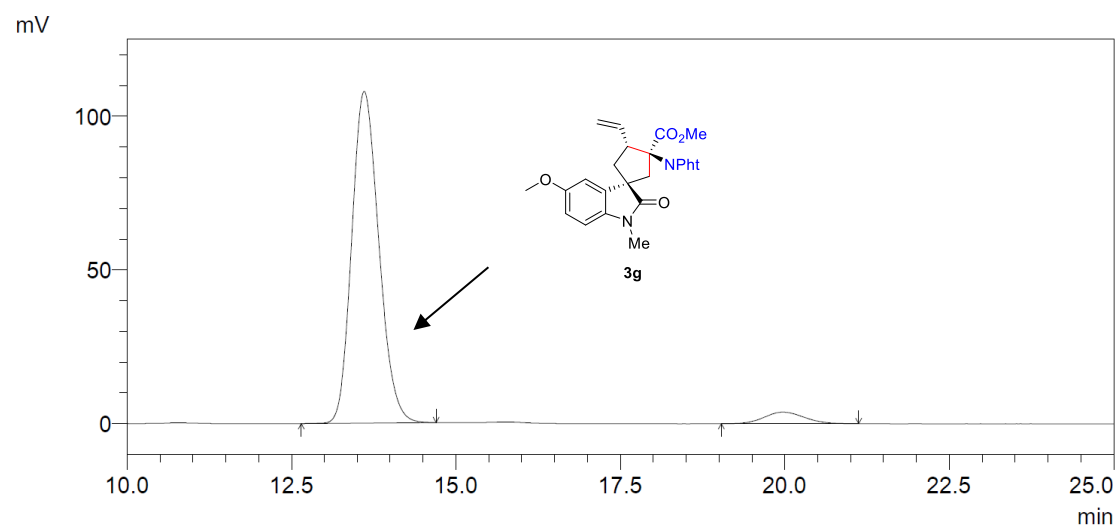

PDA 254nm

| ID# | Rt.Time | Area    | Height | Area%  |
|-----|---------|---------|--------|--------|
| 1   | 13.605  | 3086714 | 107944 | 95.023 |
| 2   | 19.970  | 161671  | 3779   | 4.977  |

**Chiral HPLC analysis:** Chiralcel AD-H, Hexane/*i*-PrOH = 85/15, flow rate 1.5 mL/min,  $\lambda = 254$  nm,  $t_{(1S,2R,4R)\text{-}3g} = 13.8$  min (major),  $t_{(1R,2S,4S)\text{-}3g} = 20.4$  min (minor).

### HPLC spectra of *rac*-3g'

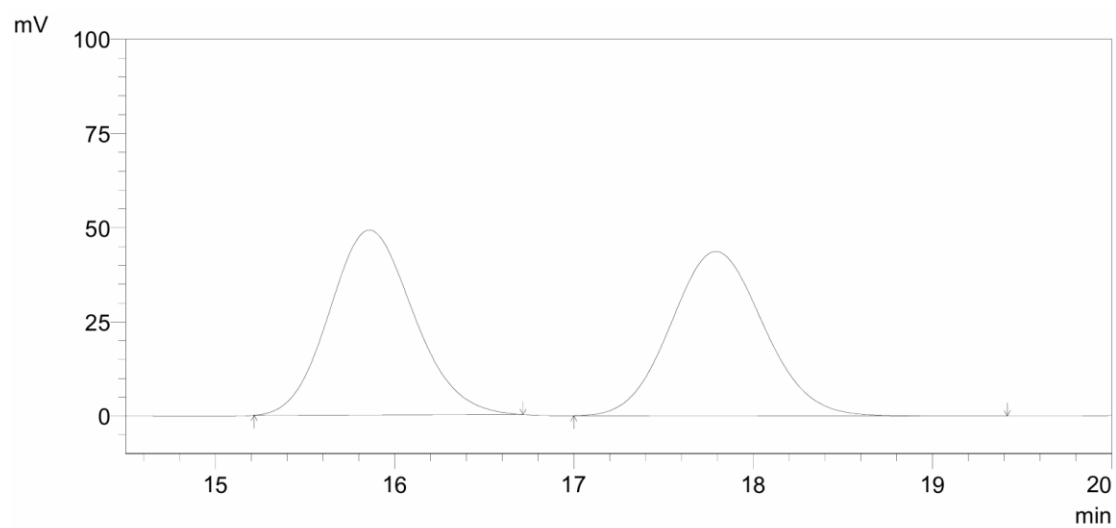

PDA 254nm

| ID# | Rt.Time | Area    | Height | Area%  |
|-----|---------|---------|--------|--------|
| 1   | 15.860  | 1606284 | 49098  | 50.545 |
| 2   | 17.791  | 1571643 | 43641  | 49.455 |

### HPLC spectra of chiral 3g'

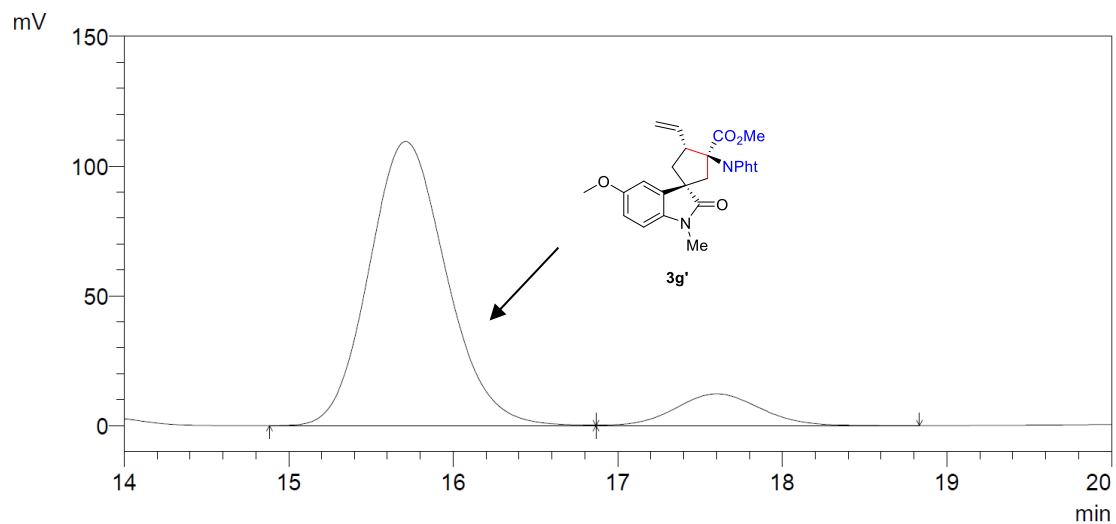

PDA 254nm

| ID# | Rt.Time | Area    | Height | Area%  |
|-----|---------|---------|--------|--------|
| 1   | 15.710  | 3574622 | 109594 | 89.108 |
| 2   | 17.602  | 436928  | 12236  | 10.892 |

**Chiral HPLC analysis:** Chiralcel AD-H, Hexane/*i*-PrOH = 85/15, flow rate 1.5 mL/min,  $\lambda = 254$  nm,  $t_{(1R,2R,4S)}$ -3g' = 15.9 min (major),  $t_{(1S,2S,4R)}$ -3g' = 17.8 min (minor).

### HPLC spectra of *rac*-3g''

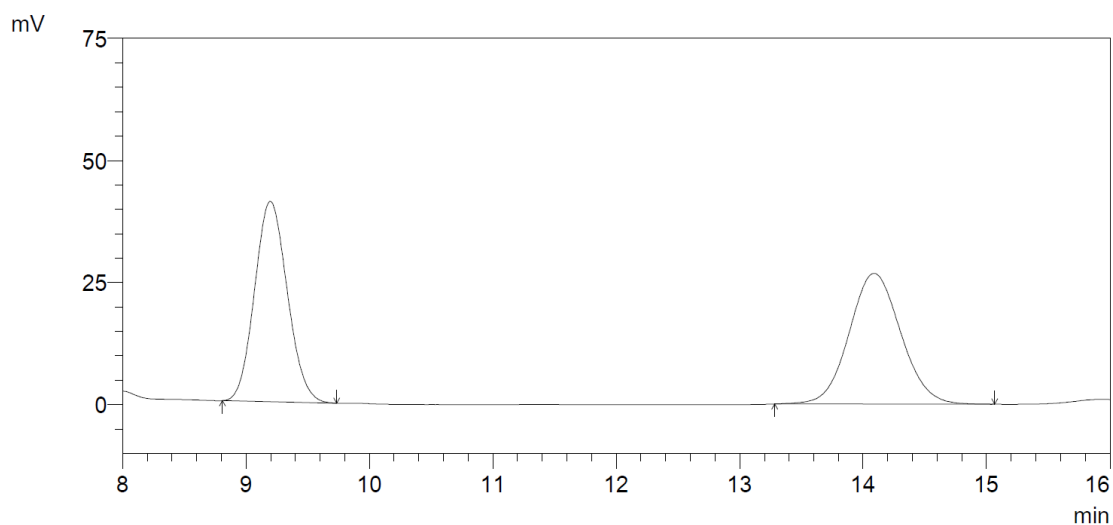

PDA 254nm

| ID# | Rt.Time | Area   | Height | Area%  |
|-----|---------|--------|--------|--------|
| 1   | 9.196   | 757193 | 41045  | 49.280 |
| 2   | 14.089  | 779303 | 26806  | 50.720 |

### HPLC spectra of chiral 3g''

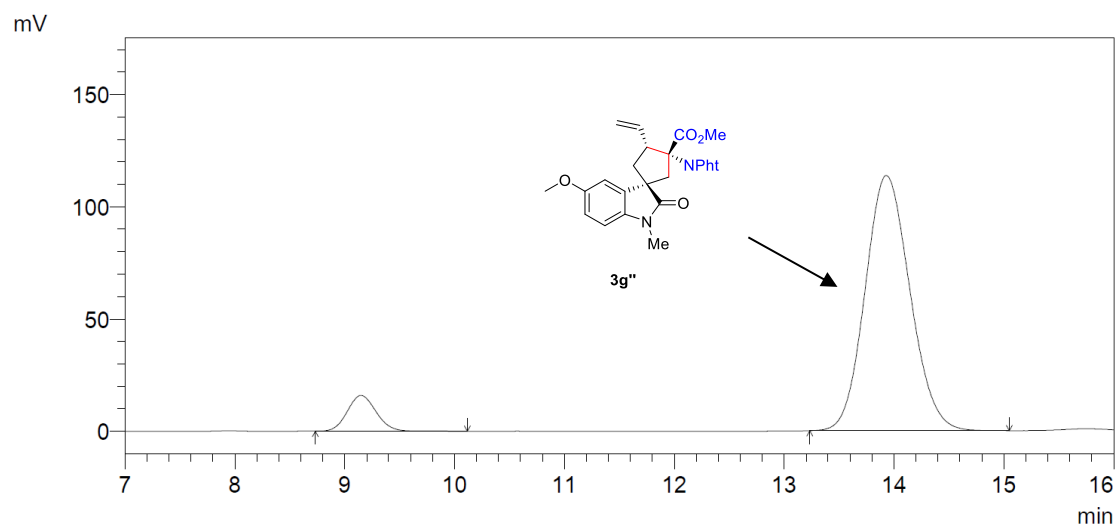

PDA 254nm

| ID# | Rt.Time | Area    | Height | Area%  |
|-----|---------|---------|--------|--------|
| 1   | 9.148   | 292073  | 15951  | 8.305  |
| 2   | 13.930  | 3224742 | 113592 | 91.695 |

**Chiral HPLC analysis:** Chiralcel AD-H, Hexane/*i*-PrOH = 85/15, flow rate 1.5 mL/min,  $\lambda = 254$  nm,  $t_{(1S,2R,4S)}$ -3g'' = 9.2 min (minor),  $t_{(1R,2S,4R)}$ -3g'' = 14.1 min (major).

### HPLC spectra of *rac*-3h

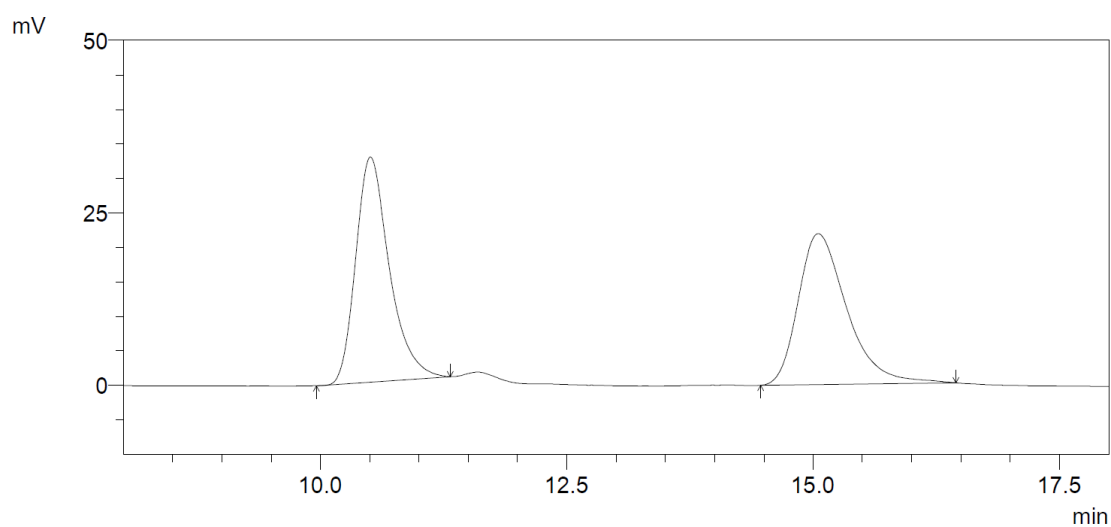

PDA 254nm

| ID# | Rt.Time | Area   | Height | Area%  |
|-----|---------|--------|--------|--------|
| 1   | 10.506  | 774390 | 32635  | 50.792 |
| 2   | 15.053  | 750239 | 21883  | 49.208 |

### HPLC spectra of chiral 3h

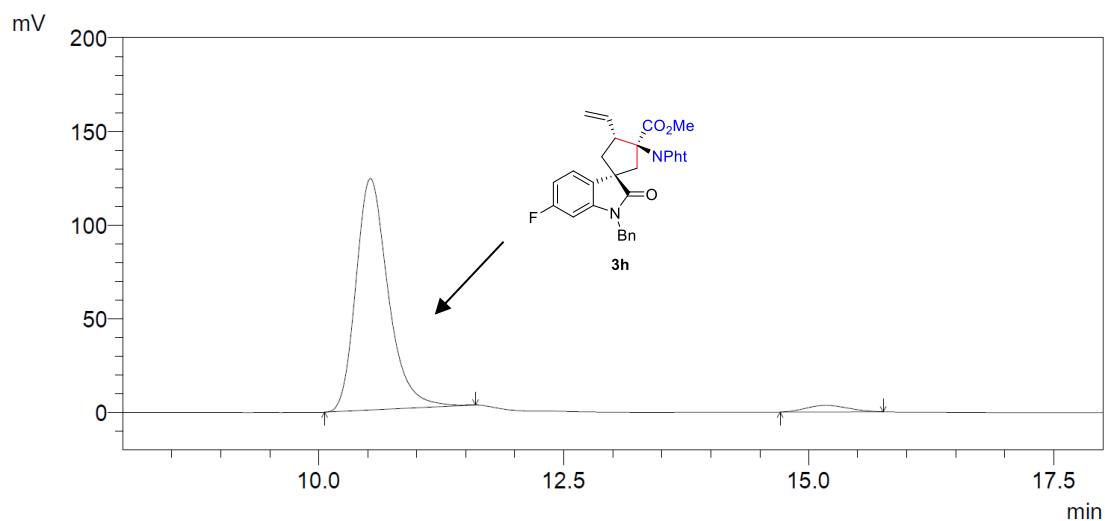

PDA 254nm

| ID# | Rt.Time | Area    | Height | Area%  |
|-----|---------|---------|--------|--------|
| 1   | 10.525  | 2837374 | 123630 | 96.485 |
| 2   | 15.174  | 103359  | 3471   | 3.515  |

**Chiral HPLC analysis:** Chiralcel AD-H, Hexane/*i*-PrOH = 85/15, flow rate 1.5 mL/min,  $\lambda = 254$  nm,  $t_{(1S,2R,4R)\text{-}3h} = 10.5$  min (major),  $t_{(1R,2S,4S)\text{-}3h} = 15.1$  min (minor).

### HPLC spectra of *rac*-3h'

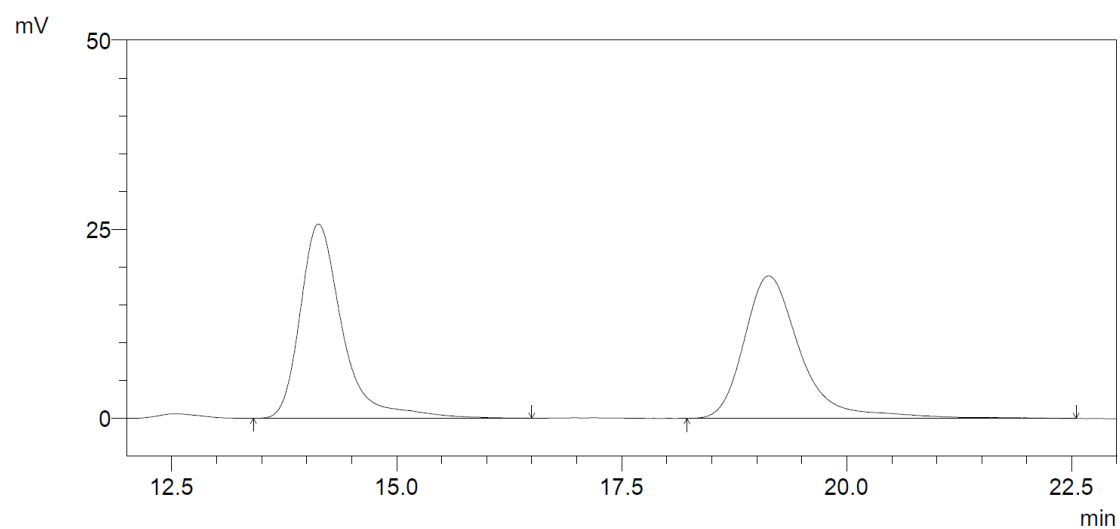

PDA 254nm

| ID# | Rt.Time | Area   | Height | Area%  |
|-----|---------|--------|--------|--------|
| 1   | 14.130  | 838701 | 25706  | 50.385 |
| 2   | 19.133  | 825896 | 18886  | 49.615 |

### HPLC spectra of chiral 3h'

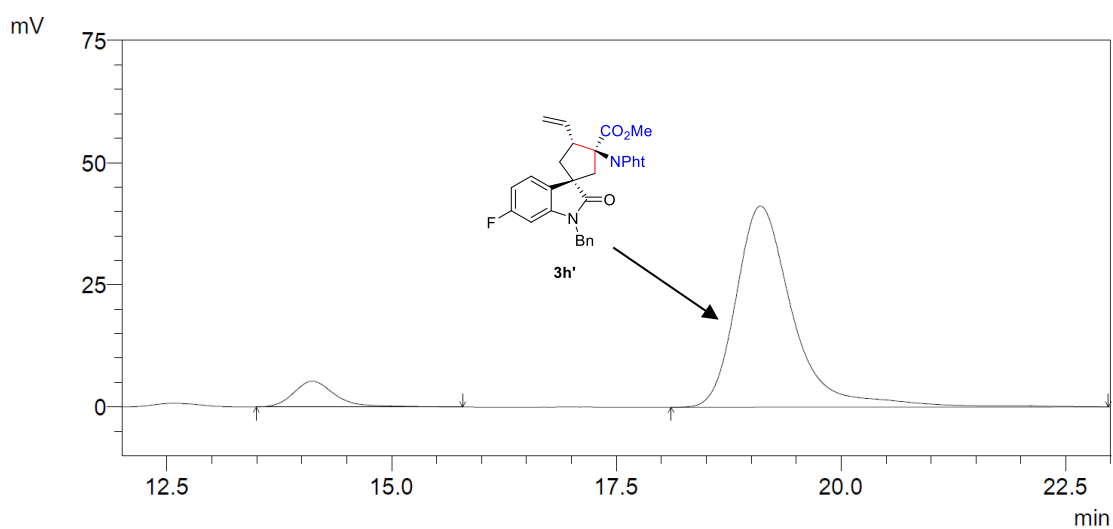

PDA 254nm

| ID# | Rt.Time | Area    | Height | Area%  |
|-----|---------|---------|--------|--------|
| 1   | 14.118  | 173009  | 5306   | 8.711  |
| 2   | 19.104  | 1813176 | 41186  | 91.289 |

**Chiral HPLC analysis:** Chiralcel AD-H, Hexane/*i*-PrOH = 85/15, flow rate 1.5 mL/min,  $\lambda = 254$  nm,  $t_{(1R,2R,4S)}\text{-3h}' = 14.1$  min (minor),  $t_{(1S,2S,4R)}\text{-3h}' = 19.1$  min (major).

### HPLC spectra of *rac*-3h''

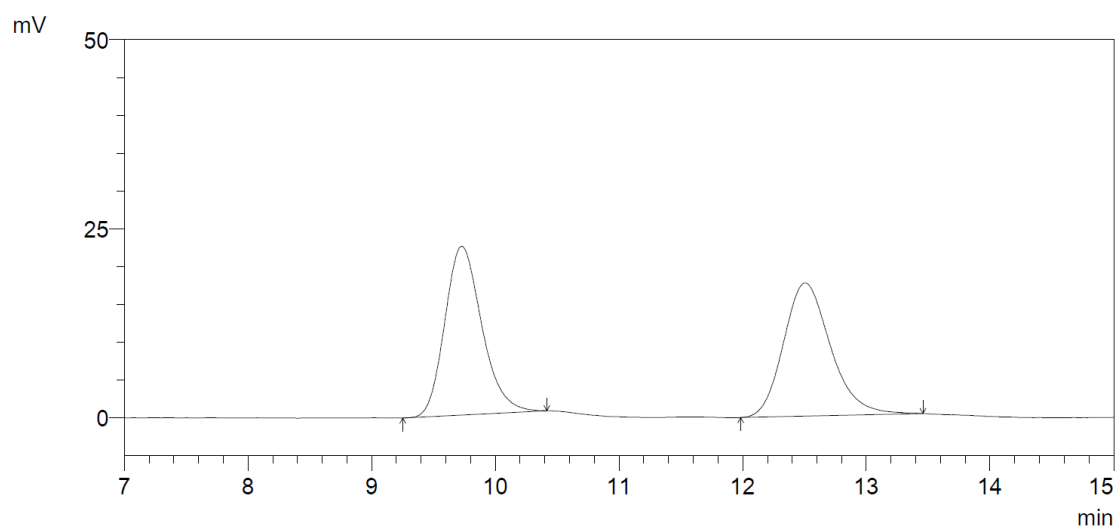

PDA 254nm

| ID# | Rt.Time | Area   | Height | Area%  |
|-----|---------|--------|--------|--------|
| 1   | 9.728   | 464821 | 22331  | 49.942 |
| 2   | 12.505  | 465894 | 17630  | 50.058 |

### HPLC spectra of chiral 3h''

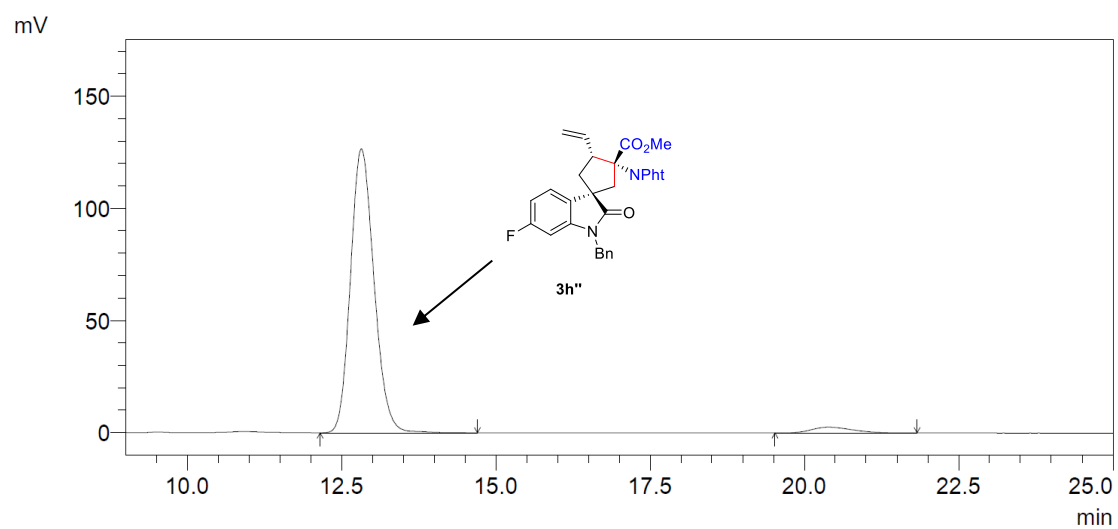

PDA 254nm

| ID# | Rt.Time | Area    | Height | Area%  |
|-----|---------|---------|--------|--------|
| 1   | 12.820  | 3359859 | 126509 | 96.535 |
| 2   | 20.396  | 120580  | 2604   | 3.465  |

**Chiral HPLC analysis:** Chiralcel AD-H, Hexane/*i*-PrOH = 85/15, flow rate 1.5 mL/min,  $\lambda = 254$  nm,  $t_{(1S,2R,4S)}$ -3h'' = 9.7 min (minor),  $t_{(1R,2S,4R)}$ -3h'' = 12.5 min (major).

### HPLC spectra of *rac*-3i

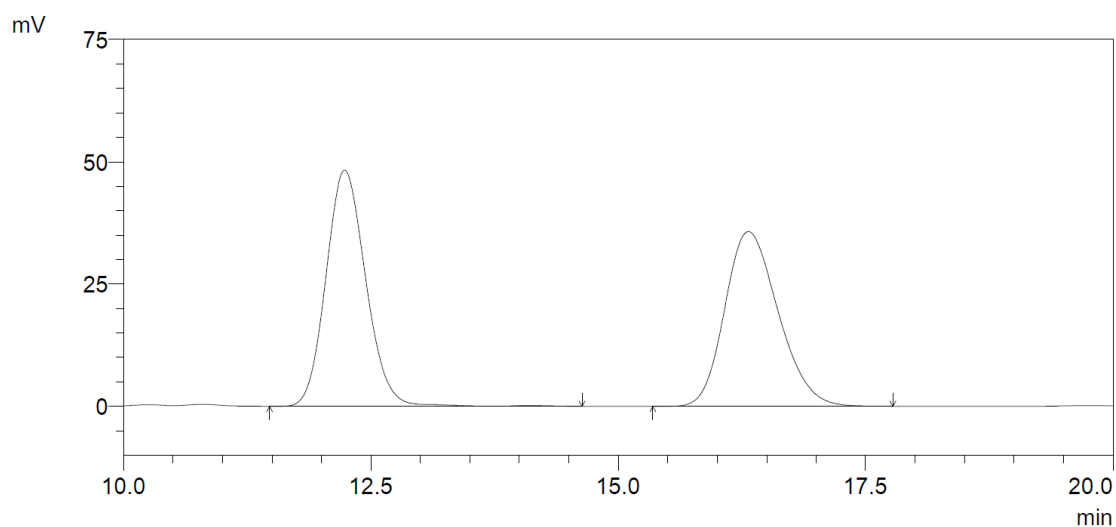

PDA 254nm

| ID# | Rt.Time | Area    | Height | Area%  |
|-----|---------|---------|--------|--------|
| 1   | 12.234  | 1356439 | 48298  | 50.250 |
| 2   | 16.315  | 1342943 | 35765  | 49.750 |

### HPLC spectra of chiral 3i

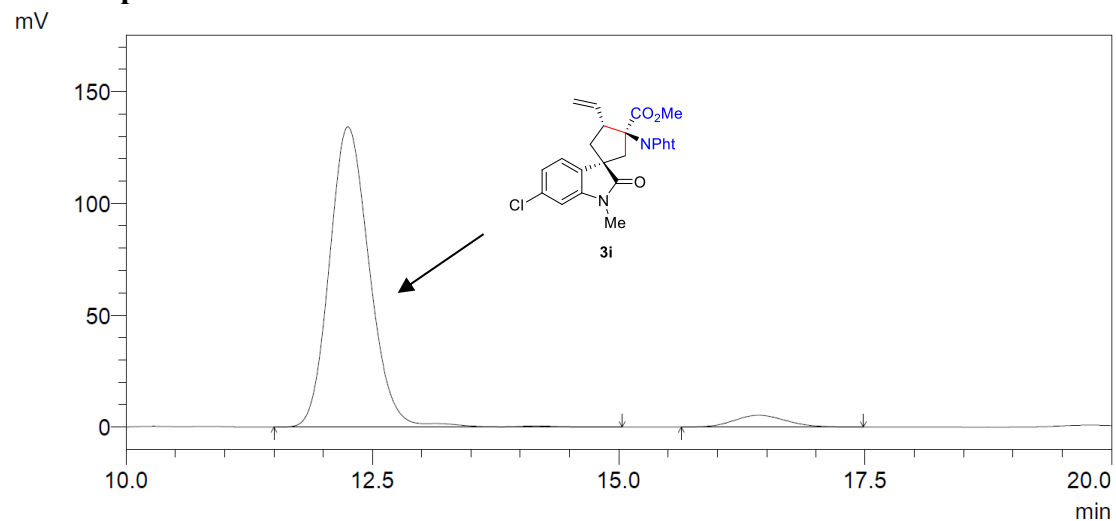

PDA 254nm

| ID# | Rt.Time | Area    | Height | Area%  |
|-----|---------|---------|--------|--------|
| 1   | 12.251  | 3794431 | 134294 | 95.096 |
| 2   | 16.420  | 195675  | 5310   | 4.904  |

**Chiral HPLC analysis:** Chiralcel AD-H, Hexane/*i*-PrOH = 85/15, flow rate 1.5 mL/min,  $\lambda = 254$  nm,  $t_{(1S,2R,4R)}$ -3i = 12.2 min (major),  $t_{(1R,2S,4S)}$ -3i = 16.3 min (minor).

### HPLC spectra of *rac*-3i'

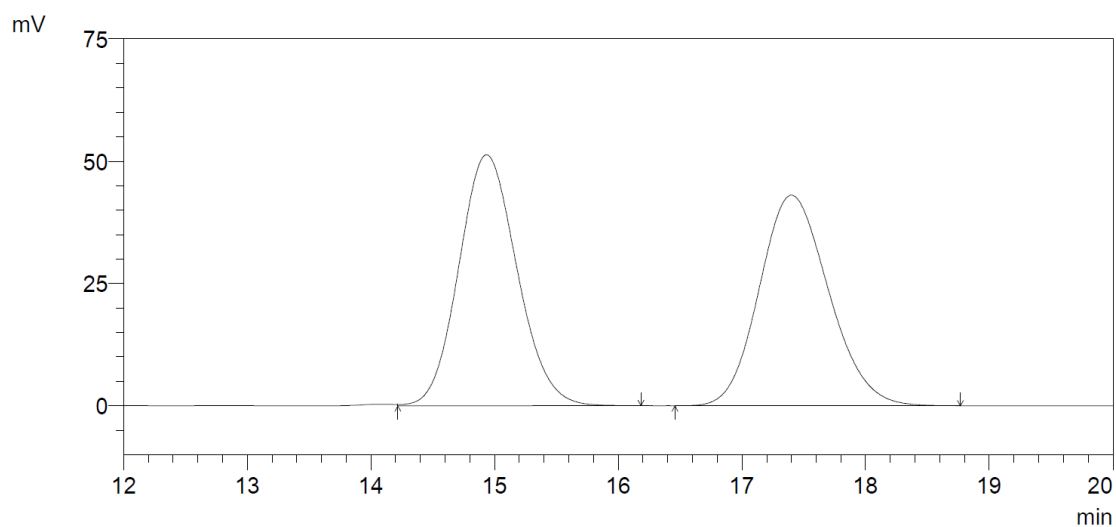

PDA 254nm

| ID# | Rt.Time | Area    | Height | Area%  |
|-----|---------|---------|--------|--------|
| 1   | 14.934  | 1681280 | 51331  | 50.024 |
| 2   | 17.400  | 1679686 | 43067  | 49.976 |

### HPLC spectra of chiral 3i'

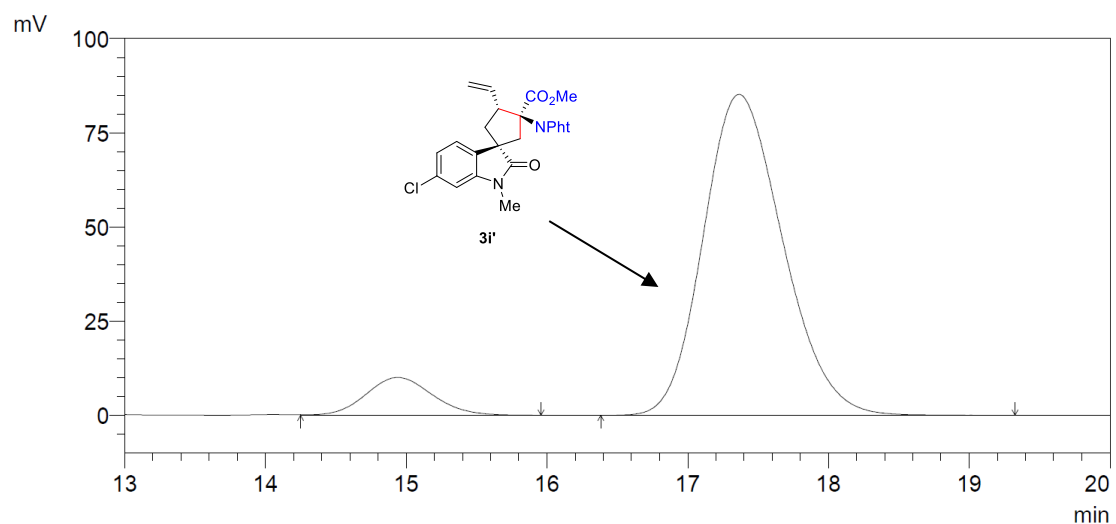

PDA 254nm

| ID# | Rt.Time | Area    | Height | Area%  |
|-----|---------|---------|--------|--------|
| 1   | 14.940  | 328613  | 10028  | 8.937  |
| 2   | 17.365  | 3348542 | 85205  | 91.063 |

**Chiral HPLC analysis:** Chiralcel AD-H, Hexane/*i*-PrOH = 85/15, flow rate 1.5 mL/min,  $\lambda = 254$  nm,  $t_{(1R,2R,4S)}\text{-3i}' = 14.9$  min (minor),  $t_{(1S,2S,4R)}\text{-3i}' = 17.4$  min (major).

### HPLC spectra of *rac*-3i''

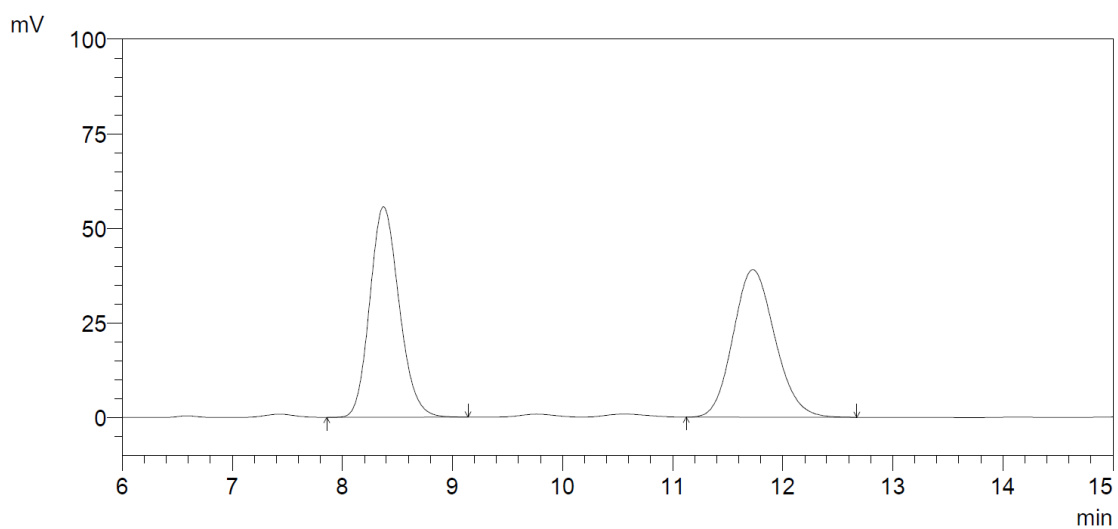

PDA 254nm

| ID# | Rt.Time | Area    | Height | Area%  |
|-----|---------|---------|--------|--------|
| 1   | 8.373   | 1034851 | 55661  | 50.083 |
| 2   | 11.729  | 1031406 | 39029  | 49.917 |

### HPLC spectra of chiral 3i''

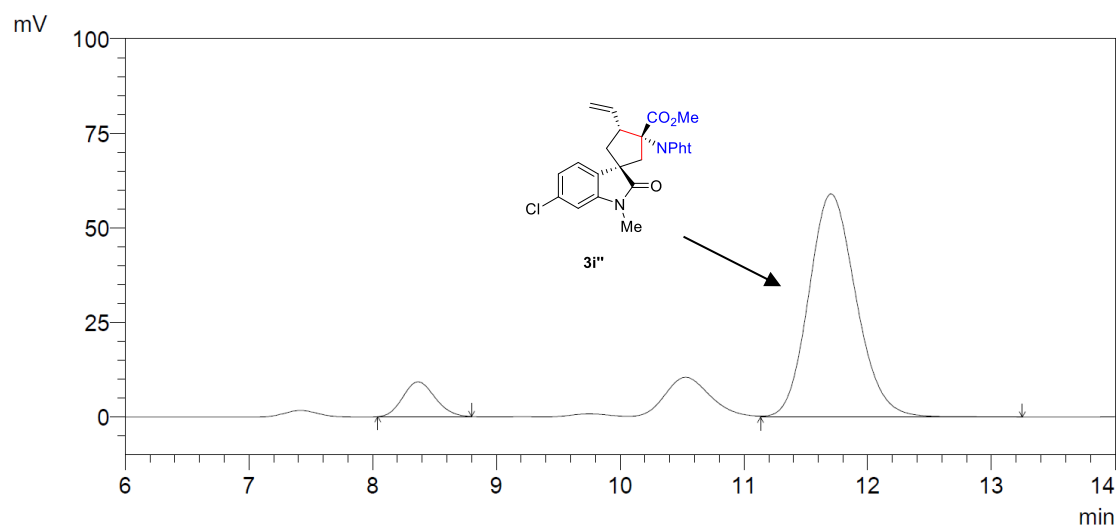

PDA 254nm

| ID# | Rt.Time | Area    | Height | Area%  |
|-----|---------|---------|--------|--------|
| 1   | 8.366   | 166136  | 9210   | 9.579  |
| 2   | 11.704  | 1568240 | 59011  | 90.421 |

**Chiral HPLC analysis:** Chiralcel AD-H, Hexane/*i*-PrOH = 85/15, flow rate 1.5 mL/min,  $\lambda = 254$  nm,  $t_{(1S,2R,4S)}$ -3i'' = 8.4 min (minor),  $t_{(1R,2S,4R)}$ -3i'' = 11.7 min (major).

### HPLC spectra of *rac*-3j

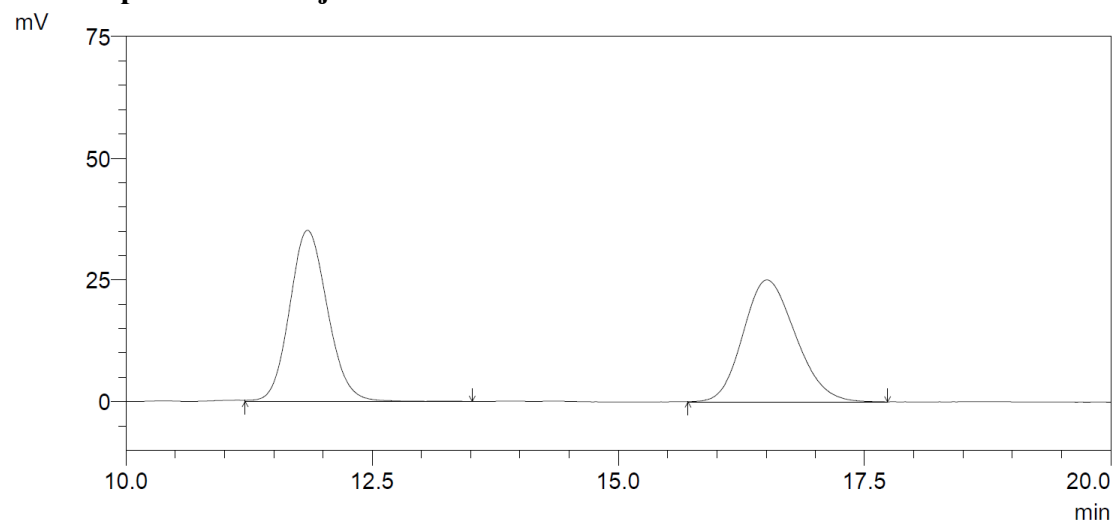

PDA 254nm

| ID# | Rt.Time | Area   | Height | Area%  |
|-----|---------|--------|--------|--------|
| 1   | 11.843  | 942874 | 35171  | 50.332 |
| 2   | 16.509  | 930436 | 25075  | 49.668 |

### HPLC spectra of chiral 3j

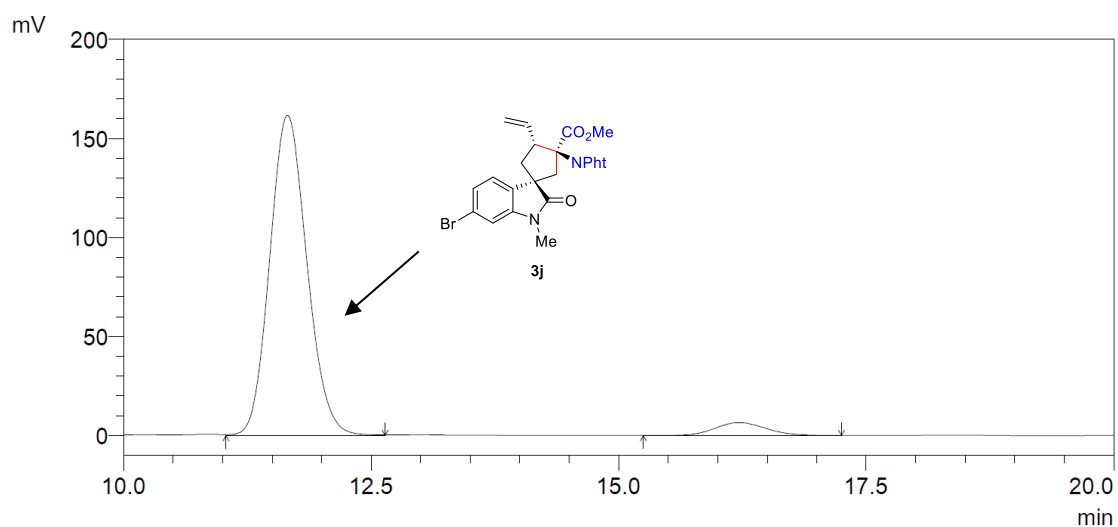

PDA 254nm

| ID# | Rt.Time | Area    | Height | Area%  |
|-----|---------|---------|--------|--------|
| 1   | 11.653  | 4224331 | 161716 | 94.715 |
| 2   | 16.217  | 235693  | 6533   | 5.285  |

**Chiral HPLC analysis:** Chiralcel AD-H, Hexane/*i*-PrOH = 85/15, flow rate 1.5 mL/min,  $\lambda = 254$  nm,  $t_{(1S,2R,4R)}$ -3j = 11.8 min (major),  $t_{(1R,2S,4S)}$ -3j = 16.5 min (minor).

### HPLC spectra of *rac*-3j'

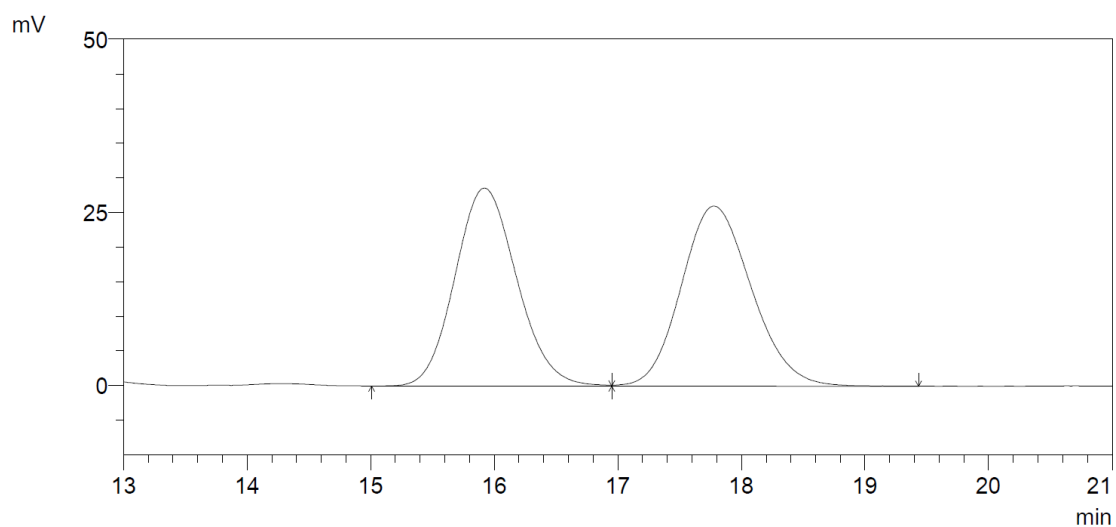

PDA 254nm

| ID# | Rt.Time | Area    | Height | Area%  |
|-----|---------|---------|--------|--------|
| 1   | 15.920  | 994574  | 28595  | 49.175 |
| 2   | 17.778  | 1027958 | 26005  | 50.825 |

### HPLC spectra of chiral 3j'

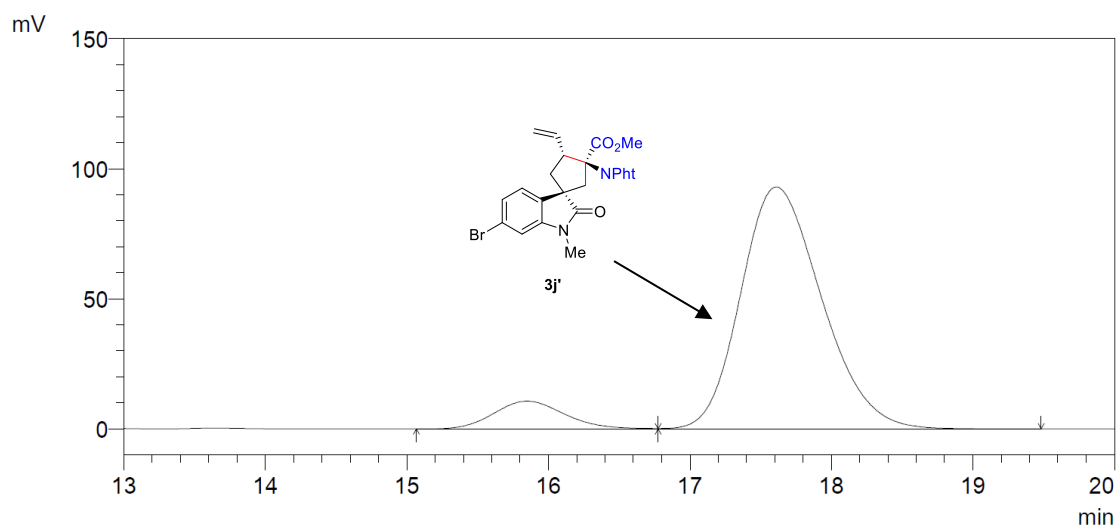

PDA 254nm

| ID# | Rt.Time | Area    | Height | Area%  |
|-----|---------|---------|--------|--------|
| 1   | 15.849  | 374903  | 10694  | 9.204  |
| 2   | 17.611  | 3698470 | 93105  | 90.796 |

**Chiral HPLC analysis:** Chiralcel AD-H, Hexane/*i*-PrOH = 85/15, flow rate 1.5 mL/min,  $\lambda = 254$  nm,  $t_{(1R,2R,4S)}$ -3j' = 15.9 min (minor),  $t_{(1S,2S,4R)}$ -3j' = 17.8 min (major).

### HPLC spectra of *rac*-3j''

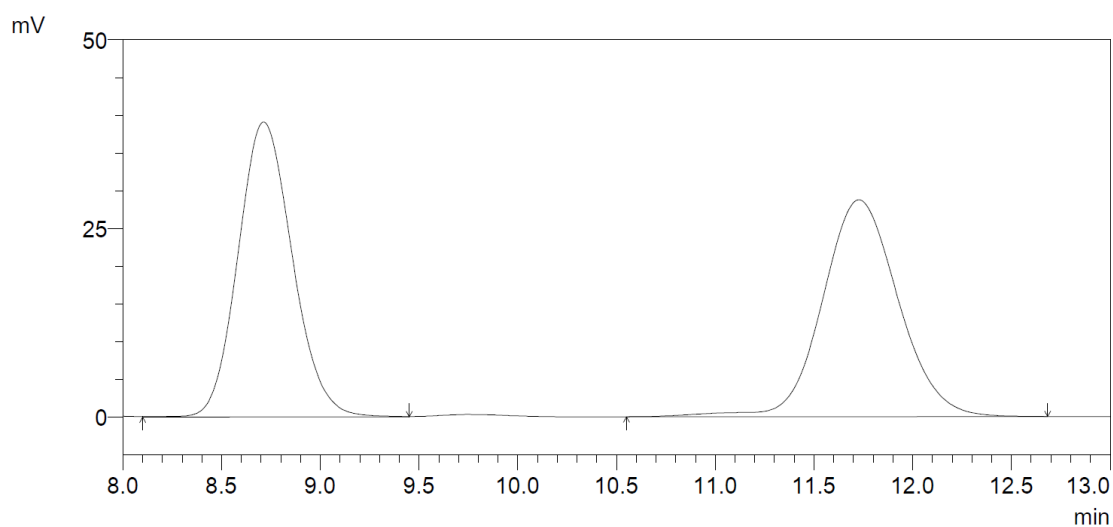

PDA 254nm

| ID# | Rt.Time | Area   | Height | Area%  |
|-----|---------|--------|--------|--------|
| 1   | 8.713   | 749872 | 39107  | 49.361 |
| 2   | 11.728  | 769299 | 28743  | 50.639 |

### HPLC spectra of chiral 3j''

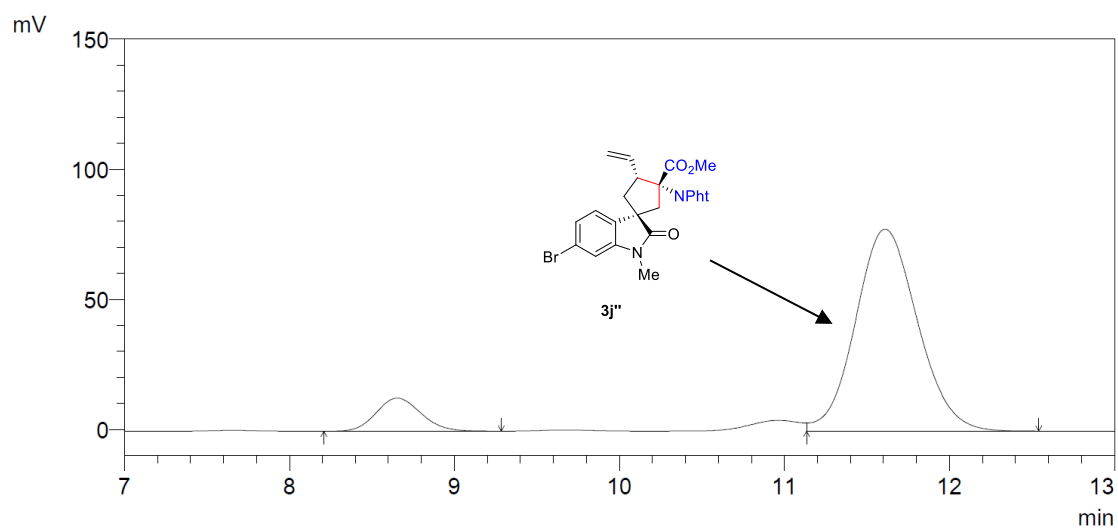

PDA 254nm

| ID# | Rt.Time | Area    | Height | Area%  |
|-----|---------|---------|--------|--------|
| 1   | 8.653   | 239939  | 12718  | 10.585 |
| 2   | 11.609  | 2026950 | 77705  | 89.415 |

**Chiral HPLC analysis:** Chiralcel AD-H, Hexane/*i*-PrOH = 85/15, flow rate 1.5 mL/min,  $\lambda = 254$  nm,  $t_{(1S,2R,4S)}$ -3j'' = 8.7 min (minor),  $t_{(1R,2S,4R)}$ -3j'' = 11.7 min (major).

### HPLC spectra of *rac*-3k

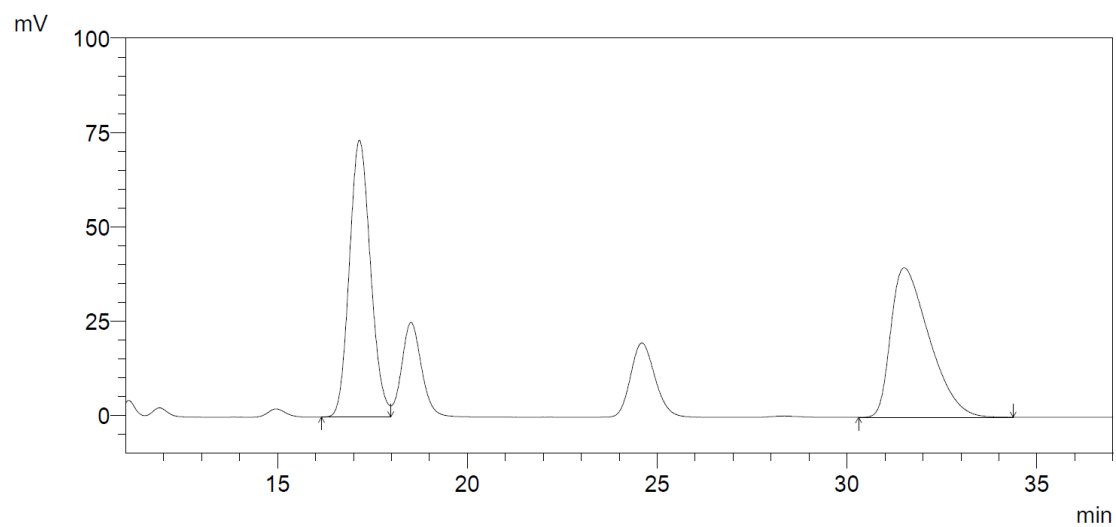

PDA 254nm

| ID# | Rt.Time | Area    | Height | Area%  |
|-----|---------|---------|--------|--------|
| 1   | 17.156  | 2848616 | 73438  | 50.543 |
| 2   | 31.504  | 2787390 | 39667  | 49.457 |

### HPLC spectra of chiral 3k

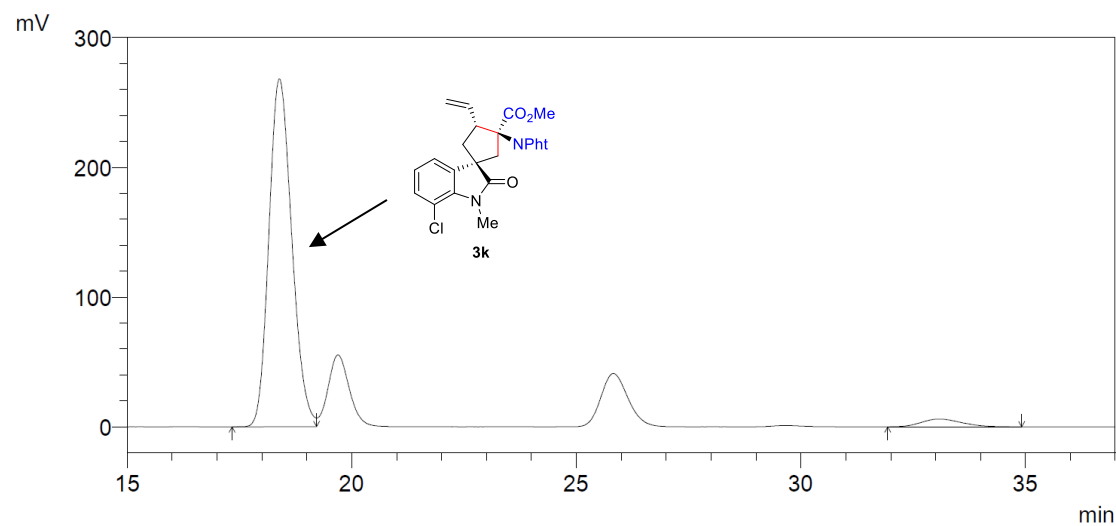

PDA 254nm

| ID# | Rt.Time | Area    | Height | Area%  |
|-----|---------|---------|--------|--------|
| 1   | 18.388  | 9504426 | 268405 | 96.188 |
| 2   | 33.080  | 376642  | 5993   | 3.812  |

**Chiral HPLC analysis:** Chiralcel AD-H, Hexane/*i*-PrOH = 90/10, flow rate 1.0 mL/min,  $\lambda = 254$  nm,  $t_{(1S,2R,4R)}$ -3k = 17.2 min (major),  $t_{(1R,2S,4S)}$ -3k = 31.5 min (minor).

### HPLC spectra of *rac*-3k'

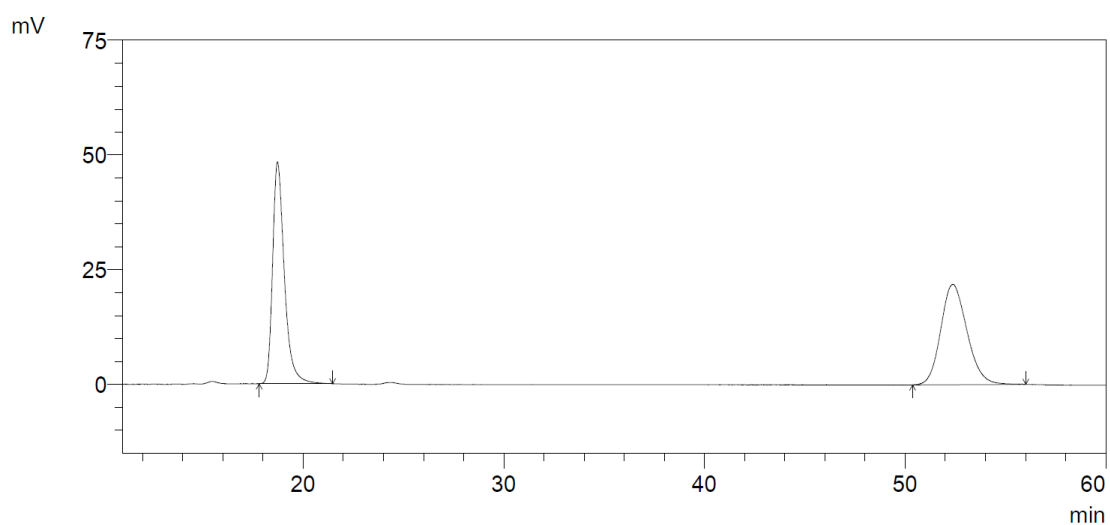

PDA 254nm

| ID# | Rt.Time | Area    | Height | Area%  |
|-----|---------|---------|--------|--------|
| 1   | 18.726  | 1971941 | 48376  | 49.765 |
| 2   | 52.387  | 1990525 | 21891  | 50.235 |

### HPLC spectra of chiral 3k'

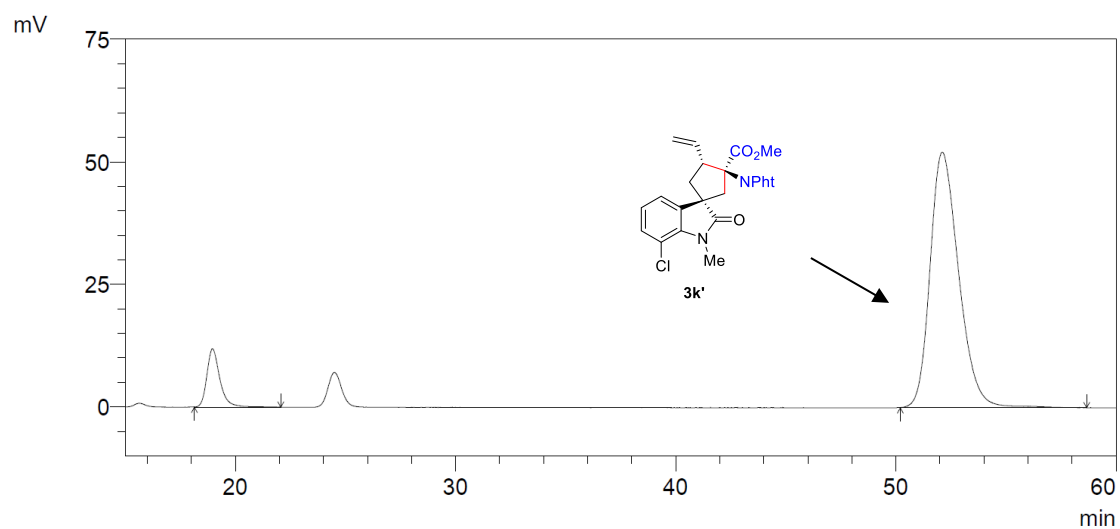

PDA 254nm

| ID# | Rt.Time | Area    | Height | Area%  |
|-----|---------|---------|--------|--------|
| 1   | 18.959  | 493384  | 11933  | 9.462  |
| 2   | 52.113  | 4720909 | 52166  | 90.538 |

**Chiral HPLC analysis:** Chiralcel IF, Hexane/*i*-PrOH = 85/15, flow rate 1.5 mL/min,  $\lambda = 254$  nm,  $t_{(1R,2R,4S)}$ -3k' = 18.7 min (minor),  $t_{(1S,2S,4R)}$ -3k' = 52.4 min (major).

### HPLC spectra of *rac*-3k''

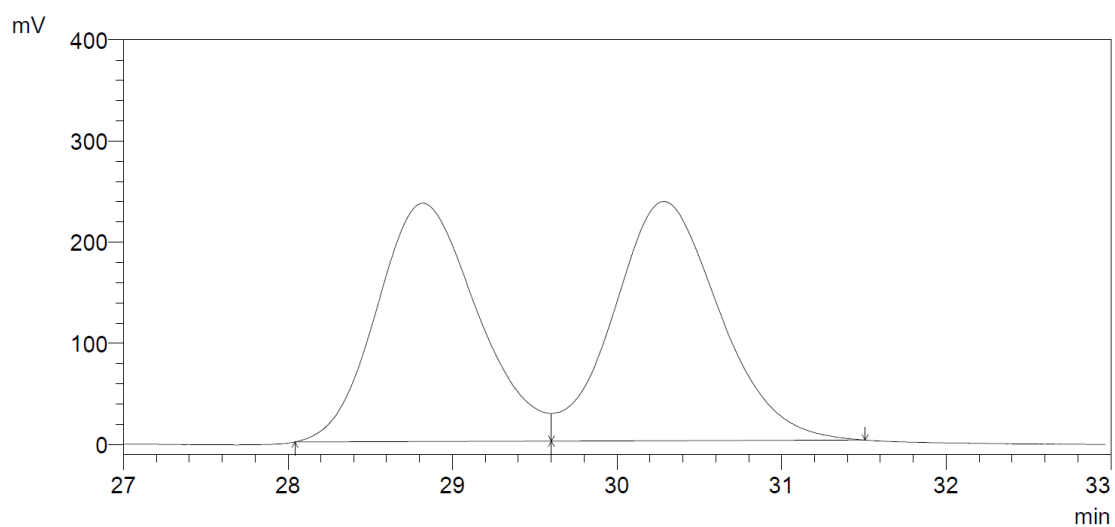

PDA 254nm

| ID# | Rt.Time | Area     | Height | Area%  |
|-----|---------|----------|--------|--------|
| 1   | 28.819  | 10039999 | 235764 | 48.704 |
| 2   | 30.284  | 10574419 | 236688 | 51.296 |

### HPLC spectra of chiral 3k''

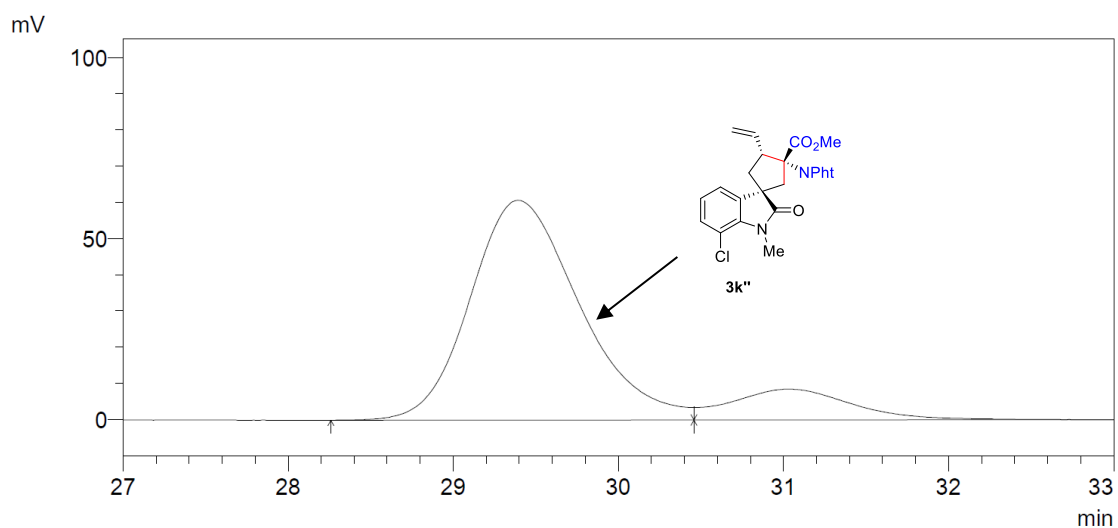

PDA 254nm

| ID# | Rt.Time | Area    | Height | Area%  |
|-----|---------|---------|--------|--------|
| 1   | 29.393  | 2797425 | 60683  | 86.599 |
| 2   | 31.028  | 432909  | 8499   | 13.401 |

**Chiral HPLC analysis:** Chiralcel IF, Hexane/*i*-PrOH = 90/10, flow rate 1.0 mL/min,  $\lambda = 254$  nm,  $t_{(1S,2R,4S)}$ -3k'' = 28.8 min (major),  $t_{(1R,2S,4R)}$ -3k'' = 30.3 min (minor).

### HPLC spectra of *rac*-31

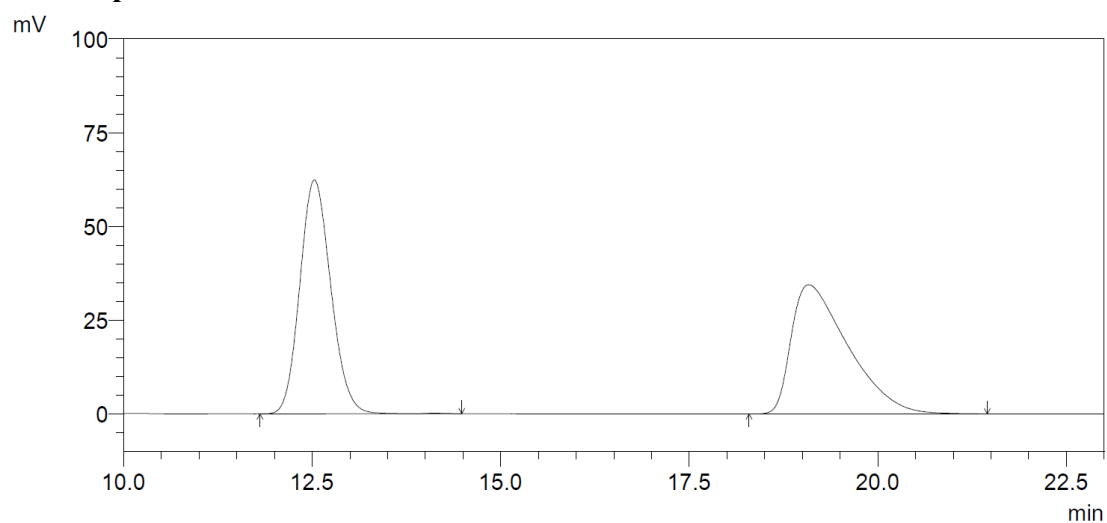

PDA 254nm

| ID# | Rt.Time | Area    | Height | Area%  |
|-----|---------|---------|--------|--------|
| 1   | 12.529  | 1786760 | 62390  | 49.762 |
| 2   | 19.083  | 1803861 | 34494  | 50.238 |

### HPLC spectra of chiral 31

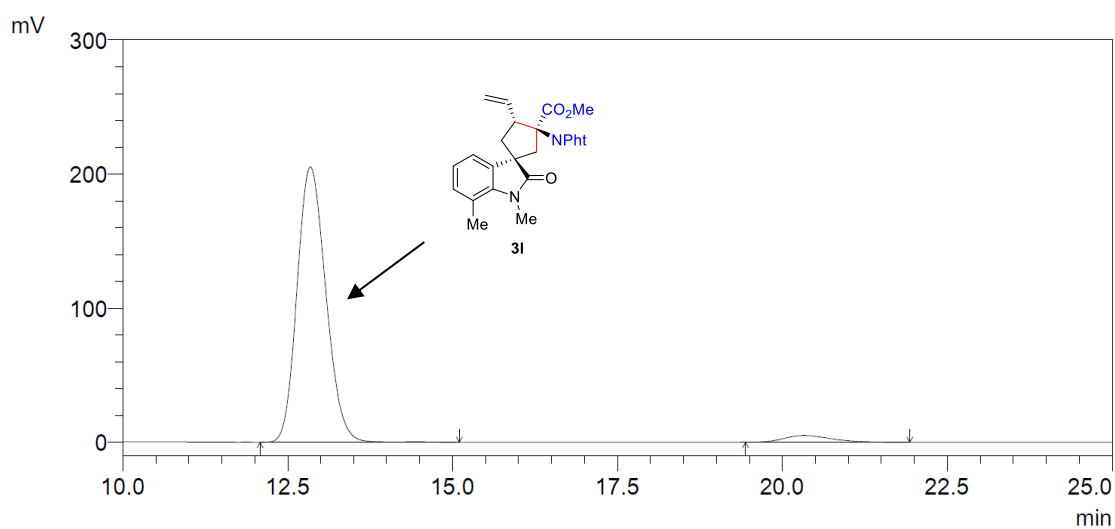

PDA 254nm

| ID# | Rt.Time | Area    | Height | Area%  |
|-----|---------|---------|--------|--------|
| 1   | 12.843  | 6225318 | 205436 | 95.994 |
| 2   | 20.330  | 259819  | 5098   | 4.006  |

**Chiral HPLC analysis:** Chiralcel AD-H, Hexane/*i*-PrOH = 85/15, flow rate 1.5 mL/min,  $\lambda = 254$  nm,  $t_{(1S,2R,4R)}\text{-31} = 12.5$  min (major),  $t_{(1R,2S,4S)}\text{-31} = 19.1$  min (minor).

### HPLC spectra of *rac*-3I'

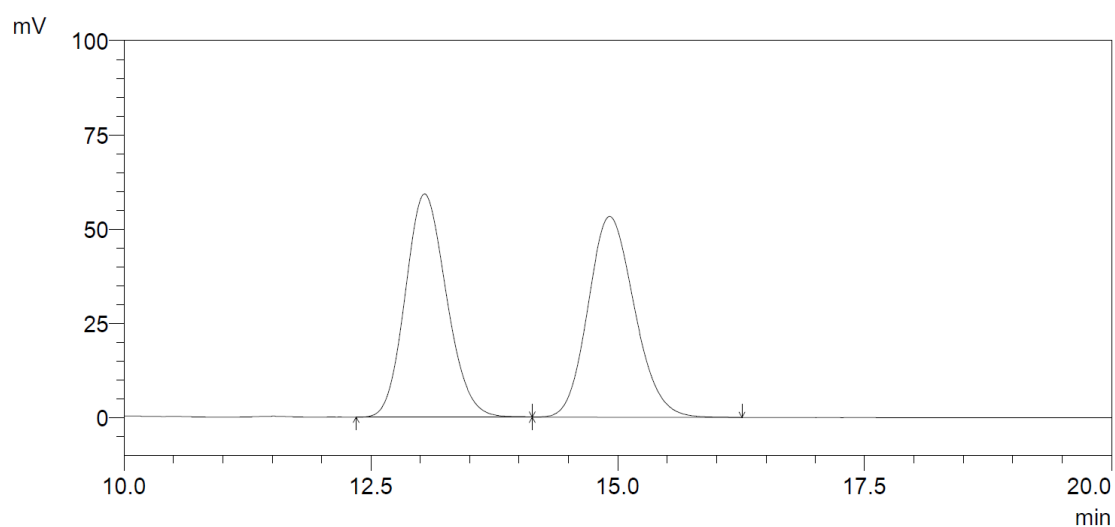

PDA 254nm

| ID# | Rt.Time | Area    | Height | Area%  |
|-----|---------|---------|--------|--------|
| 1   | 13.043  | 1722990 | 59265  | 49.671 |
| 2   | 14.918  | 1745782 | 53288  | 50.329 |

### HPLC spectra of chiral 3I'

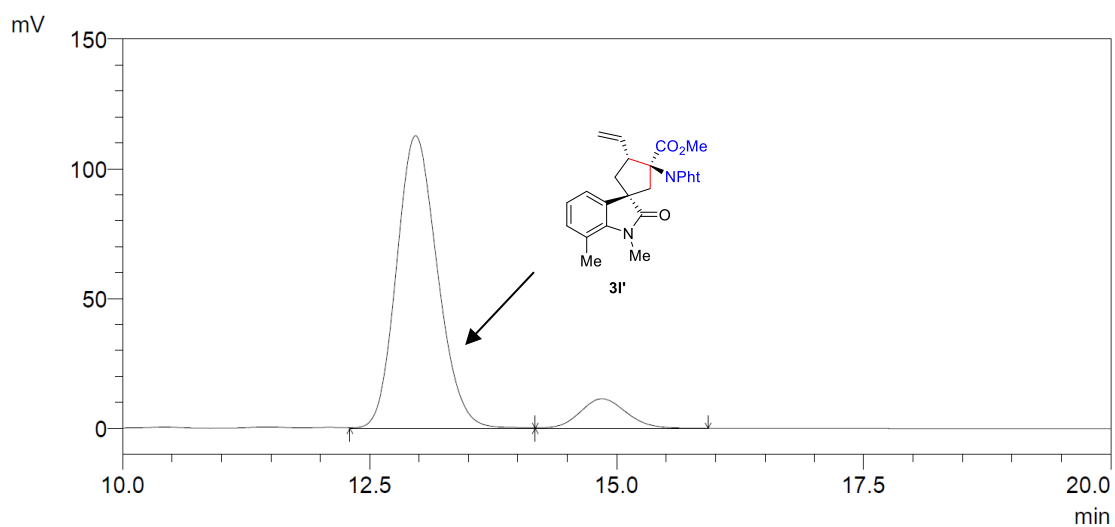

PDA 254nm

| ID# | Rt.Time | Area    | Height | Area%  |
|-----|---------|---------|--------|--------|
| 1   | 12.963  | 3252224 | 112803 | 89.801 |
| 2   | 14.851  | 369382  | 11387  | 10.199 |

**Chiral HPLC analysis:** Chiralcel AD-H, Hexane/*i*-PrOH = 85/15, flow rate 1.5 mL/min,  $\lambda = 254$  nm,  $t_{(1R,2R,4S)}$ -3I' = 13.0 min (major),  $t_{(1S,2S,4R)}$ -3I' = 14.9 min (minor).

### HPLC spectra of *rac*-3I''

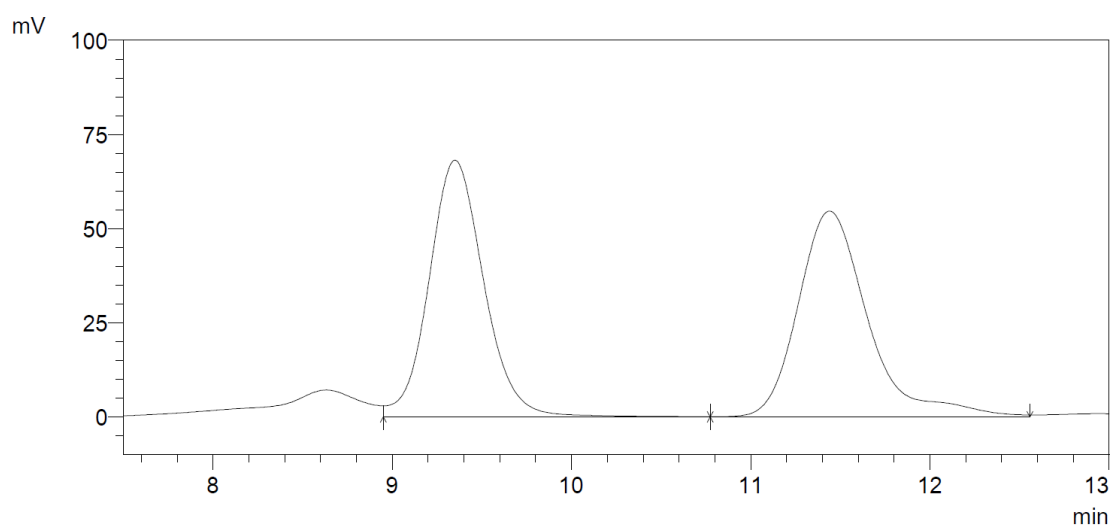

PDA 254nm

| ID# | Rt.Time | Area    | Height | Area%  |
|-----|---------|---------|--------|--------|
| 1   | 9.350   | 1447616 | 68200  | 49.492 |
| 2   | 11.440  | 1477361 | 54674  | 50.508 |

### HPLC spectra of chiral 3I''

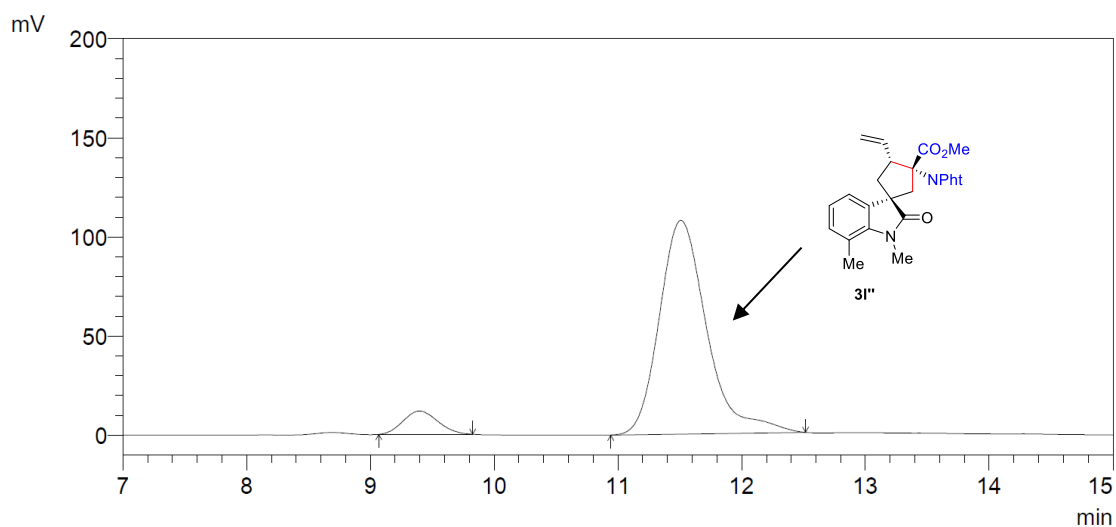

PDA 254nm

| ID# | Rt.Time | Area    | Height | Area%  |
|-----|---------|---------|--------|--------|
| 1   | 9.396   | 229904  | 11767  | 7.418  |
| 2   | 11.509  | 2869214 | 107904 | 92.582 |

**Chiral HPLC analysis:** Chiralcel AD-H, Hexane/*i*-PrOH = 85/15, flow rate 1.5 mL/min,  $\lambda = 254$  nm,  $t_{(1S,2R,4S)}$ -3I'' = 9.4 min (minor),  $t_{(1R,2S,4R)}$ -3I'' = 11.4 min (major).



### HPLC spectra of *rac*-3m' and 3m''

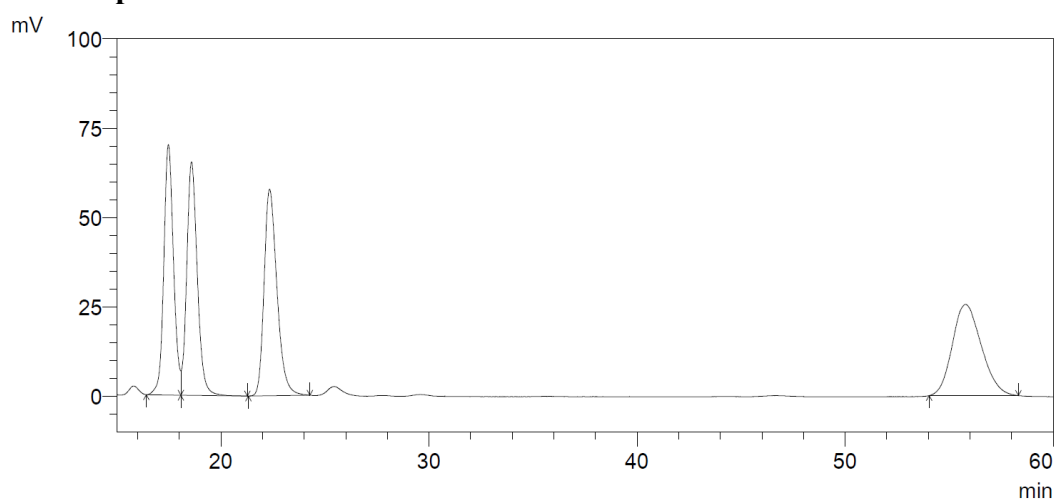

PDA 254nm

| ID# | Rt.Time | Area    | Height | Area%  |
|-----|---------|---------|--------|--------|
| 1   | 17.473  | 2272746 | 70109  | 23.814 |
| 2   | 18.587  | 2304458 | 65354  | 24.147 |
| 3   | 22.341  | 2490689 | 57805  | 26.098 |
| 4   | 55.794  | 2475699 | 25519  | 25.941 |

### HPLC spectra of chiral 3m' and 3m''

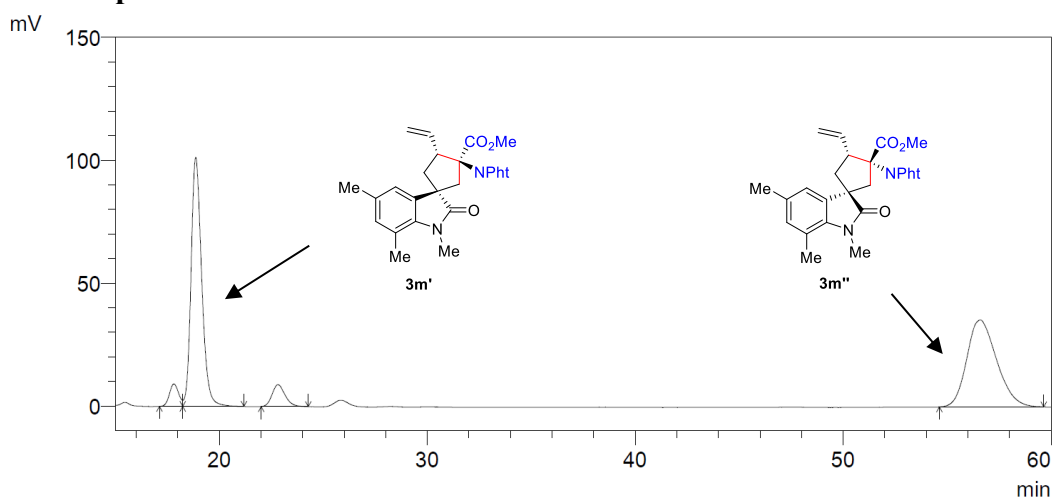

PDA 254nm

| ID# | Rt.Time | Area    | Height | Area%  |
|-----|---------|---------|--------|--------|
| 1   | 17.815  | 285911  | 9165   | 3.657  |
| 2   | 18.863  | 3604220 | 101426 | 46.103 |
| 3   | 22.820  | 391158  | 8962   | 5.003  |
| 4   | 56.596  | 3536512 | 35437  | 45.237 |

**Chiral HPLC analysis of 3m':** Chiralcel IF, Hexane/*i*-PrOH = 85/15, flow rate 1.5 mL/min,  $\lambda = 254$  nm,  $t_{(1R,2R,4S)-3m'}$  = 17.8 min (minor),  $t_{(1S,2S,4R)-3m'}$  = 18.9 min (major).

**Chiral HPLC analysis of 3m'':** Chiralcel IF, Hexane/*i*-PrOH = 85/15, flow rate 1.5 mL/min,  $\lambda = 254$  nm,  $t_{(1S,2R,4S)-3m''}$  = 22.8 min (minor),  $t_{(1R,2S,4R)-3m''}$  = 56.6 min (major).

### HPLC spectra of *rac*-3n

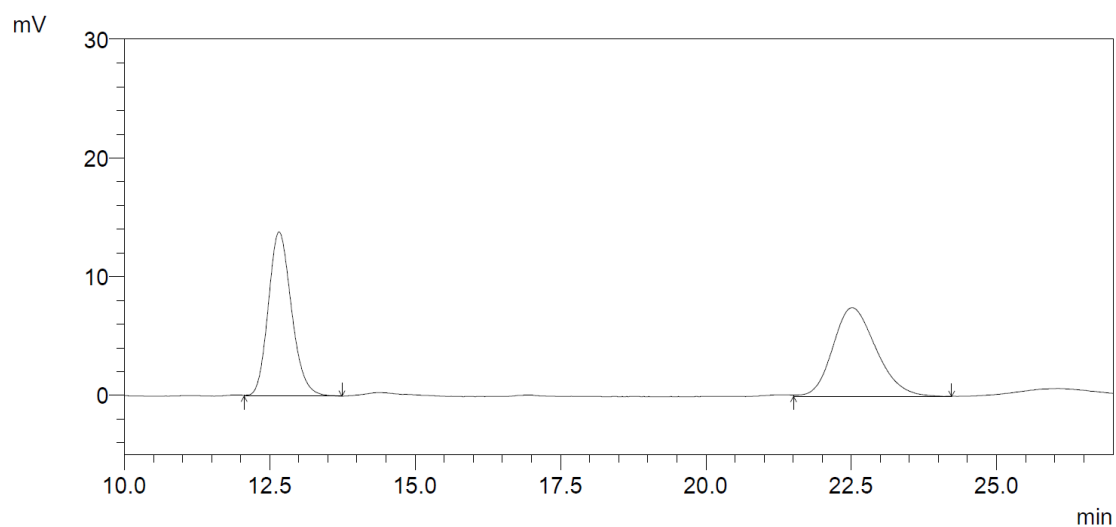

PDA 254nm

| ID# | Rt.Time | Area   | Height | Area%  |
|-----|---------|--------|--------|--------|
| 1   | 12.661  | 385206 | 13835  | 49.823 |
| 2   | 22.517  | 387948 | 7487   | 50.177 |

### HPLC spectra of chiral 3n

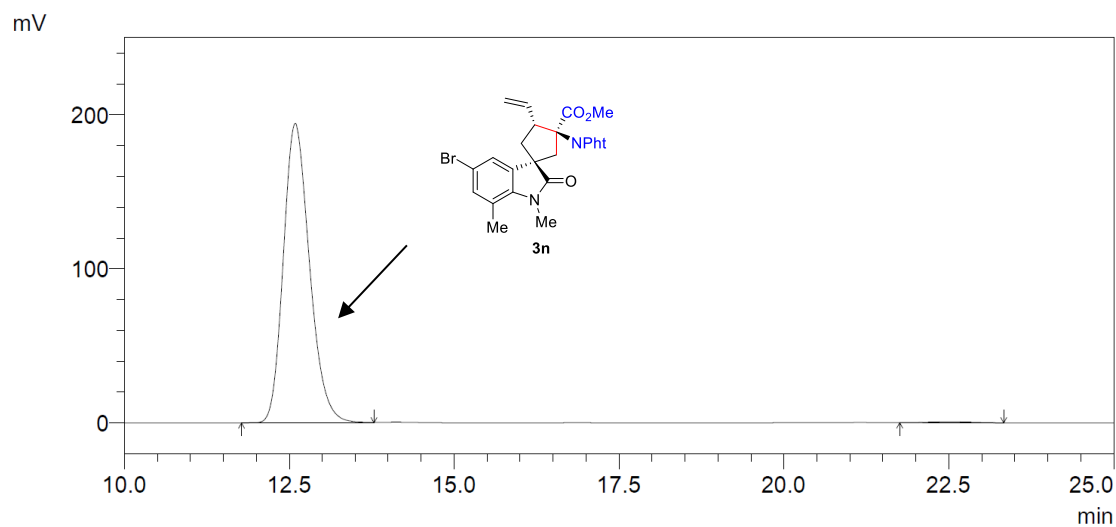

PDA 254nm

| ID# | Rt.Time | Area    | Height | Area%  |
|-----|---------|---------|--------|--------|
| 1   | 12.589  | 5384237 | 194303 | 99.450 |
| 2   | 22.522  | 29778   | 640    | 0.550  |

**Chiral HPLC analysis:** Chiralcel AD-H, Hexane/*i*-PrOH = 85/15, flow rate 1.5 mL/min,  $\lambda = 254$  nm,  $t_{(1S,2R,4R)\text{-}3n} = 12.7$  min (major),  $t_{(1R,2S,4S)\text{-}3n} = 22.5$  min (minor).

### HPLC spectra of *rac*-3n'

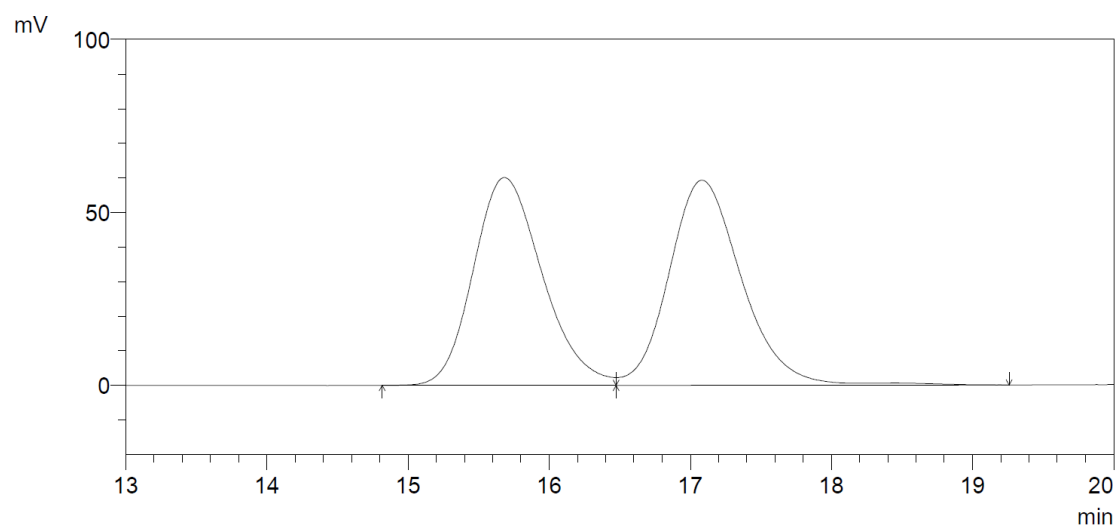

PDA 254nm

| ID# | Rt.Time | Area    | Height | Area%  |
|-----|---------|---------|--------|--------|
| 1   | 15.683  | 2043002 | 60088  | 49.057 |
| 2   | 17.083  | 2121507 | 59286  | 50.943 |

### HPLC spectra of chiral 3n'

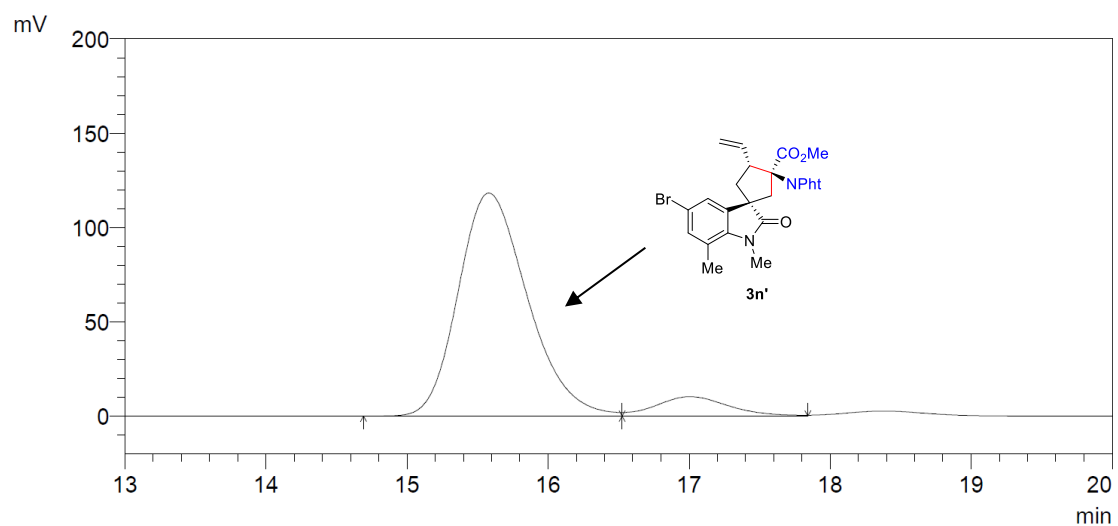

PDA 254nm

| ID# | Rt.Time | Area    | Height | Area%  |
|-----|---------|---------|--------|--------|
| 1   | 15.580  | 4047517 | 118348 | 91.615 |
| 2   | 17.005  | 370433  | 10302  | 8.385  |

**Chiral HPLC analysis:** Chiralcel AD-H, Hexane/*i*-PrOH = 85/15, flow rate 1.5 mL/min,  $\lambda = 254$  nm,  $t_{(1R,2R,4S)}\text{-3n}' = 15.7$  min (major),  $t_{(1S,2S,4R)}\text{-3n}' = 17.1$  min (minor).

### HPLC spectra of *rac*-3n''

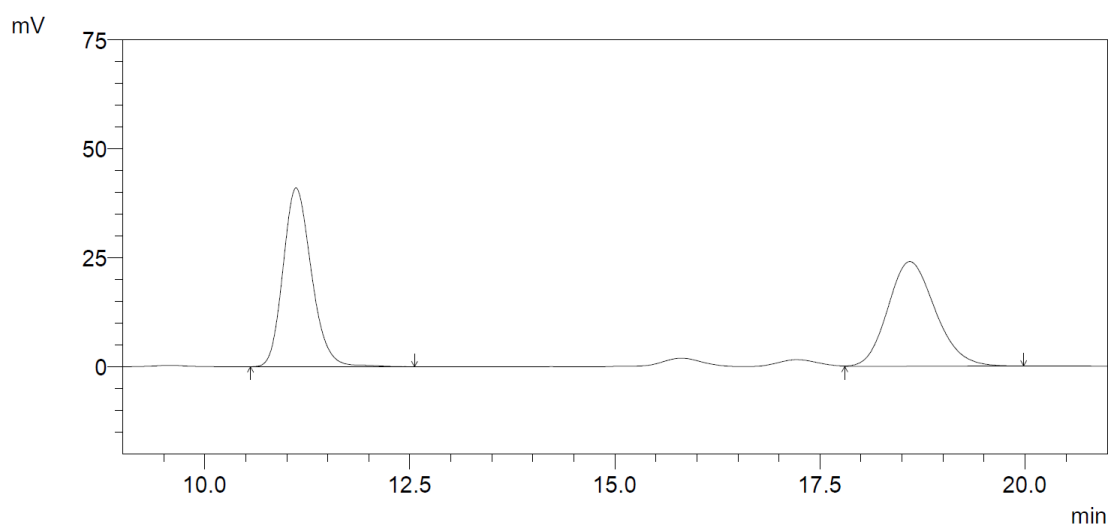

PDA 254nm

| ID# | Rt.Time | Area   | Height | Area%  |
|-----|---------|--------|--------|--------|
| 1   | 11.113  | 990465 | 41045  | 50.674 |
| 2   | 18.595  | 964133 | 24039  | 49.326 |

### HPLC spectra of chiral 3n''

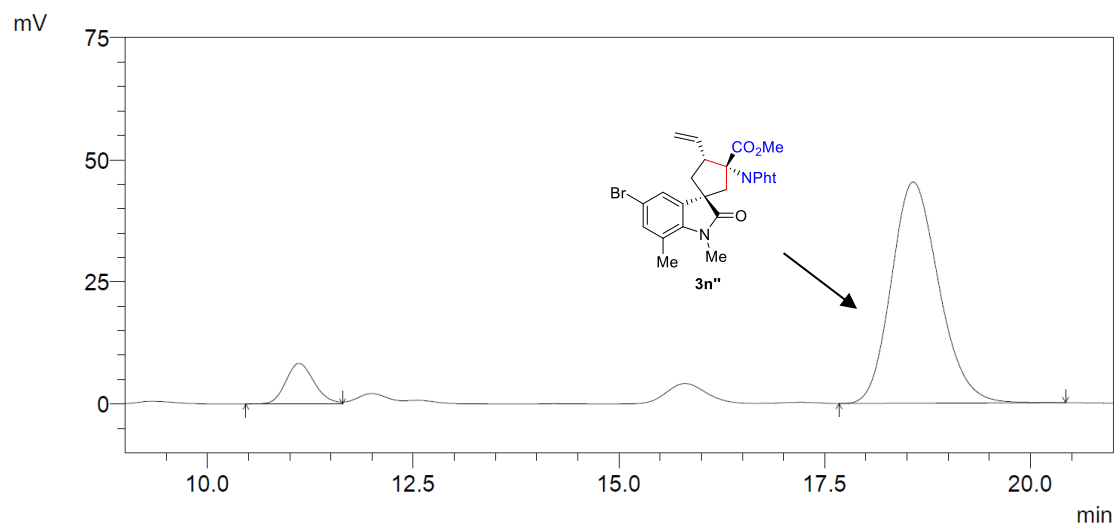

PDA 254nm

| ID# | Rt.Time | Area    | Height | Area%  |
|-----|---------|---------|--------|--------|
| 1   | 11.114  | 200248  | 8328   | 9.914  |
| 2   | 18.574  | 1819699 | 45319  | 90.086 |

**Chiral HPLC analysis:** Chiralcel AD-H, Hexane/*i*-PrOH = 85/15, flow rate 1.5 mL/min,  $\lambda = 254$  nm,  $t_{(1S,2R,4S)}\text{-3n''} = 11.1$  min (minor),  $t_{(1R,2S,4R)}\text{-3n''} = 18.6$  min (major).

### HPLC spectra of *rac*-3o

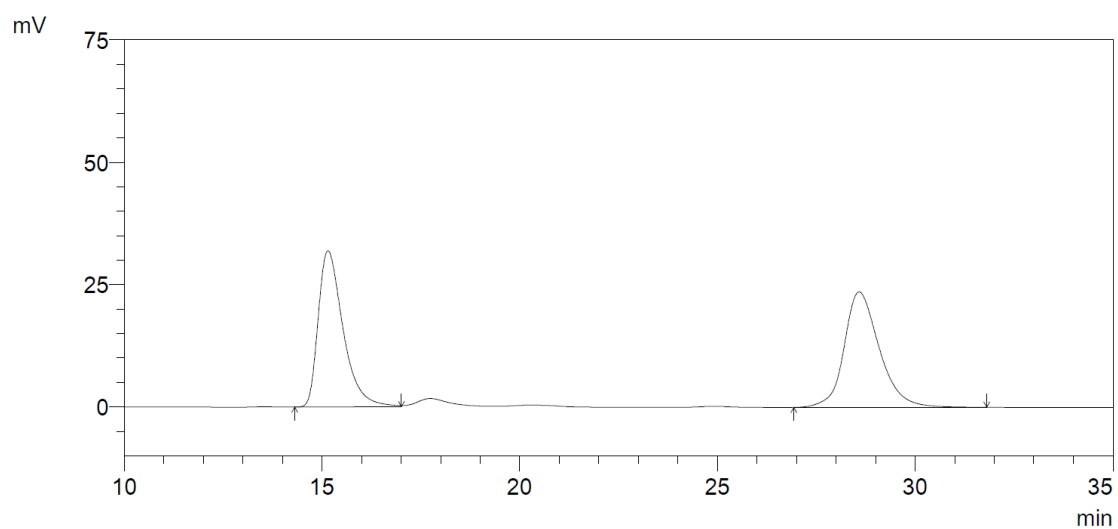

PDA 254nm

| ID# | Rt.Time | Area    | Height | Area%  |
|-----|---------|---------|--------|--------|
| 1   | 15.151  | 1397007 | 31940  | 48.878 |
| 2   | 28.582  | 1461160 | 23613  | 51.122 |

### HPLC spectra of chiral 3o

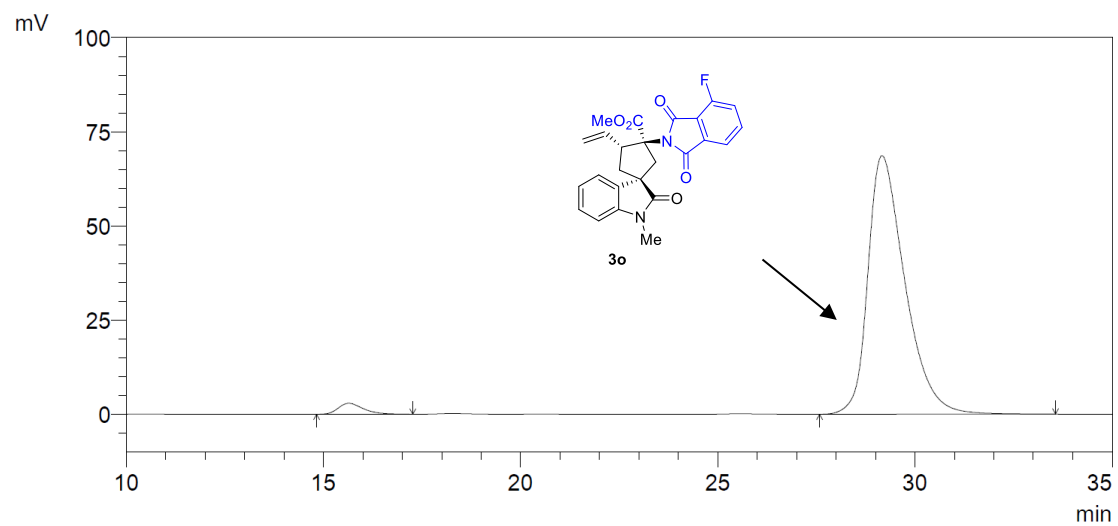

PDA 254nm

| ID# | Rt.Time | Area    | Height | Area%  |
|-----|---------|---------|--------|--------|
| 1   | 15.643  | 127881  | 2897   | 2.774  |
| 2   | 29.165  | 4482498 | 68682  | 97.226 |

**Chiral HPLC analysis:** Chiralcel IF, Hexane/*i*-PrOH = 85/15, flow rate 1.5 mL/min,  $\lambda = 254$  nm,  $t_{(1S,2R,4R)\text{-}3o} = 15.2$  min (minor),  $t_{(1R,2S,4S)\text{-}3o} = 28.6$  min (major).

### HPLC spectra of *rac*-3o' and 3o''

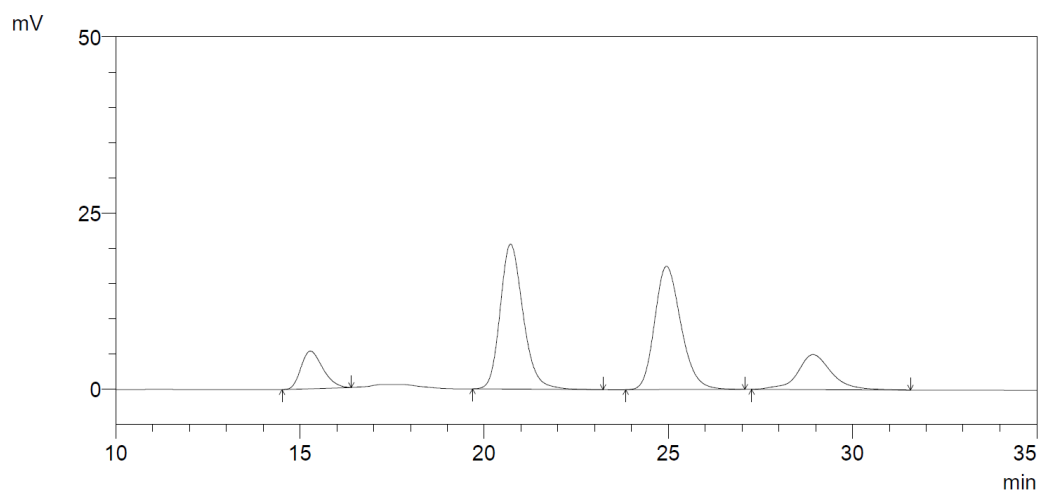

PDA 254nm

| ID# | Rt.Time | Area   | Height | Area%  |
|-----|---------|--------|--------|--------|
| 1   | 15.281  | 219739 | 5340   | 9.545  |
| 2   | 20.715  | 892048 | 20587  | 38.747 |
| 3   | 24.949  | 871293 | 17526  | 37.846 |
| 4   | 28.928  | 319150 | 4983   | 13.863 |

### HPLC spectra of chiral 3o' and 3o''

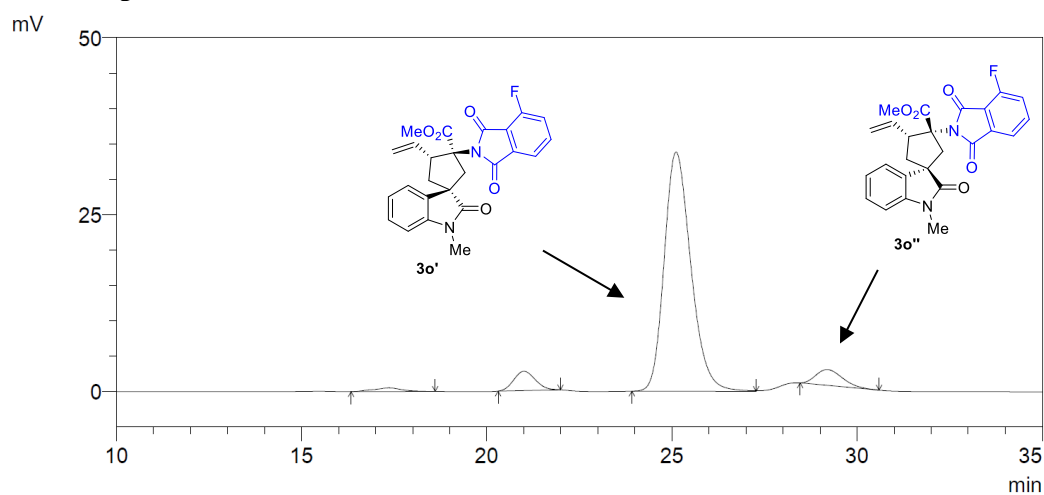

PDA 254nm

| ID# | Rt.Time | Area    | Height | Area%  |
|-----|---------|---------|--------|--------|
| 1   | 17.356  | 27586   | 515    | 1.420  |
| 2   | 21.004  | 110123  | 2730   | 5.670  |
| 3   | 25.111  | 1692655 | 33823  | 87.151 |
| 4   | 29.187  | 111854  | 2242   | 5.759  |

**Chiral HPLC analysis of 3o':** Chiralcel AD-H, Hexane/*i*-PrOH = 85/15, flow rate 1.5 mL/min,  $\lambda = 254$  nm,  $t_{(1R,2R,4S)-3o'}$  = 20.7 min (minor),  $t_{(1S,2S,4R)-3o'}$  = 24.9 min (major).

**Chiral HPLC analysis of 3o'':** Chiralcel AD-H, Hexane/*i*-PrOH = 85/15, flow rate 1.5 mL/min,  $\lambda = 254$  nm,  $t_{(1S,2R,4S)-3o''}$  = 15.3 min (minor),  $t_{(1R,2S,4R)-3o''}$  = 28.9 min (major).

### HPLC spectra of *rac*-3p

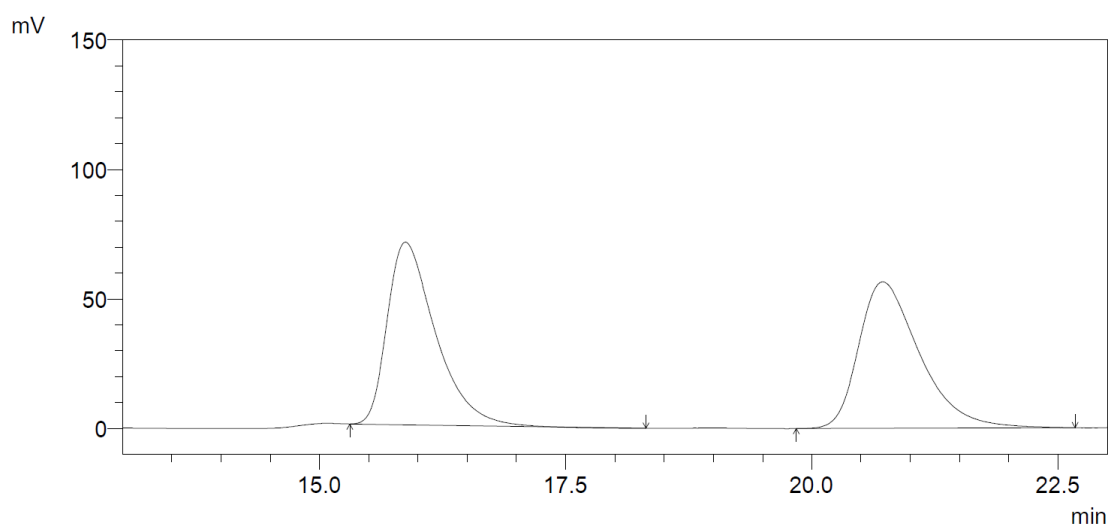

PDA 254nm

| ID# | Rt.Time | Area    | Height | Area%  |
|-----|---------|---------|--------|--------|
| 1   | 15.872  | 2409370 | 70574  | 49.682 |
| 2   | 20.721  | 2440216 | 56608  | 50.318 |

### HPLC spectra of chiral 3p

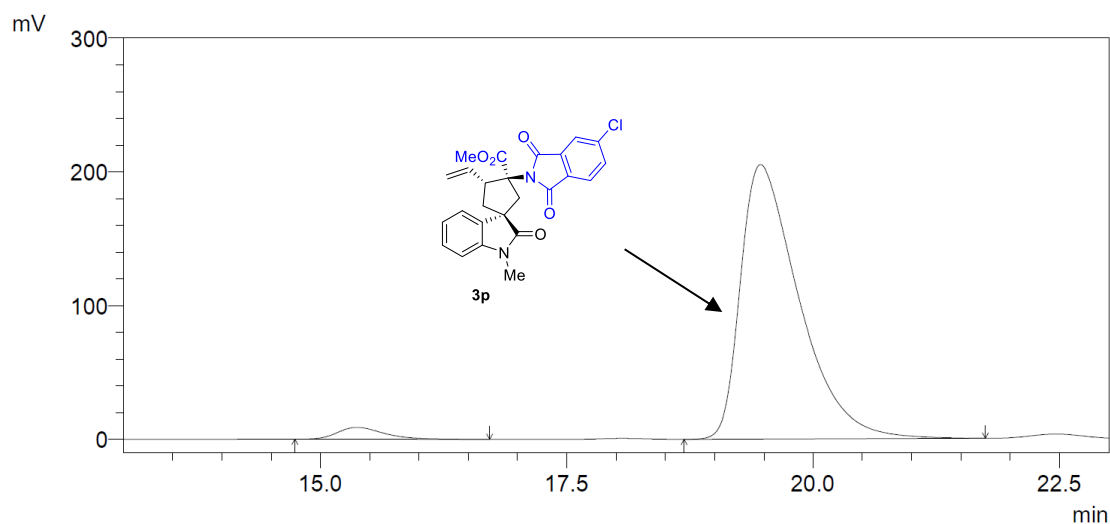

PDA 254nm

| ID# | Rt.Time | Area    | Height | Area%  |
|-----|---------|---------|--------|--------|
| 1   | 15.371  | 292014  | 8863   | 3.322  |
| 2   | 19.466  | 8498900 | 205328 | 96.678 |

**Chiral HPLC analysis:** Chiralcel IF, Hexane/*i*-PrOH = 85/15, flow rate 1.5 mL/min,  $\lambda = 254$  nm,  $t_{(1S,2R,4R)\text{-}3p} = 15.9$  min (minor),  $t_{(1R,2S,4S)\text{-}3p} = 20.7$  min (major).

### HPLC spectra of *rac*-3p'

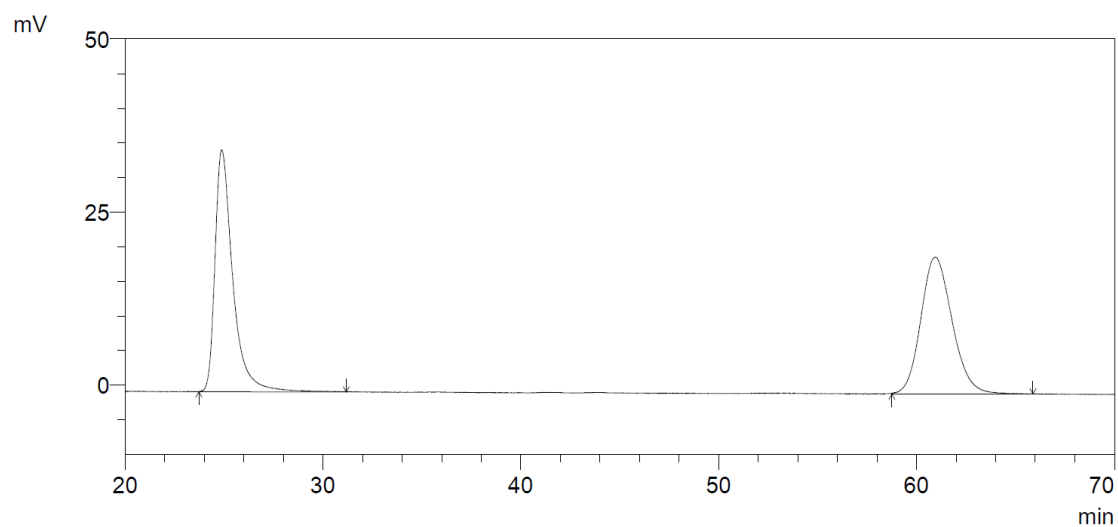

PDA 254nm

| ID# | Rt.Time | Area    | Height | Area%  |
|-----|---------|---------|--------|--------|
| 1   | 24.875  | 2184224 | 34990  | 50.103 |
| 2   | 60.956  | 2175240 | 19780  | 49.897 |

### HPLC spectra of chiral 3p'

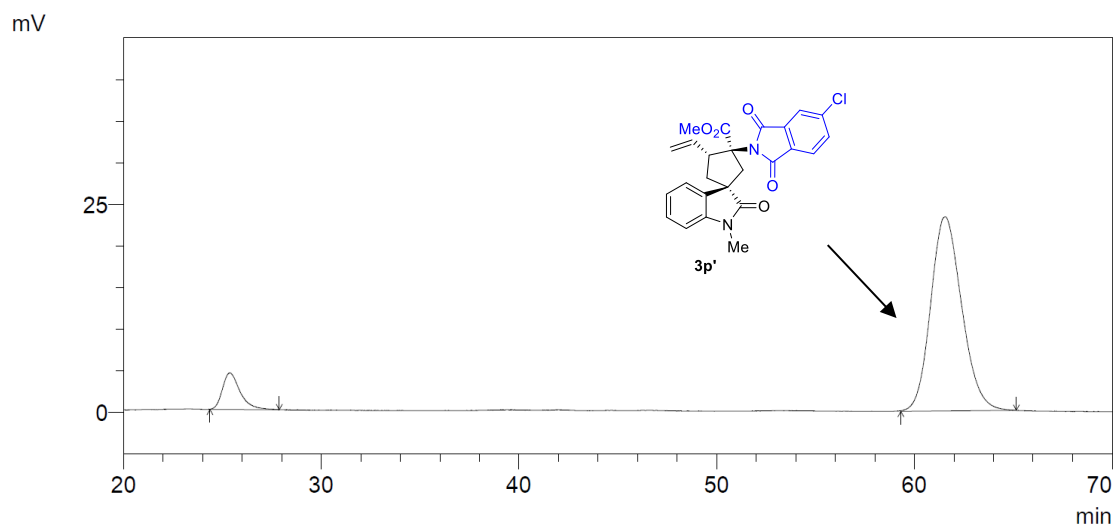

PDA 254nm

| ID# | Rt.Time | Area    | Height | Area%  |
|-----|---------|---------|--------|--------|
| 1   | 25.395  | 274060  | 4407   | 9.686  |
| 2   | 61.555  | 2555489 | 23351  | 90.314 |

**Chiral HPLC analysis:** Chiralcel IF, Hexane/*i*-PrOH = 85/15, flow rate 1.5 mL/min,  $\lambda = 254$  nm,  $t_{(1R,2R,4S)\text{-}3p'}$  = 24.9 min (minor),  $t_{(1S,2S,4R)\text{-}3p'}$  = 61.0 min (major).

### HPLC spectra of *rac*-3p''

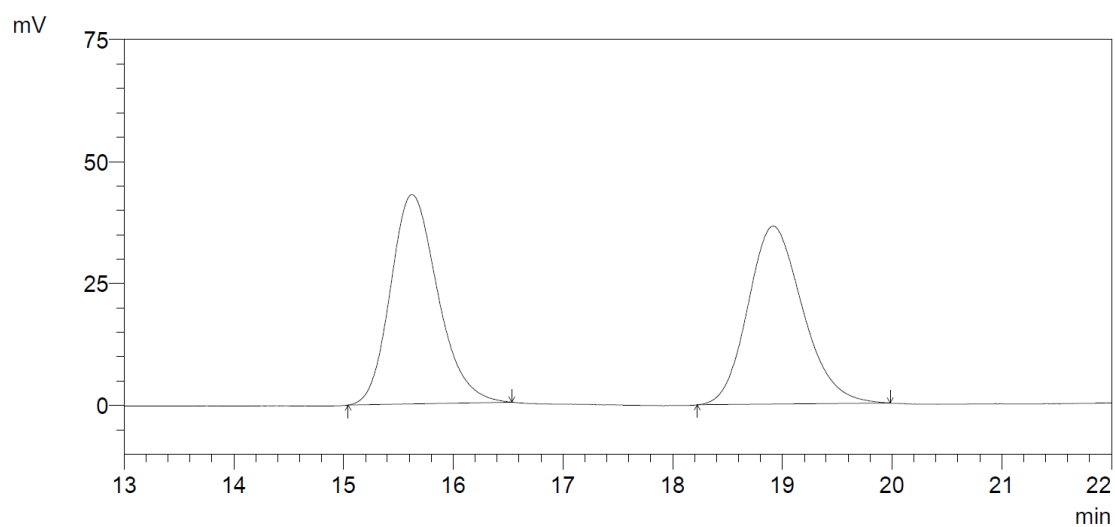

PDA 254nm

| ID# | Rt.Time | Area    | Height | Area%  |
|-----|---------|---------|--------|--------|
| 1   | 15.624  | 1285910 | 42957  | 50.345 |
| 2   | 18.915  | 1268284 | 36499  | 49.655 |

### HPLC spectra of chiral 3p''

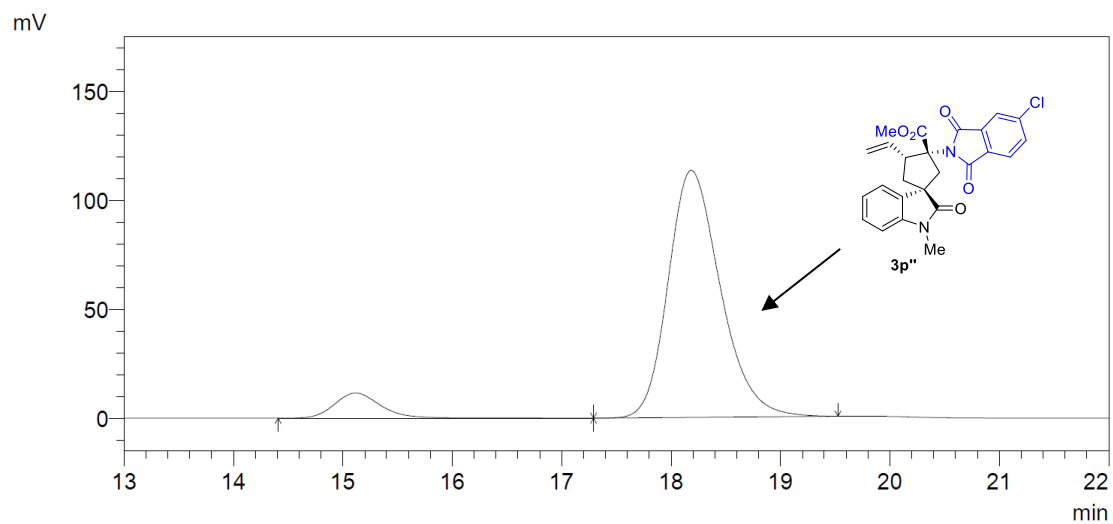

PDA 254nm

| ID# | Rt.Time | Area    | Height | Area%  |
|-----|---------|---------|--------|--------|
| 1   | 15.115  | 345558  | 11557  | 8.397  |
| 2   | 18.184  | 3769602 | 113539 | 91.603 |

**Chiral HPLC analysis:** Chiralcel IF, Hexane/*i*-PrOH = 85/15, flow rate 1.5 mL/min,  $\lambda = 254$  nm,  $t_{(1S,2R,4S)}\text{-3p''} = 15.6$  min (minor),  $t_{(1R,2S,4R)}\text{-3p''} = 18.9$  min (major).

### HPLC spectra of *rac*-3q

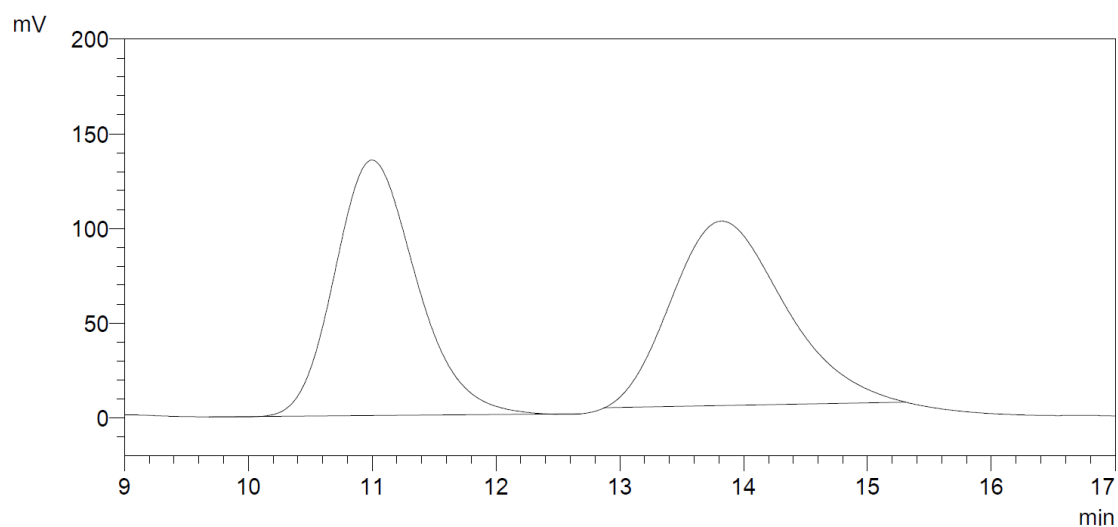

PDA 254nm

| ID# | Rt.Time | Area    | Height | Area%  |
|-----|---------|---------|--------|--------|
| 1   | 10.998  | 6192479 | 134979 | 49.886 |
| 2   | 13.824  | 6220801 | 97511  | 50.114 |

### HPLC spectra of chiral 3q

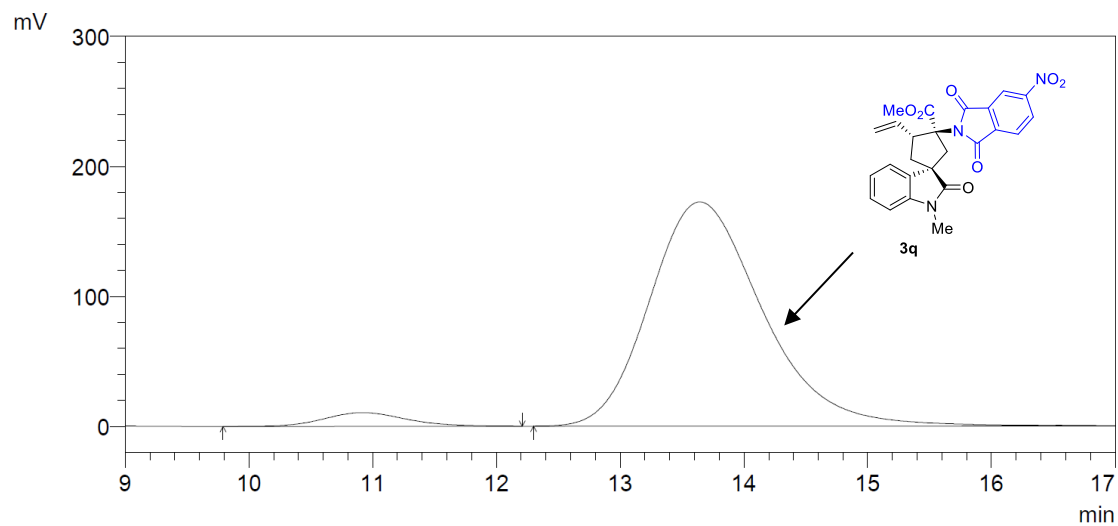

PDA 254nm

| ID# | Rt.Time | Area     | Height | Area%  |
|-----|---------|----------|--------|--------|
| 1   | 10.915  | 496112   | 10621  | 4.316  |
| 2   | 13.643  | 10999232 | 172587 | 95.684 |

**Chiral HPLC analysis:** Chiralcel IH, Hexane/*i*-PrOH = 85/15, flow rate 1.5 mL/min,  $\lambda = 254$  nm,  $t_{(1S,2R,4R)}$ -3q = 11.0 min (minor),  $t_{(1R,2S,4S)}$ -3q = 13.8 min (major).

### HPLC spectra of *rac*-3q'

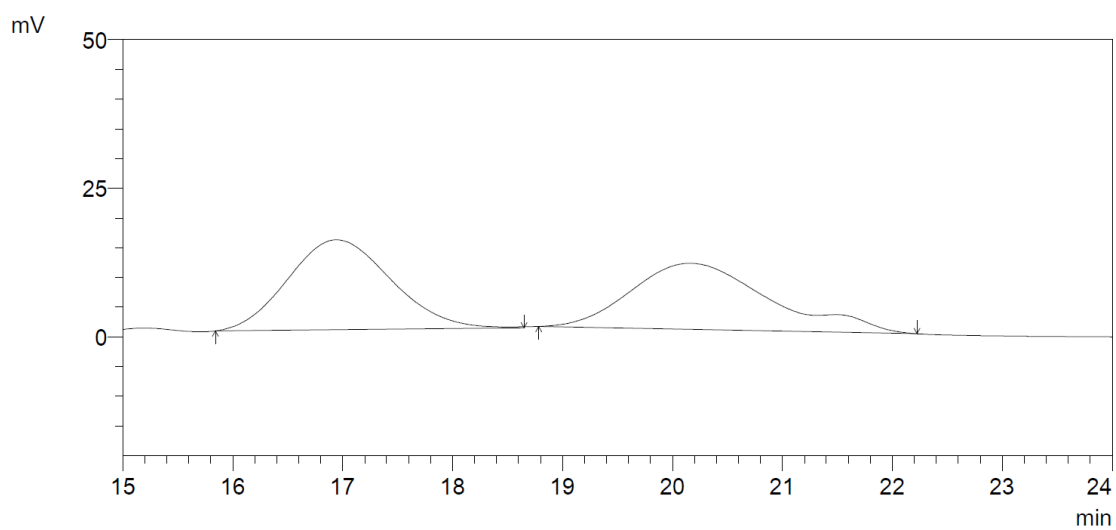

PDA 254nm

| ID# | Rt.Time | Area   | Height | Area%  |
|-----|---------|--------|--------|--------|
| 1   | 16.941  | 990522 | 15159  | 50.420 |
| 2   | 20.157  | 974020 | 11119  | 49.580 |

### HPLC spectra of chiral 3q'

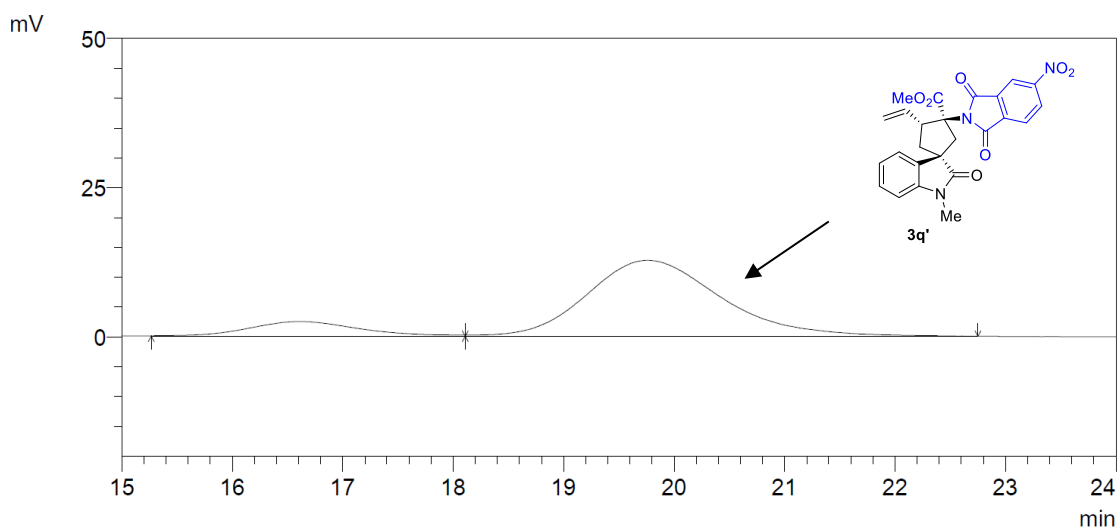

PDA 254nm

| ID# | Rt.Time | Area    | Height | Area%  |
|-----|---------|---------|--------|--------|
| 1   | 16.593  | 174091  | 2479   | 13.996 |
| 2   | 19.761  | 1069738 | 12729  | 86.004 |

**Chiral HPLC analysis:** Chiralcel IH, Hexane/*i*-PrOH = 85/15, flow rate 1.5 mL/min,  $\lambda = 254$  nm,  $t_{(1R,2R,4S)}$ -3q' = 16.9 min (minor),  $t_{(1S,2S,4R)}$ -3q' = 20.2 min (major).

### HPLC spectra of *rac*-3q''

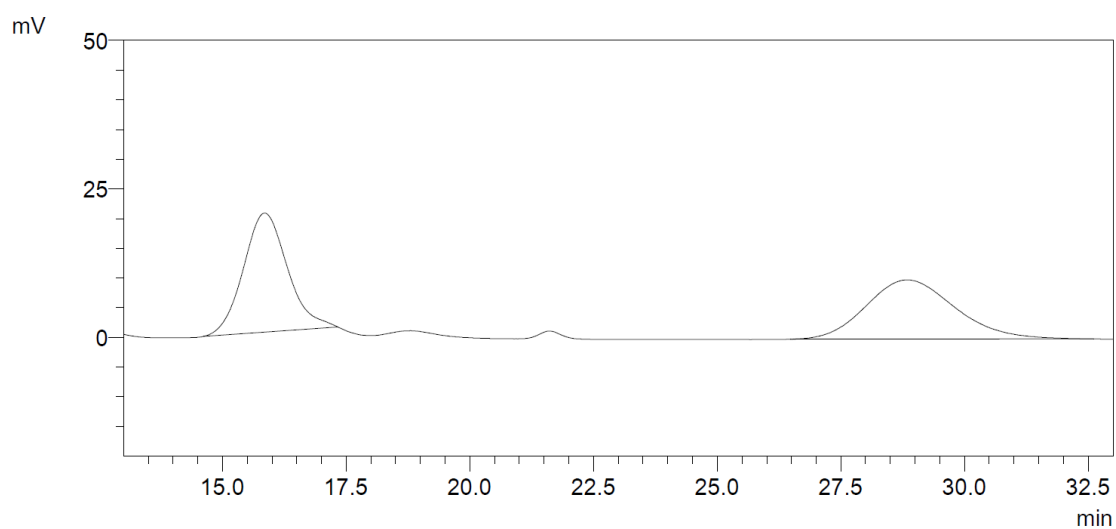

PDA 254nm

| ID# | Rt.Time | Area    | Height | Area%  |
|-----|---------|---------|--------|--------|
| 1   | 15.850  | 1242925 | 20053  | 49.983 |
| 2   | 28.837  | 1243793 | 9968   | 50.017 |

### HPLC spectra of chiral 3q''

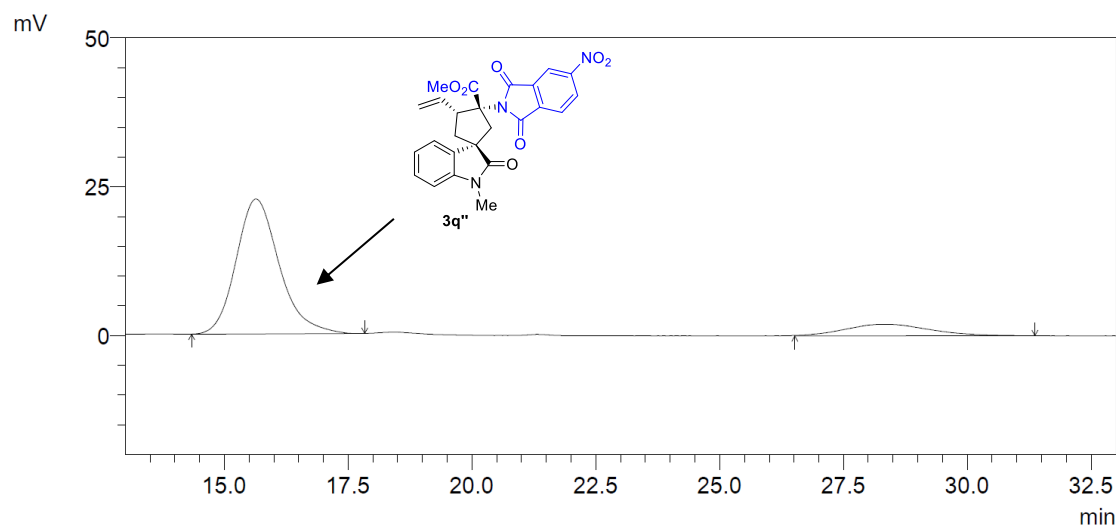

PDA 254nm

| ID# | Rt.Time | Area    | Height | Area%  |
|-----|---------|---------|--------|--------|
| 1   | 15.637  | 1374385 | 22693  | 85.591 |
| 2   | 28.320  | 231366  | 1961   | 14.409 |

**Chiral HPLC analysis:** Chiralcel IH, Hexane/*i*-PrOH = 85/15, flow rate 1.5 mL/min,  $\lambda = 254$  nm,  $t_{(1S,2R,4S)}\text{-3q''} = 15.8$  min (major),  $t_{(1R,2S,4R)}\text{-3q''} = 28.8$  min (minor).

### HPLC spectra of *rac*-3r

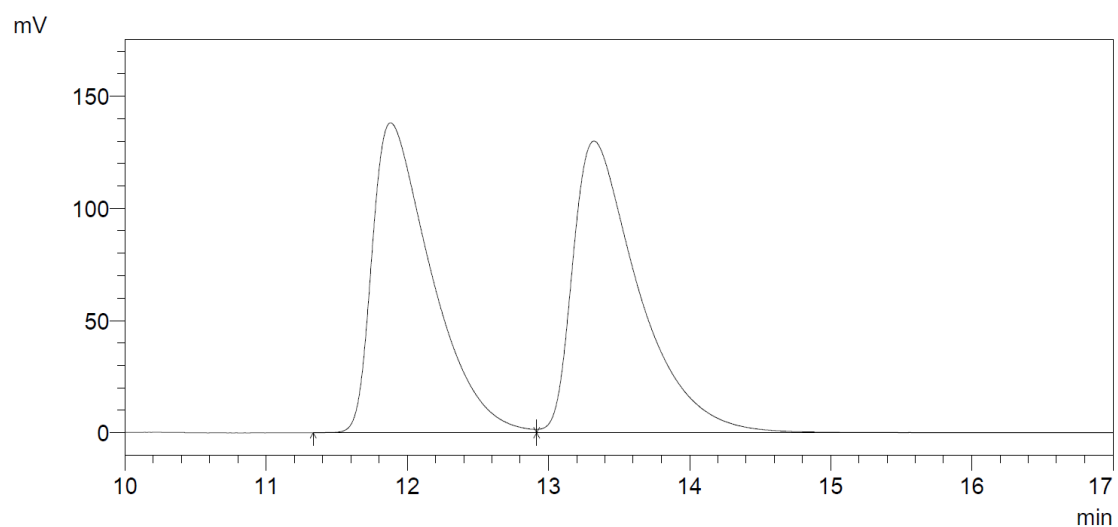

PDA 254nm

| ID# | Rt.Time | Area    | Height | Area%  |
|-----|---------|---------|--------|--------|
| 1   | 11.882  | 4030183 | 138101 | 48.835 |
| 2   | 13.323  | 4222403 | 129988 | 51.165 |

### HPLC spectra of chiral 3r

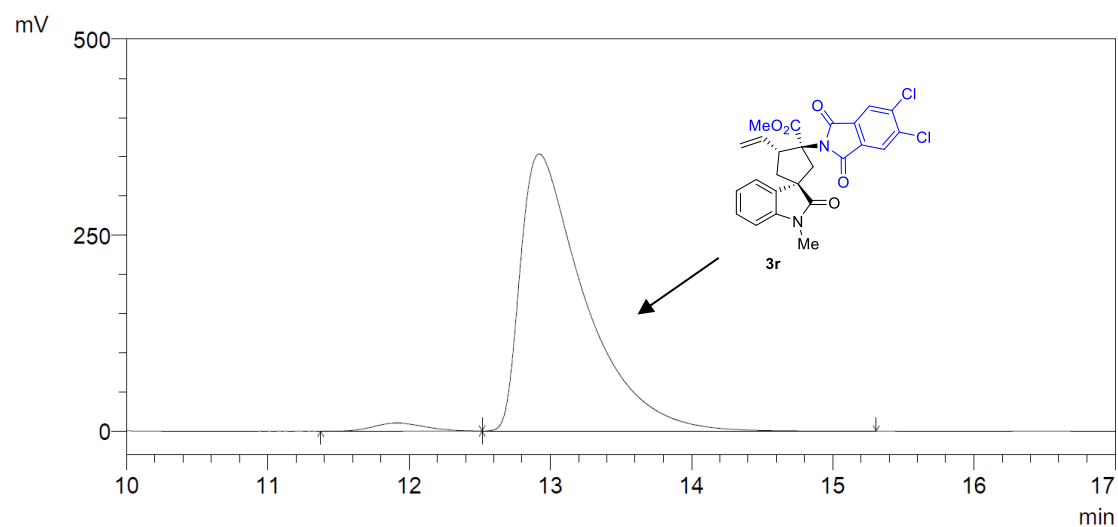

PDA 254nm

| ID# | Rt.Time | Area     | Height | Area%  |
|-----|---------|----------|--------|--------|
| 1   | 11.915  | 265193   | 10423  | 2.309  |
| 2   | 12.922  | 11220620 | 353810 | 97.691 |

**Chiral HPLC analysis:** Chiralcel AD-H, Hexane/*i*-PrOH = 85/15, flow rate 1.5 mL/min,  $\lambda = 254$  nm,  $t_{(1S,2R,4R)\text{-}3r} = 11.9$  min (minor),  $t_{(1R,2S,4S)\text{-}3r} = 13.3$  min (major).

### HPLC spectra of *rac*-3r'

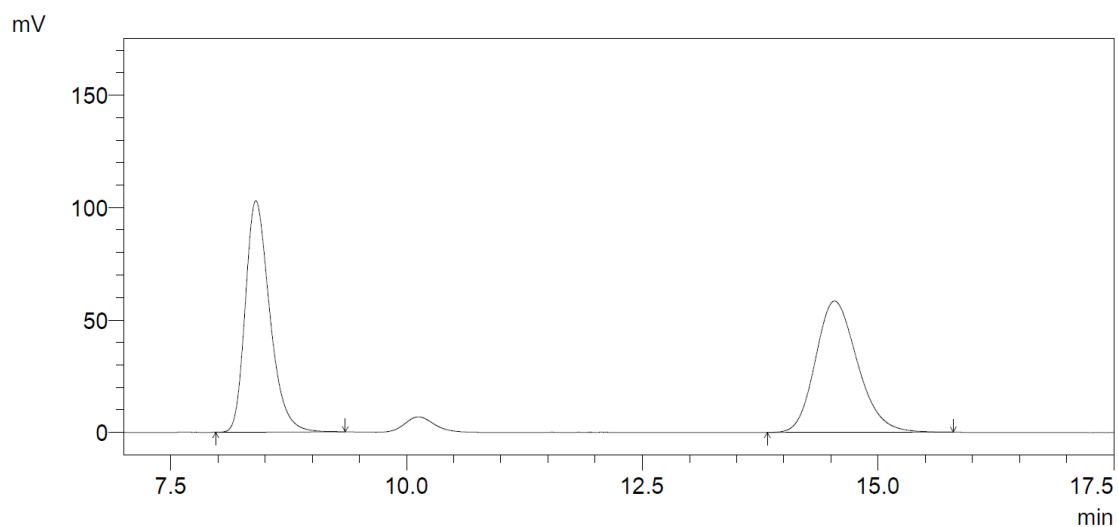

PDA 254nm

| ID# | Rt.Time | Area    | Height | Area%  |
|-----|---------|---------|--------|--------|
| 1   | 8.401   | 1856379 | 102857 | 50.665 |
| 2   | 14.540  | 1807613 | 58365  | 49.335 |

### HPLC spectra of chiral 3r'

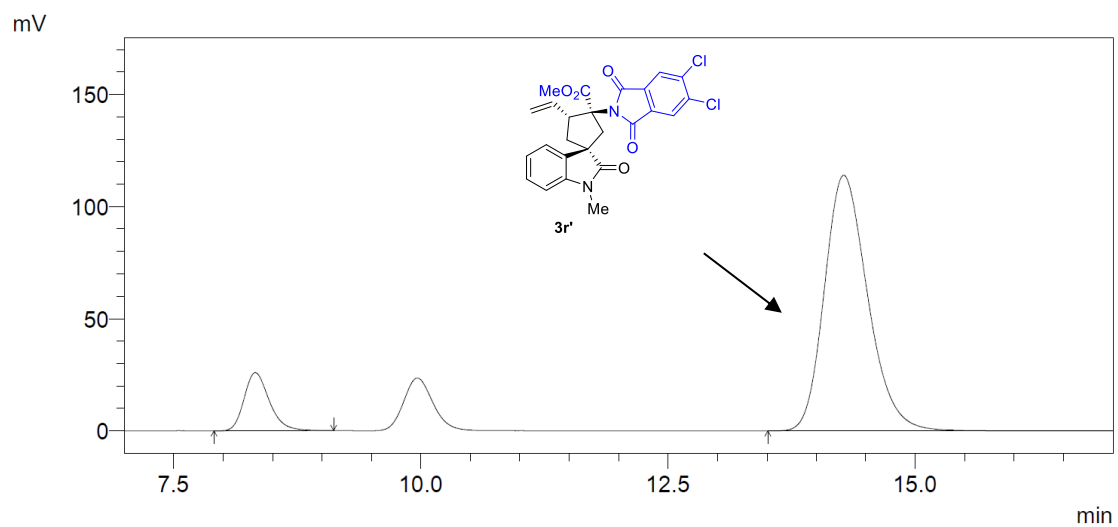

PDA 254nm

| ID# | Rt.Time | Area    | Height | Area%  |
|-----|---------|---------|--------|--------|
| 1   | 8.325   | 458060  | 25906  | 11.647 |
| 2   | 14.277  | 3474750 | 113931 | 88.353 |

**Chiral HPLC analysis:** Chiralcel AD-H, Hexane/*i*-PrOH = 85/15, flow rate 1.5 mL/min,  $\lambda = 254$  nm,  $t_{(1R,2R,4S)}$ -3r' = 8.4 min (minor),  $t_{(1S,2S,4R)}$ -3r' = 14.5 min (major).

### HPLC spectra of *rac*-3r''

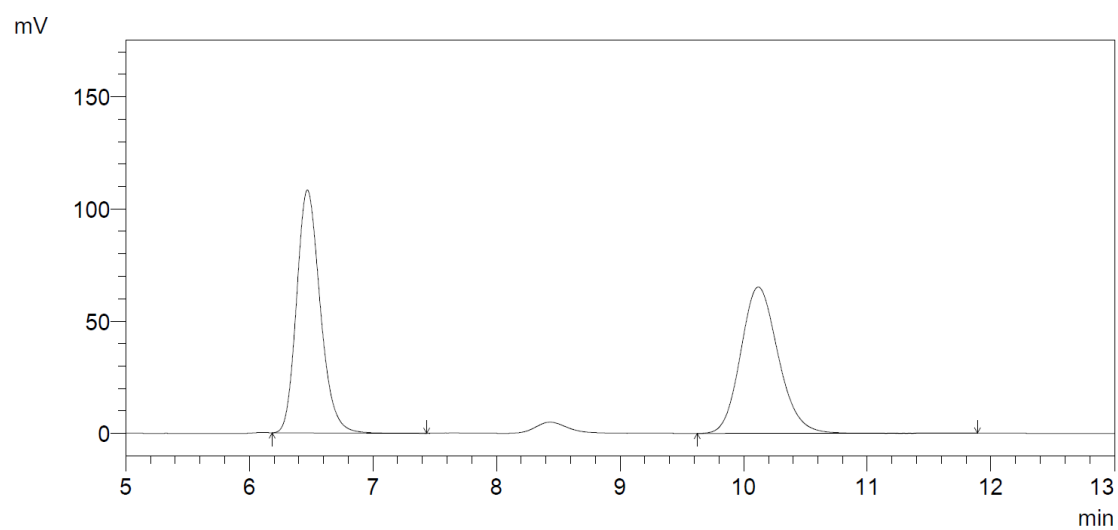

PDA 254nm

| ID# | Rt.Time | Area    | Height | Area%  |
|-----|---------|---------|--------|--------|
| 1   | 6.469   | 1435445 | 108142 | 51.108 |
| 2   | 10.118  | 1373189 | 65147  | 48.892 |

### HPLC spectra of chiral 3r''

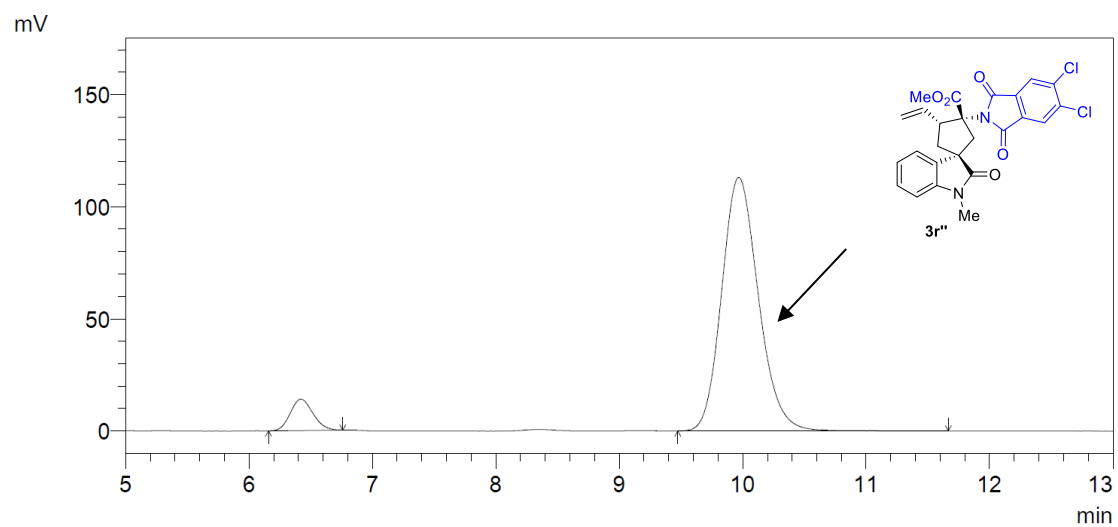

PDA 254nm

| ID# | Rt.Time | Area    | Height | Area%  |
|-----|---------|---------|--------|--------|
| 1   | 6.421   | 177807  | 13961  | 7.062  |
| 2   | 9.968   | 2339919 | 113031 | 92.938 |

**Chiral HPLC analysis:** Chiralcel AD-H, Hexane/*i*-PrOH = 85/15, flow rate 1.5 mL/min,  $\lambda = 254$  nm,  $t_{(1S,2R,4S)}$ -3r'' = 6.5 min (minor),  $t_{(1R,2S,4R)}$ -3r'' = 10.1 min (major).

### HPLC spectra of *rac*-3s

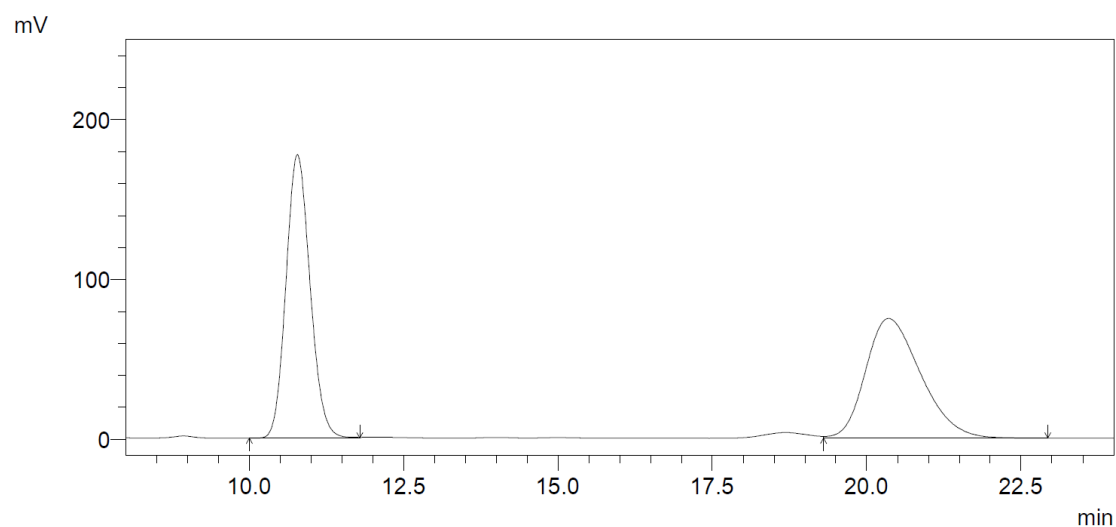

PDA 254nm

| ID# | Rt.Time | Area    | Height | Area%  |
|-----|---------|---------|--------|--------|
| 1   | 10.780  | 4817638 | 177362 | 50.931 |
| 2   | 20.356  | 4641589 | 74891  | 49.069 |

### HPLC spectra of chiral 3s

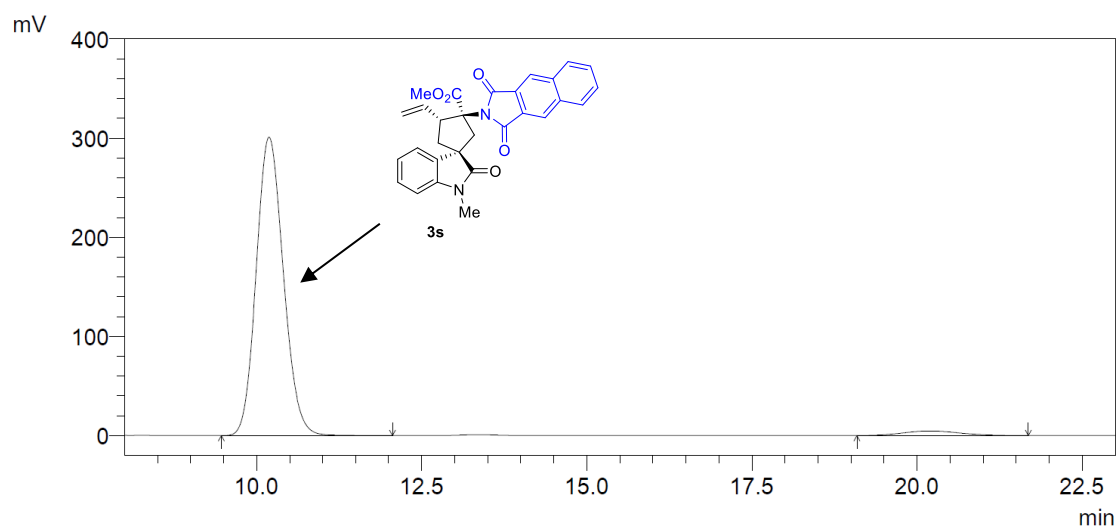

PDA 254nm

| ID# | Rt.Time | Area    | Height | Area%  |
|-----|---------|---------|--------|--------|
| 1   | 10.188  | 8602812 | 301151 | 96.798 |
| 2   | 20.197  | 284531  | 4658   | 3.202  |

**Chiral HPLC analysis:** Chiralcel AD-H, Hexane/*i*-PrOH = 70/30, flow rate 2.0 mL/min,  $\lambda = 254$  nm,  $t_{(1S,2R,4R)-3s} = 10.8$  min (major),  $t_{(1R,2S,4S)-3s} = 20.4$  min (minor).

### HPLC spectra of *rac*-3s'

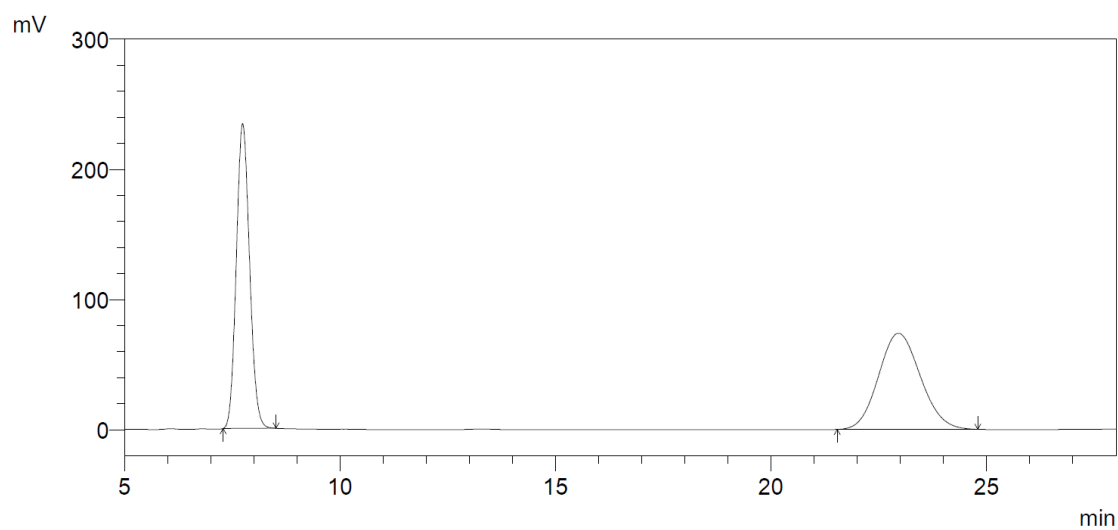

PDA 254nm

| ID# | Rt.Time | Area    | Height | Area%  |
|-----|---------|---------|--------|--------|
| 1   | 7.738   | 5005494 | 234317 | 50.119 |
| 2   | 22.955  | 4981716 | 73877  | 49.881 |

### HPLC spectra of chiral 3s'

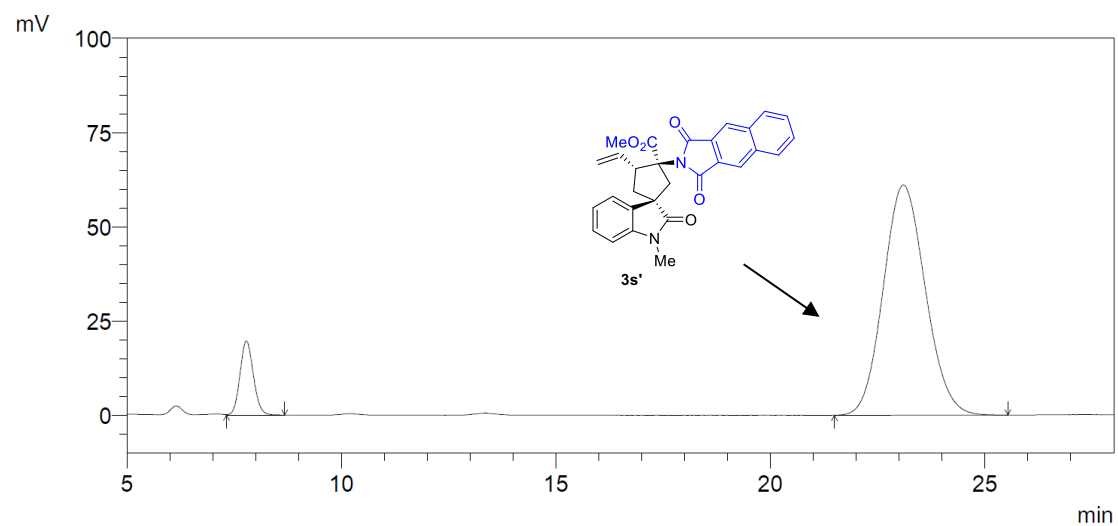

PDA 254nm

| ID# | Rt.Time | Area    | Height | Area%  |
|-----|---------|---------|--------|--------|
| 1   | 7.781   | 425208  | 19620  | 9.255  |
| 2   | 23.097  | 4168959 | 61055  | 90.745 |

**Chiral HPLC analysis:** Chiralcel AD-H, Hexane/*i*-PrOH = 70/30, flow rate 2.0 mL/min,  $\lambda = 254$  nm,  $t_{(1R,2R,4S)-3s'}$  = 7.7 min (minor),  $t_{(1S,2S,4R)-3s'}$  = 23.0 min (major).

### HPLC spectra of *rac*-3s''

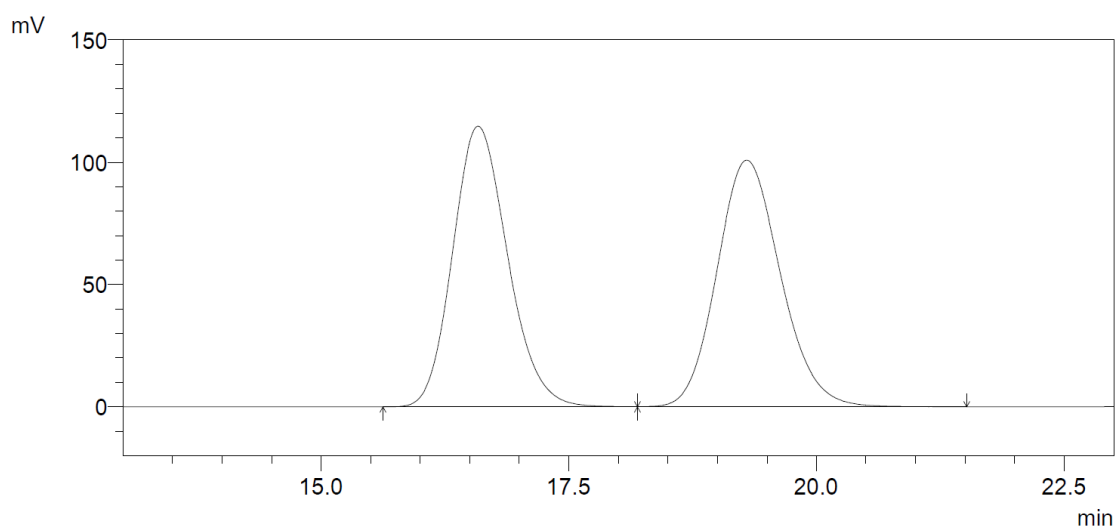

PDA 254nm

| ID# | Rt.Time | Area    | Height | Area%  |
|-----|---------|---------|--------|--------|
| 1   | 16.584  | 4439991 | 114848 | 49.589 |
| 2   | 19.296  | 4513598 | 100926 | 50.411 |

### HPLC spectra of chiral 3s''

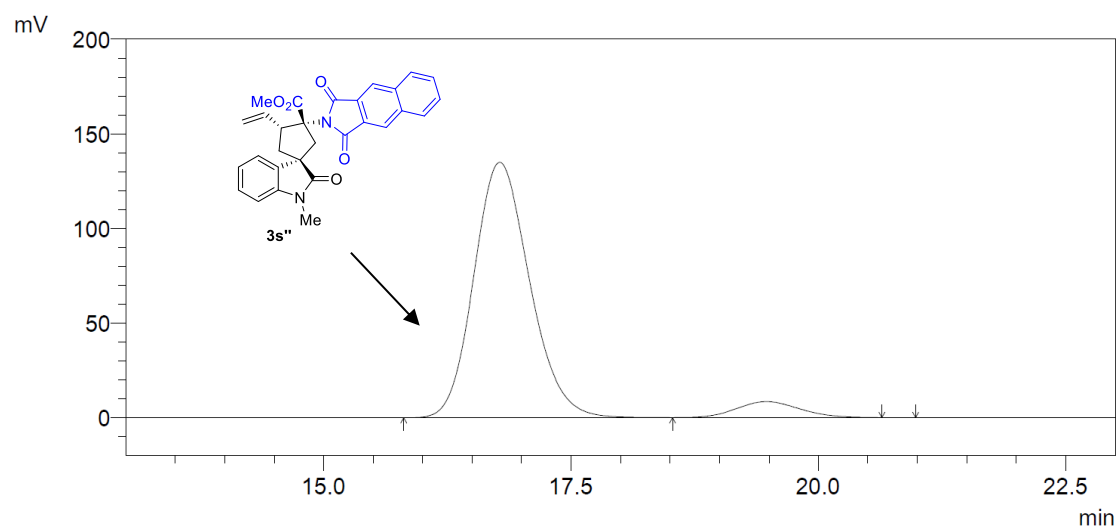

PDA 254nm

| ID# | Rt.Time | Area    | Height | Area%  |
|-----|---------|---------|--------|--------|
| 1   | 16.778  | 5297051 | 135016 | 93.362 |
| 2   | 19.475  | 376612  | 8423   | 6.638  |

**Chiral HPLC analysis:** Chiralcel AD-H, Hexane/*i*-PrOH = 85/15, flow rate 1.5 mL/min,  $\lambda = 254$  nm,  $t_{(1S,2R,4S)}$ -3s'' = 16.6 min (major),  $t_{(1R,2S,4R)}$ -3s'' = 19.3 min (minor).

### HPLC spectra of *rac*-3t

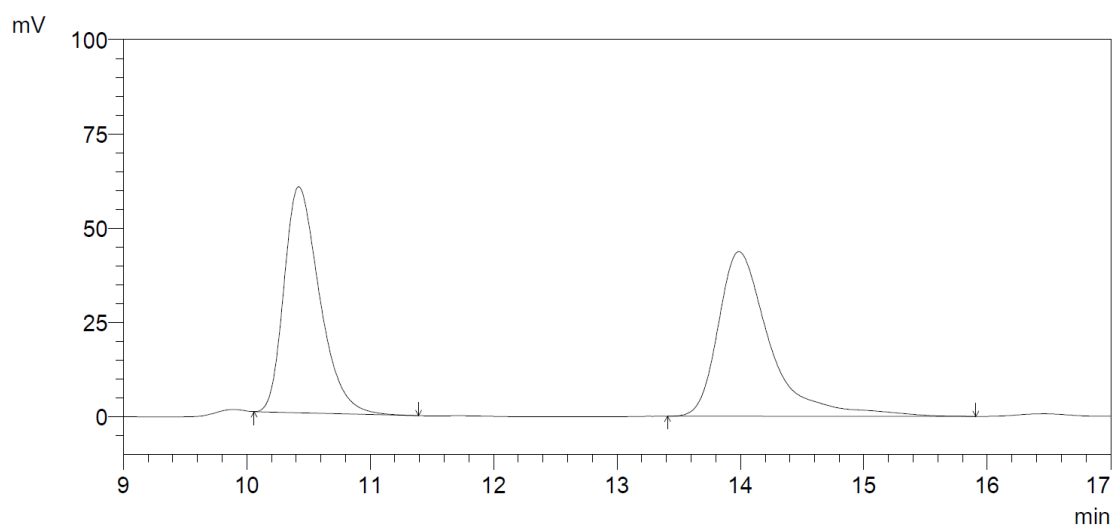

PDA 254nm

| ID# | Rt.Time | Area    | Height | Area%  |
|-----|---------|---------|--------|--------|
| 1   | 10.420  | 1201636 | 59945  | 48.493 |
| 2   | 13.987  | 1276304 | 43690  | 51.507 |

### HPLC spectra of chiral 3t

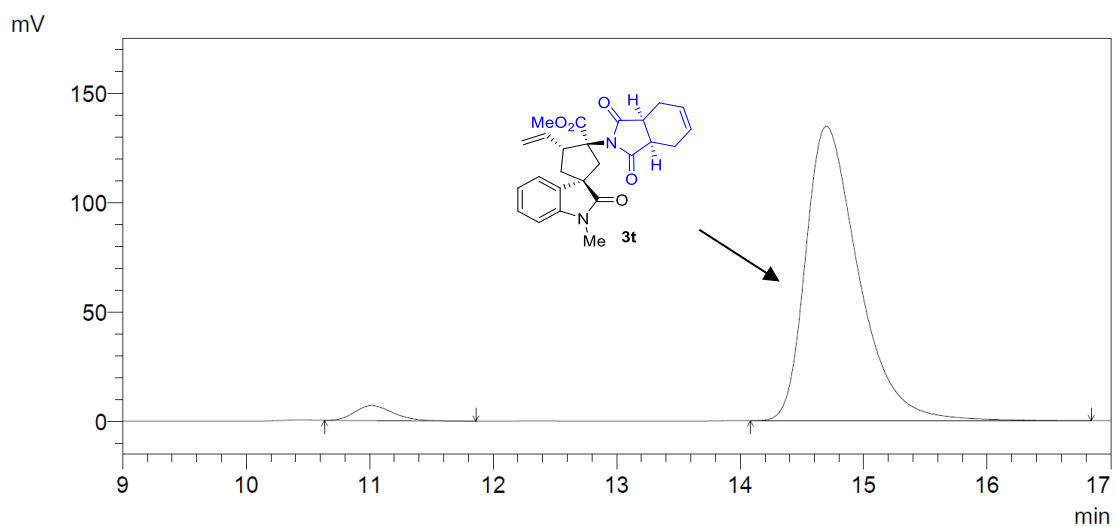

PDA 254nm

| ID# | Rt.Time | Area    | Height | Area%  |
|-----|---------|---------|--------|--------|
| 1   | 11.016  | 149172  | 6892   | 3.583  |
| 2   | 14.698  | 4014281 | 134773 | 96.417 |

**Chiral HPLC analysis:** Chiralcel IF, Hexane/*i*-PrOH = 85/15, flow rate 1.5 mL/min,  $\lambda = 254$  nm,  $t_{(1S,2R,4R)}\text{-3t} = 10.4$  min (minor),  $t_{(1R,2S,4S)}\text{-3t} = 14.0$  min (major).

### HPLC spectra of *rac*-3t'

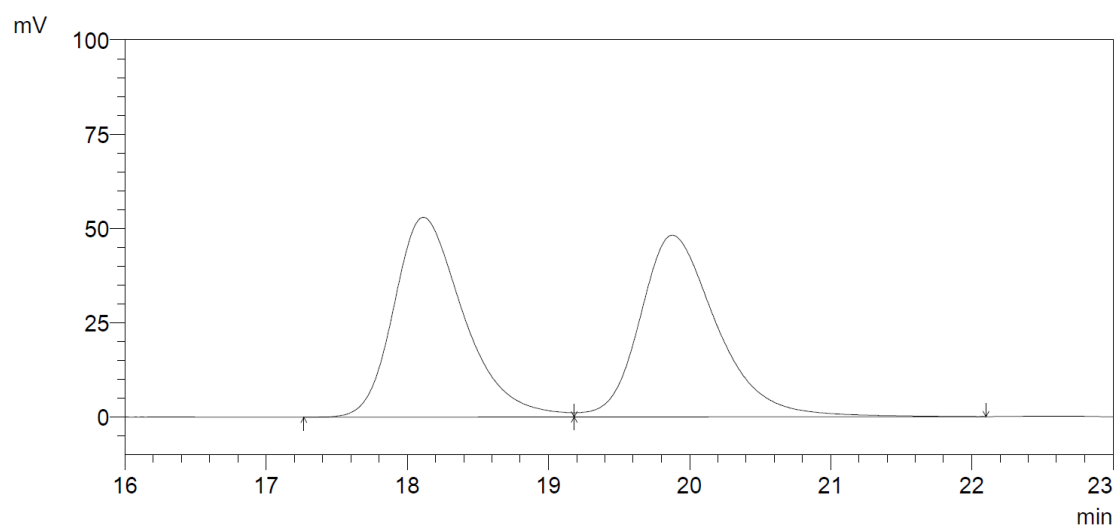

PDA 254nm

| ID# | Rt.Time | Area    | Height | Area%  |
|-----|---------|---------|--------|--------|
| 1   | 18.114  | 1827291 | 53006  | 49.996 |
| 2   | 19.878  | 1827608 | 48208  | 50.004 |

### HPLC spectra of chiral 3t'

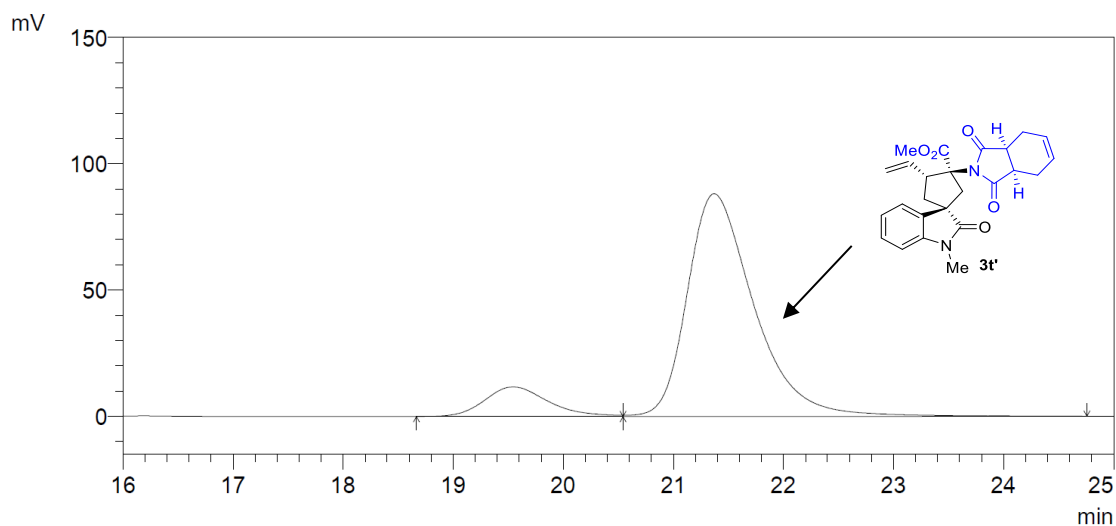

PDA 254nm

| ID# | Rt.Time | Area    | Height | Area%  |
|-----|---------|---------|--------|--------|
| 1   | 19.546  | 470805  | 11701  | 11.261 |
| 2   | 21.370  | 3710013 | 88236  | 88.739 |

**Chiral HPLC analysis:** Chiralcel IF, Hexane/*i*-PrOH = 85/15, flow rate 1.5 mL/min,  $\lambda = 254$  nm,  $t_{(1R,2R,4S)}$ -3t' = 18.1 min (minor),  $t_{(1S,2S,4R)}$ -3t' = 19.9 min (major).

### HPLC spectra of *rac*-3t''

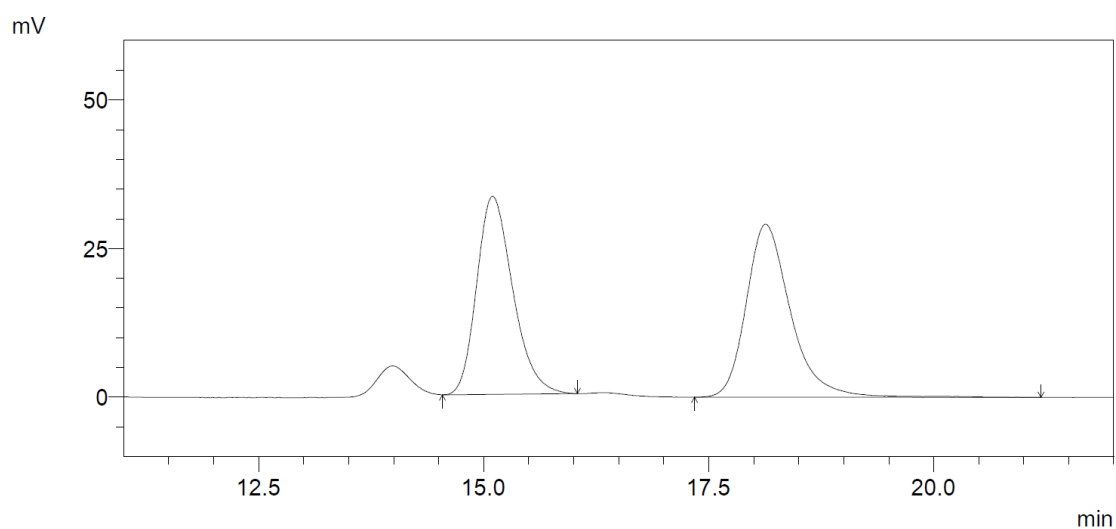

PDA 254nm

| ID# | Rt.Time | Area    | Height | Area%  |
|-----|---------|---------|--------|--------|
| 1   | 15.099  | 931307  | 33339  | 48.143 |
| 2   | 18.132  | 1003170 | 29128  | 51.857 |

### HPLC spectra of chiral 3t''

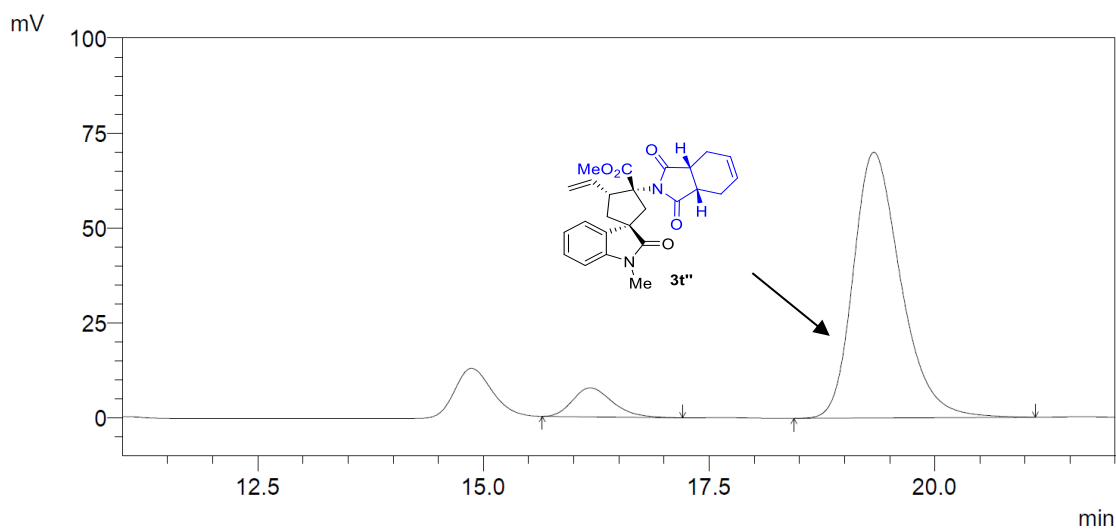

PDA 254nm

| ID# | Rt.Time | Area    | Height | Area%  |
|-----|---------|---------|--------|--------|
| 1   | 16.182  | 234965  | 7653   | 8.390  |
| 2   | 19.326  | 2565469 | 70026  | 91.610 |

**Chiral HPLC analysis:** Chiralcel IF, Hexane/*i*-PrOH = 85/15, flow rate 1.5 mL/min,  $\lambda = 254$  nm,  $t_{(1S,2R,4S)}\text{-}3t'' = 15.1$  min (minor),  $t_{(1R,2S,4R)}\text{-}3t'' = 18.1$  min (major).

## HPLC spectra of *rac*-3u

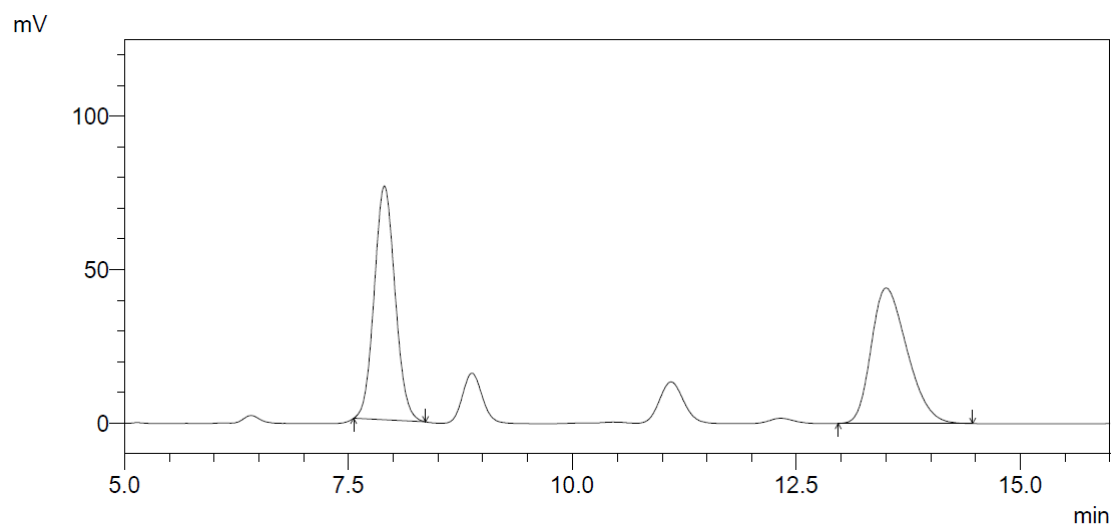

PDA 254nm

| ID# | Rt.Time | Area    | Height | Area%  |
|-----|---------|---------|--------|--------|
| 1   | 7.900   | 1234055 | 76144  | 50.096 |
| 2   | 13.501  | 1229334 | 44118  | 49.904 |

## HPLC spectra of chiral 3u

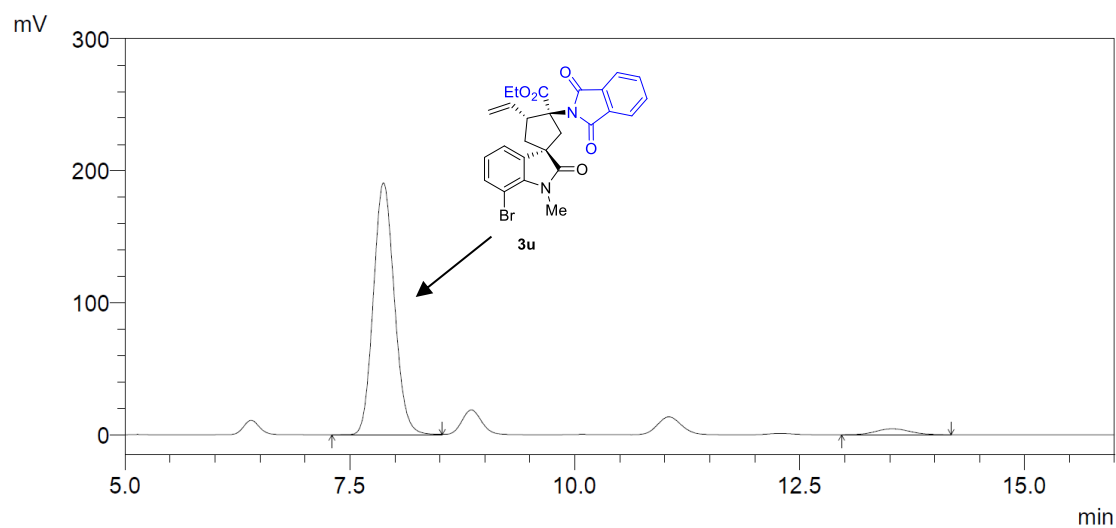

PDA 254nm

| ID# | Rt.Time | Area    | Height | Area%  |
|-----|---------|---------|--------|--------|
| 1   | 7.872   | 3099091 | 190944 | 96.248 |
| 2   | 13.529  | 120801  | 4538   | 3.752  |

**Chiral HPLC analysis:** Chiralcel AD-H, Hexane/*i*-PrOH = 85/15, flow rate 1.5 mL/min,  $\lambda = 254$  nm,  $t_{(1S,2R,4R)\text{-}3u} = 7.9$  min (major),  $t_{(1R,2S,4S)\text{-}3u} = 13.5$  min (minor).

### HPLC spectra of *rac*-3u'

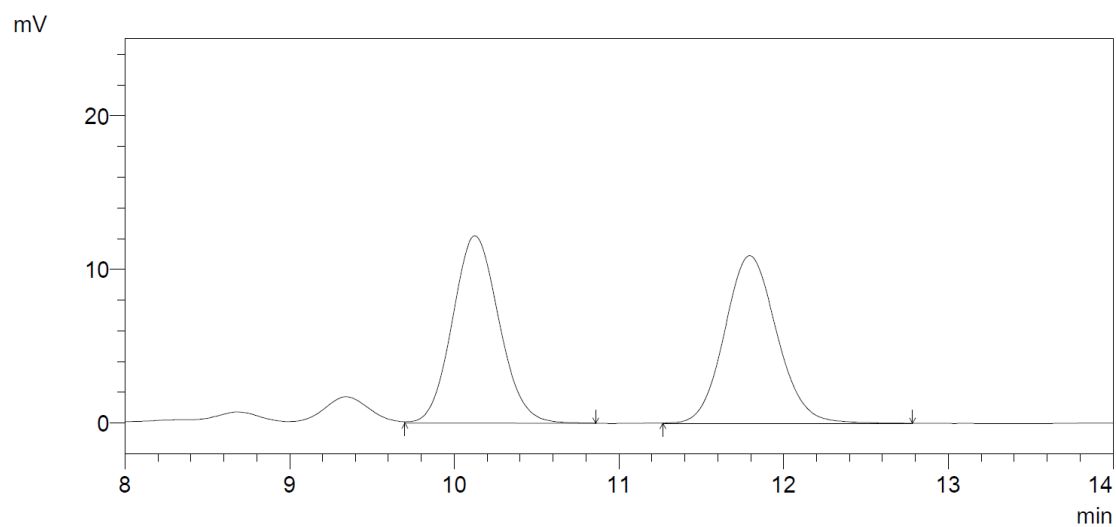

PDA 254nm

| ID# | Rt.Time | Area   | Height | Area%  |
|-----|---------|--------|--------|--------|
| 1   | 10.125  | 239805 | 12192  | 49.894 |
| 2   | 11.794  | 240822 | 10913  | 50.106 |

### HPLC spectra of chiral 3u'

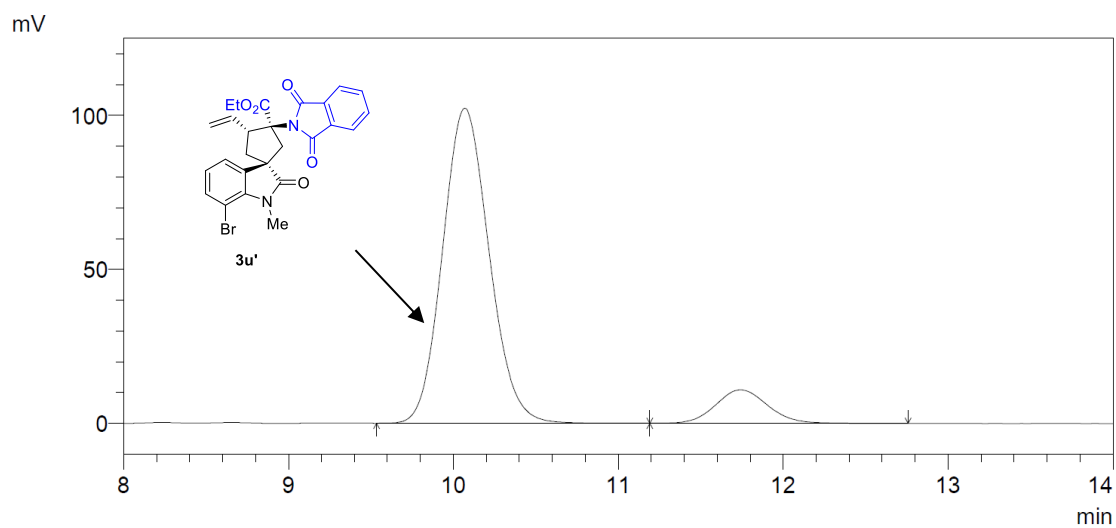

PDA 254nm

| ID# | Rt.Time | Area    | Height | Area%  |
|-----|---------|---------|--------|--------|
| 1   | 10.069  | 2012838 | 102402 | 89.282 |
| 2   | 11.742  | 241629  | 10915  | 10.718 |

**Chiral HPLC analysis:** Chiralcel AD-H, Hexane/*i*-PrOH = 85/15, flow rate 1.5 mL/min,  $\lambda = 254$  nm,  $t_{(1R,2R,4S)}$ -3u' = 10.1 min (major),  $t_{(1S,2S,4R)}$ -3u' = 11.8 min (minor).

### HPLC spectra of *rac*-3u''

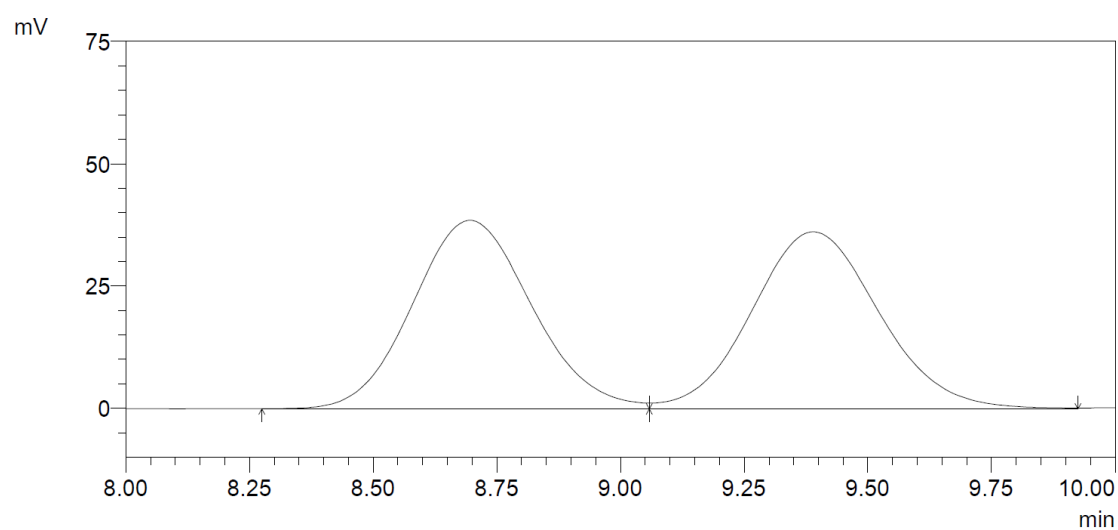

PDA 254nm

| ID# | Rt.Time | Area   | Height | Area%  |
|-----|---------|--------|--------|--------|
| 1   | 8.695   | 647500 | 38565  | 49.864 |
| 2   | 9.390   | 651030 | 36240  | 50.136 |

### HPLC spectra of chiral 3u''

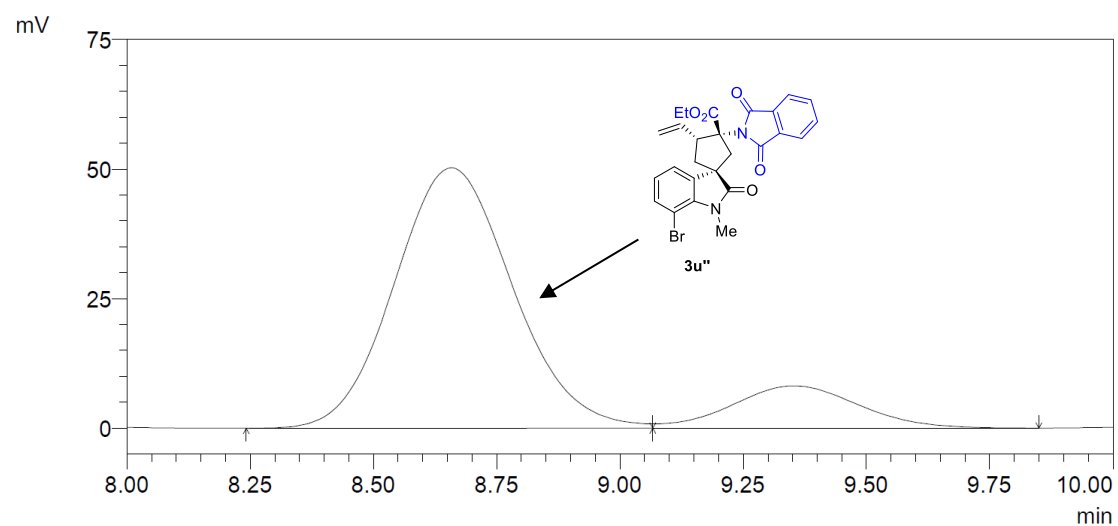

PDA 254nm

| ID# | Rt.Time | Area   | Height | Area%  |
|-----|---------|--------|--------|--------|
| 1   | 8.658   | 841079 | 50319  | 85.205 |
| 2   | 9.353   | 146049 | 8183   | 14.795 |

**Chiral HPLC analysis:** Chiralcel AD-H, Hexane/*i*-PrOH = 85/15, flow rate 1.5 mL/min,  $\lambda = 254$  nm,  $t_{(1S,2R,4S)}$ -3u'' = 8.7 min (major),  $t_{(1R,2S,4R)}$ -3u'' = 9.4 min (minor).

### HPLC spectra of *rac*-4

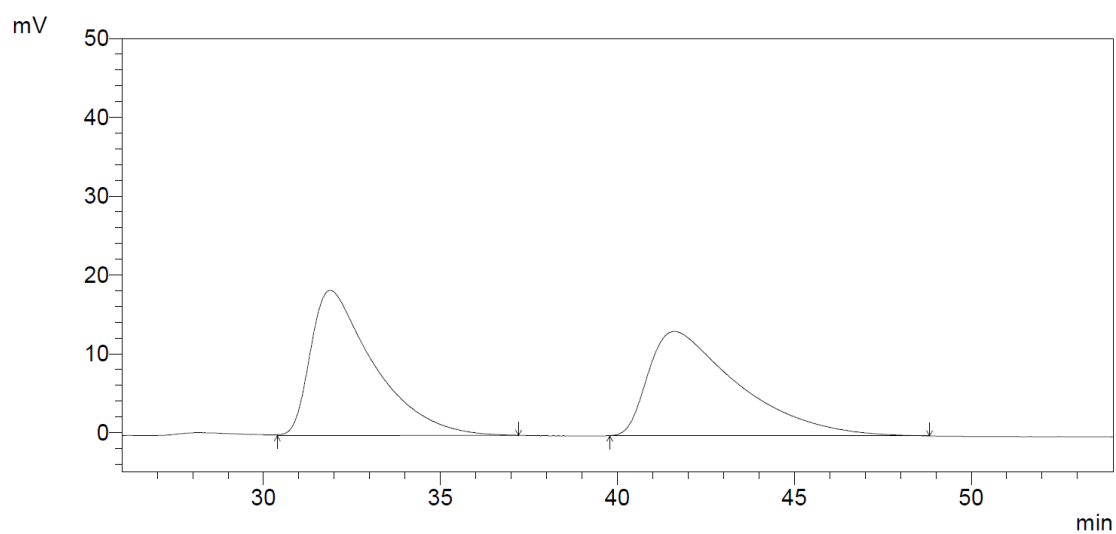

PDA 254nm

| ID# | Rt.Time | Area    | Height | Area%  |
|-----|---------|---------|--------|--------|
| 1   | 31.890  | 2291849 | 18419  | 49.484 |
| 2   | 41.607  | 2339604 | 13271  | 50.516 |

### HPLC spectra of chiral 4

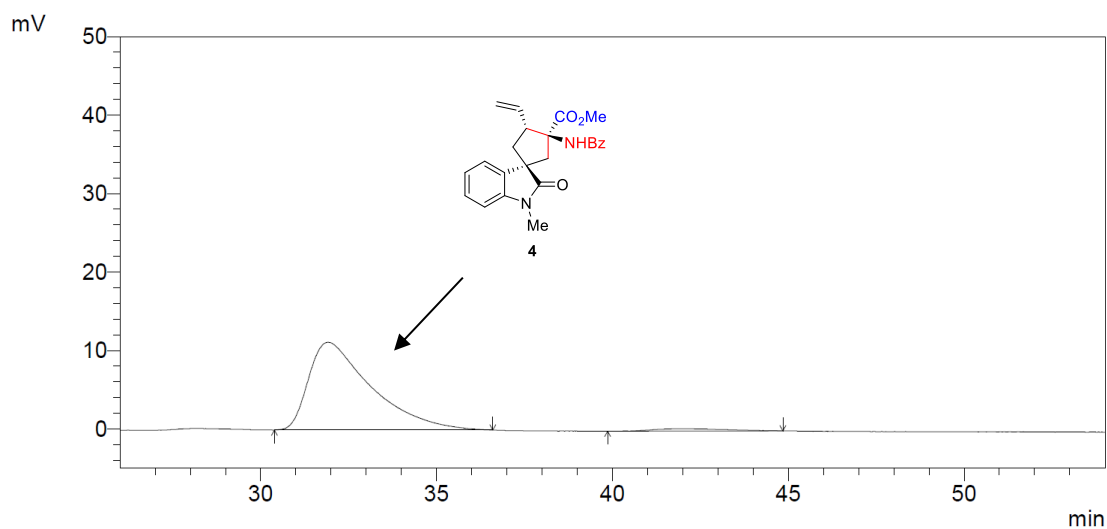

PDA 254nm

| ID# | Rt.Time | Area    | Height | Area%  |
|-----|---------|---------|--------|--------|
| 1   | 31.918  | 1380696 | 11175  | 97.073 |
| 2   | 41.876  | 41633   | 308    | 2.927  |

**Chiral HPLC analysis:** Chiralcel AD-H, Hexane/*i*-PrOH = 93/7, flow rate 0.8 mL/min,  $\lambda = 254$  nm,  $t_{(1S,2R,4R)-4} = 31.9$  min (major),  $t_{(1R,2S,4S)-4} = 41.6$  min (minor).

## HPLC spectra of *rac*-5

mV

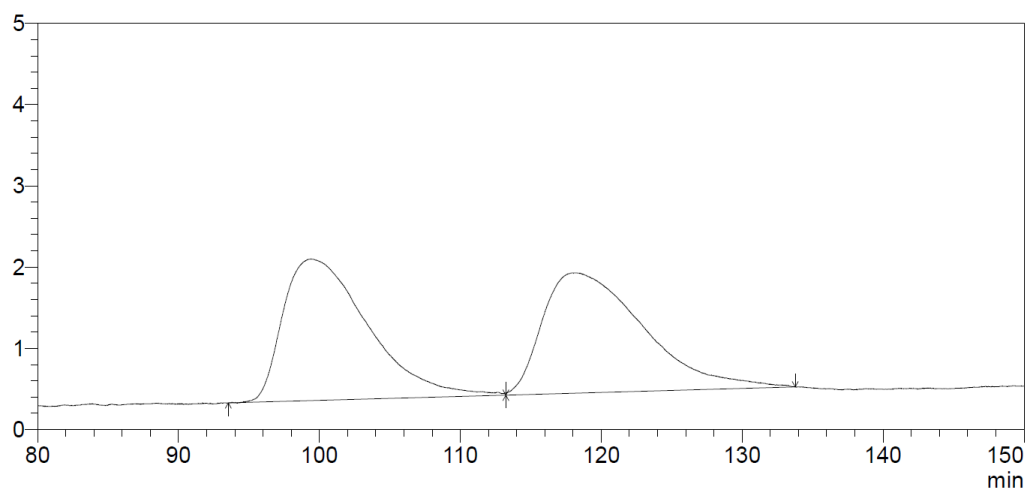

PDA 254nm

| ID# | Rt.Time | Area   | Height | Area%  |
|-----|---------|--------|--------|--------|
| 1   | 99.410  | 728313 | 1743   | 49.730 |
| 2   | 118.060 | 736229 | 1482   | 50.270 |

## HPLC spectra of chiral 5

mV

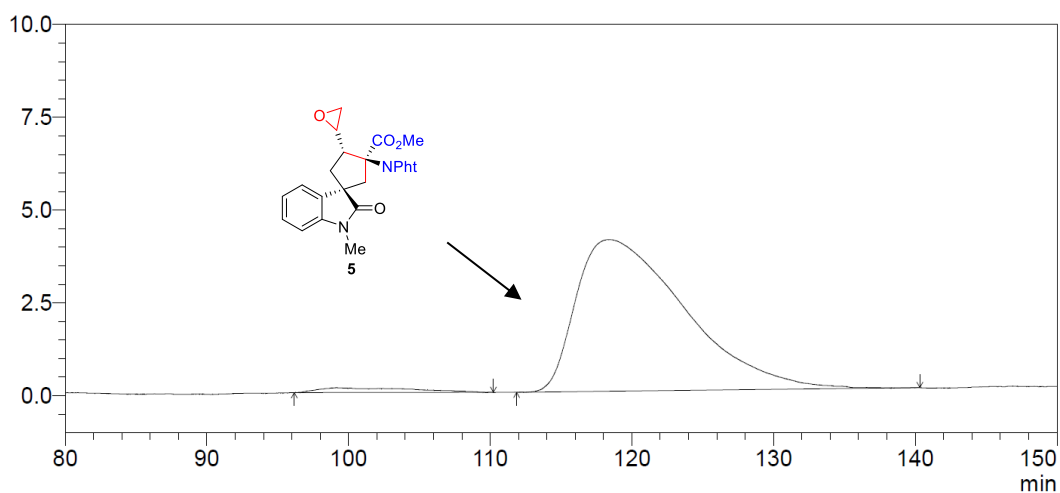

PDA 254nm

| ID# | Rt.Time | Area    | Height | Area%  |
|-----|---------|---------|--------|--------|
| 1   | 99.122  | 59687   | 130    | 2.667  |
| 2   | 118.310 | 2178367 | 4086   | 97.333 |

**Chiral HPLC analysis:** Chiralcel AD-H, Hexane/*i*-PrOH = 93/7, flow rate 0.8 mL/min,  $\lambda = 254$  nm,  $t_{(1S,2R,4R)-5} = 99.4$  min (minor),  $t_{(1R,2S,4S)-5} = 118.1$  min (major).

## HPLC spectra of *rac*-6

mV

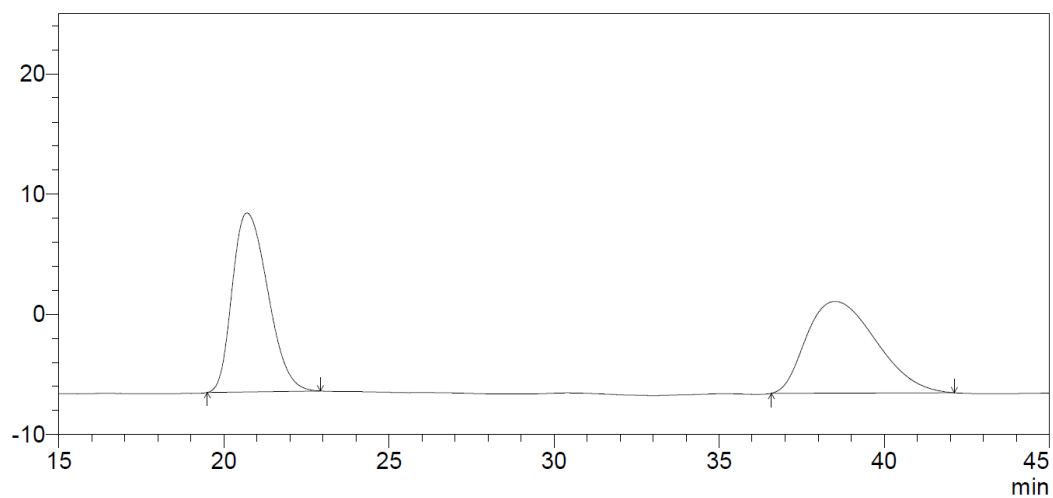

PDA 254nm

| ID# | Rt.Time | Area    | Height | Area%  |
|-----|---------|---------|--------|--------|
| 1   | 20.702  | 1116464 | 14893  | 49.935 |
| 2   | 38.508  | 1119392 | 7628   | 50.065 |

## HPLC spectra of chiral 6

mV

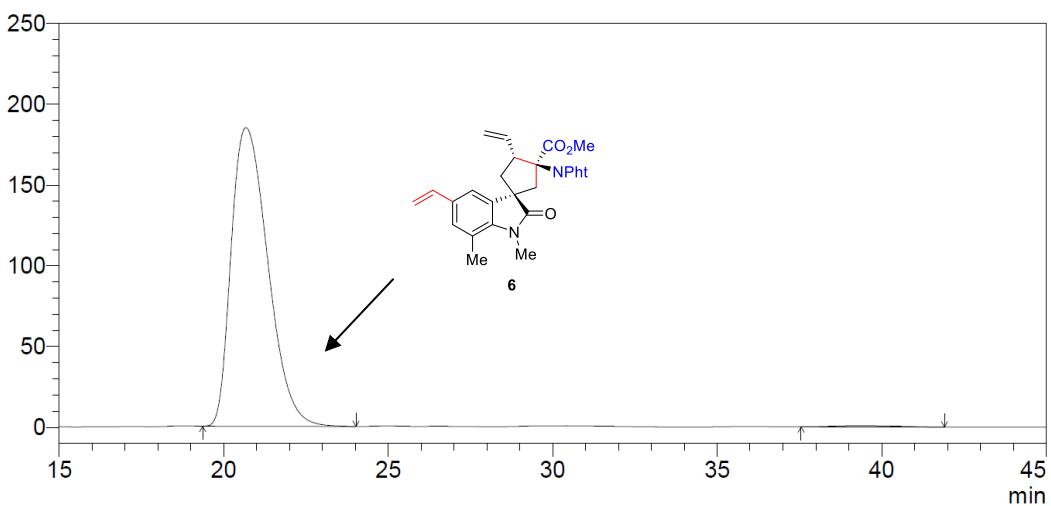

PDA 254nm

| ID# | Rt.Time | Area     | Height | Area%  |
|-----|---------|----------|--------|--------|
| 1   | 20.679  | 14373143 | 185031 | 99.269 |
| 2   | 39.338  | 105803   | 817    | 0.731  |

**Chiral HPLC analysis:** Chiralcel AD-H, Hexane/*i*-PrOH = 90/10, flow rate 1.0 mL/min,  $\lambda = 254$  nm,  $t_{(1S,2R,4R)}-6 = 20.7$  min (major),  $t_{(1R,2S,4S)}-6 = 38.5$  min (minor).
